# Supplementary material for: 2-Arylquinolines as novel anticancer agents with dual EGFR/FAK kinase inhibitory activity: synthesis, biological evaluation, and molecular modelling insights
Source: PubMed Central journal article supplement (PMC8725837; doi:10.1080/14756366.2021.2015344), 2021-12-20
Supplement: IENZ_A_2015344_SM3876.pdf [file IENZ_A_2015344_SM3876.pdf]

## Supplementary Data

### Discovery of novel 4-propoxy-2-arylquinolines as dual EGFR and FAK inhibitors with *in vitro* antitumor activity

Mostafa M. Elbadawi <sup>a, b, \*</sup>, Wagdy M. Eldehna <sup>b</sup>, Amer Ali Abd El-Hafeez <sup>c, d</sup>, Warda R. Soma <sup>e</sup>, Amgad Albohy <sup>f</sup>, Keli K. Agama <sup>g</sup>, Pradipta Ghosh <sup>d, h, i, j</sup>, Yves Pommier <sup>g</sup>, and Manabu Abe <sup>a, \*\*</sup>

<sup>a</sup> Department of Chemistry, Graduate School of Science, Hiroshima University, 1-3-1 Kagamiyama, Higashi-Hiroshima, Hiroshima 739-8526, Japan

<sup>b</sup> Department of Pharmaceutical Chemistry, Faculty of Pharmacy, Kafrelsheikh University, Kafrelsheikh 33516, Egypt

<sup>c</sup> Pharmacology and Experimental Oncology Unit, Cancer Biology Department, National Cancer Institute, Cairo University, Cairo, Egypt

<sup>d</sup> Department of Cellular and Molecular Medicine, University of California San Diego, La Jolla, CA, USA

<sup>e</sup> Faculty of Pharmacy, Kafrelsheikh University, Kafrelsheikh 33516, Egypt

<sup>f</sup> Department of Pharmaceutical Chemistry, Faculty of Pharmacy, The British University in Egypt (BUE), El-Sherouk City, Suez Desert Road, Cairo 11837, Egypt

<sup>g</sup> Developmental Therapeutics Branch & Laboratory of Molecular Pharmacology, Center for Cancer Research, National Cancer Institute, NIH, Bethesda, Maryland, USA

<sup>h</sup> Department of Medicine, University of California San Diego, La Jolla, CA, USA

<sup>i</sup> Moores Comprehensive Cancer Center, University of California San Diego, La Jolla, CA, USA

<sup>j</sup> Veterans Affairs Medical Center, La Jolla, CA, USA

\* Corresponding author: [mostafa\\_elbadawi@pharm.kfs.edu.eg](mailto:mostafa_elbadawi@pharm.kfs.edu.eg)

\*\* Corresponding author: [mabe@hiroshima-u.ac.jp](mailto:mabe@hiroshima-u.ac.jp)

### Table of contents

| Content                                          | Page |
|--------------------------------------------------|------|
| NMR data.....                                    | S2   |
| Topoisomerase I-mediated DNA cleavage assay..... | S114 |
| Table S1. Kinase profiling.....                  | S118 |
| Representative HPLC traces.....                  | S119 |

# NMR data

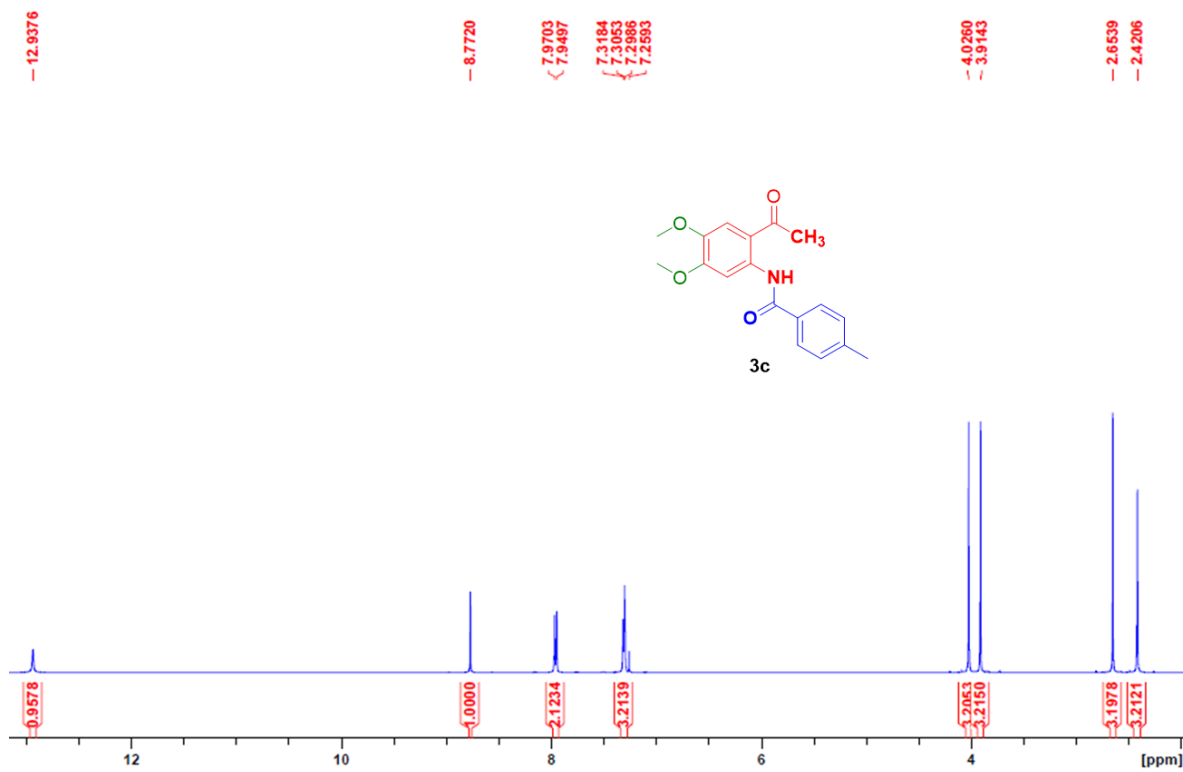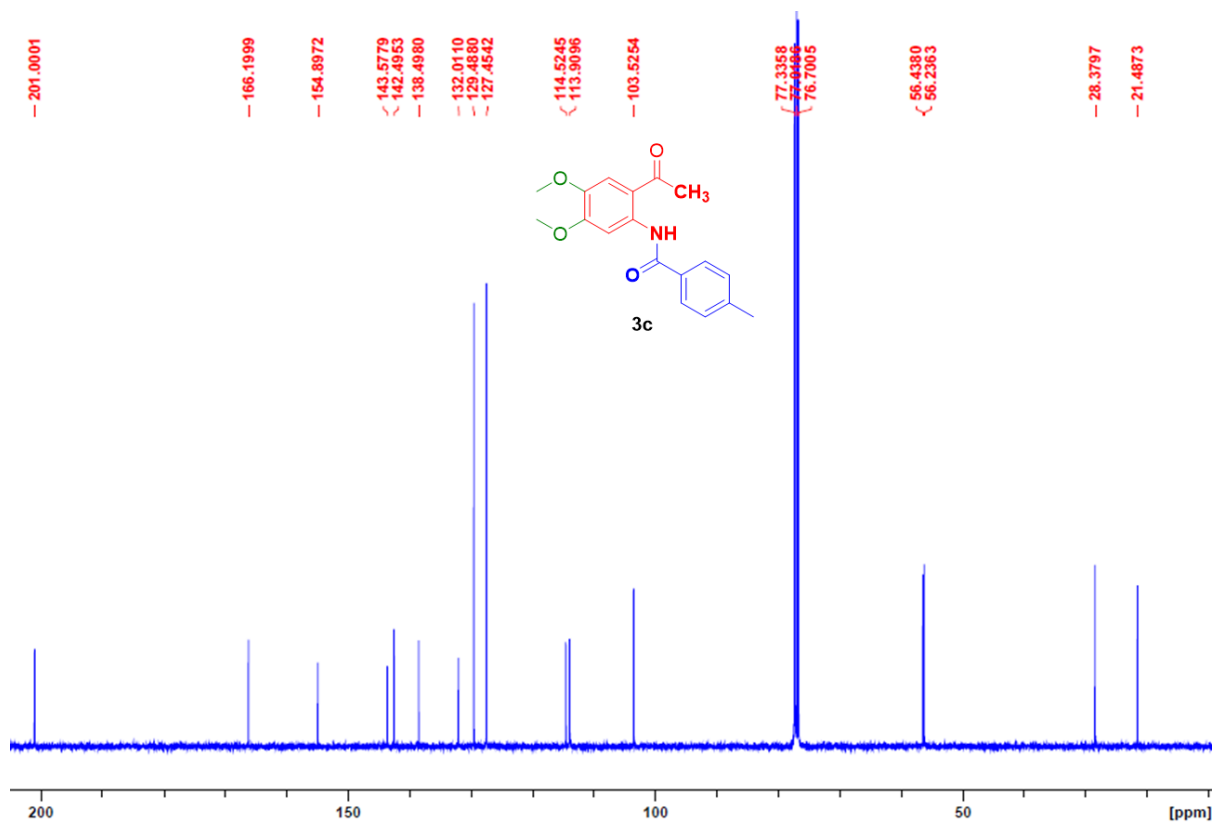

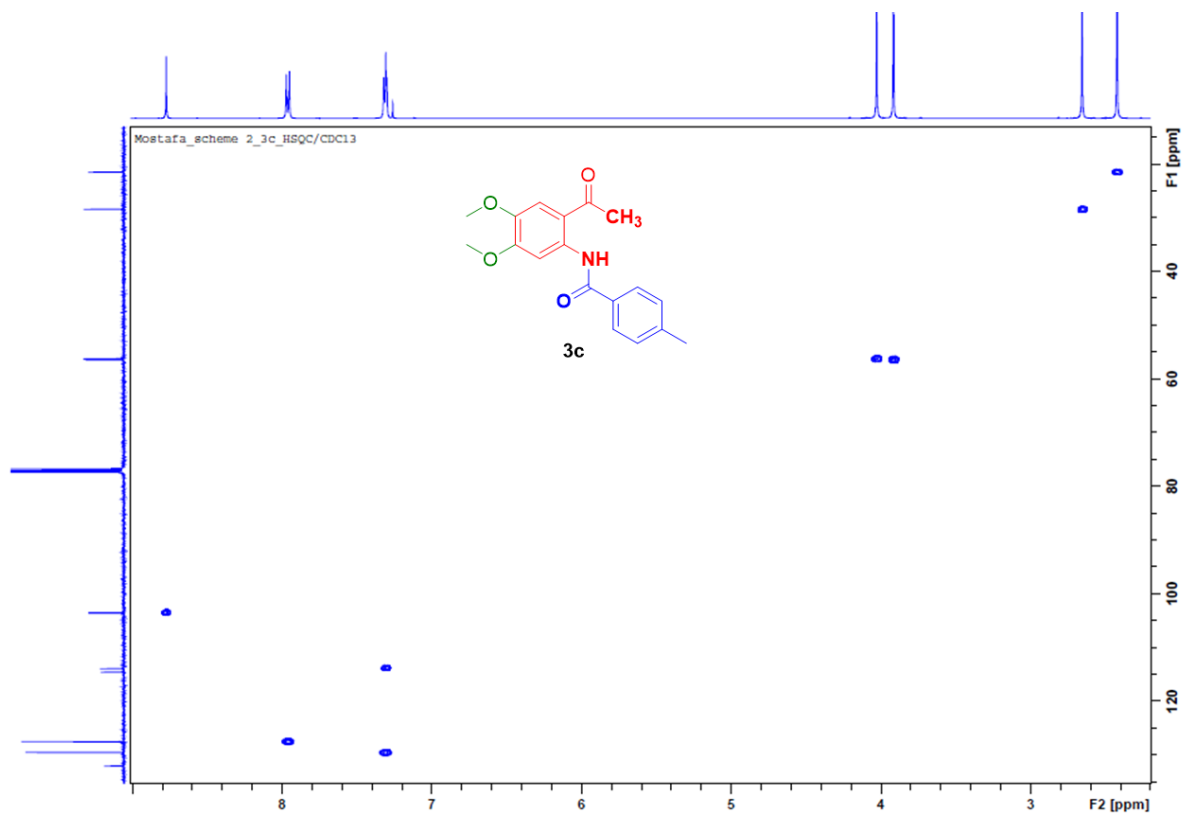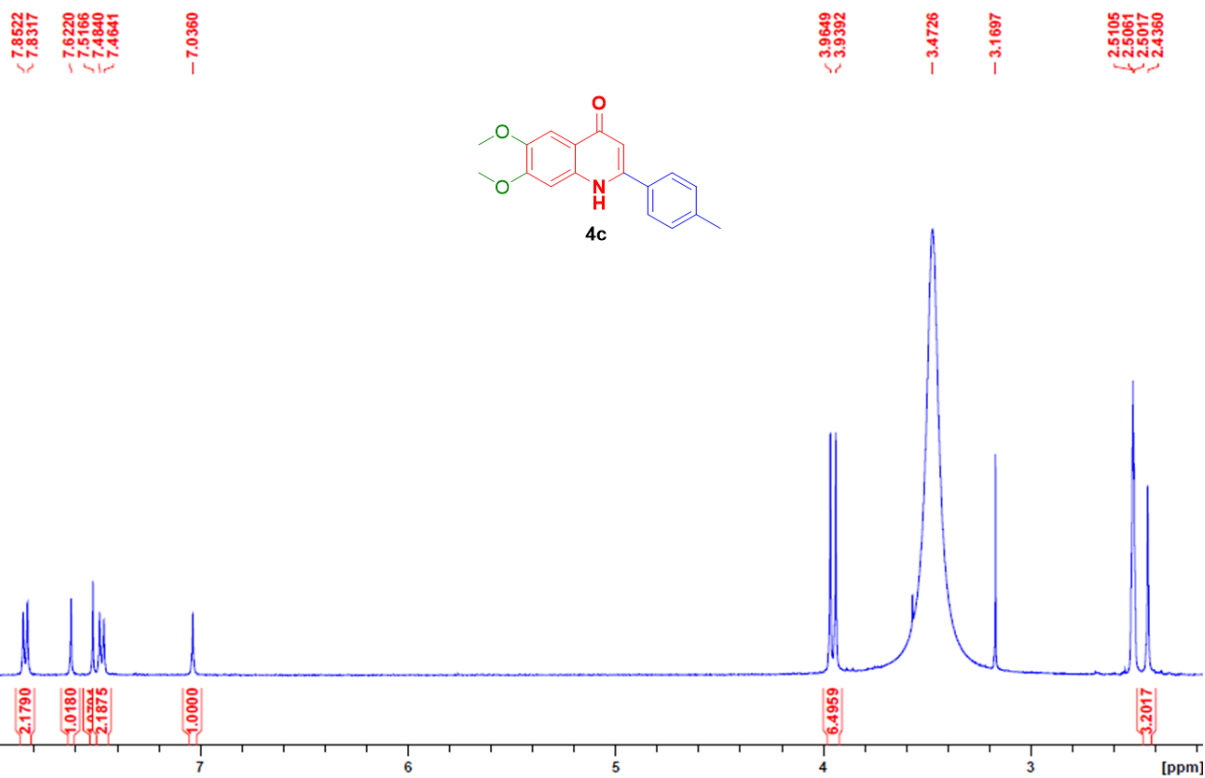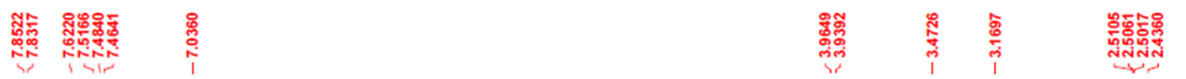

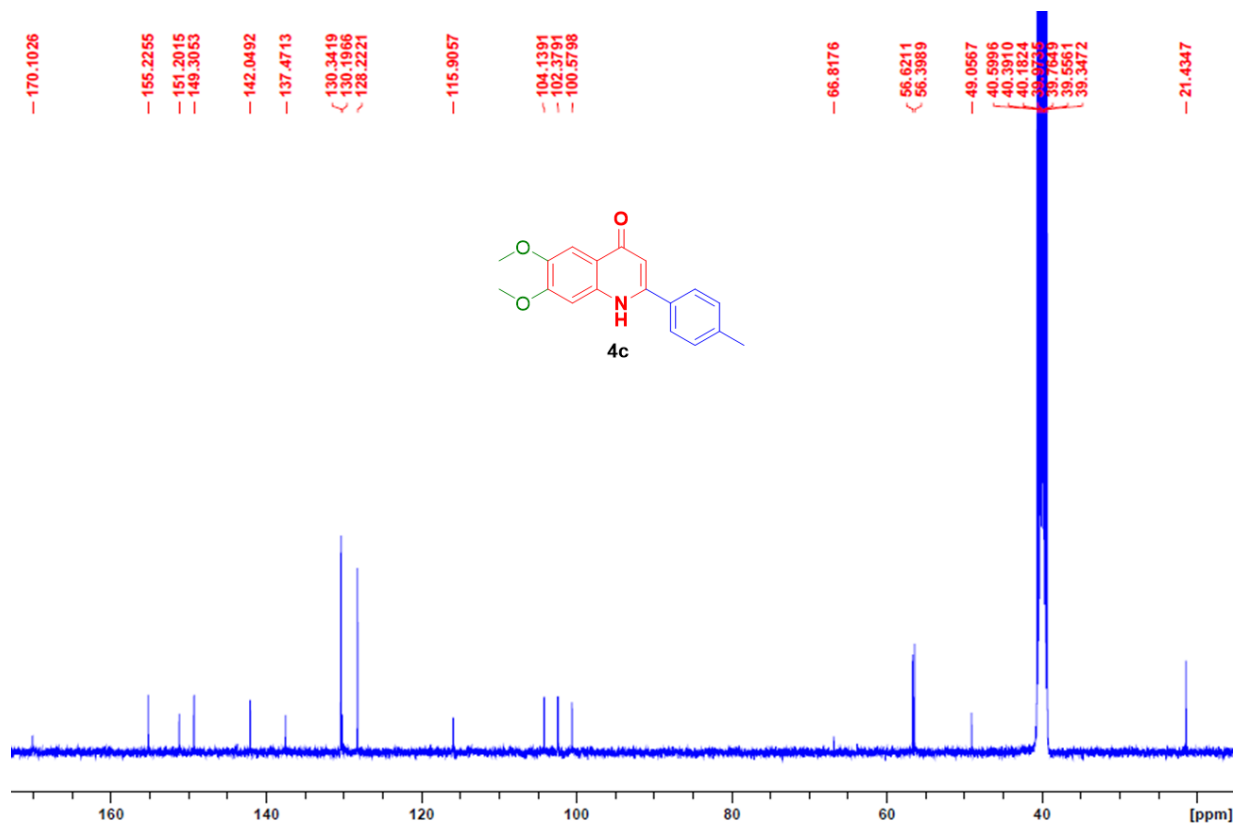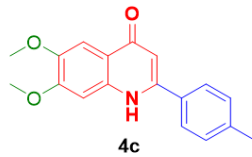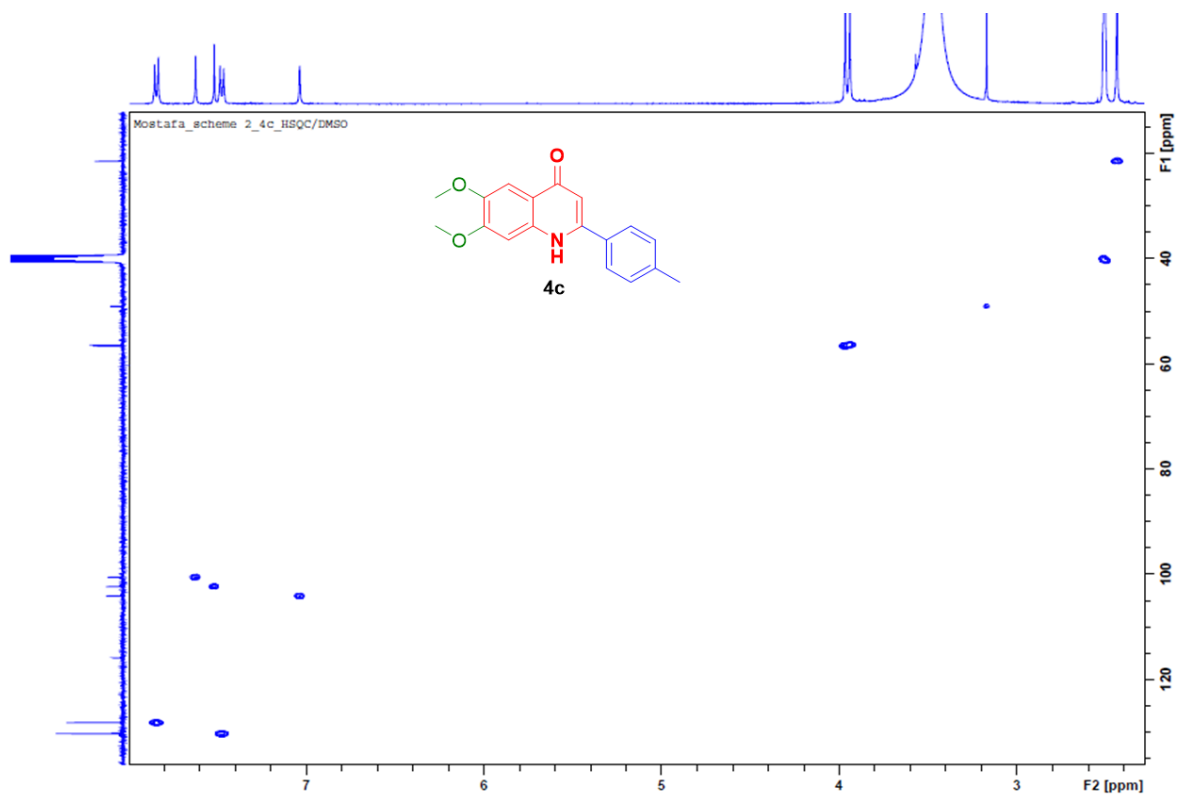

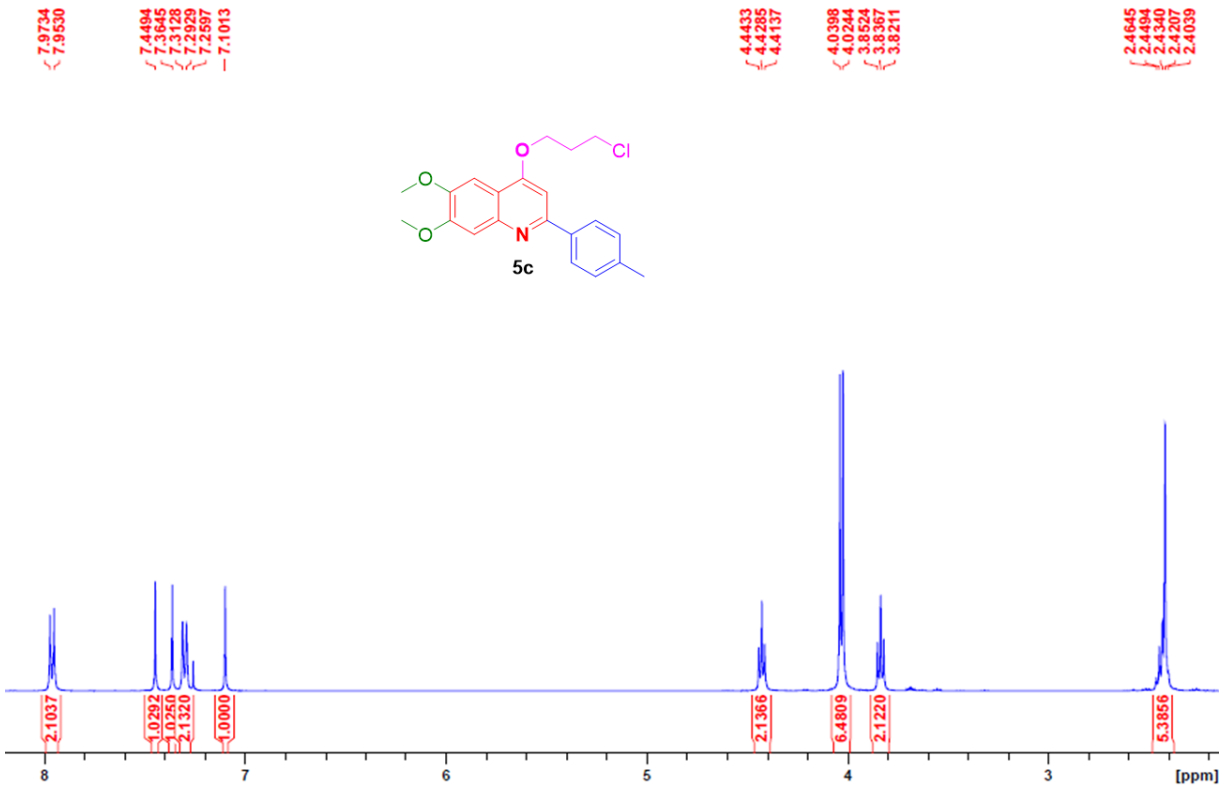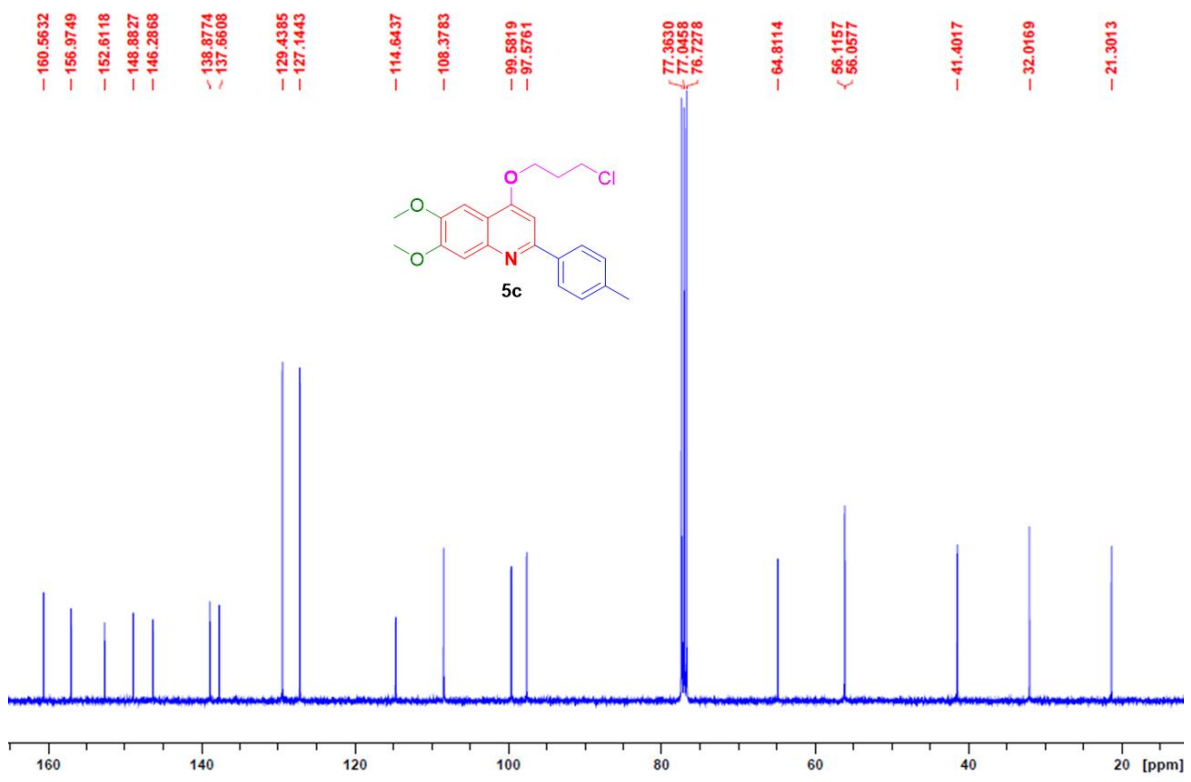

\*Mostafa\_scheme 2\_5c\_COSY 2D\* 1 1 \*F:\PhD\Scheme 2-quinoline\NMR\5c\COSY\*

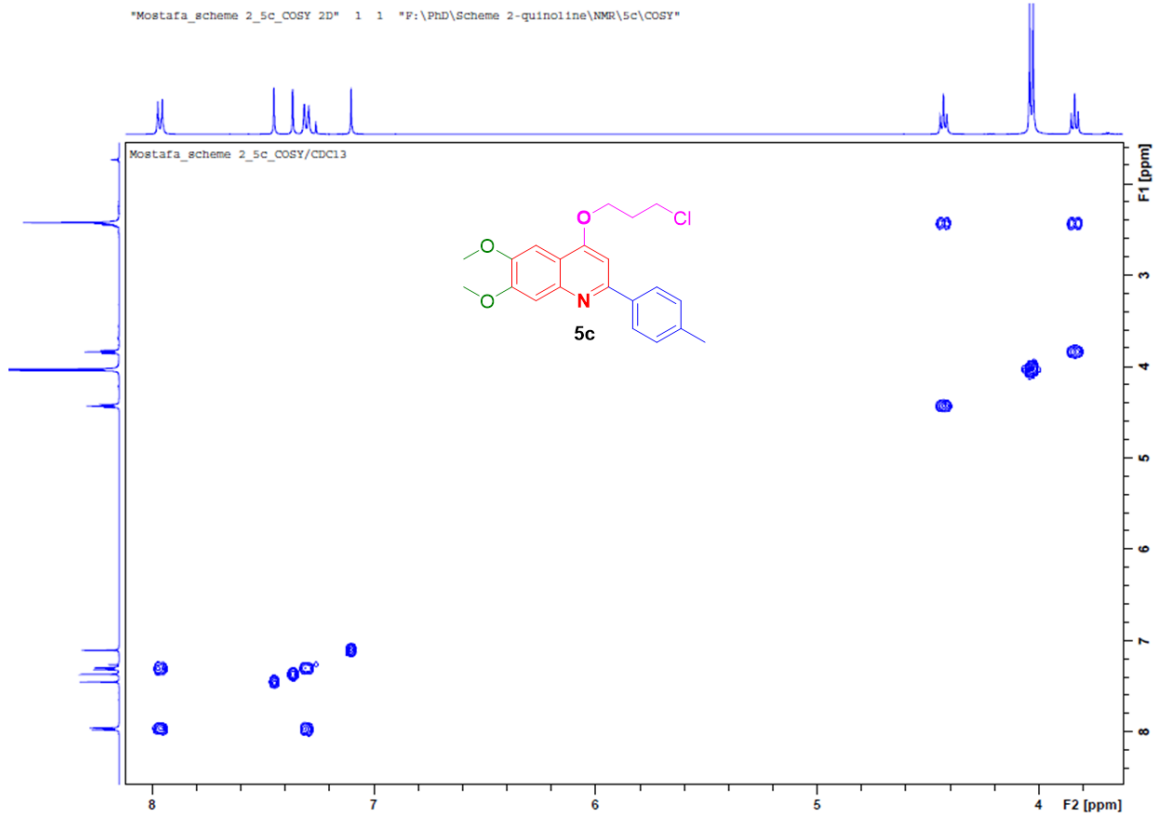

8.0051  
7.9836

7.4566  
7.4351  
7.4094  
7.3794  
7.2598

7.0398

4.3289  
4.3131  
4.2972

4.0267  
4.0115

M 2.8673  
2.8429  
2.8184  
2.7939  
M 2.5618  
2.2920  
2.1932  
2.1771  
2.1585  
2.1415  
2.1247

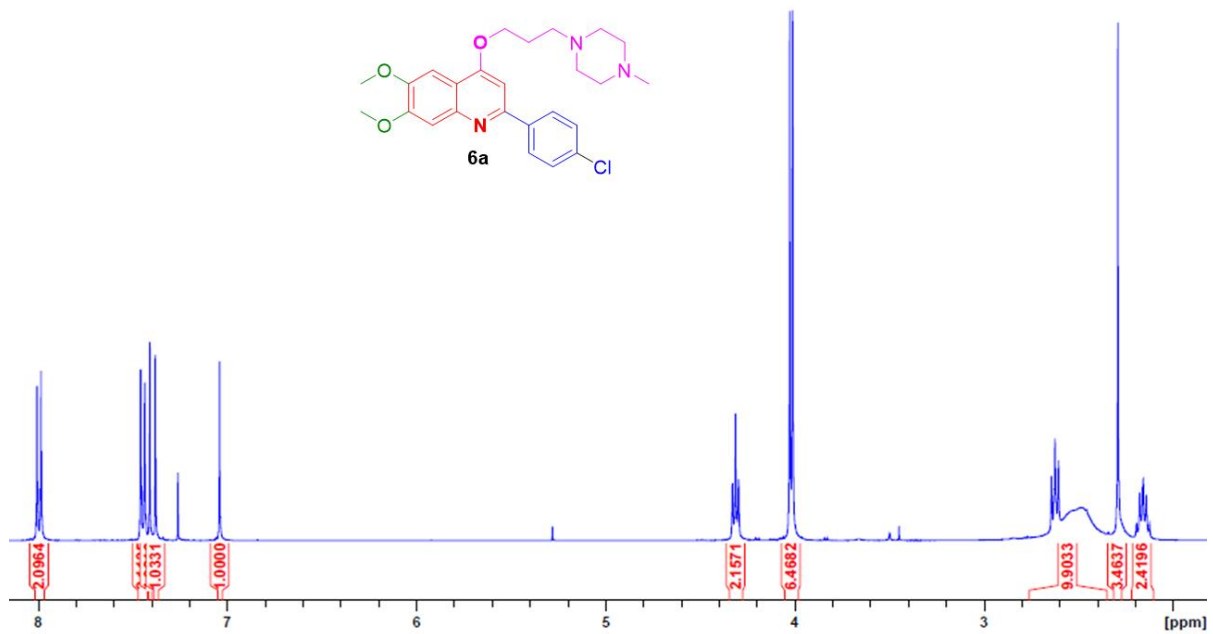

2.0964

1.0331

1.0010

2.1571

6.4682

9.9033

3.4637

2.4196

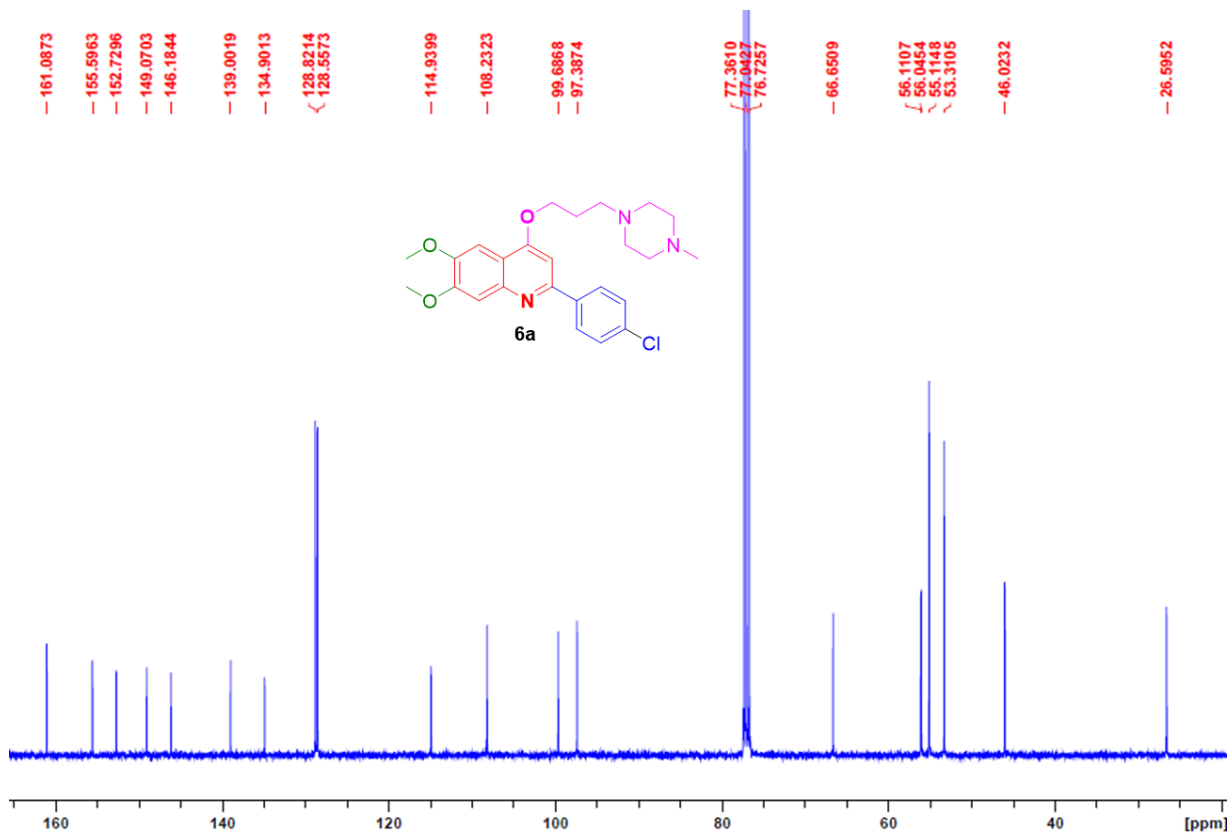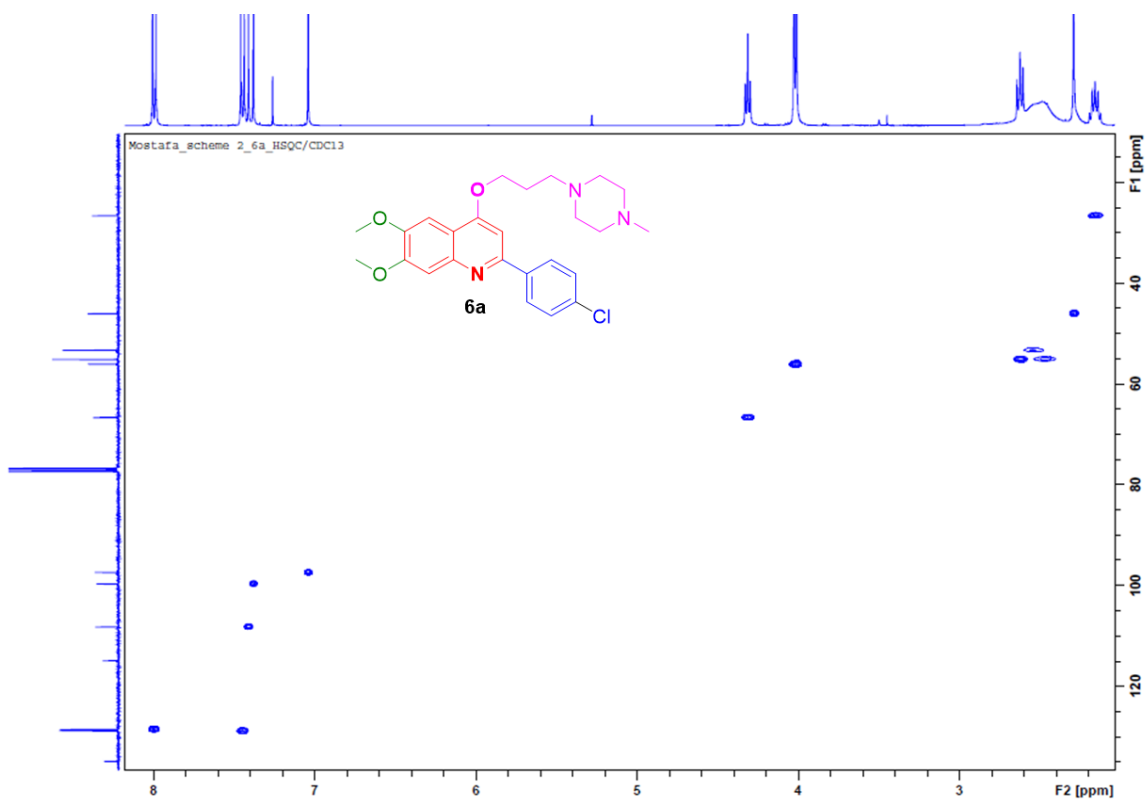

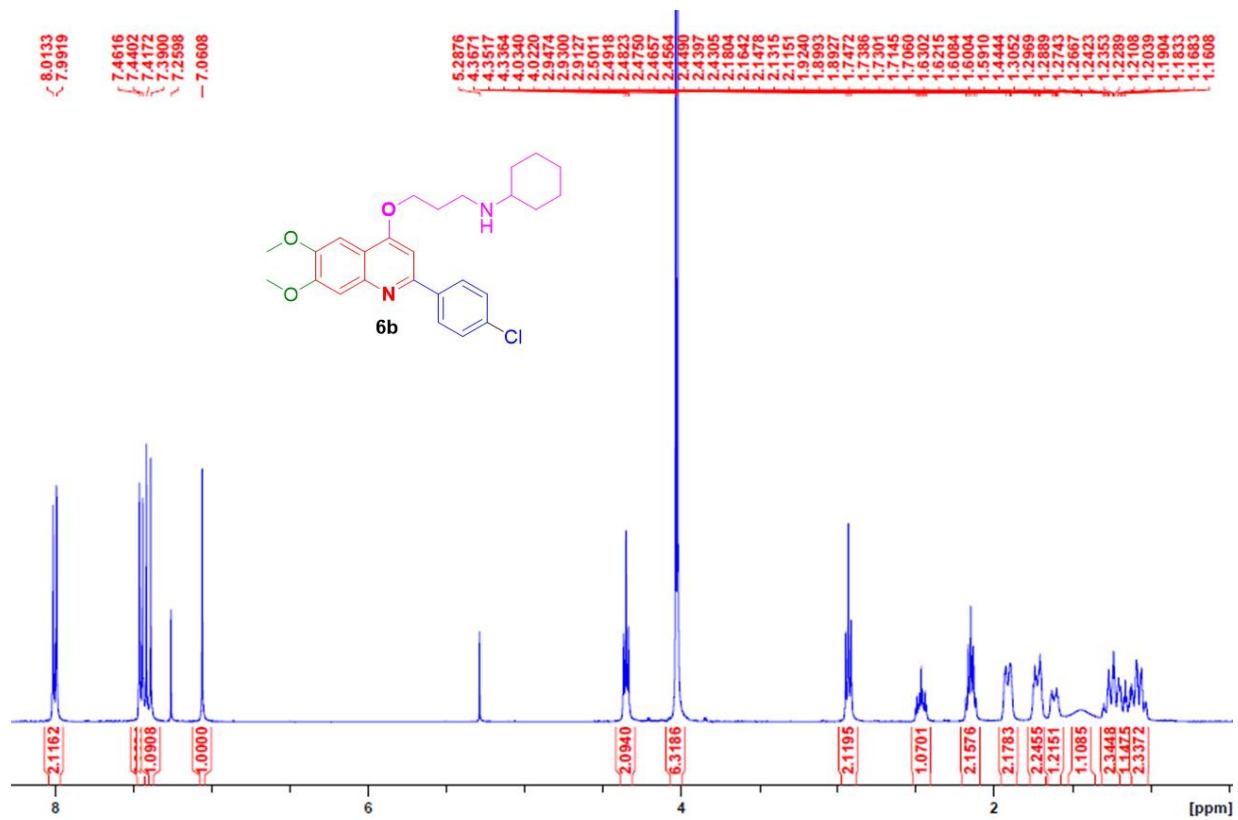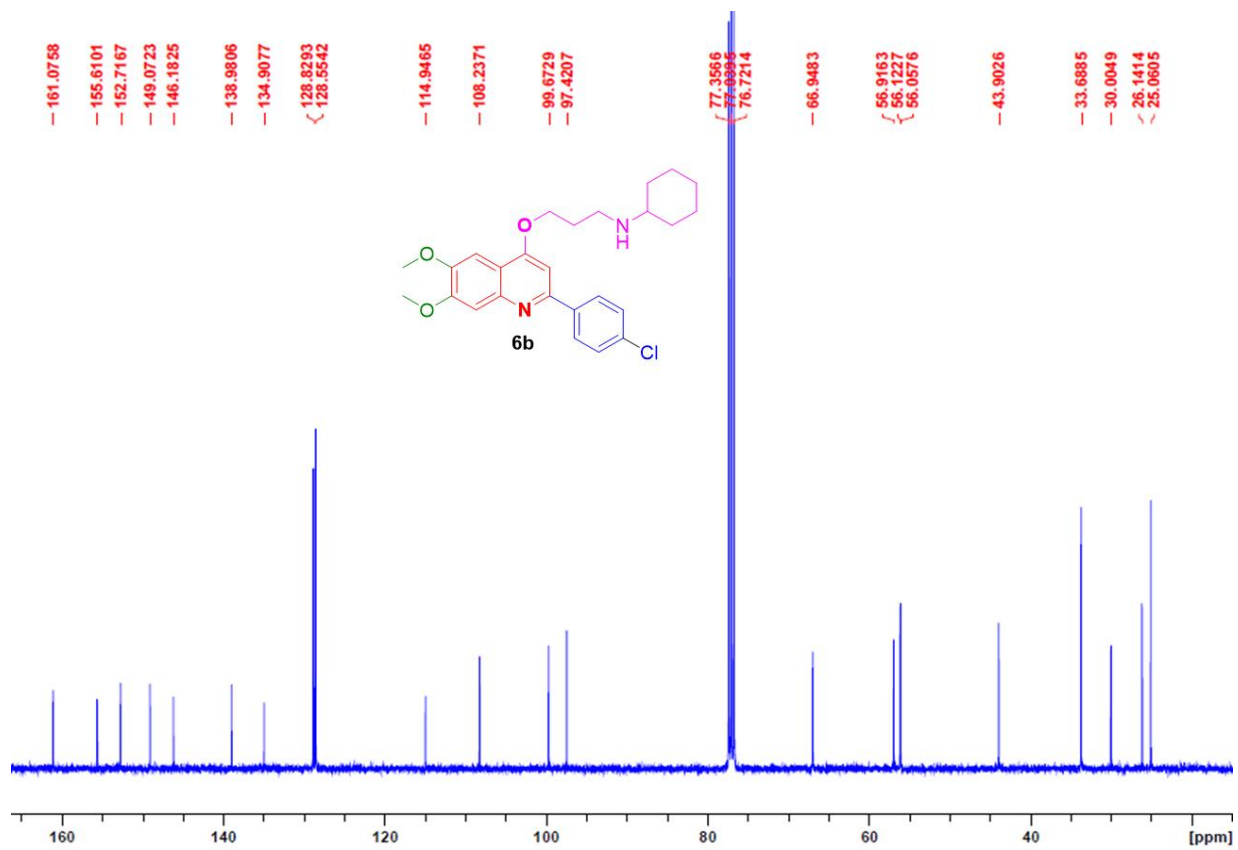



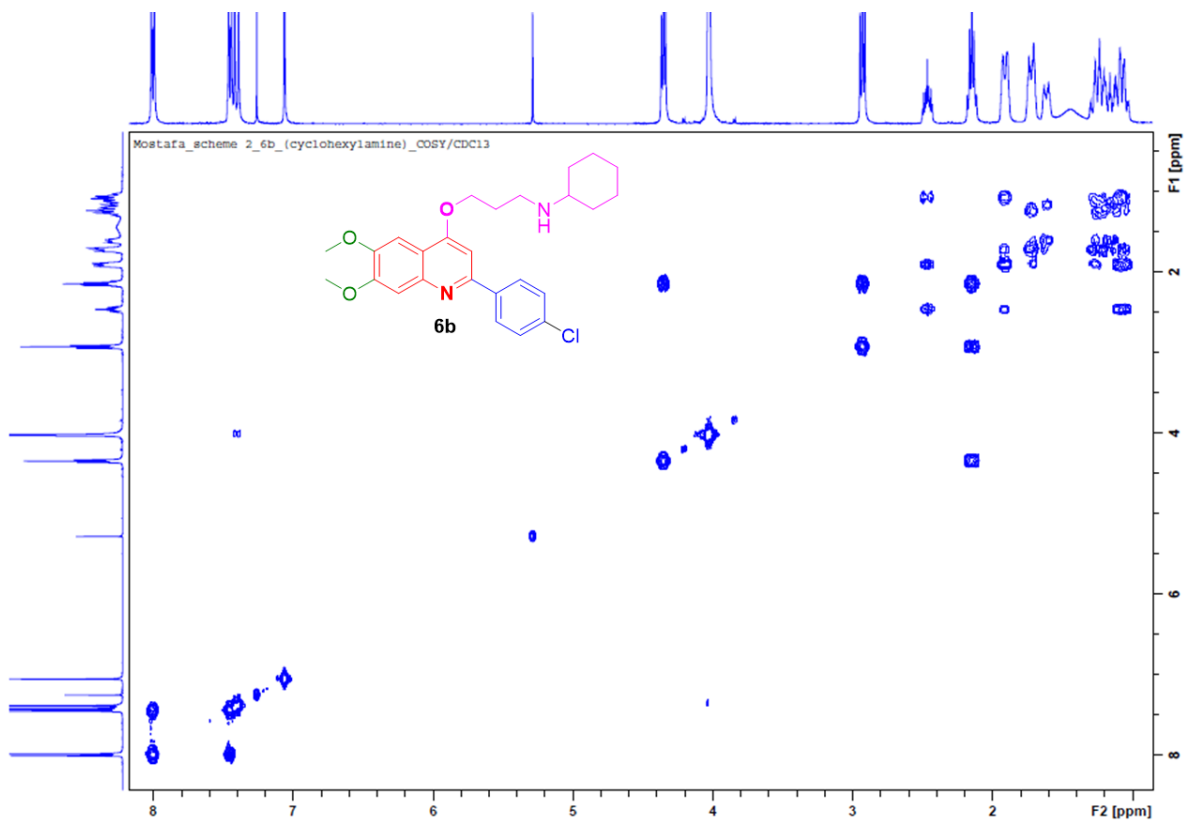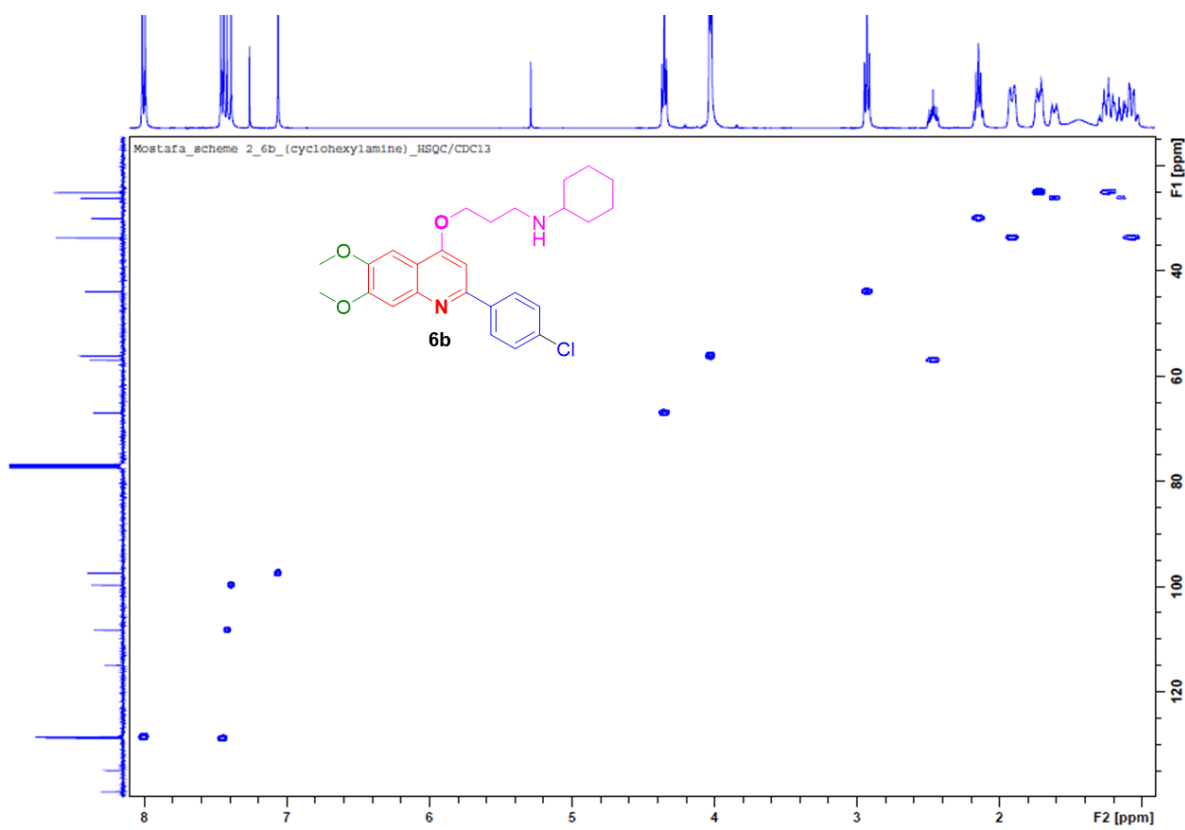

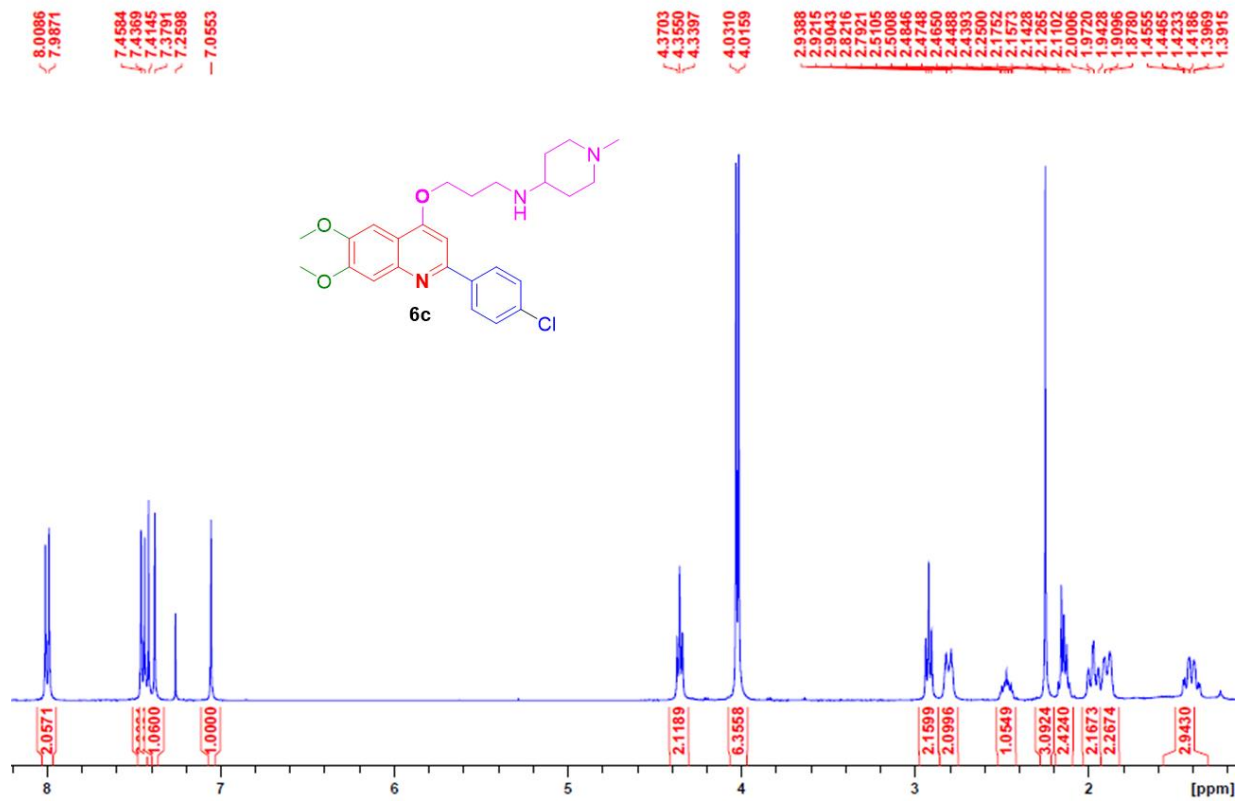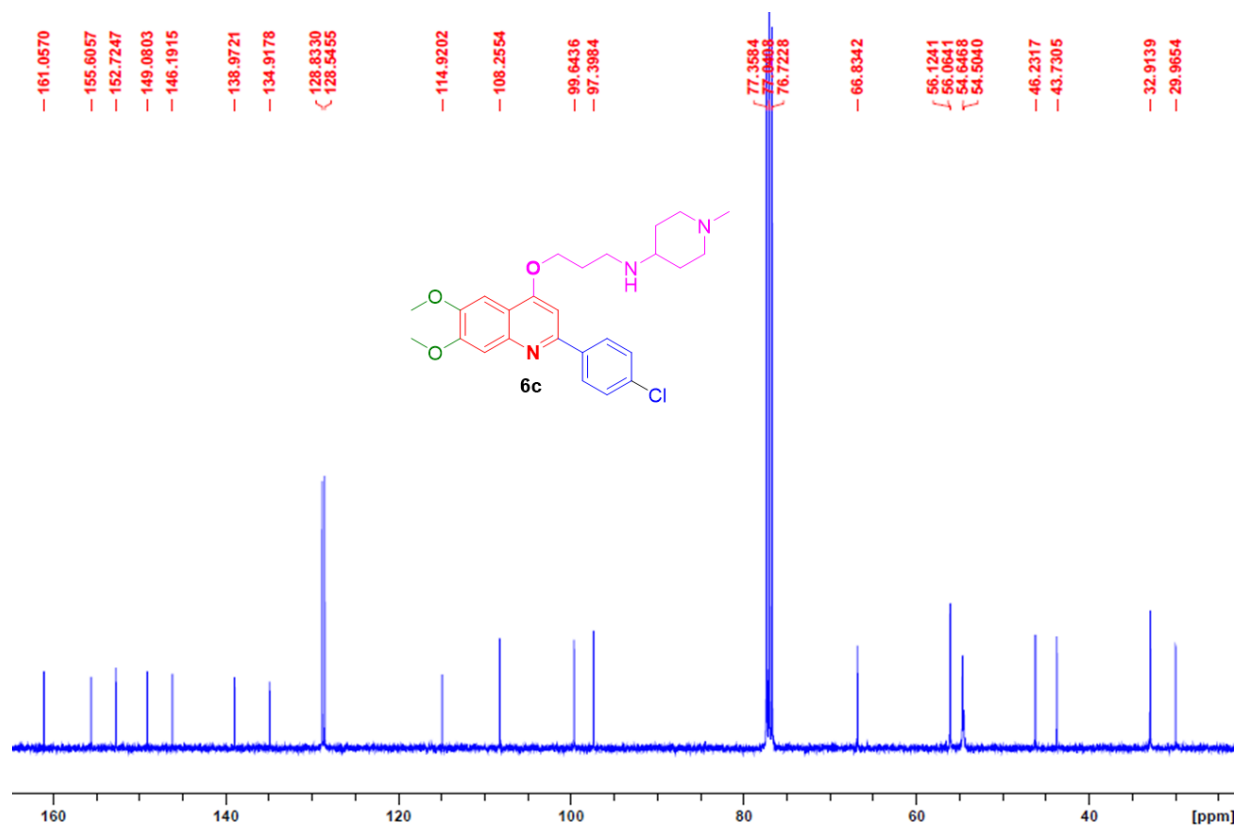

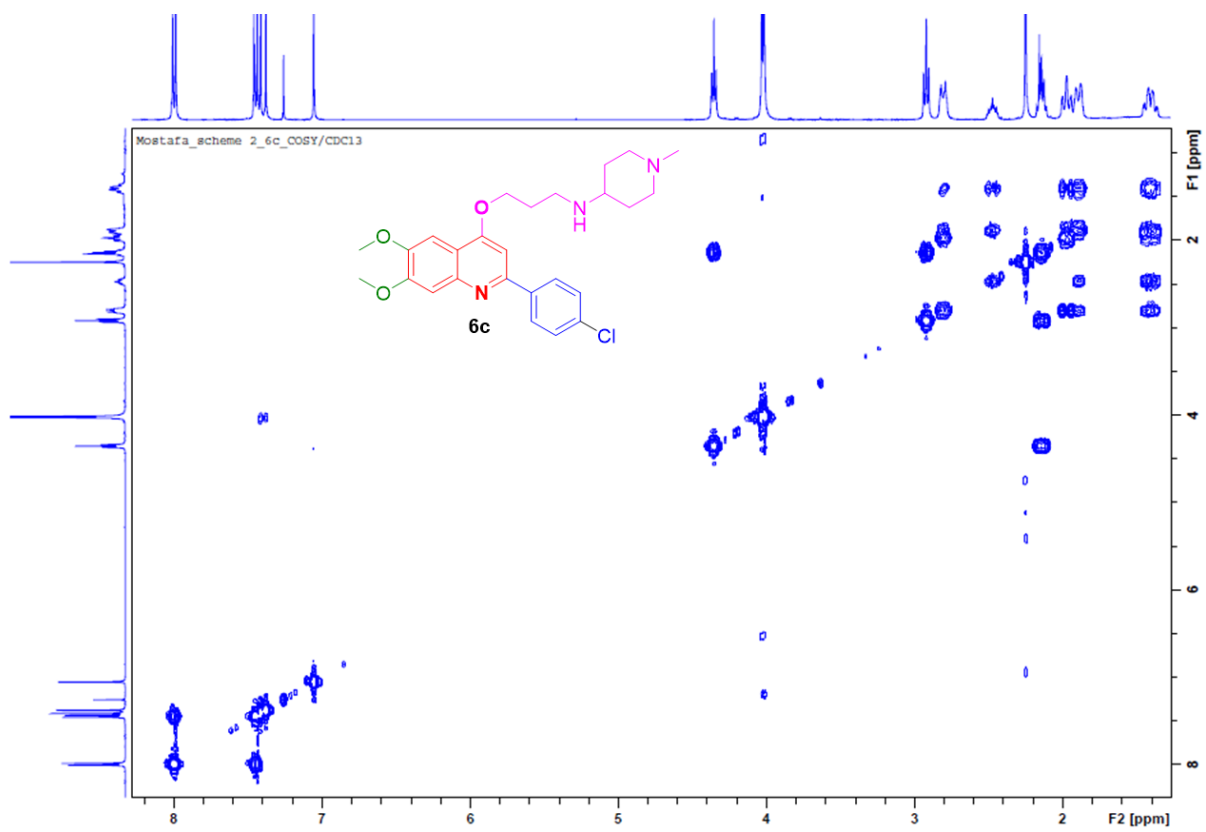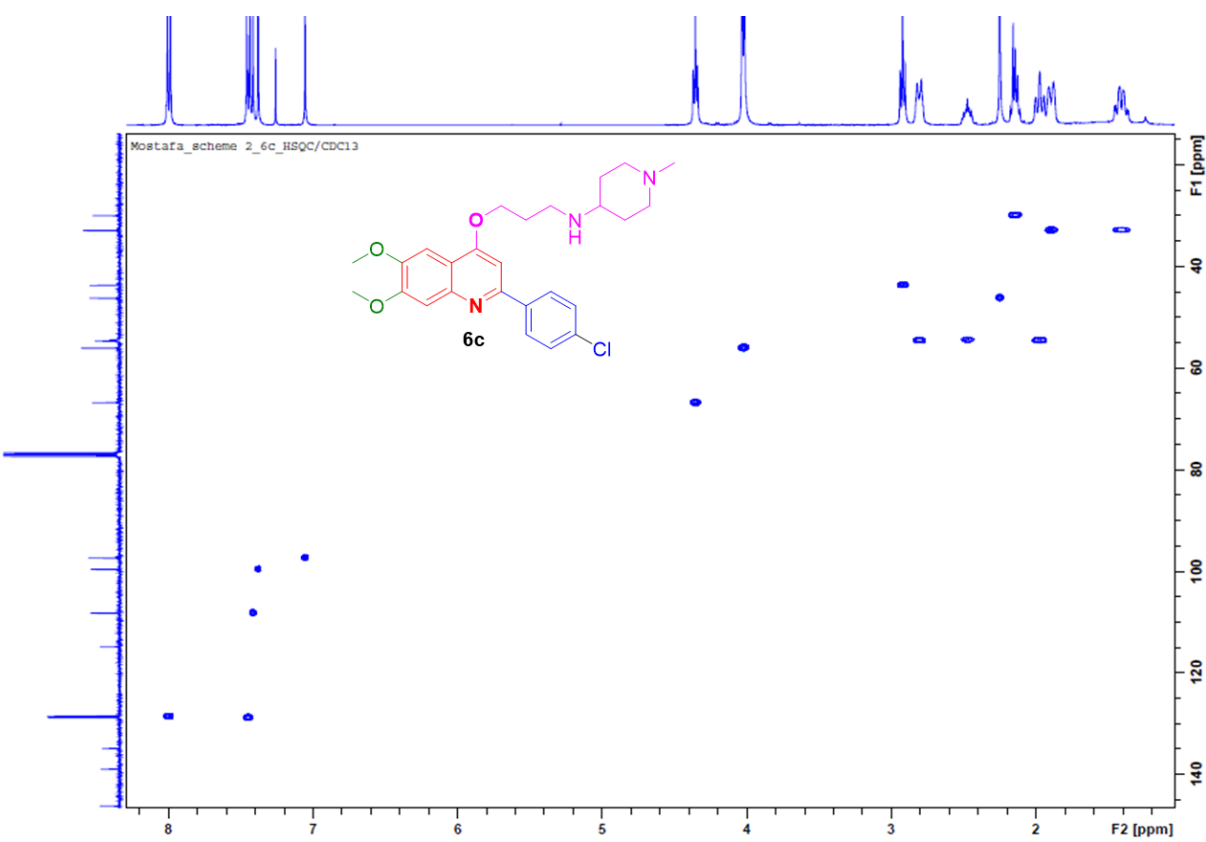

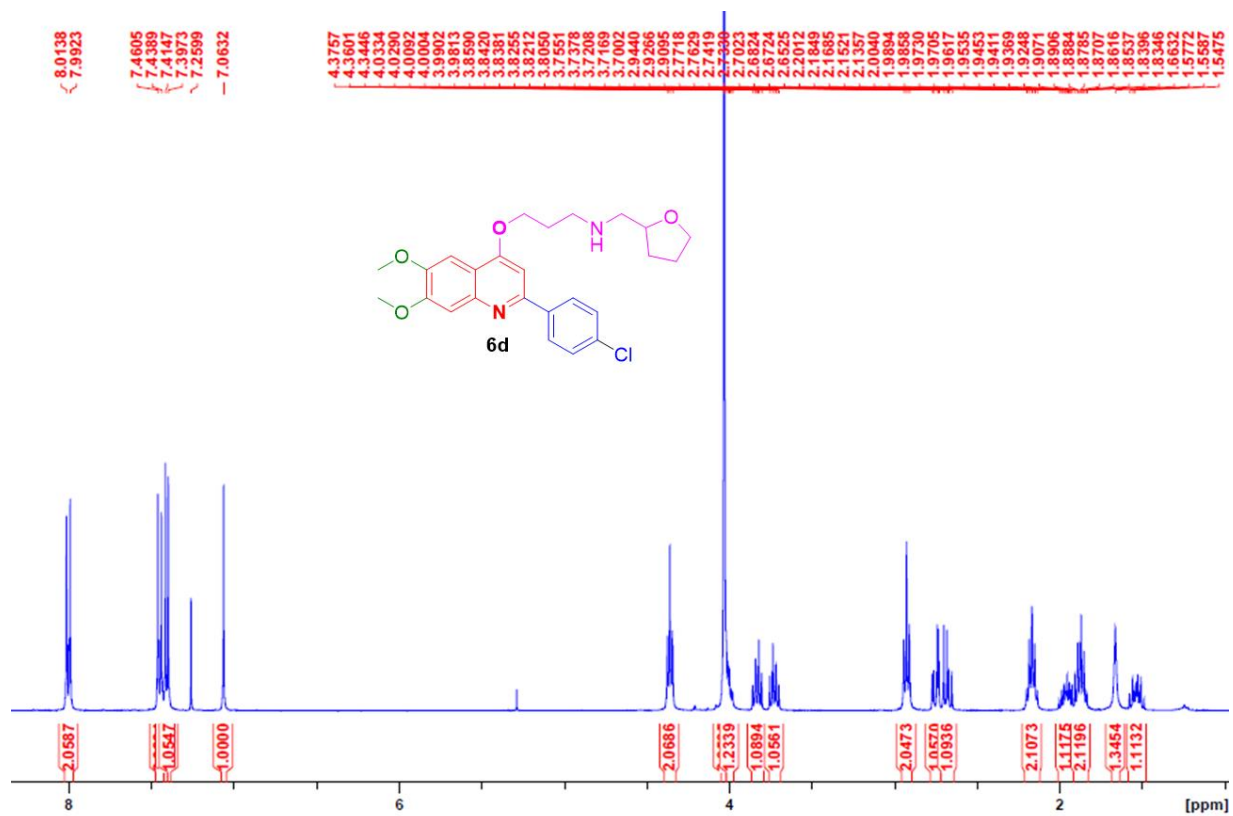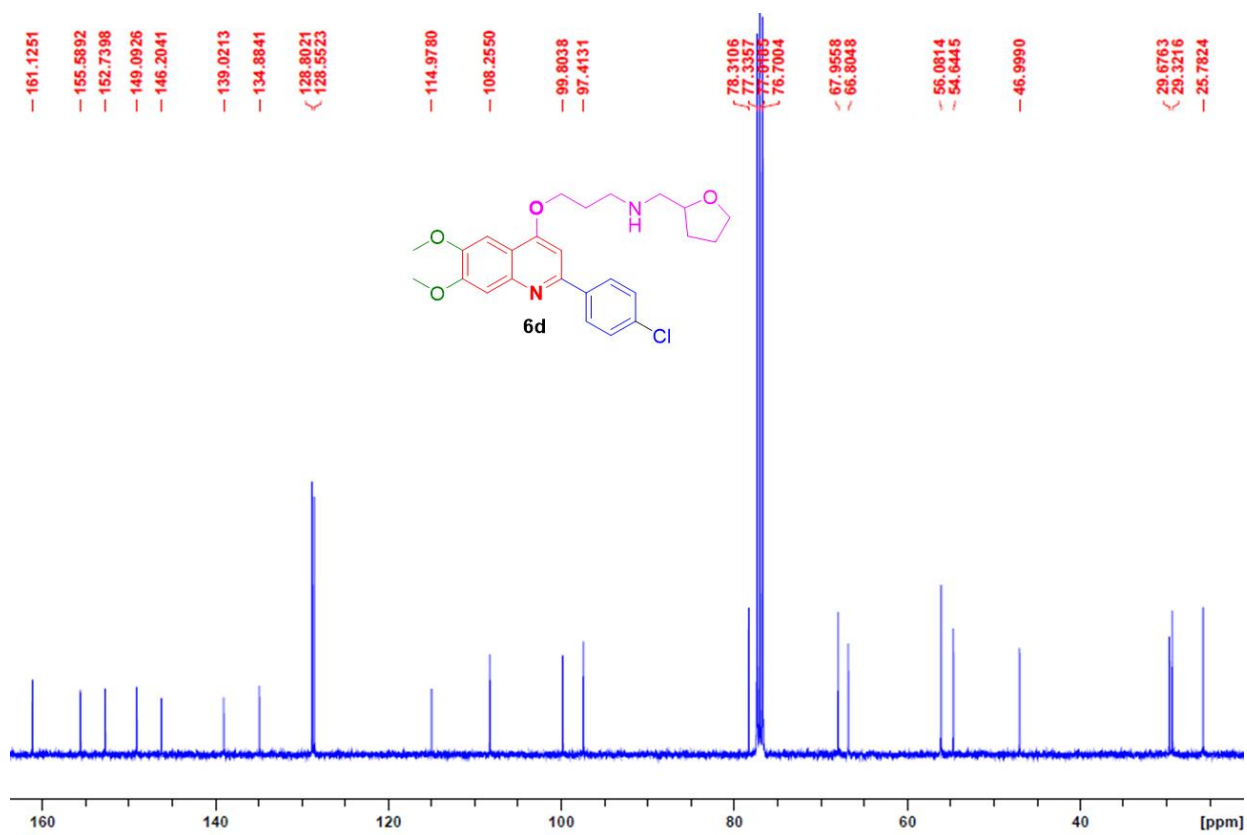

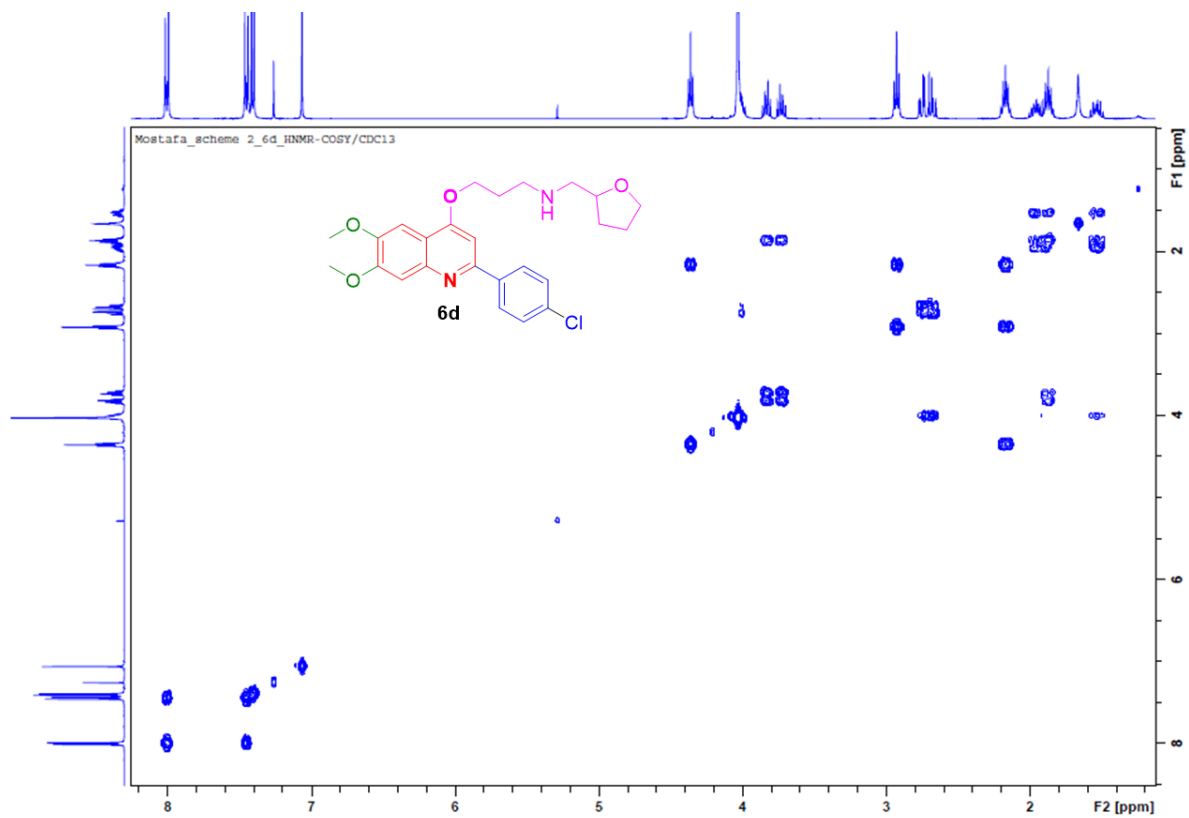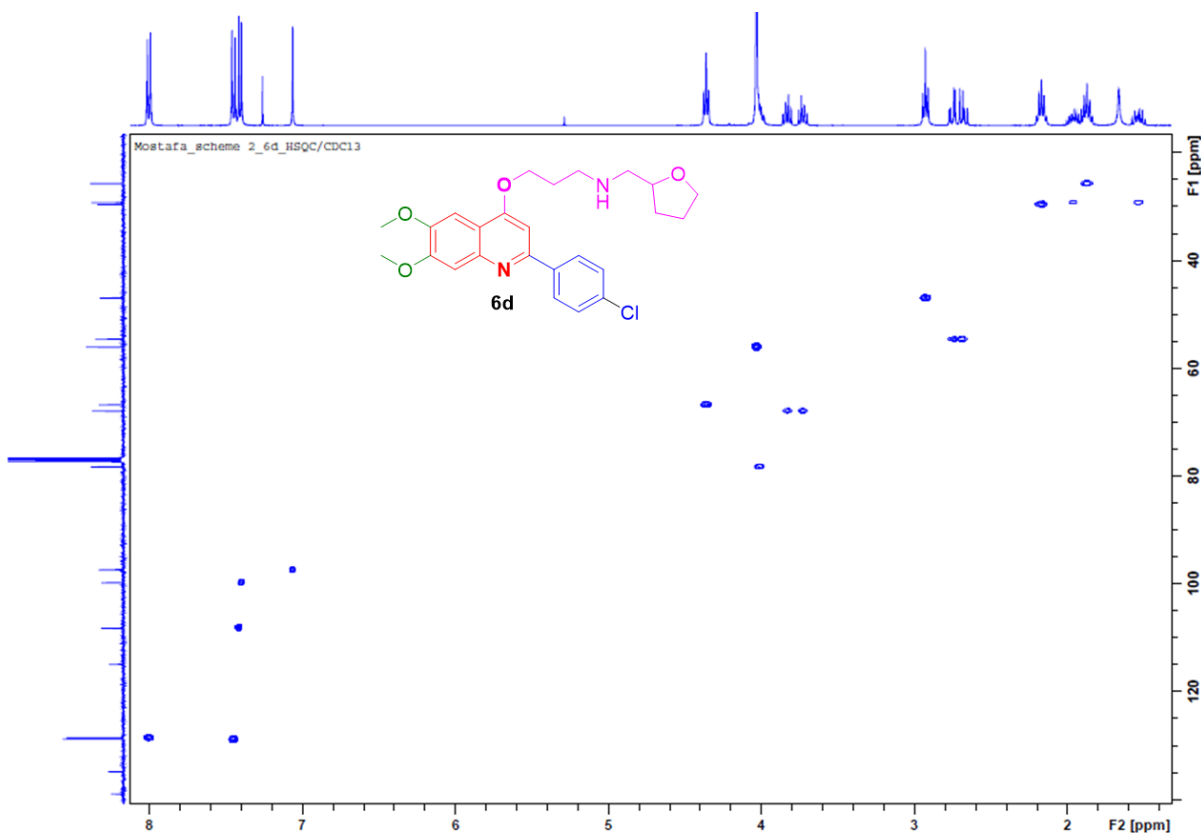

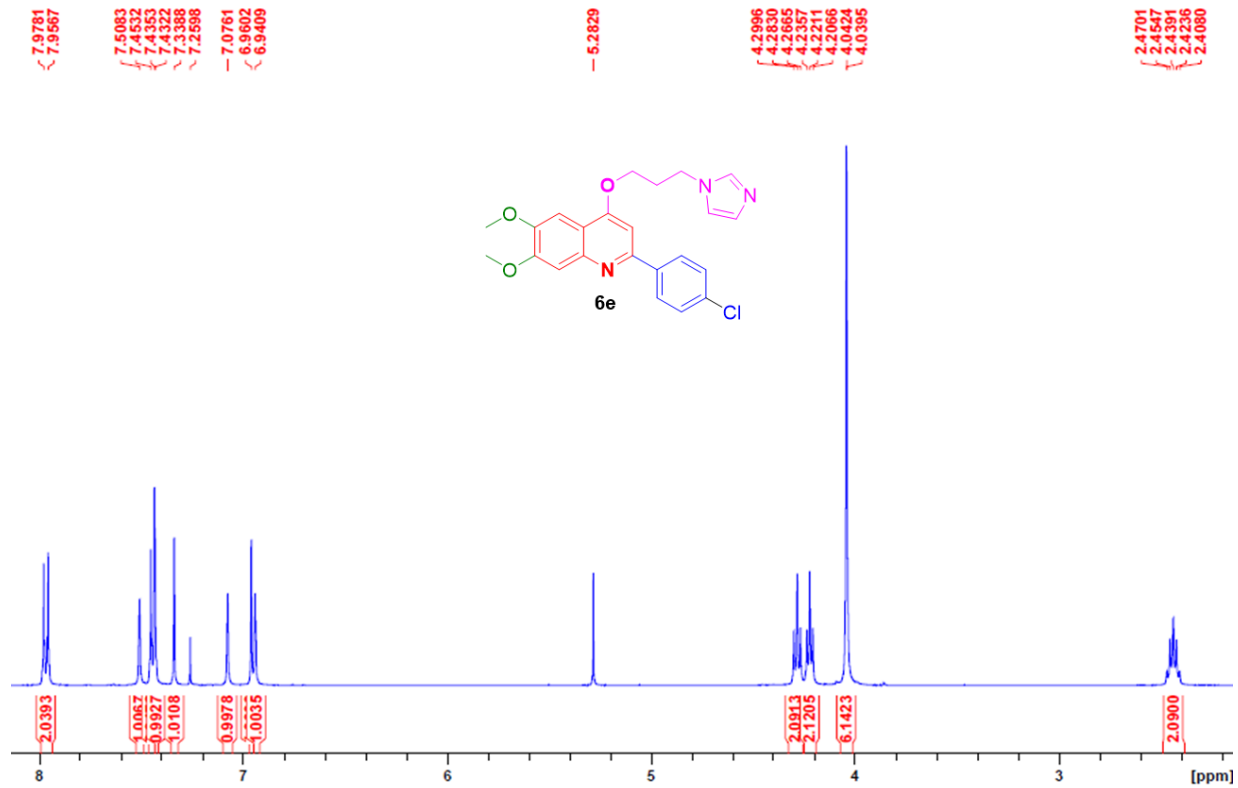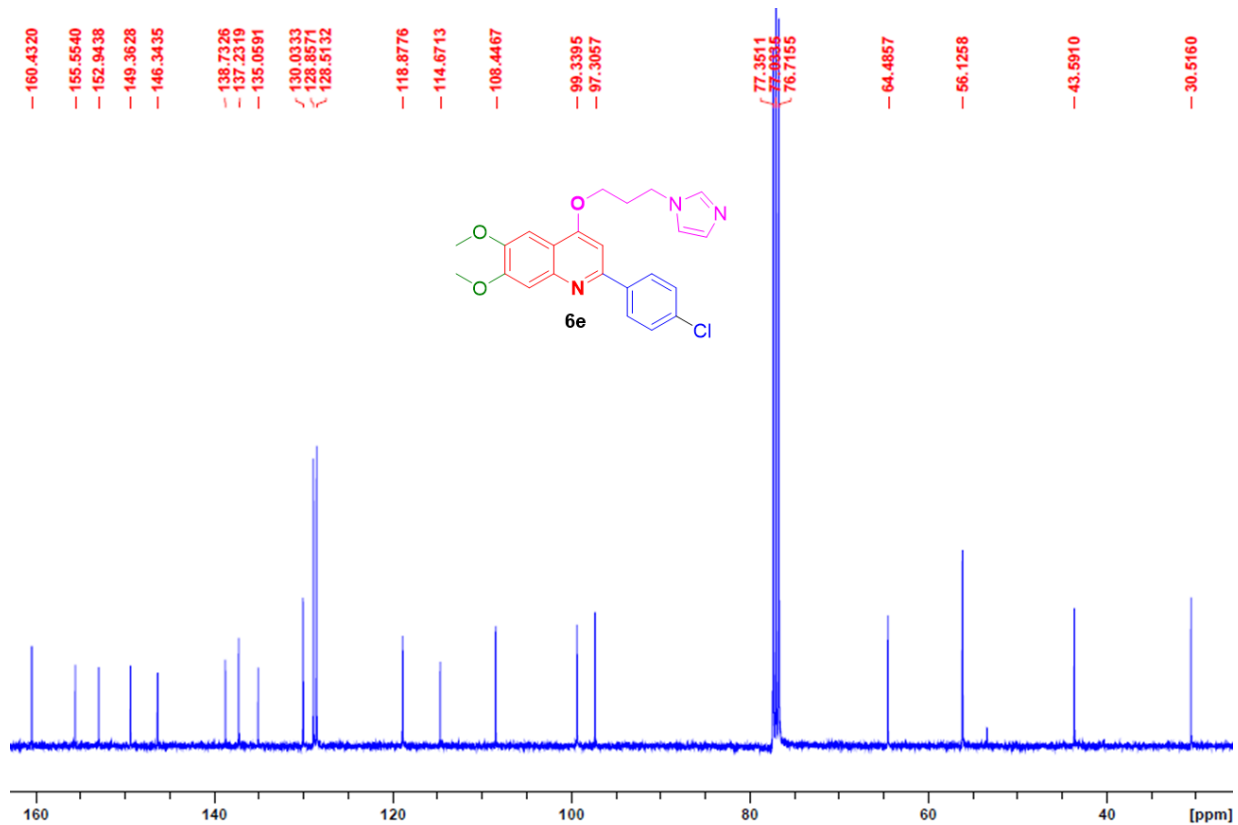

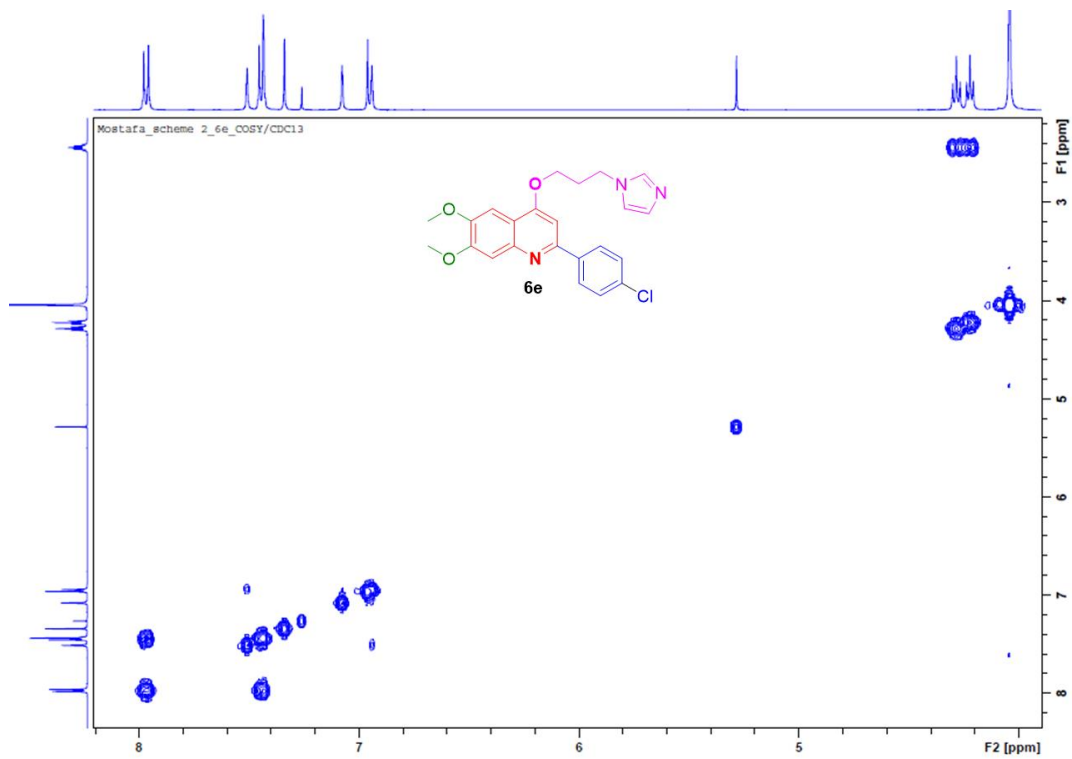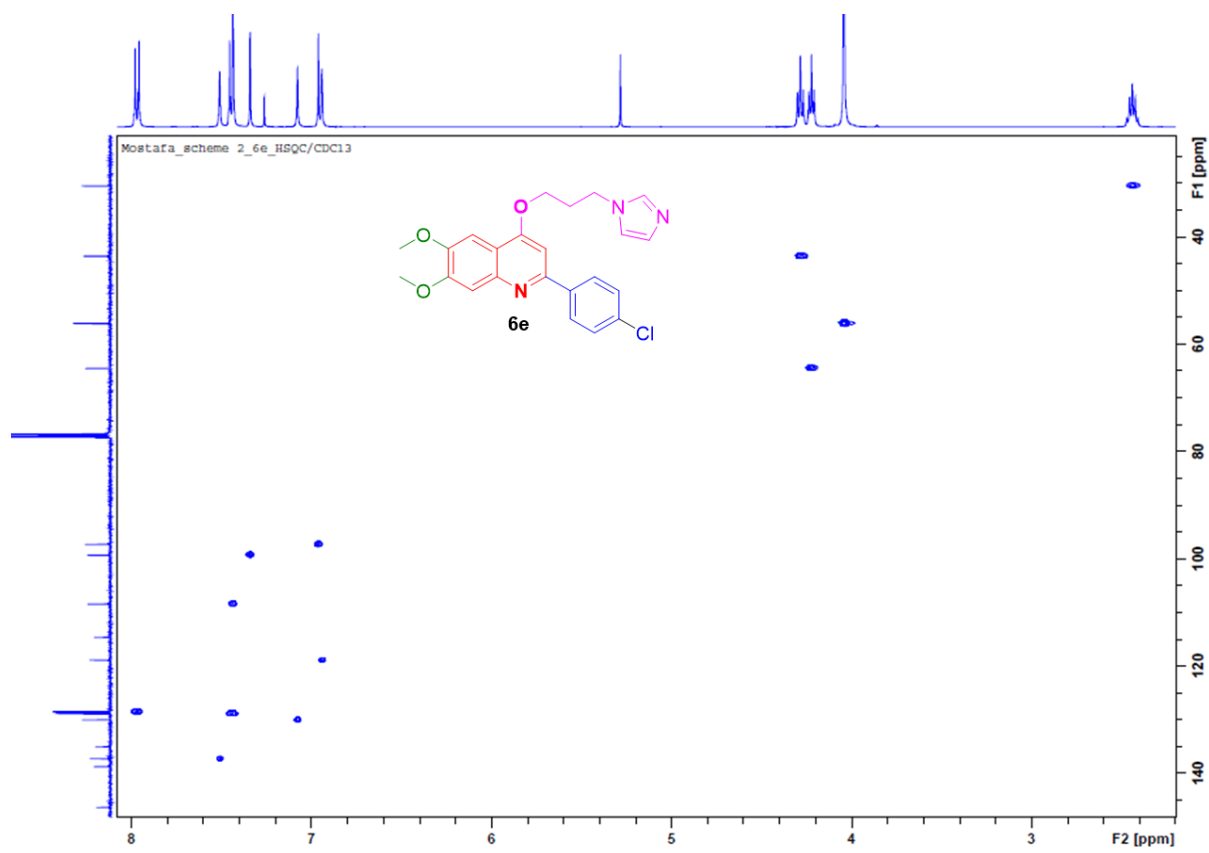

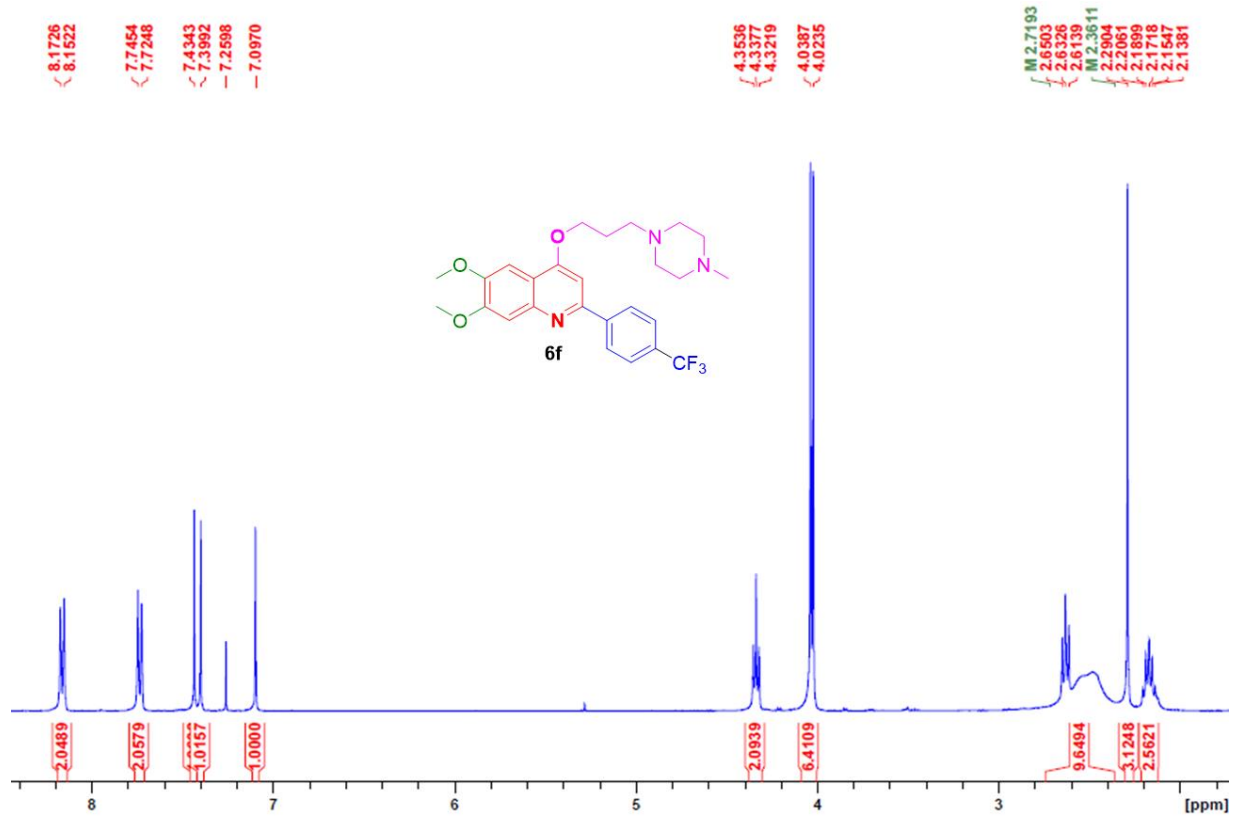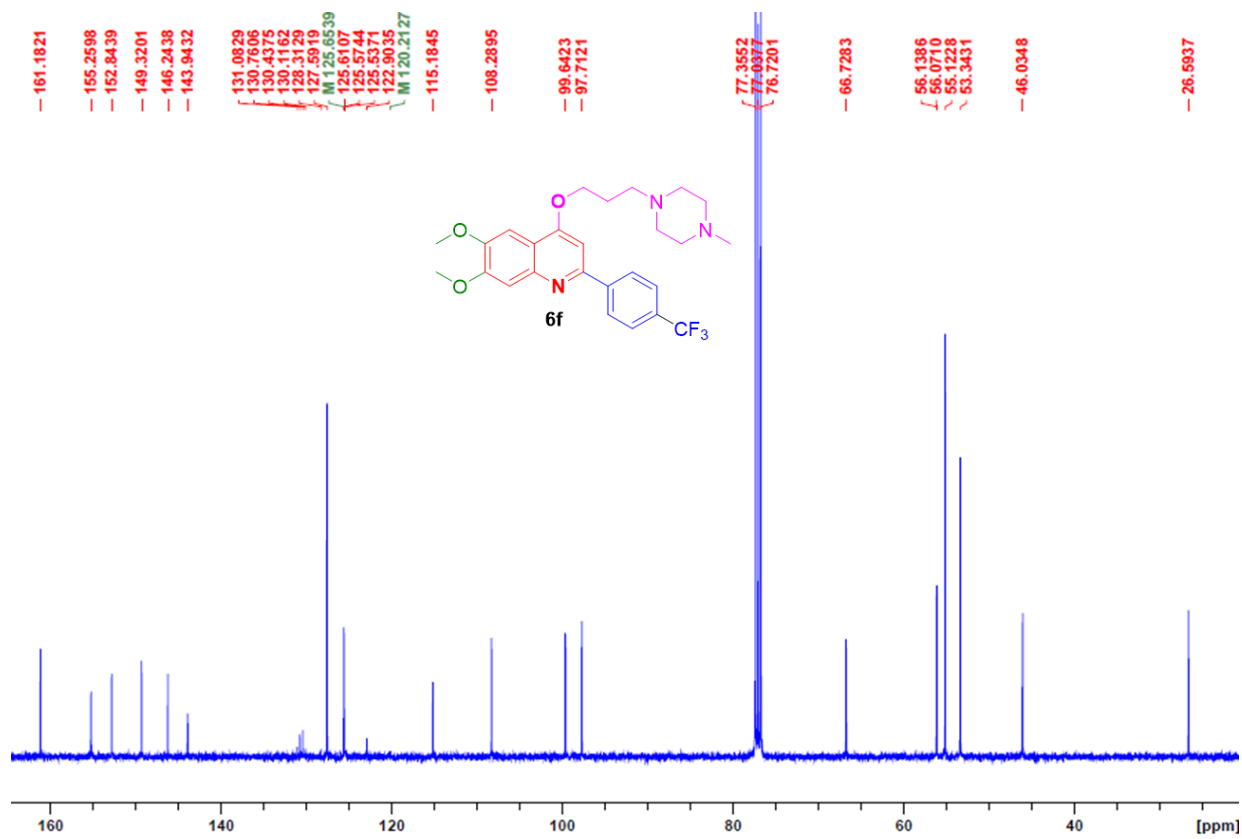



\_scheme 2\_6g\_19f/CDC13

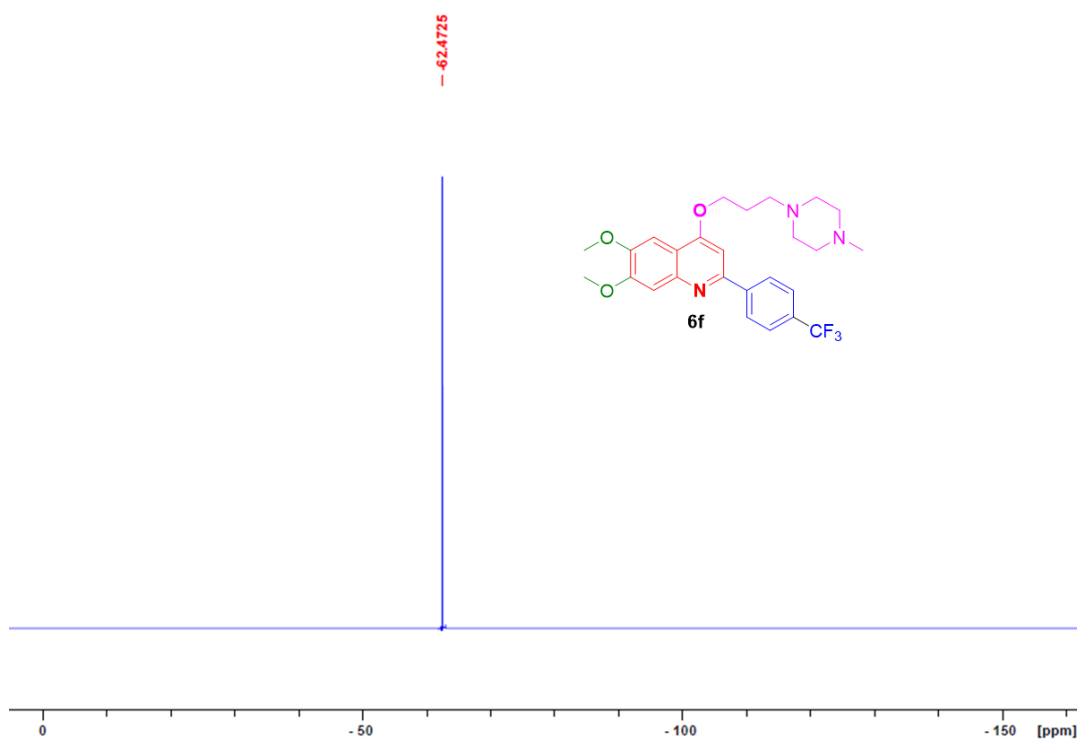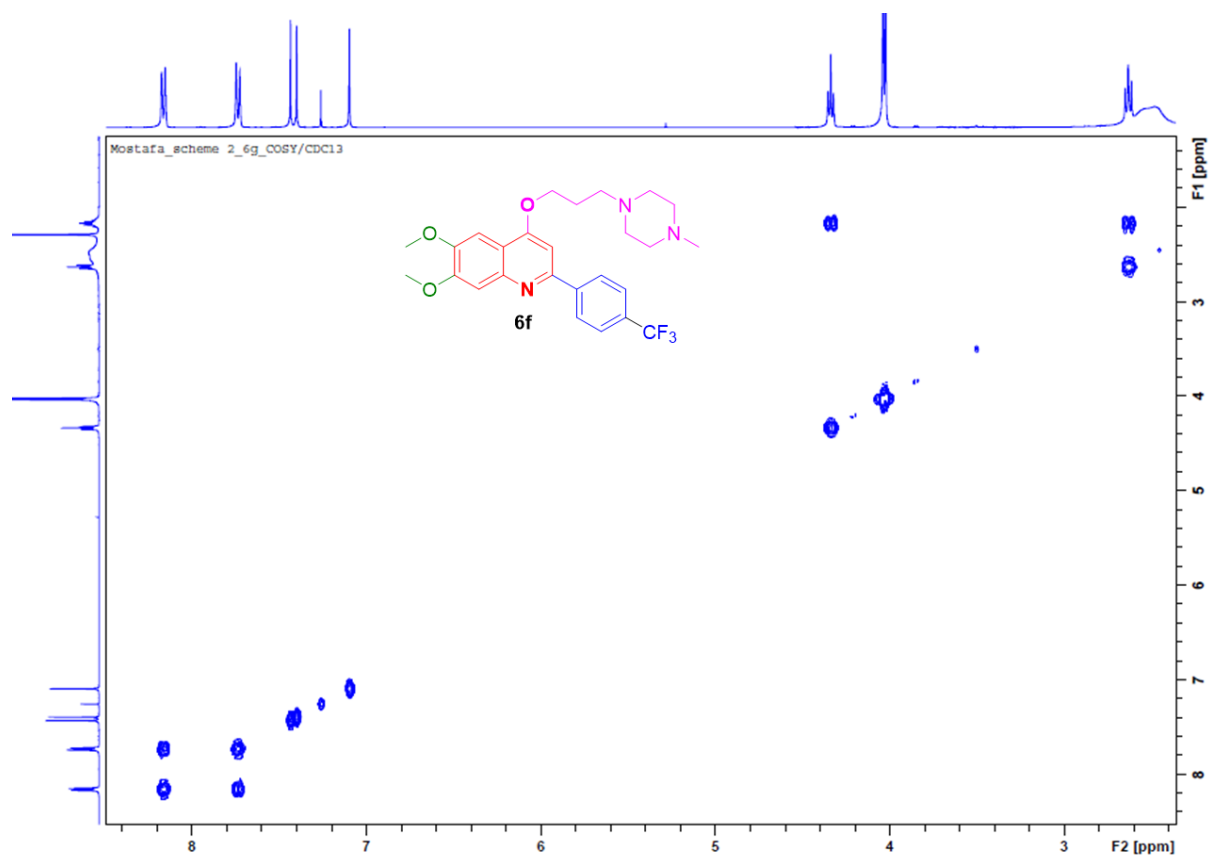

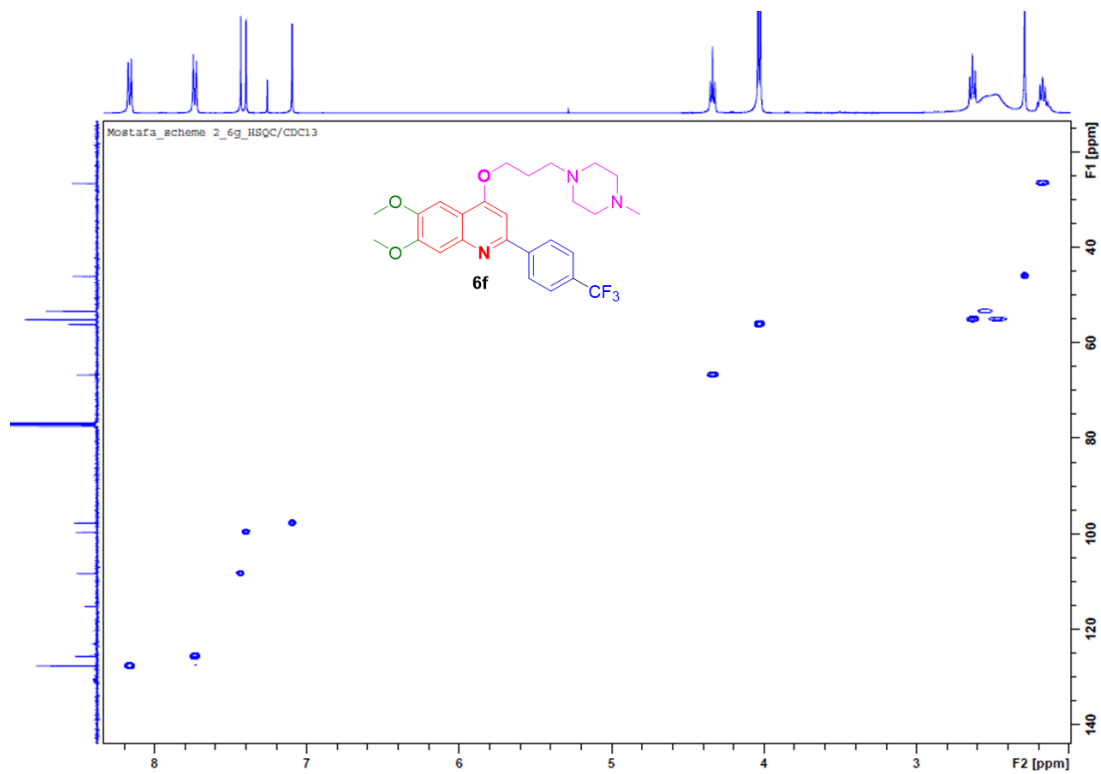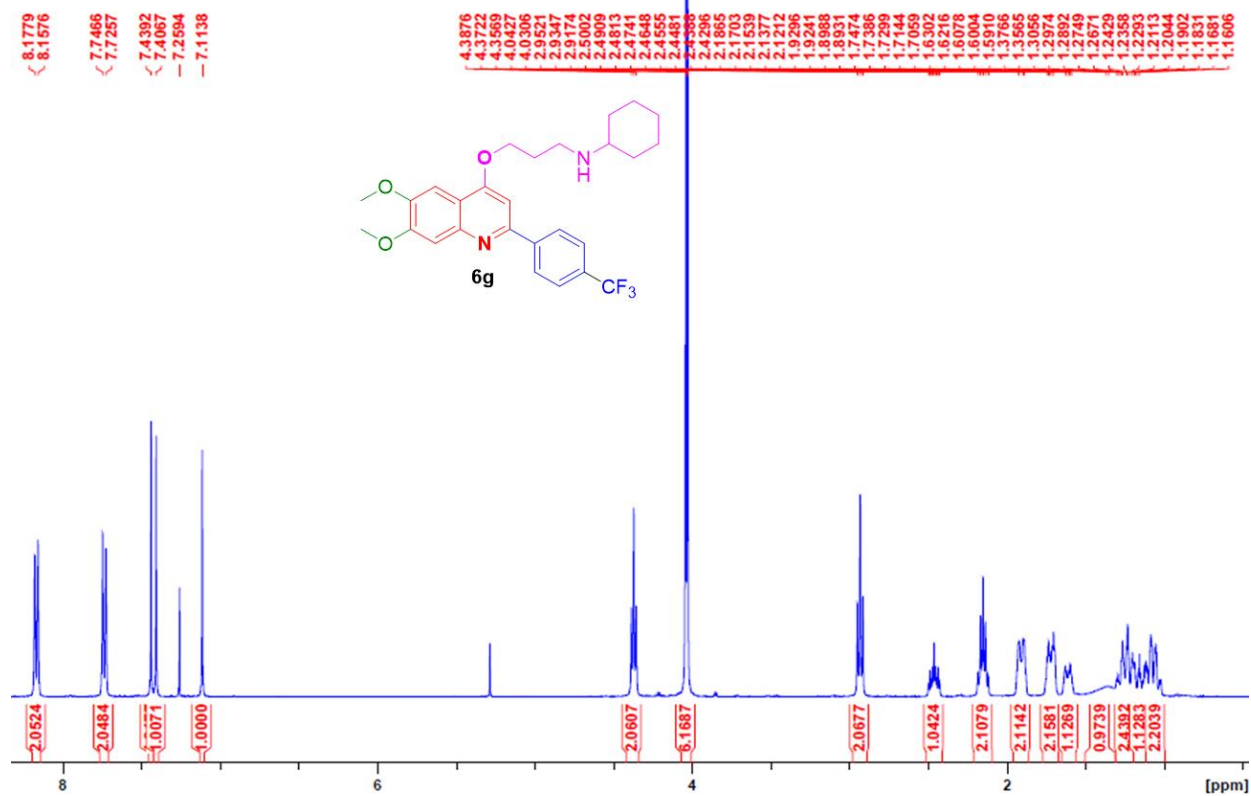

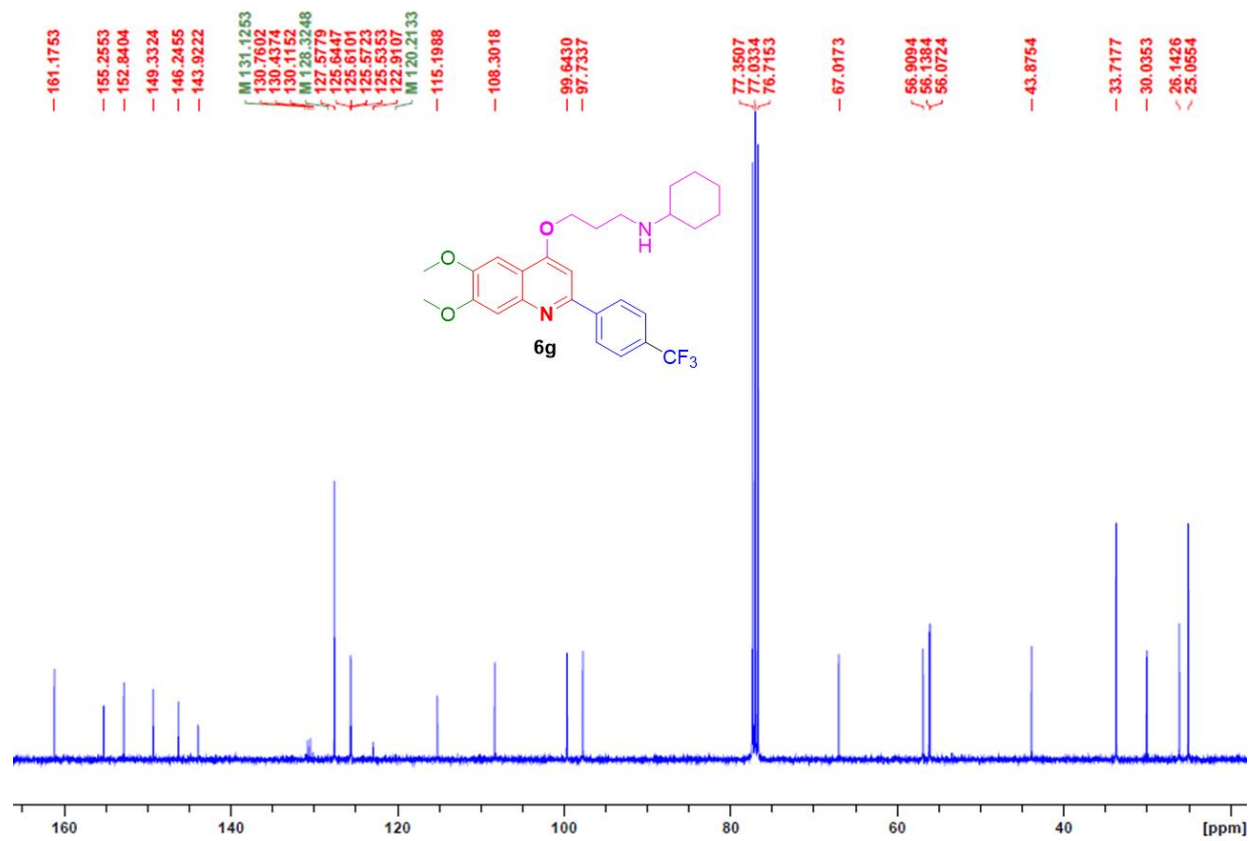

\_scheme 2\_6h\_19F/CDCl3

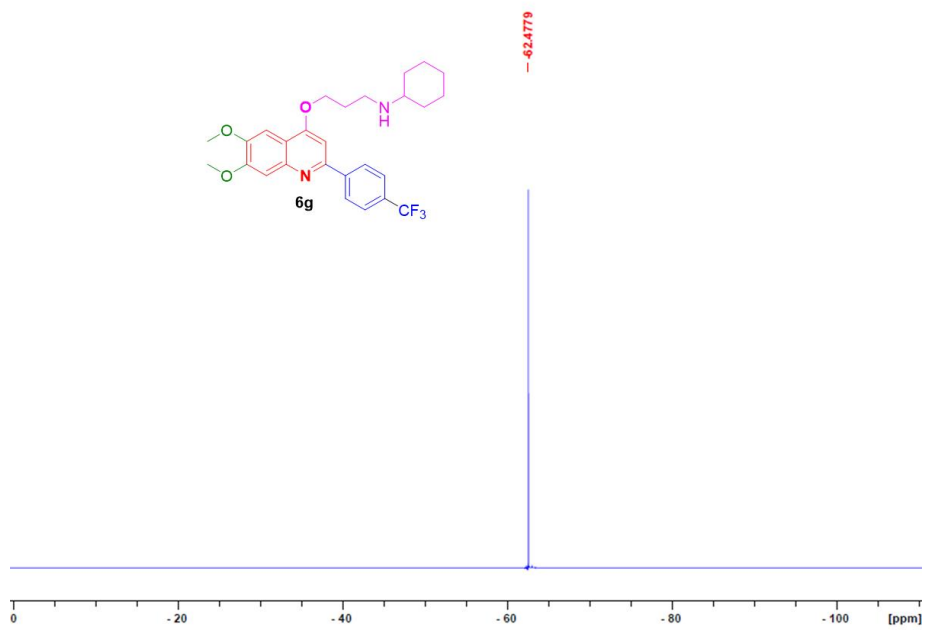

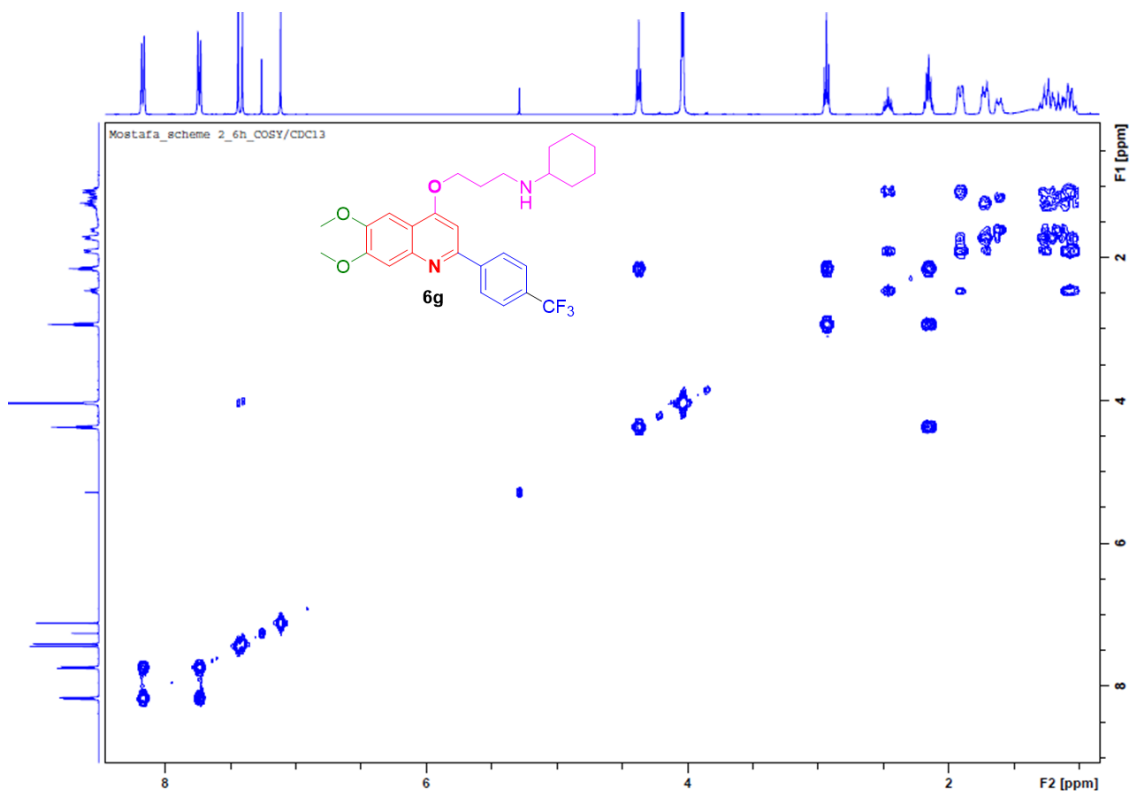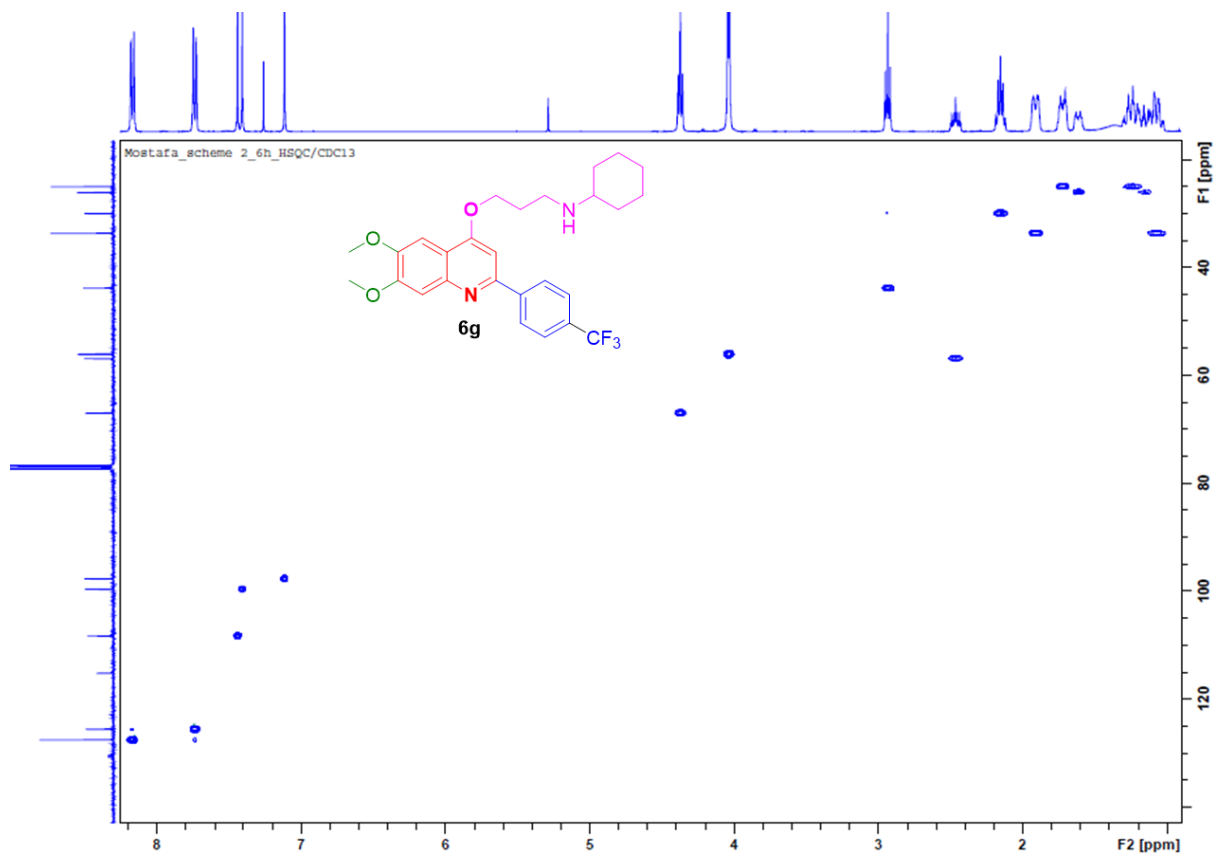

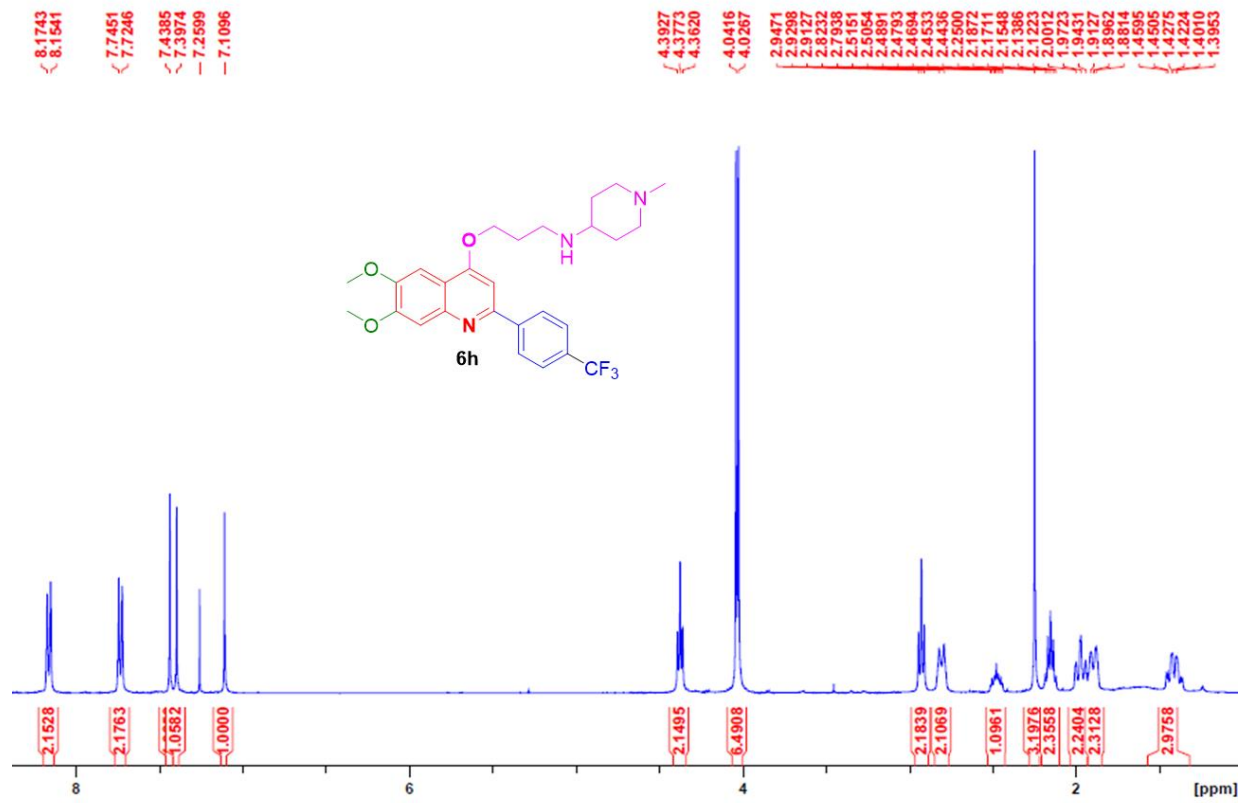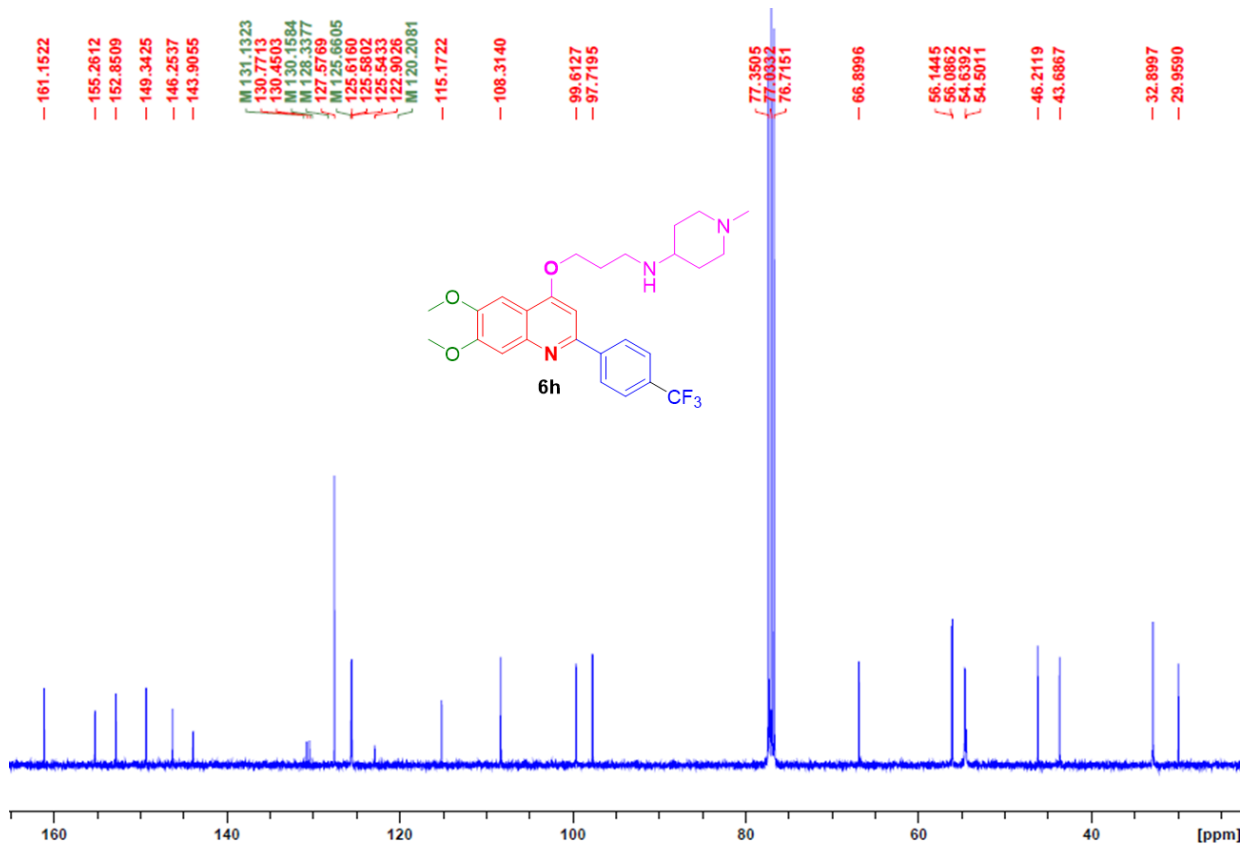

\_19F/CDC13

-62.4760

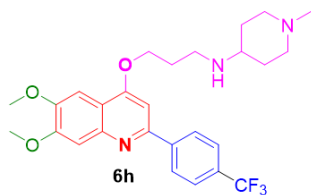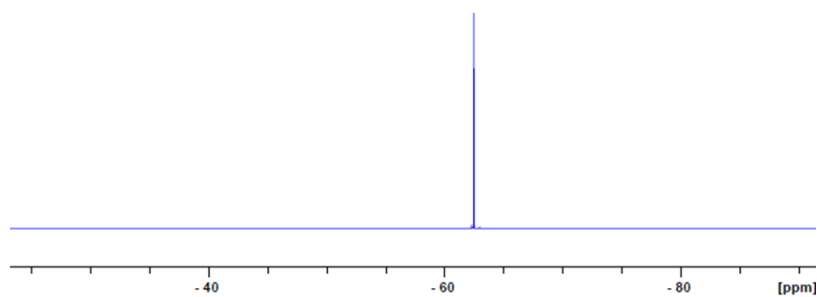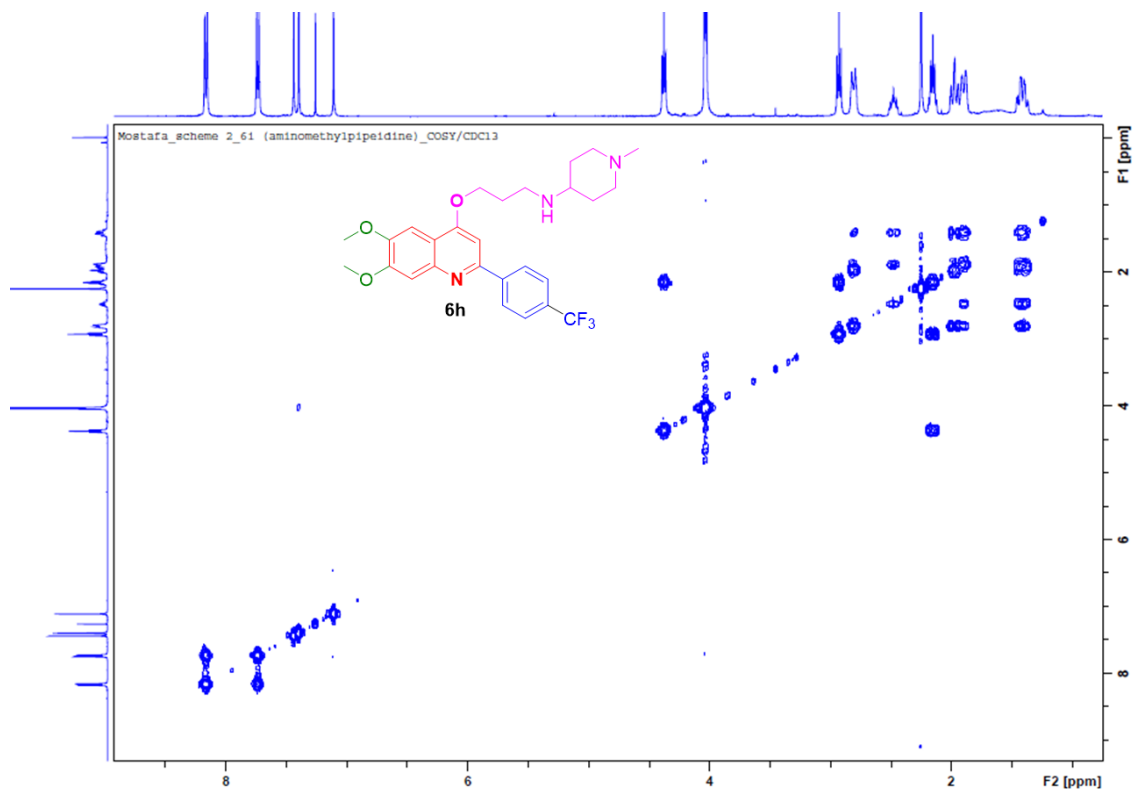

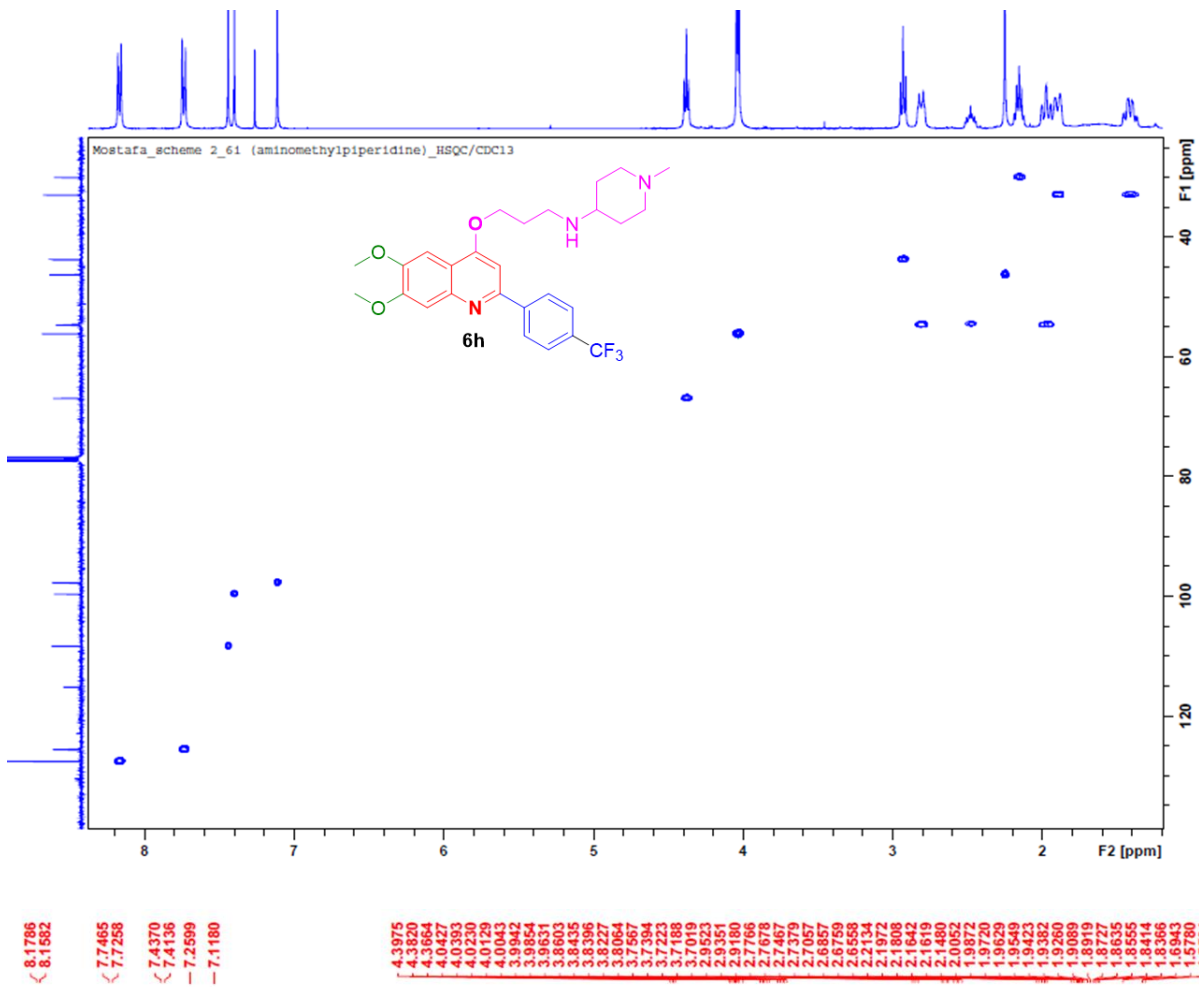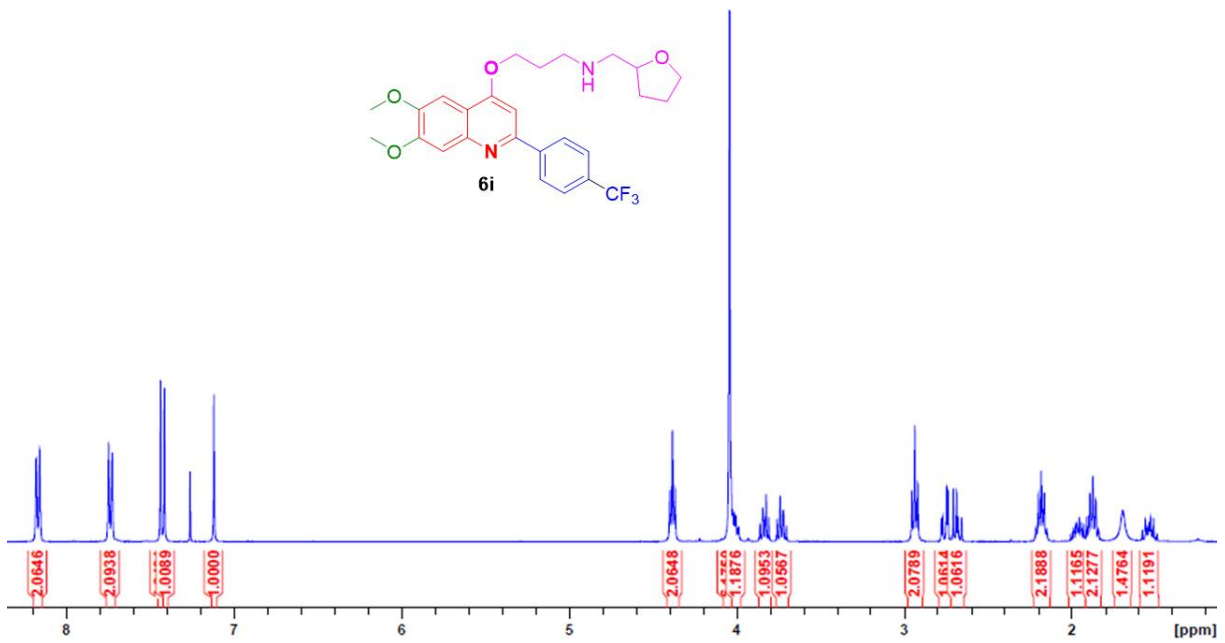

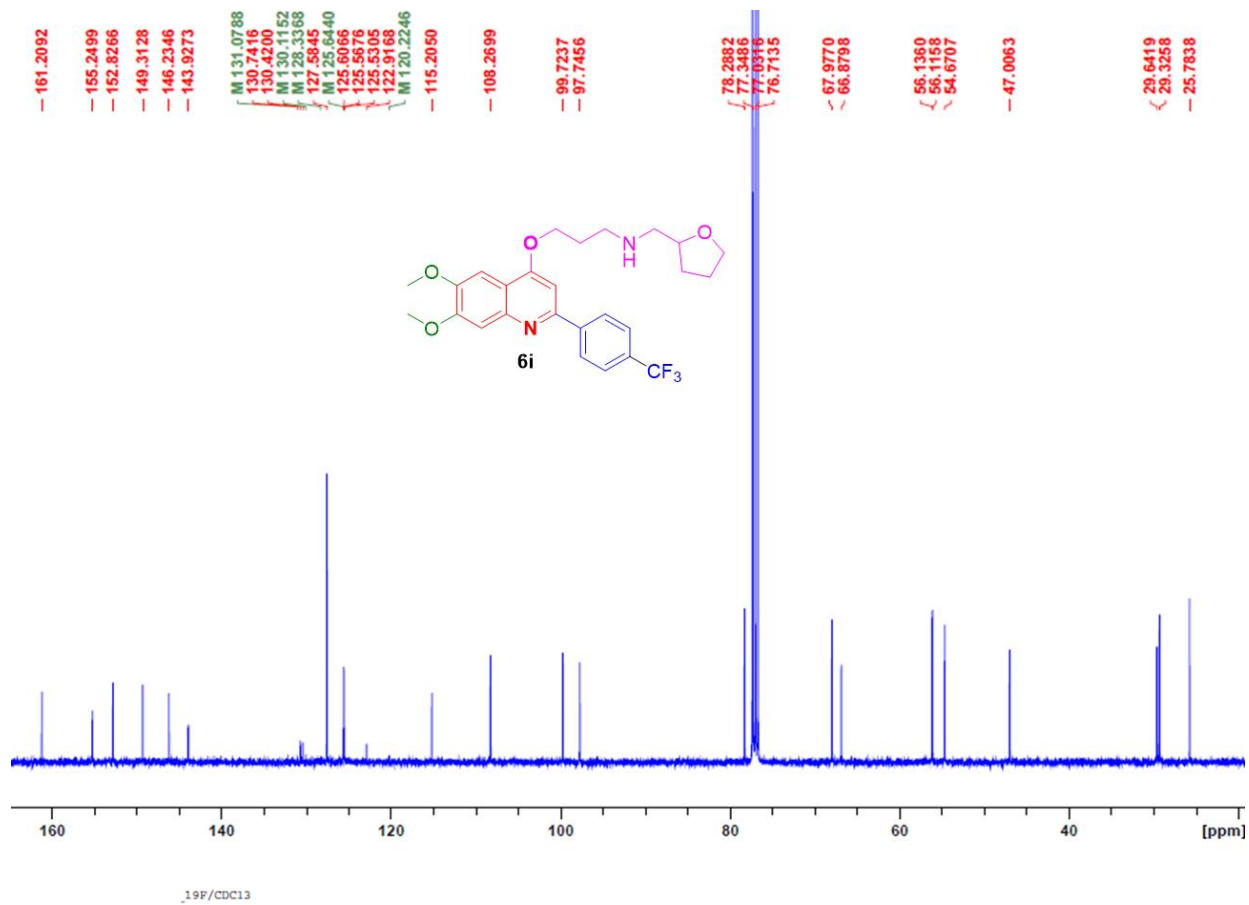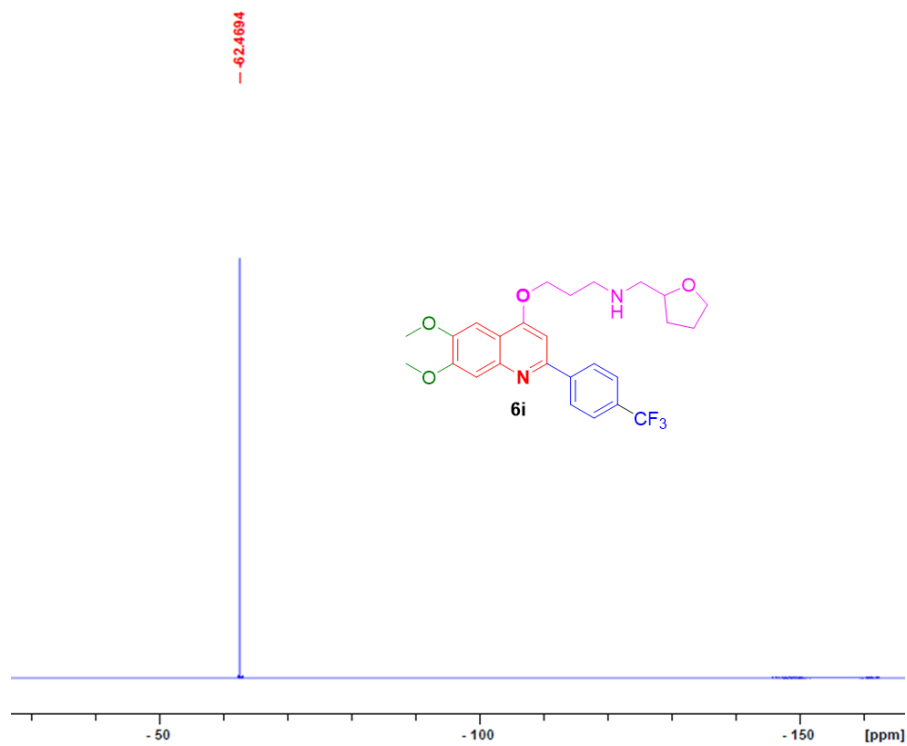



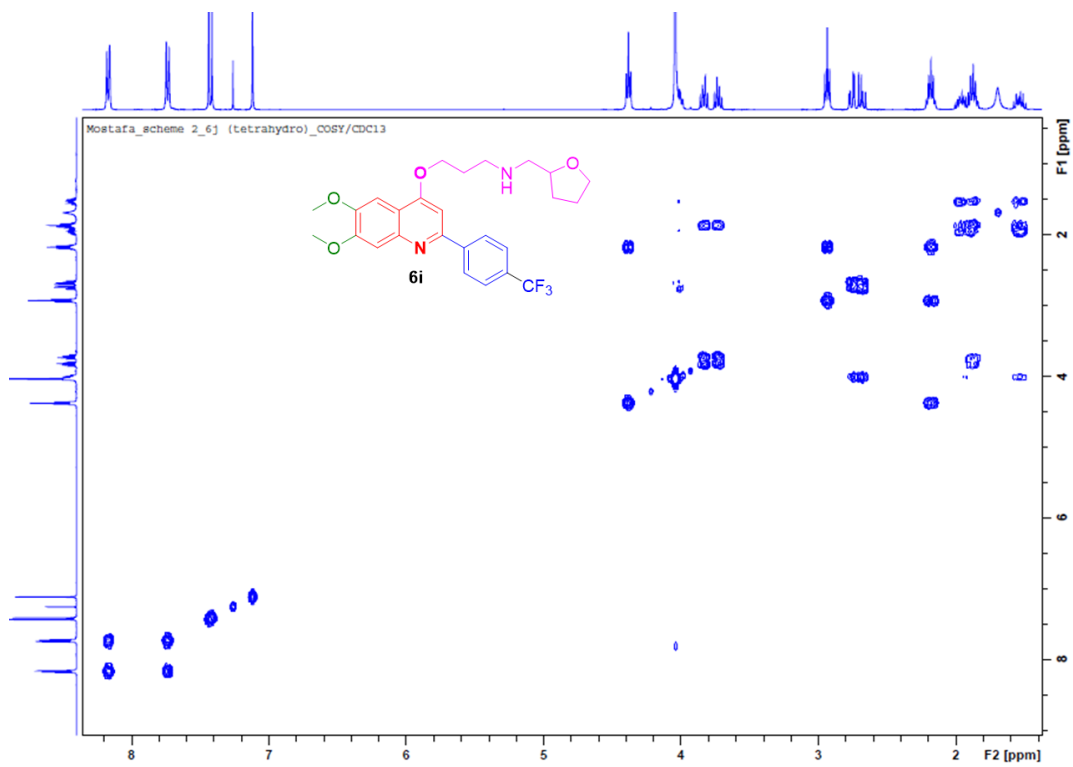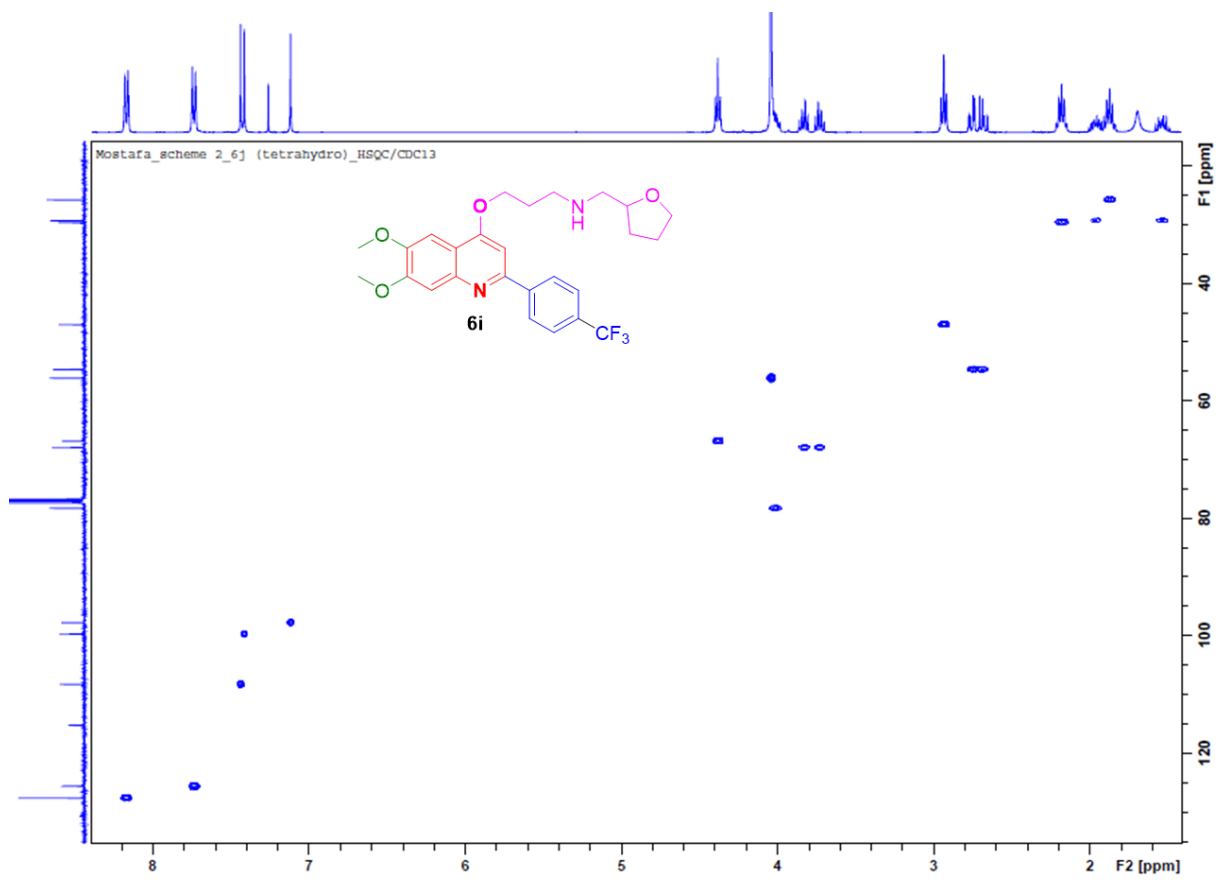

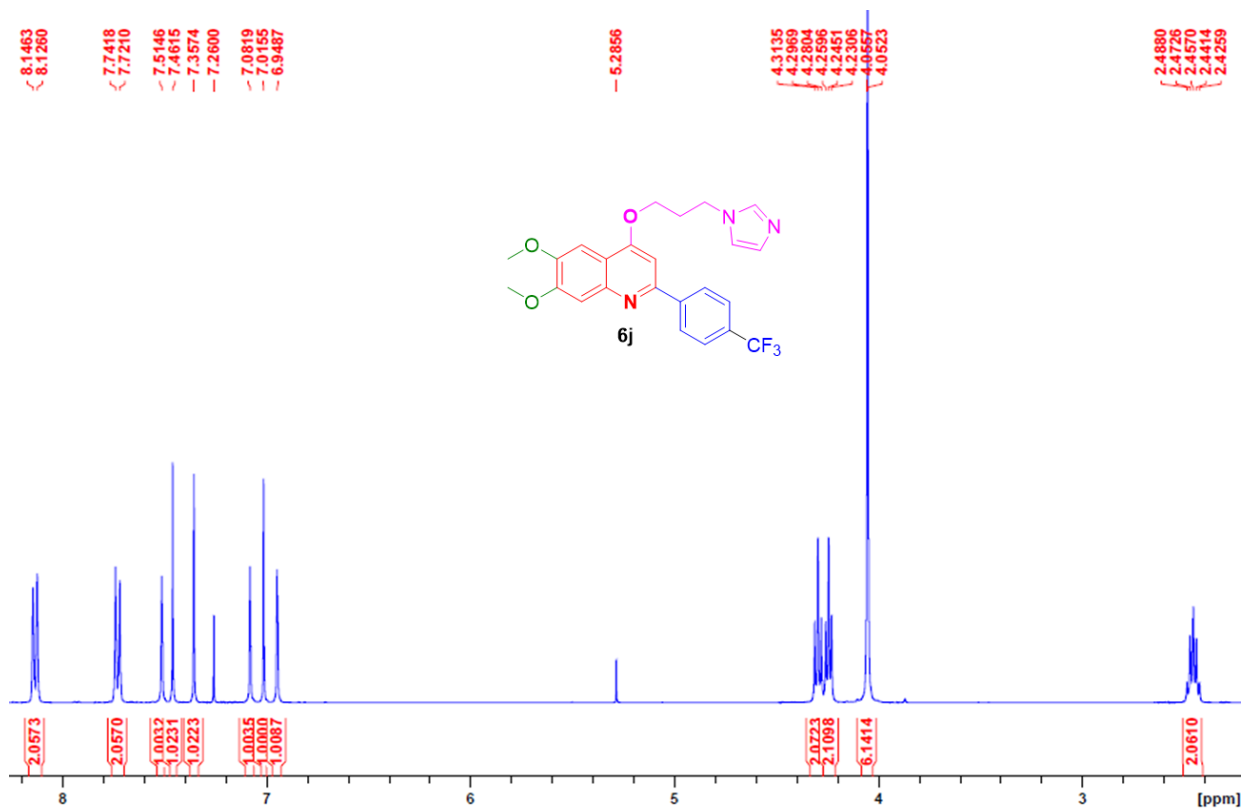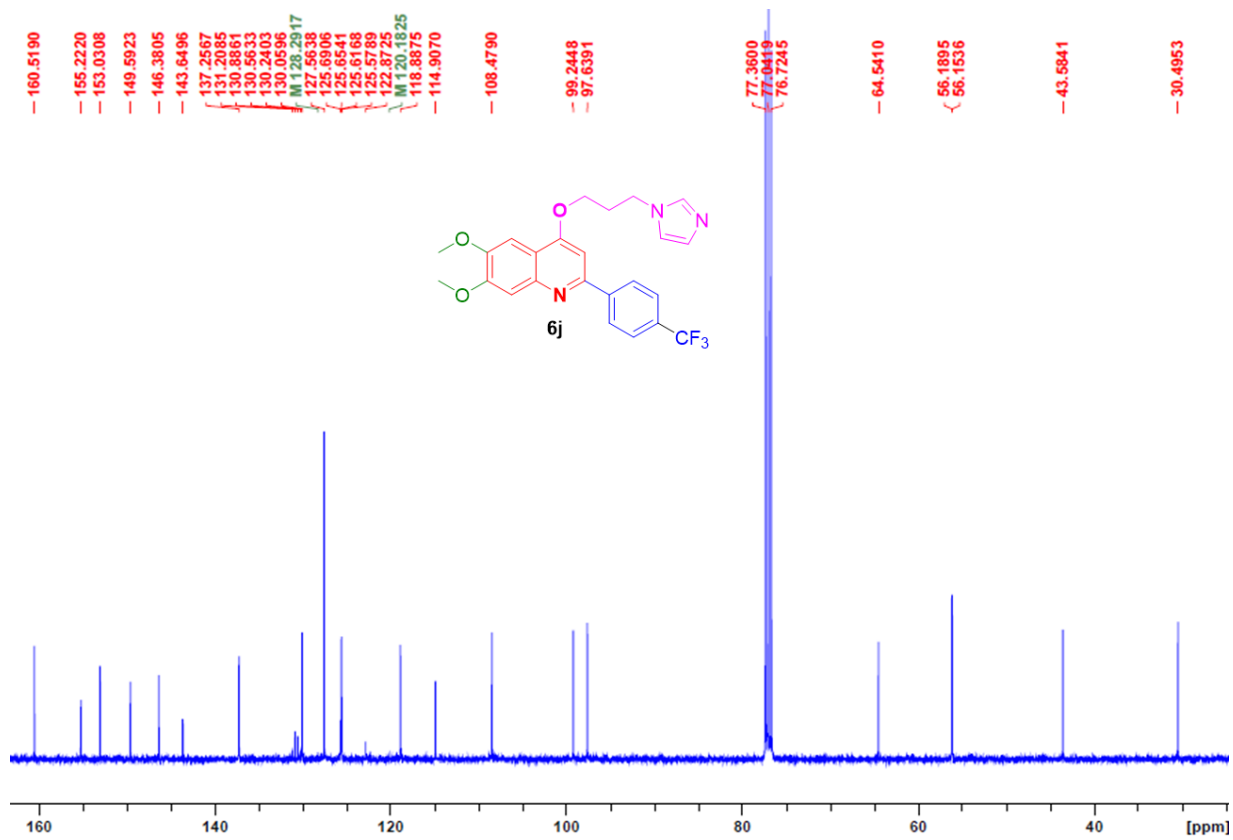

\_19F/CDC13

-42.4896

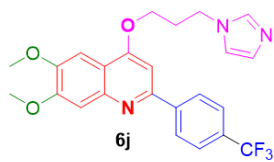

-50 -100 -150 [ppm]

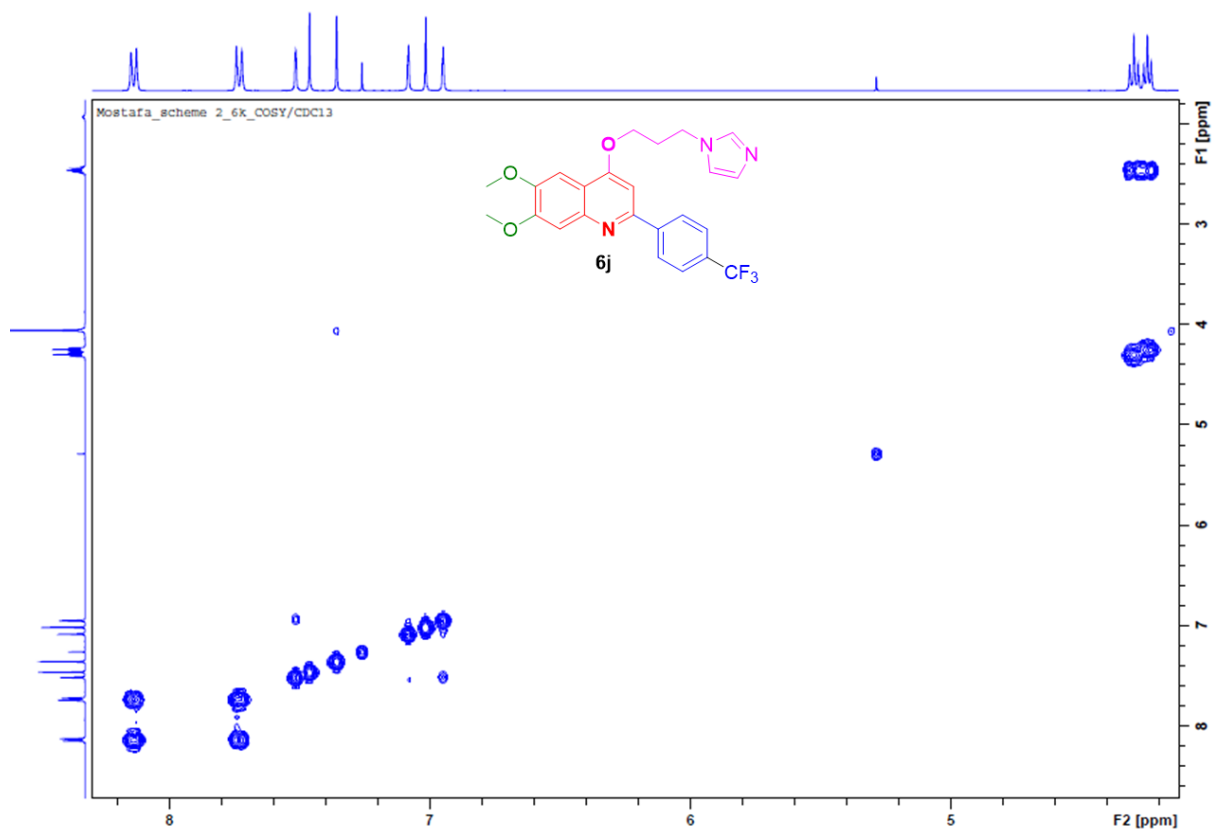

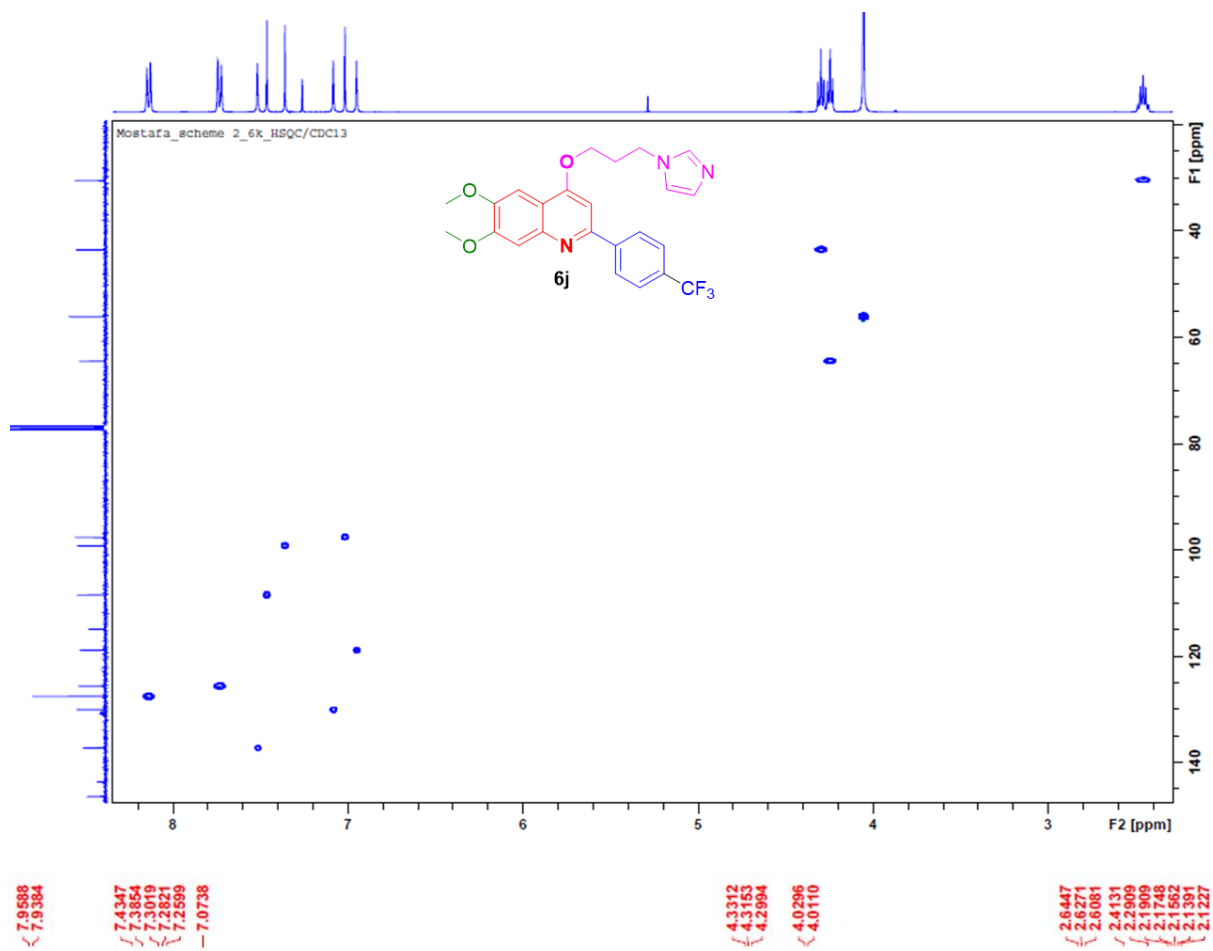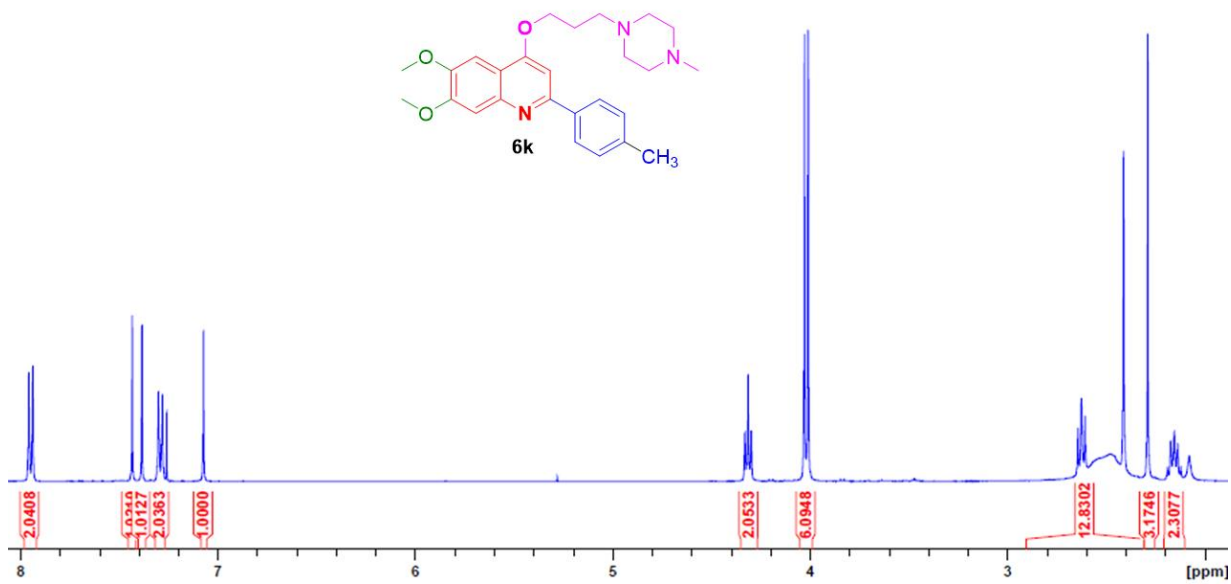

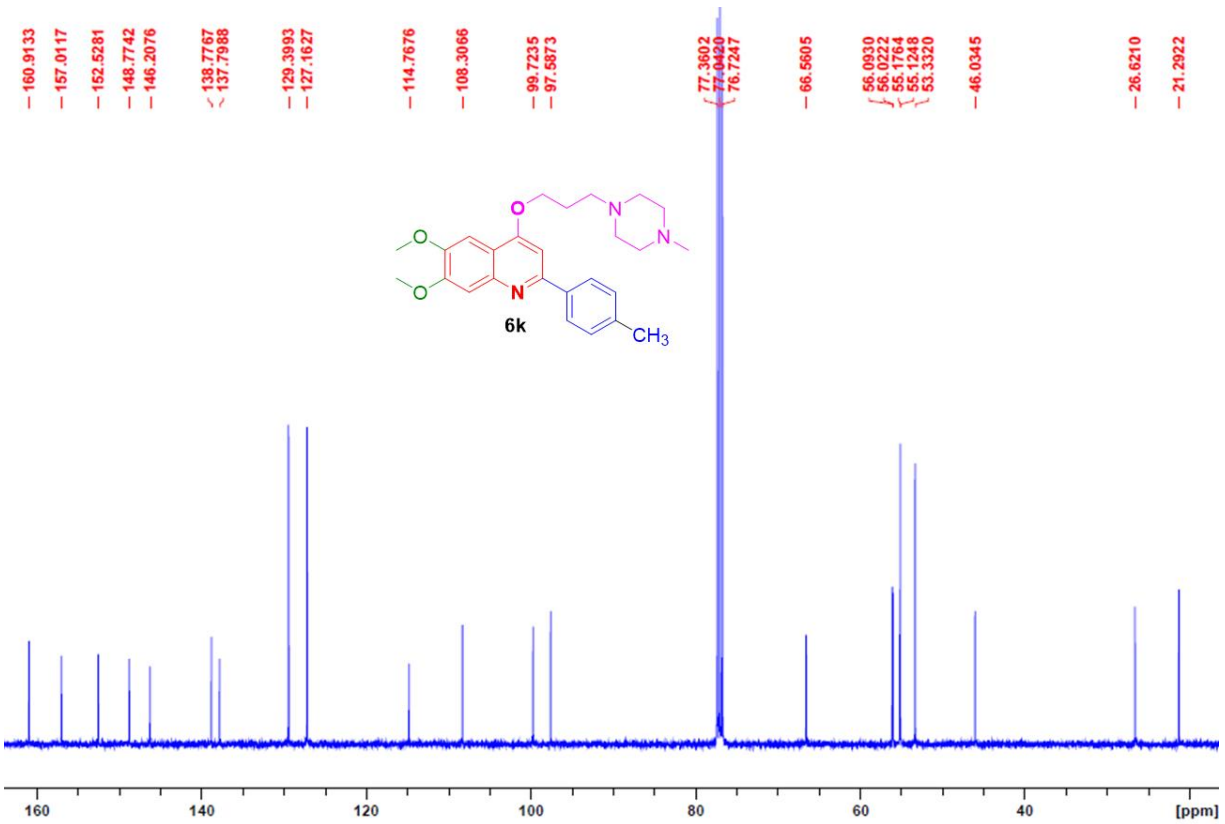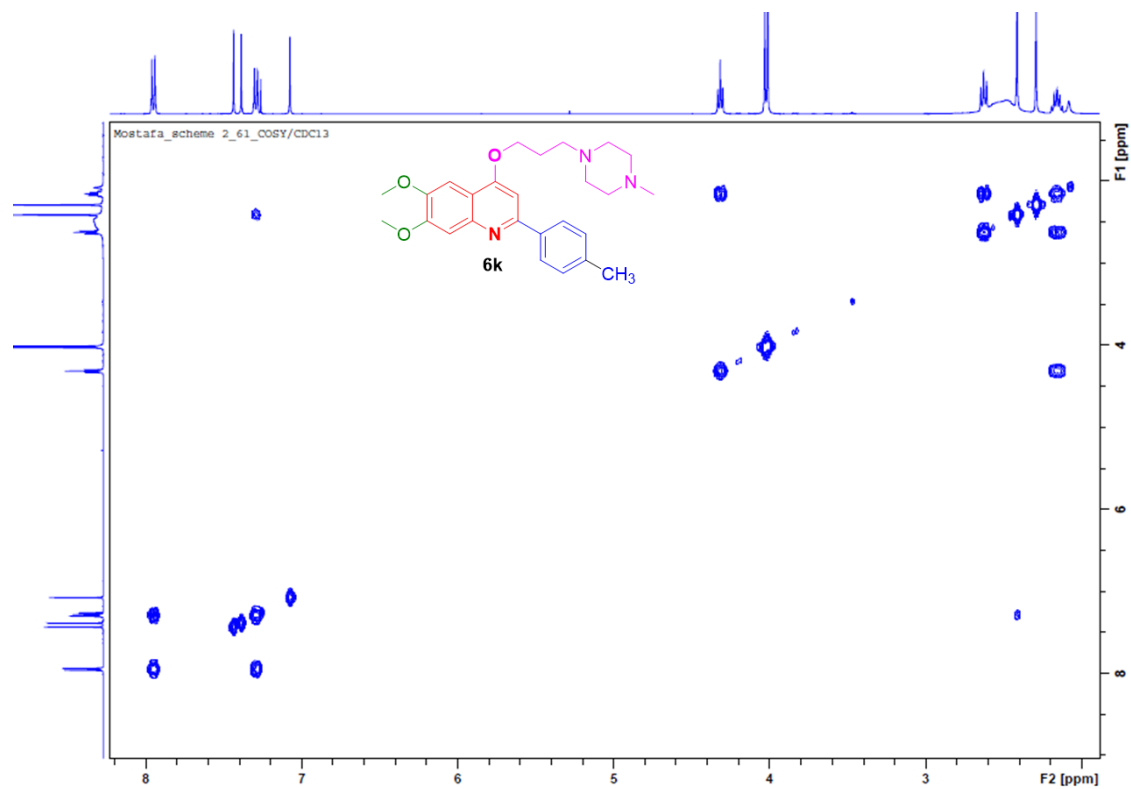

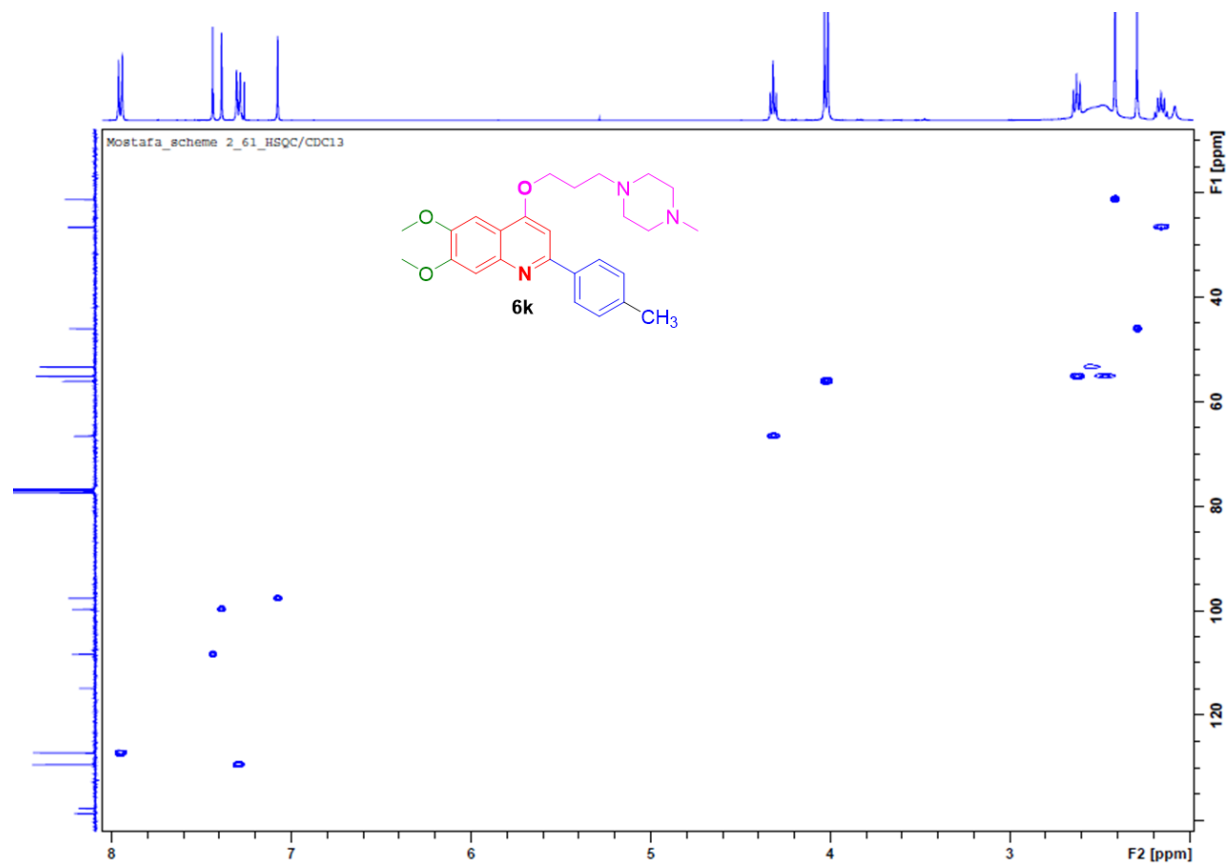

7.9646  
7.9442

7.4396  
7.3927  
7.3041  
7.2844  
7.2599  
7.0879

4.3645  
4.3492  
4.3339  
4.0343  
4.0198  
2.9534  
2.9359  
2.9185  
2.5114  
2.5019  
2.4923  
2.4852  
2.4789  
2.4692  
2.4592  
2.4498  
2.4407  
2.4161  
2.1848  
2.1686  
2.1609  
2.1522  
2.1358  
2.1194  
1.9305  
1.9179  
1.9052  
1.8989  
1.8949  
1.7411  
1.7323  
1.7169  
1.7084  
1.6304  
1.6217  
1.6203  
1.6013  
1.5915  
1.3078  
1.2995  
1.2913  
1.2771  
1.2672  
1.2460  
1.2381  
1.2313  
1.2138  
1.2066  
1.1943  
1.1870  
1.1721  
1.1646  
1.1566  
1.1426

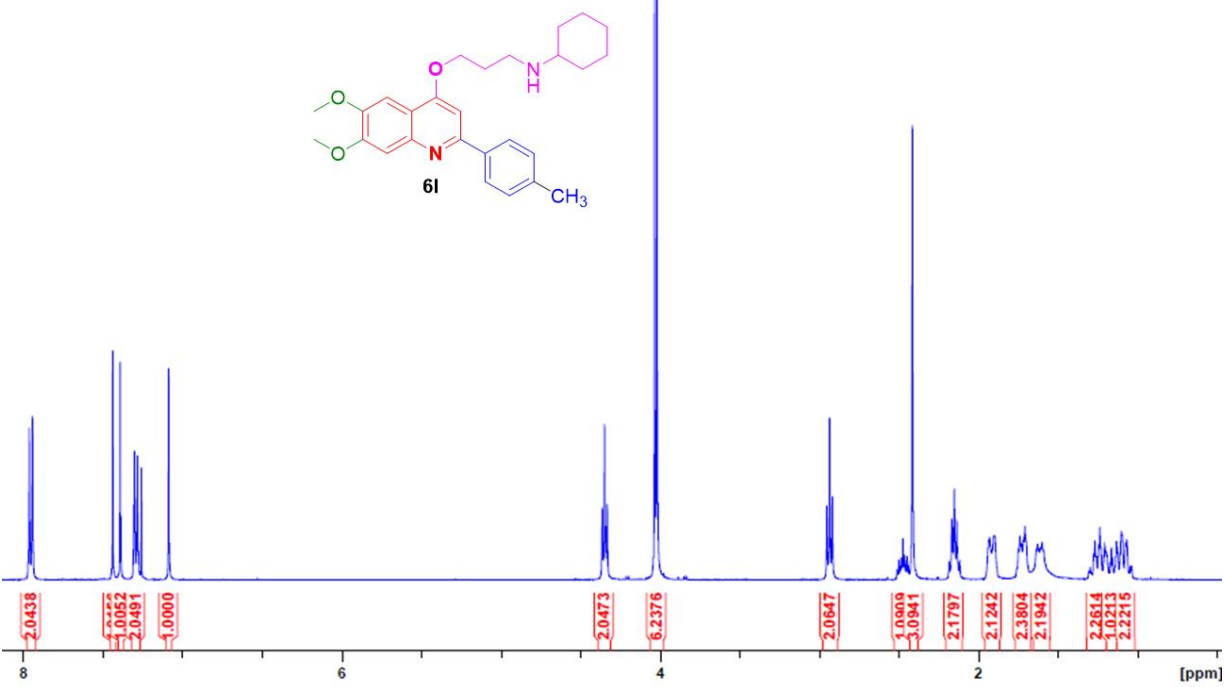

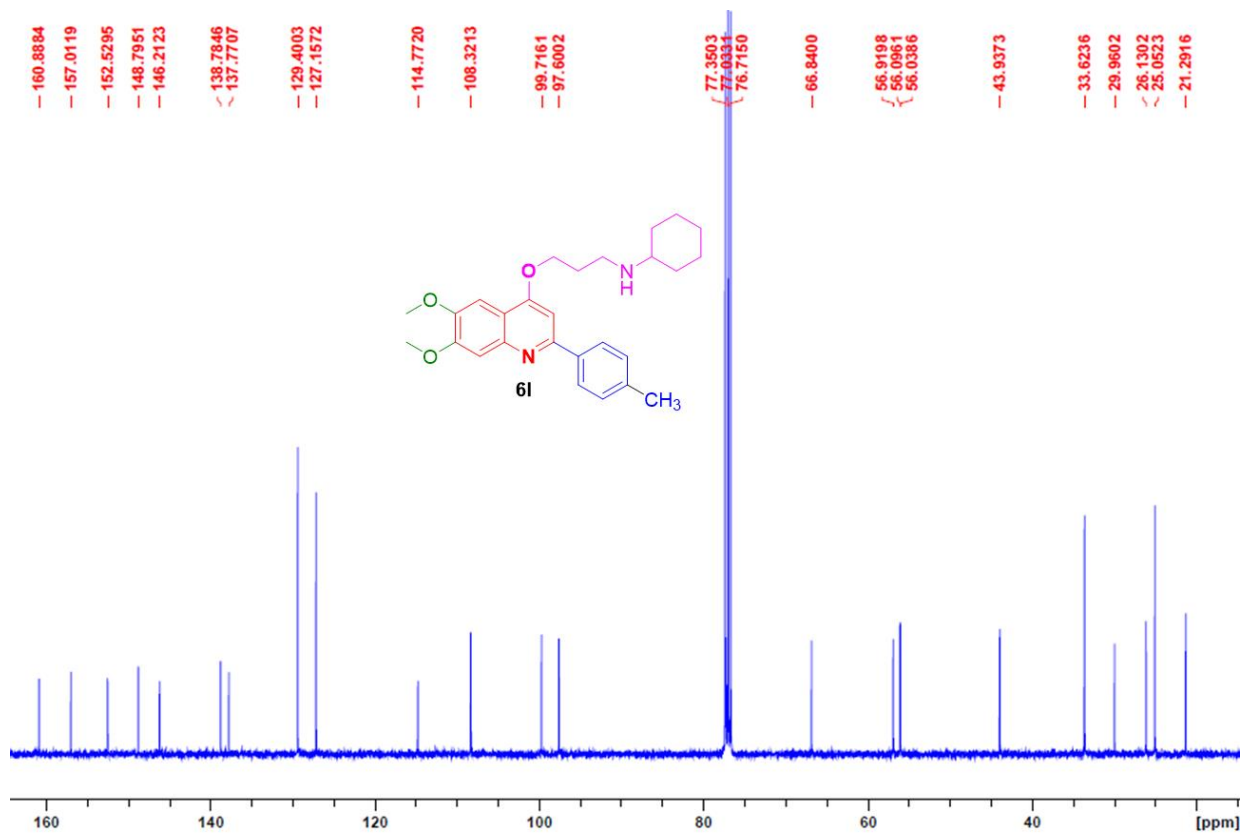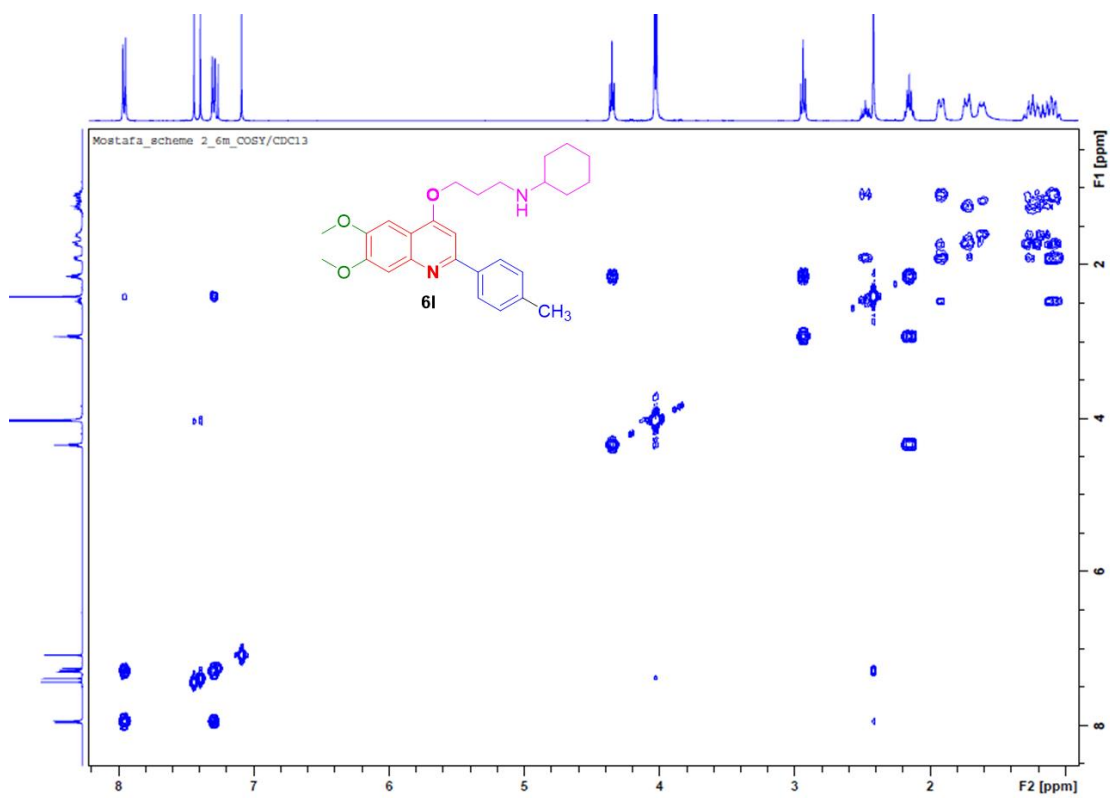

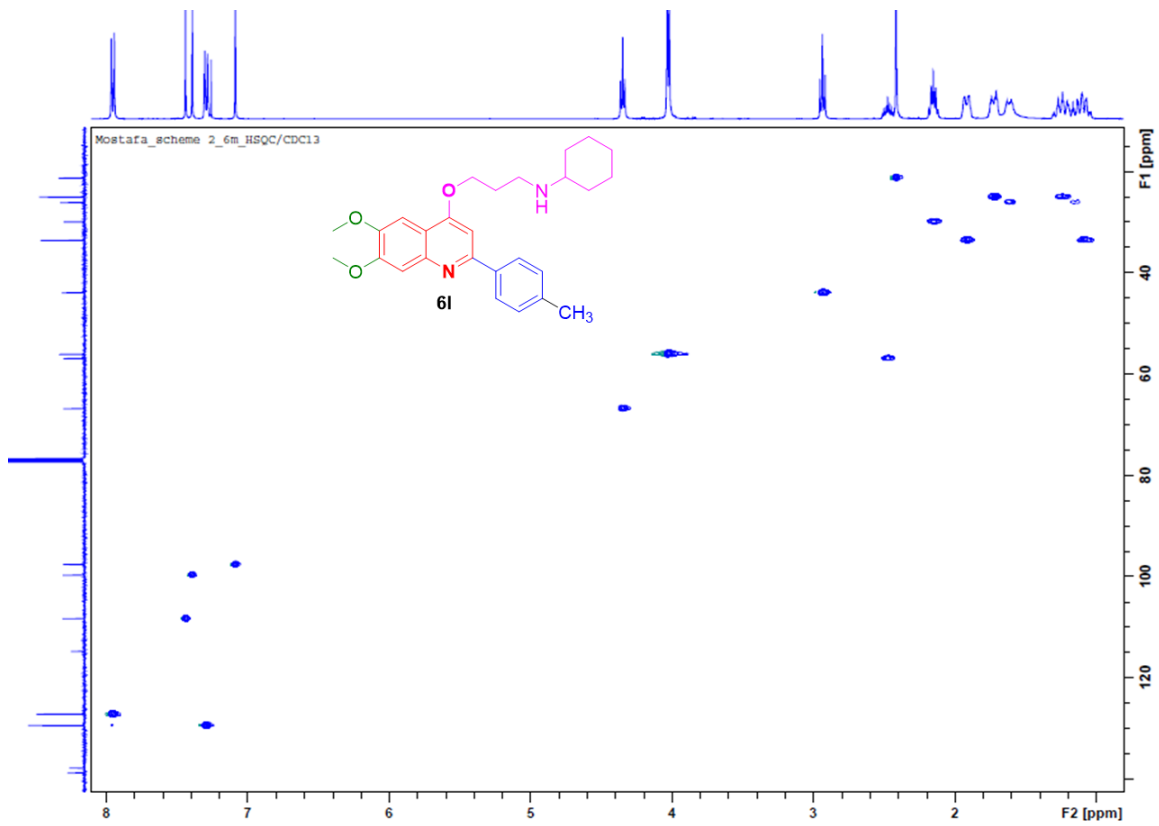

7.9576  
7.9372

7.4360  
7.3790  
7.2991  
7.2793  
7.2599  
7.0815

4.3649  
4.3495  
4.3342  
4.0296  
4.0116

2.9359  
2.9185  
2.9013  
2.8169  
2.7871  
2.5084  
2.4825  
2.4724  
2.4625  
2.4464  
2.4366  
2.4109  
2.2461  
2.1690  
2.1529  
2.1365  
2.1203  
2.1039  
1.9885  
1.9696  
1.9405  
1.8747  
1.8554  
1.4463  
1.4233  
1.4181  
1.3969  
1.3910  
1.3686  
1.3592

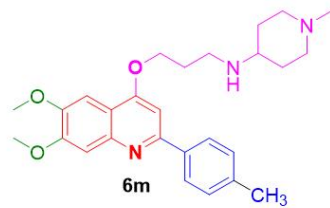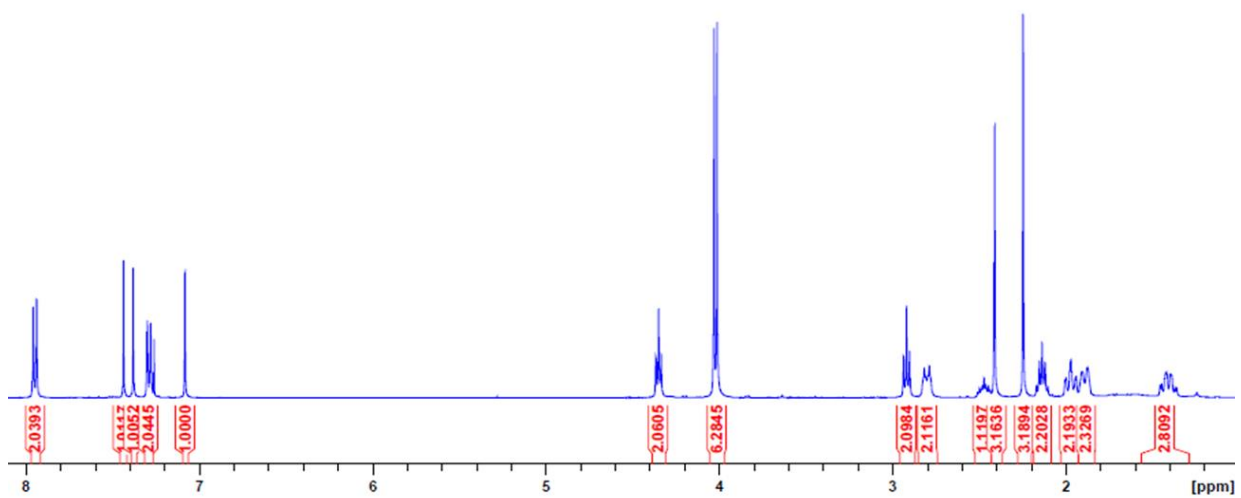



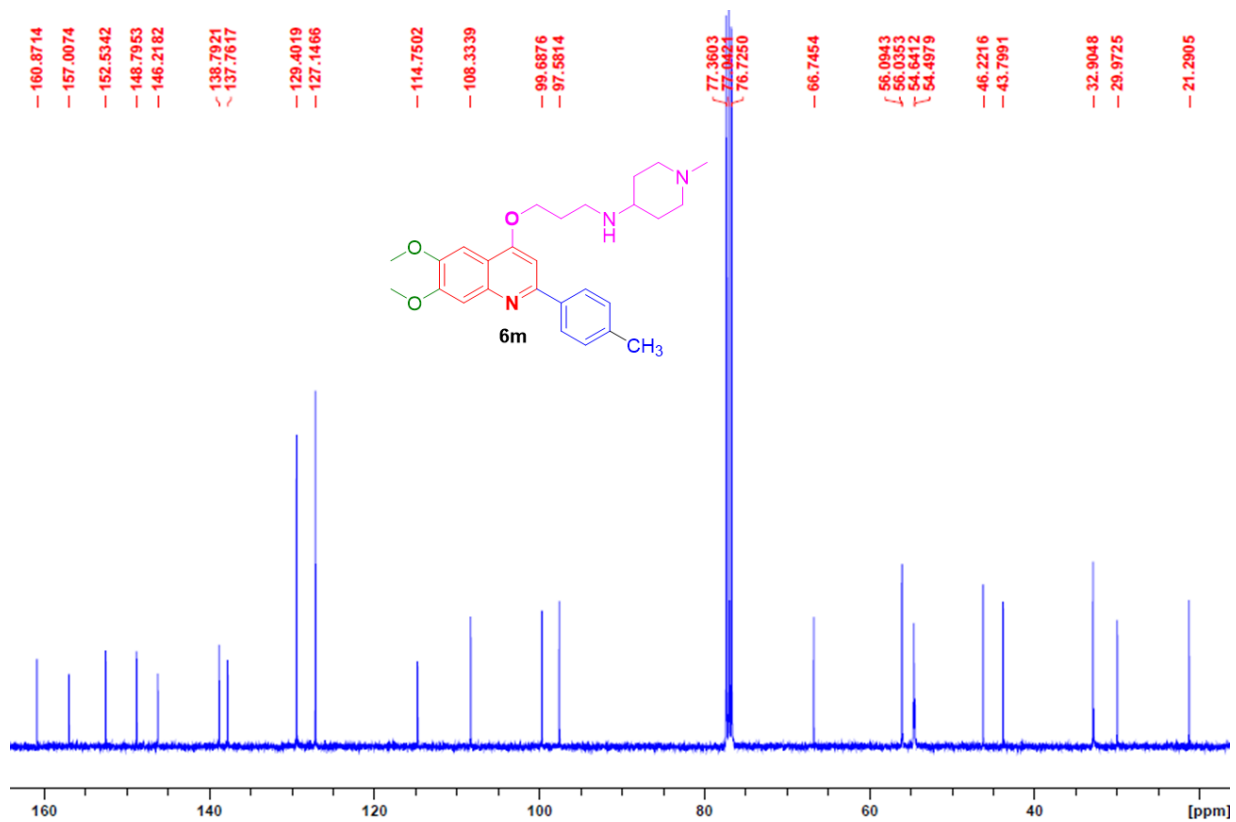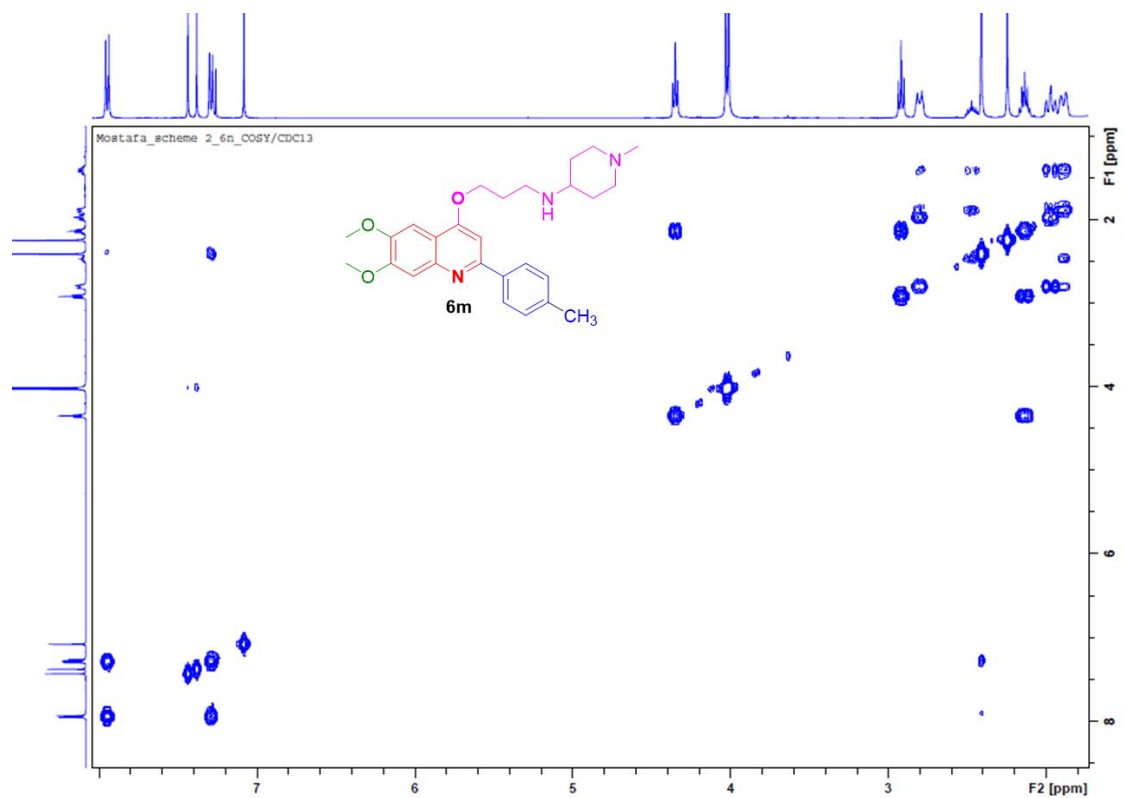

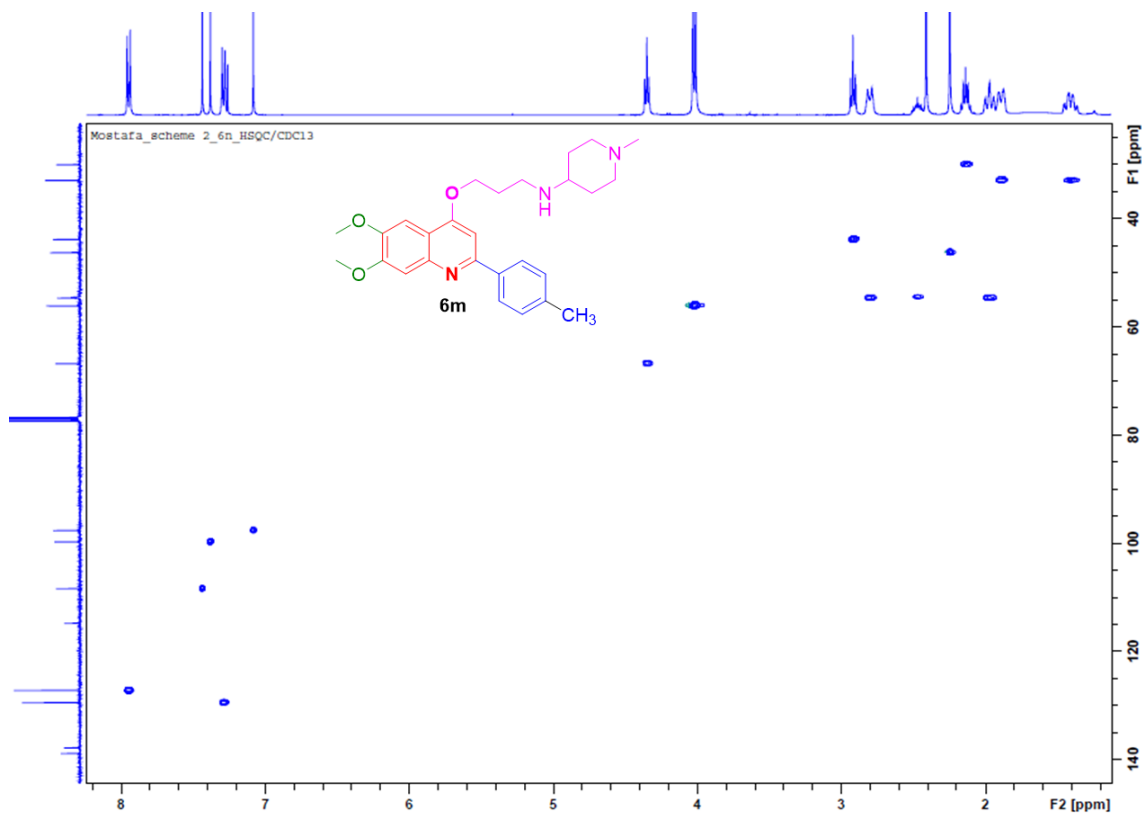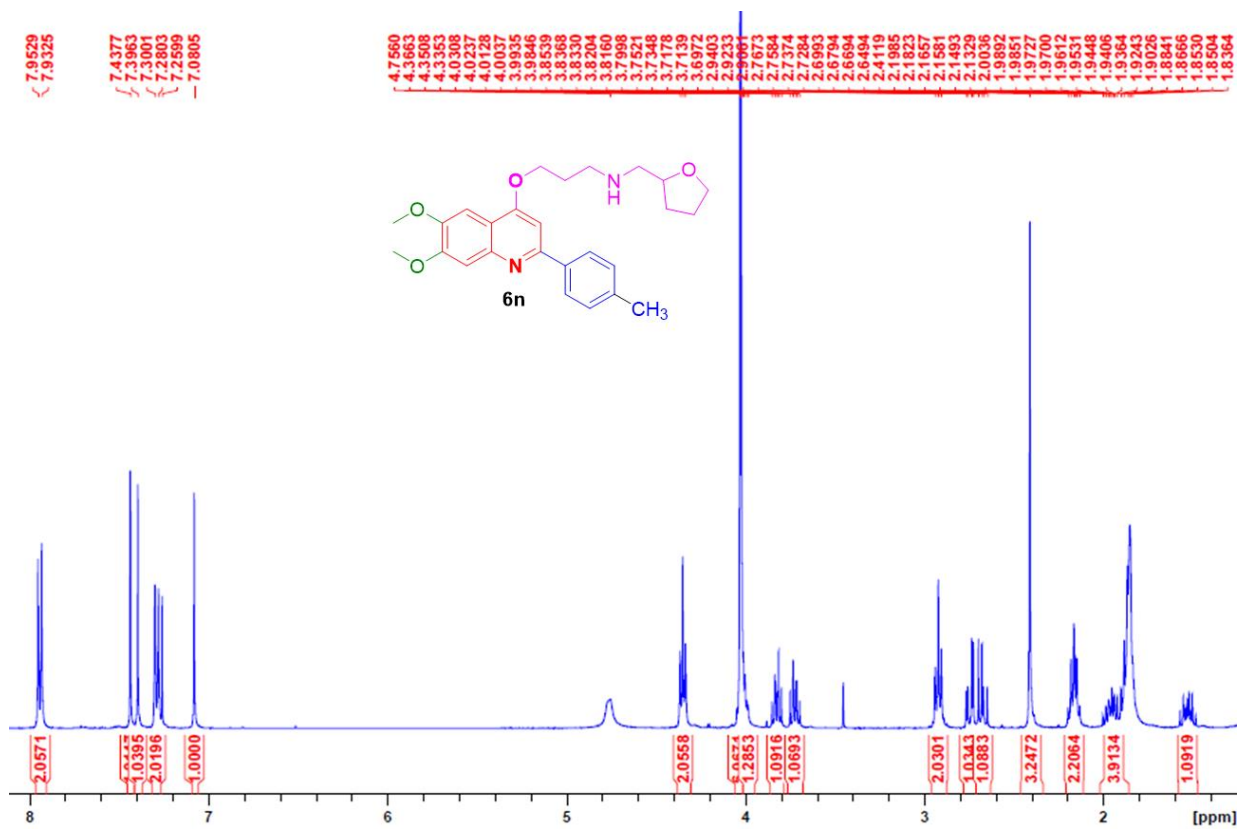

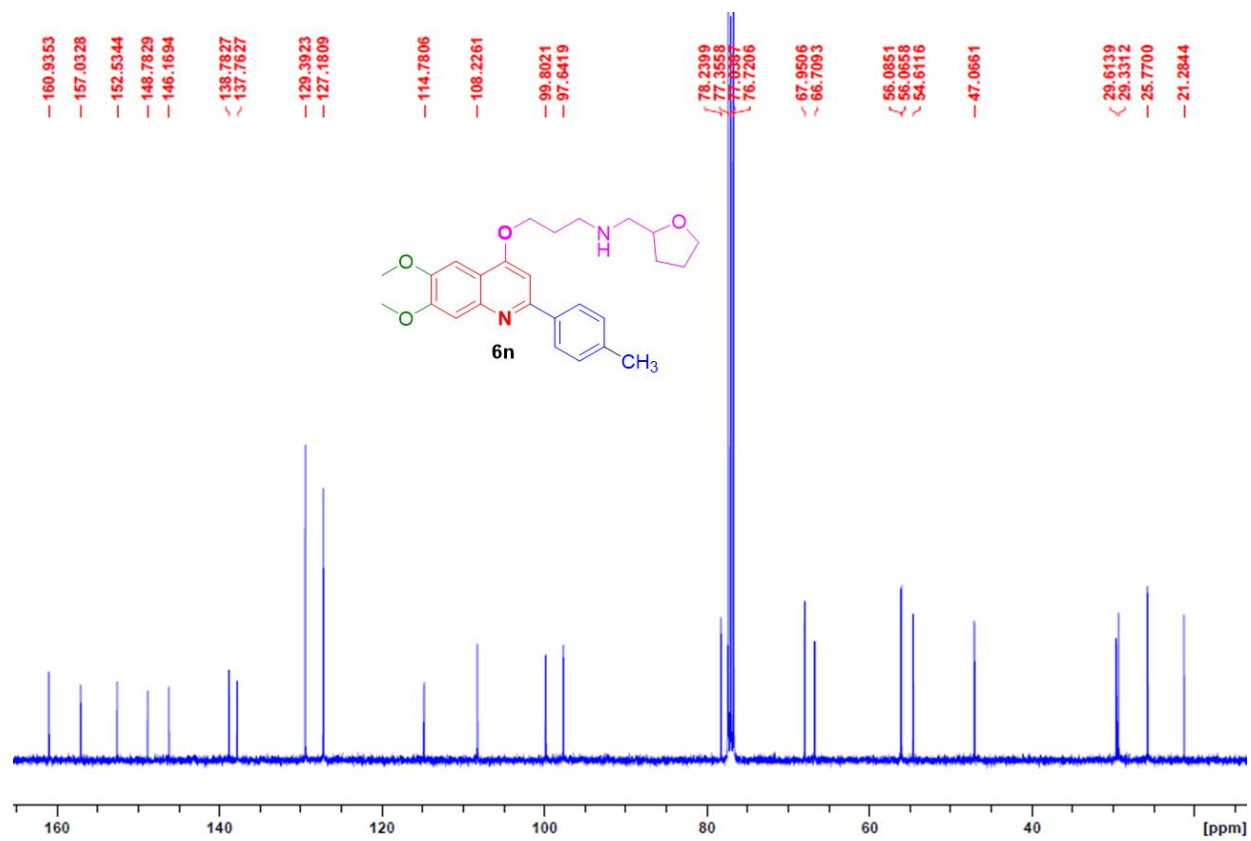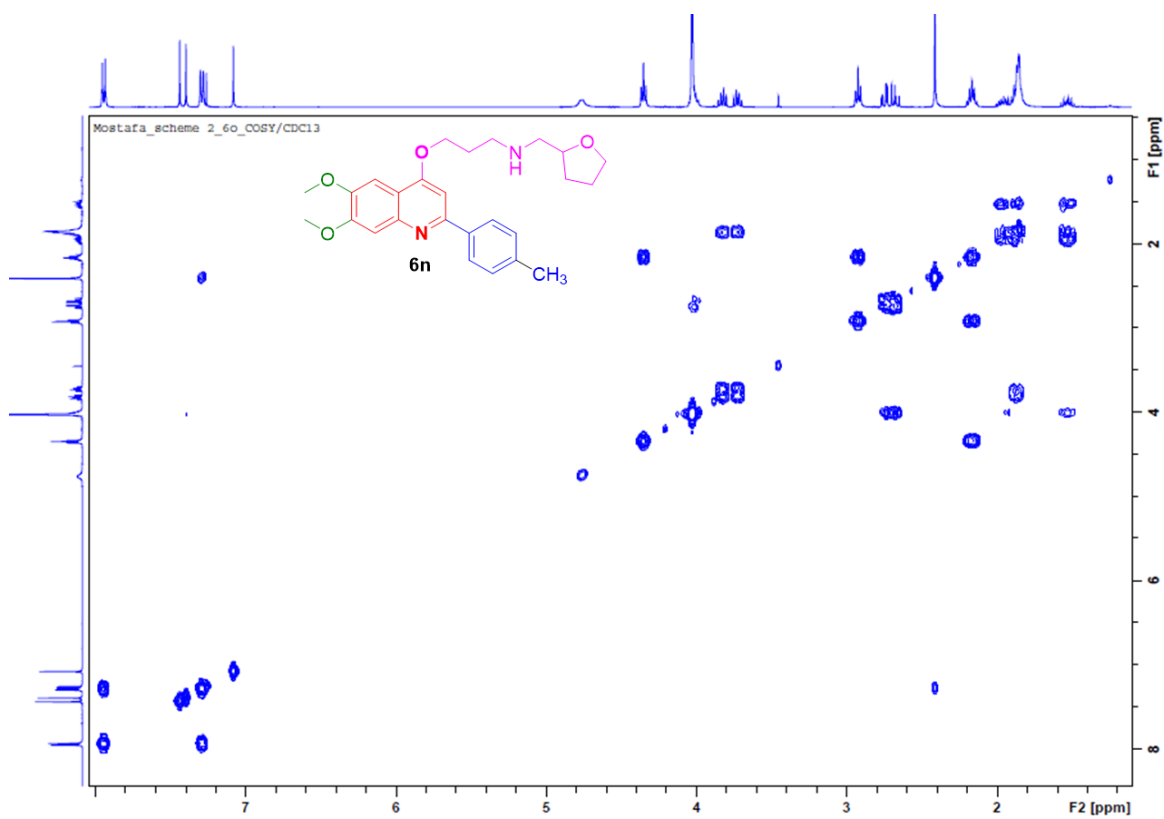

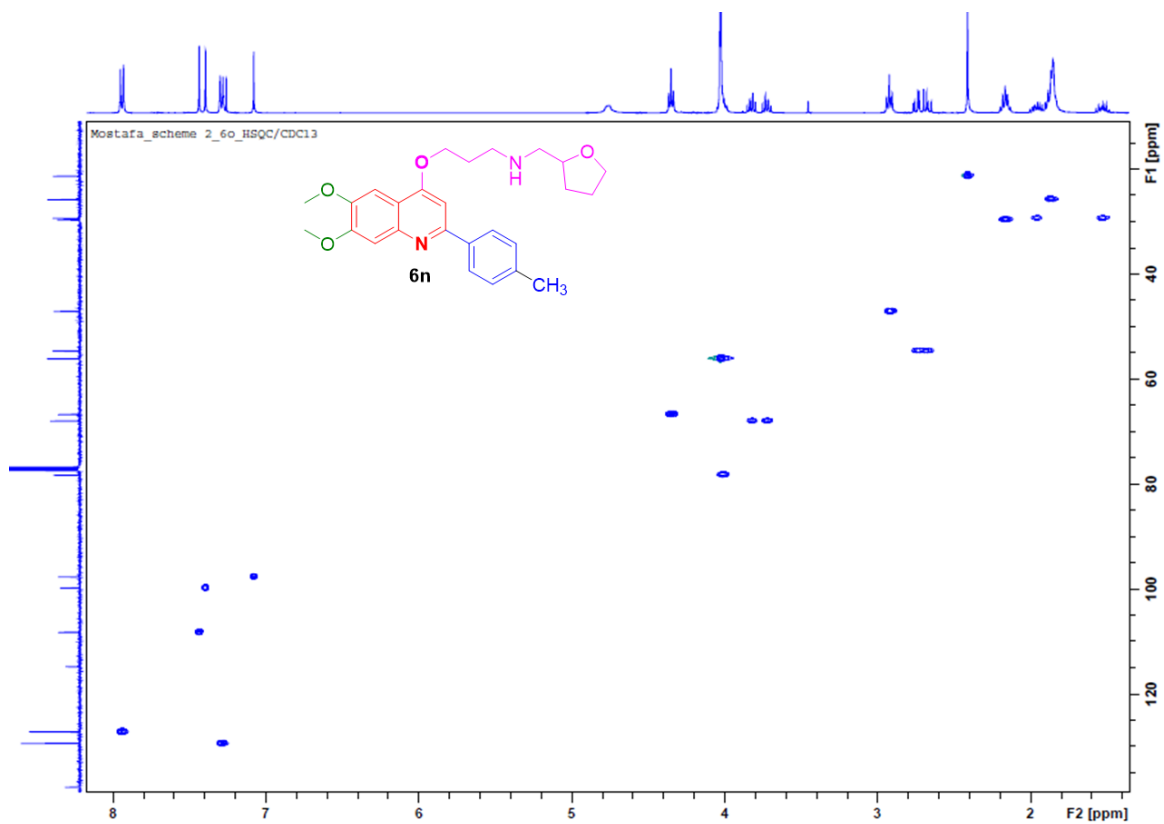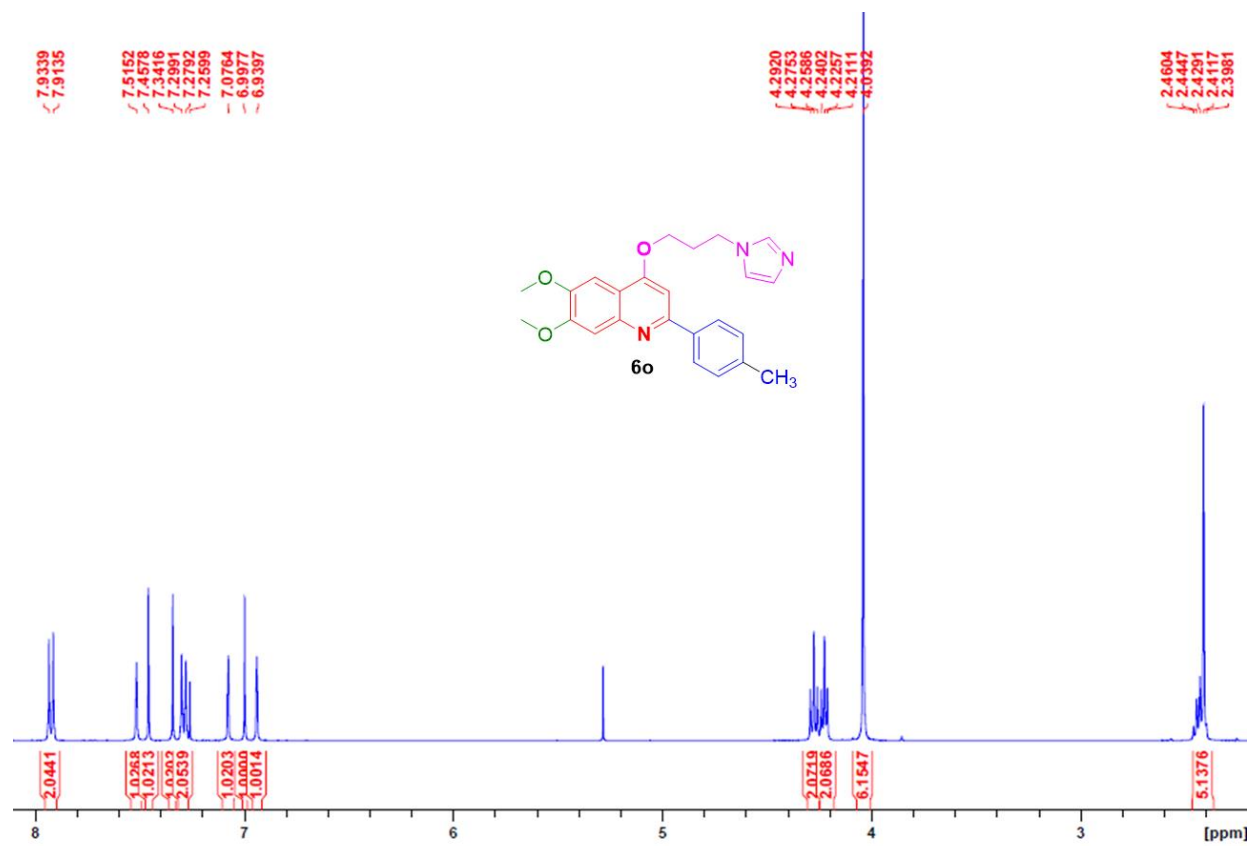

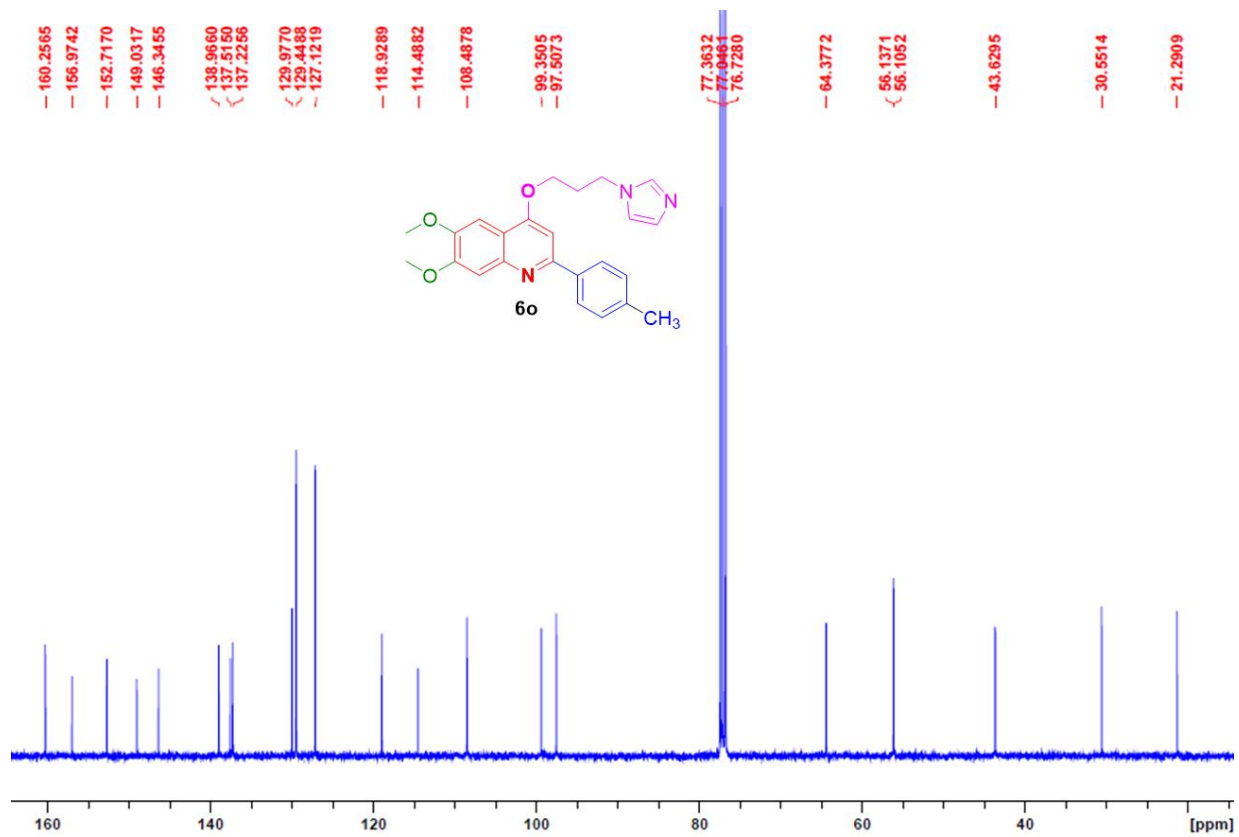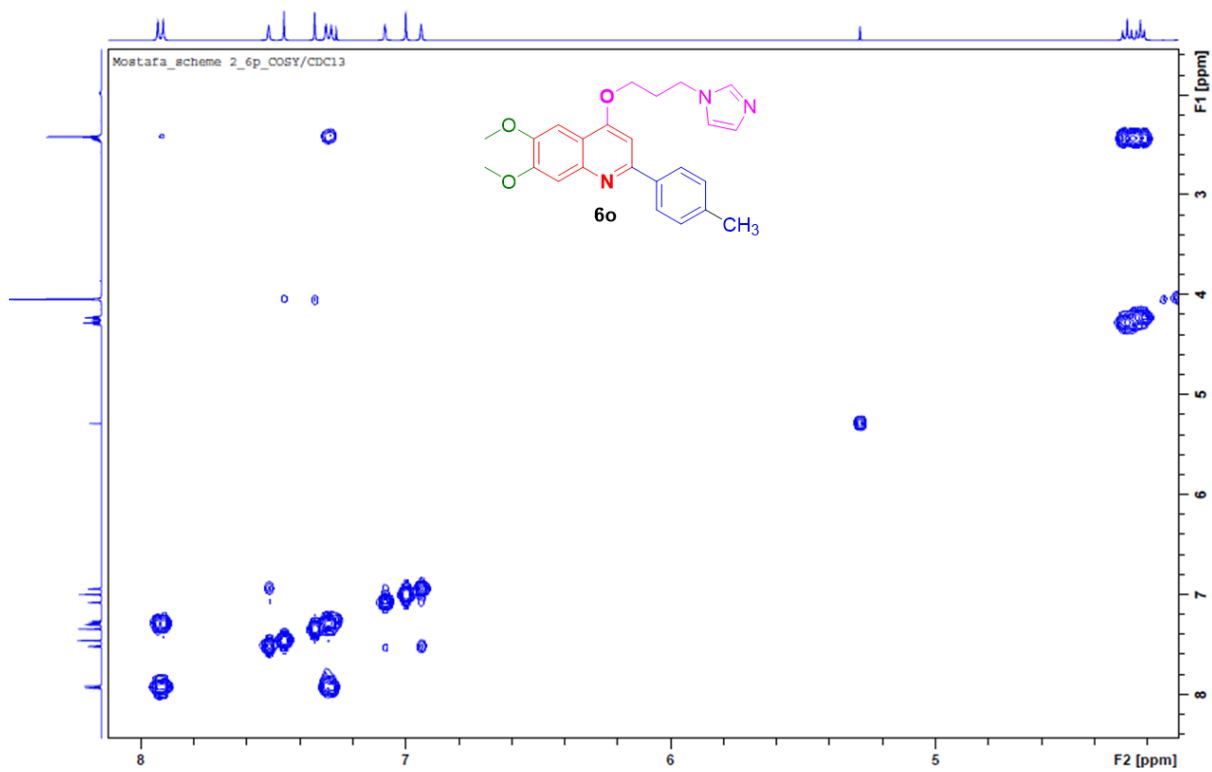

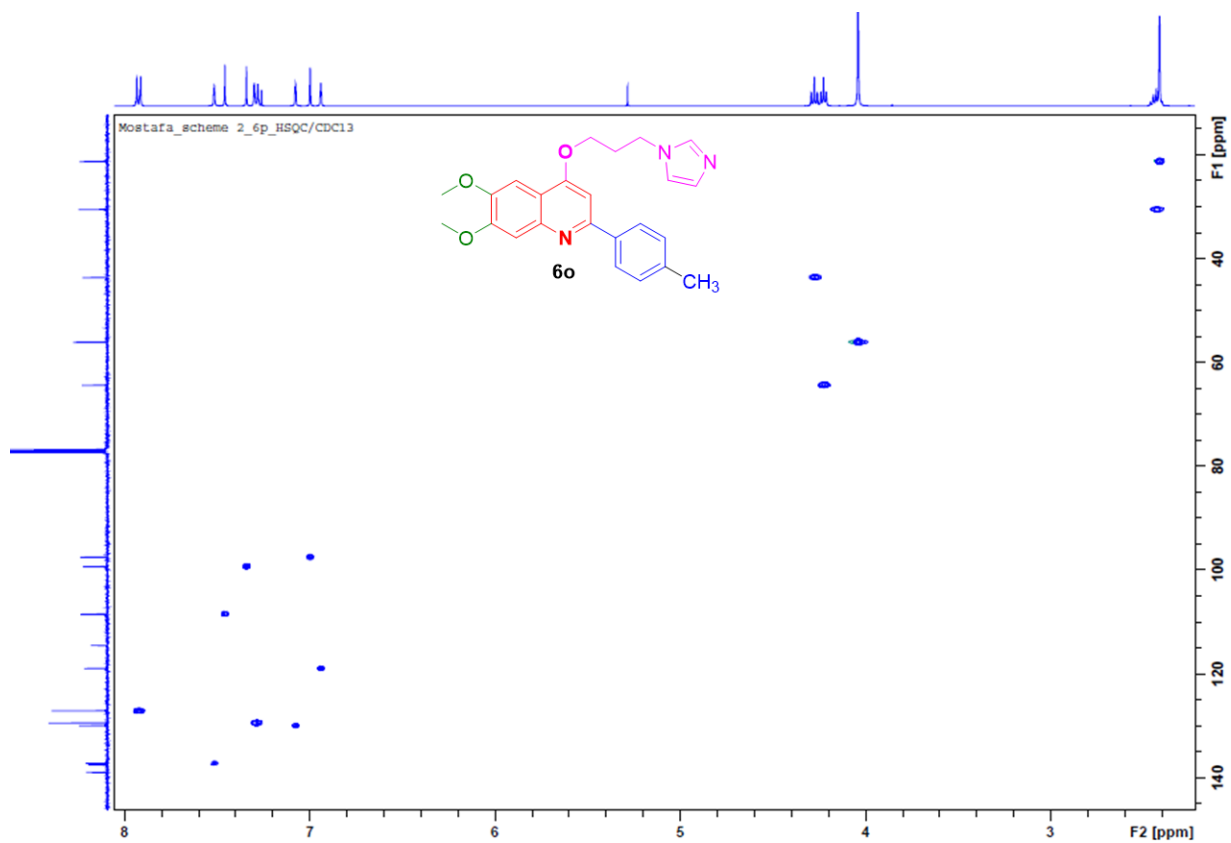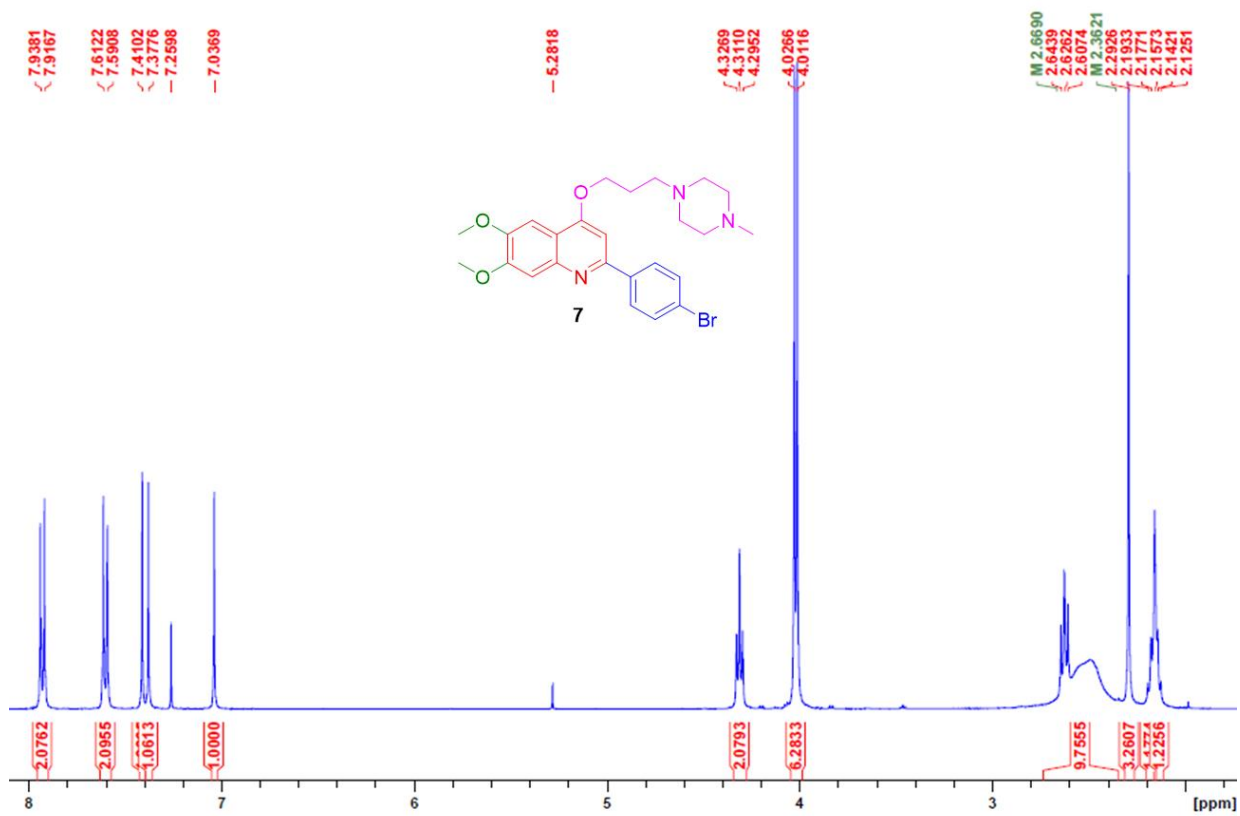

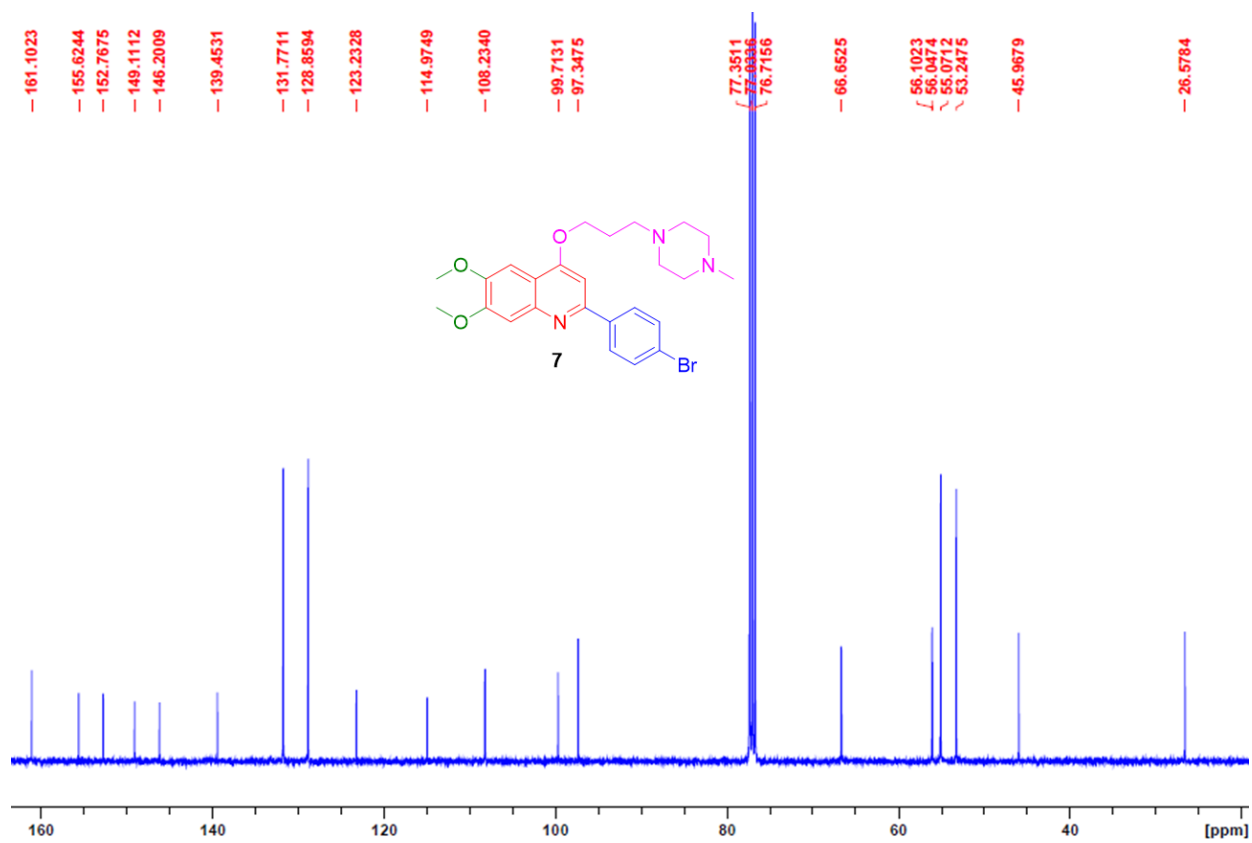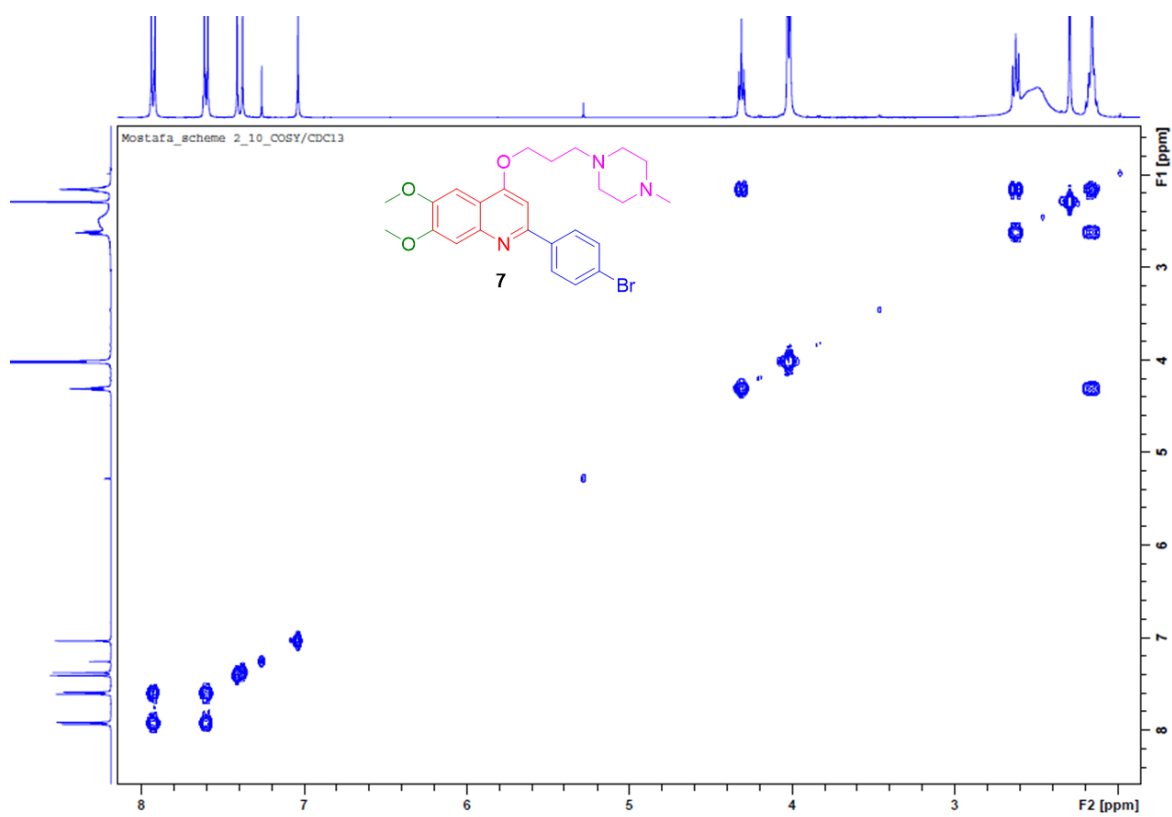

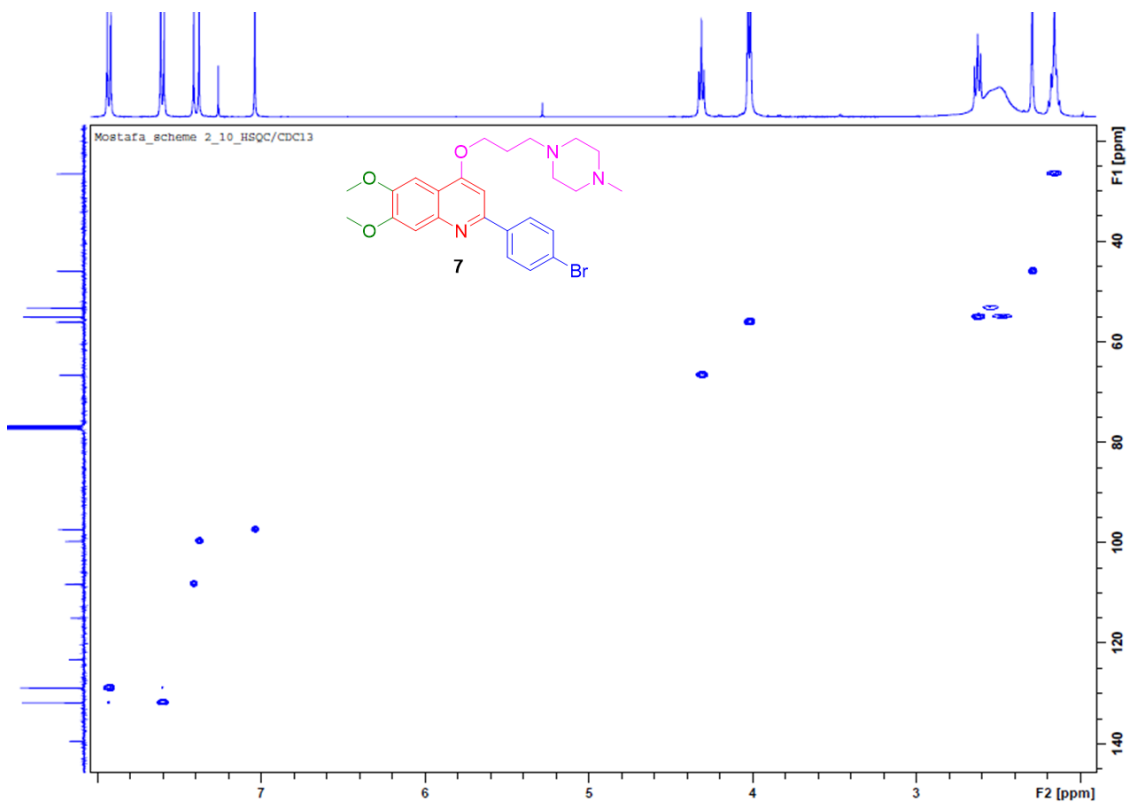

- |          |        |          |
|----------|--------|----------|
| 8.1077   | 4.3537 | M 2.7807 |
| 8.0863   | 4.3379 | 2.6808   |
| 7.8011   | 4.3221 | 2.6631   |
| 7.7798   |        | 2.6444   |
| 7.5081   |        | M 2.4391 |
| 7.5068   |        | 2.3484   |
| 7.5039   |        | 2.2118   |
| M 7.5026 |        | 2.1958   |
| 7.4899   |        | 2.1776   |
| 7.3899   |        | 2.1601   |
| 7.2600   |        | 2.1441   |
| 7.1126   |        |          |
| 6.7397   |        |          |
| 6.7384   |        |          |
| 6.7313   |        |          |
| 6.7301   |        |          |
| 6.5105   |        |          |
| 6.5090   |        |          |
| 6.4921   |        |          |
| 6.4976   |        |          |

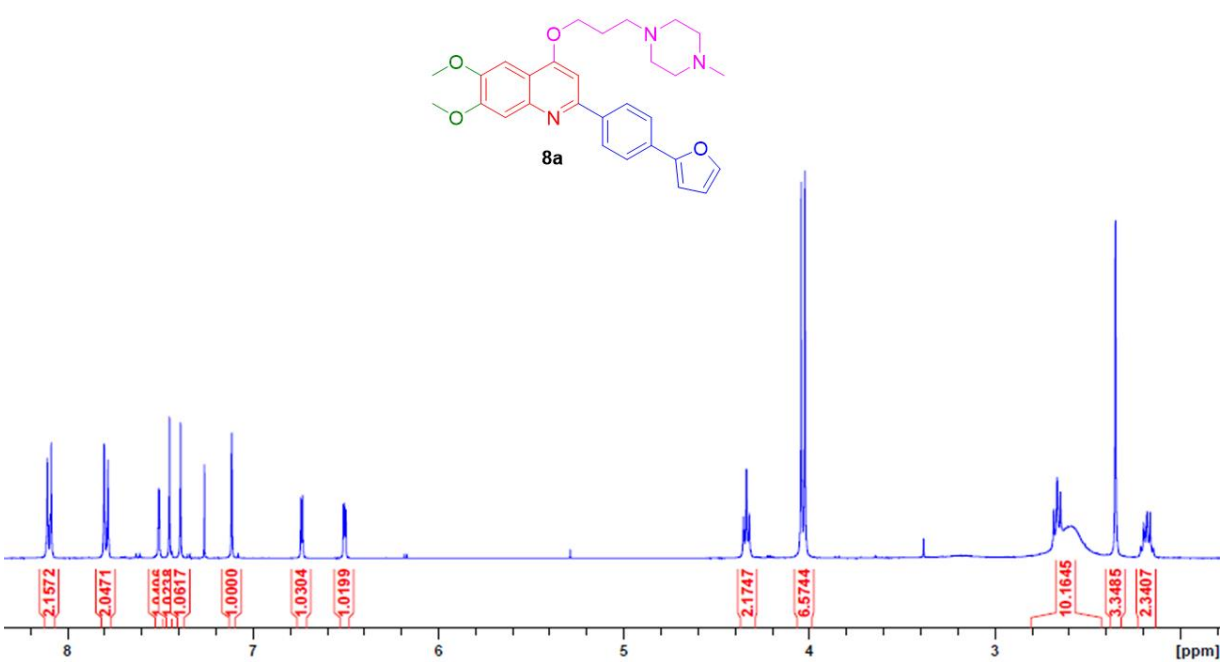



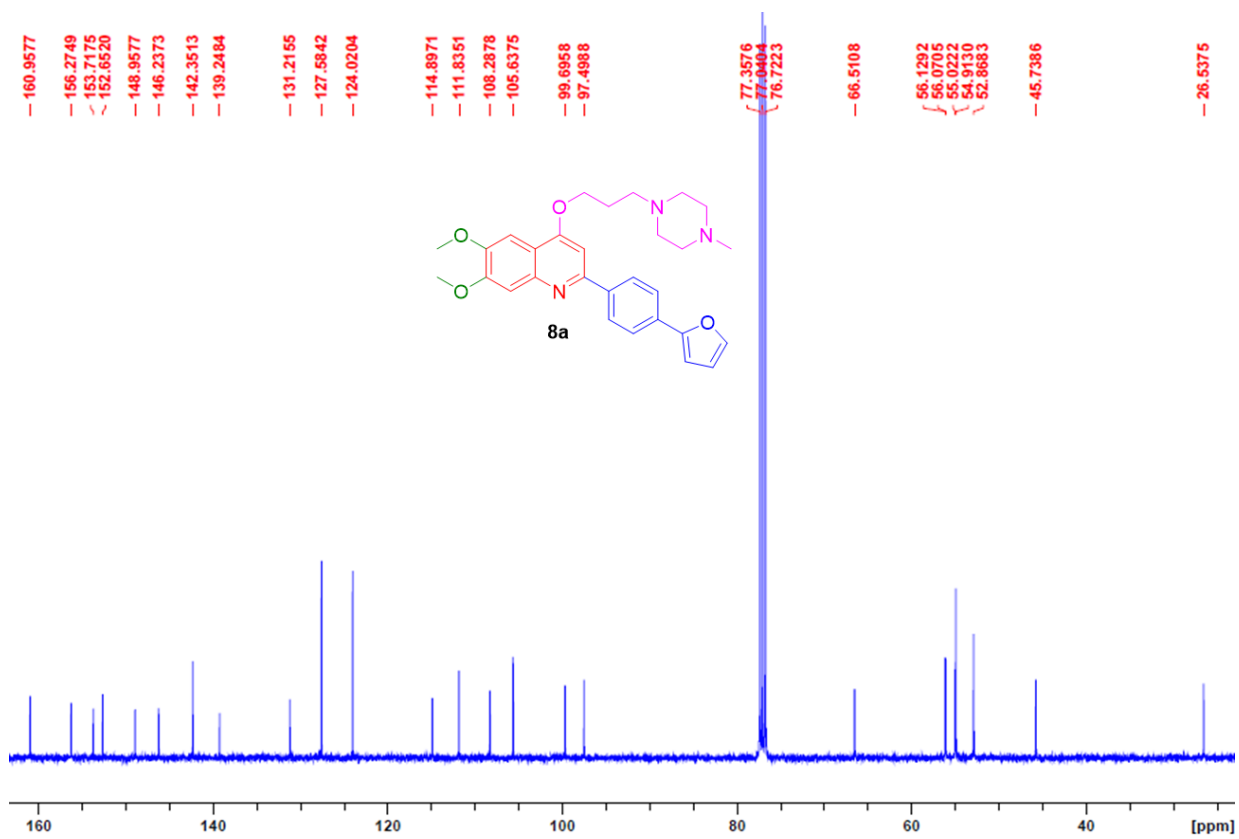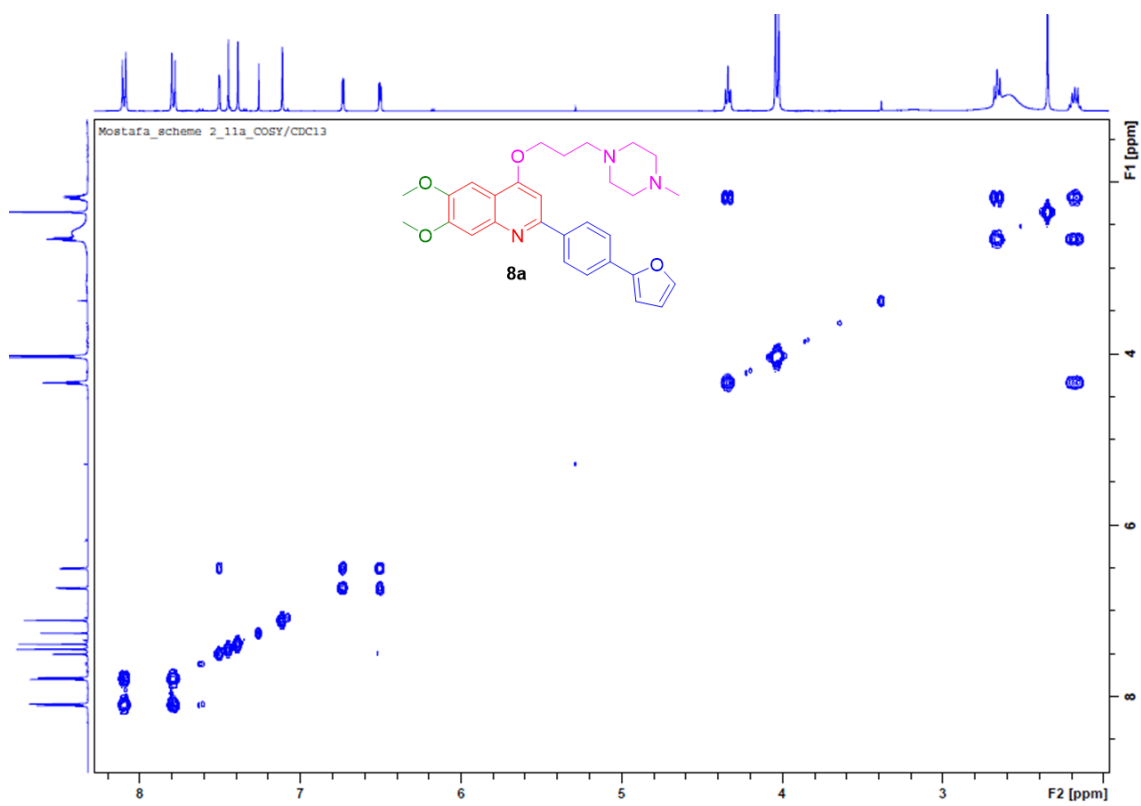

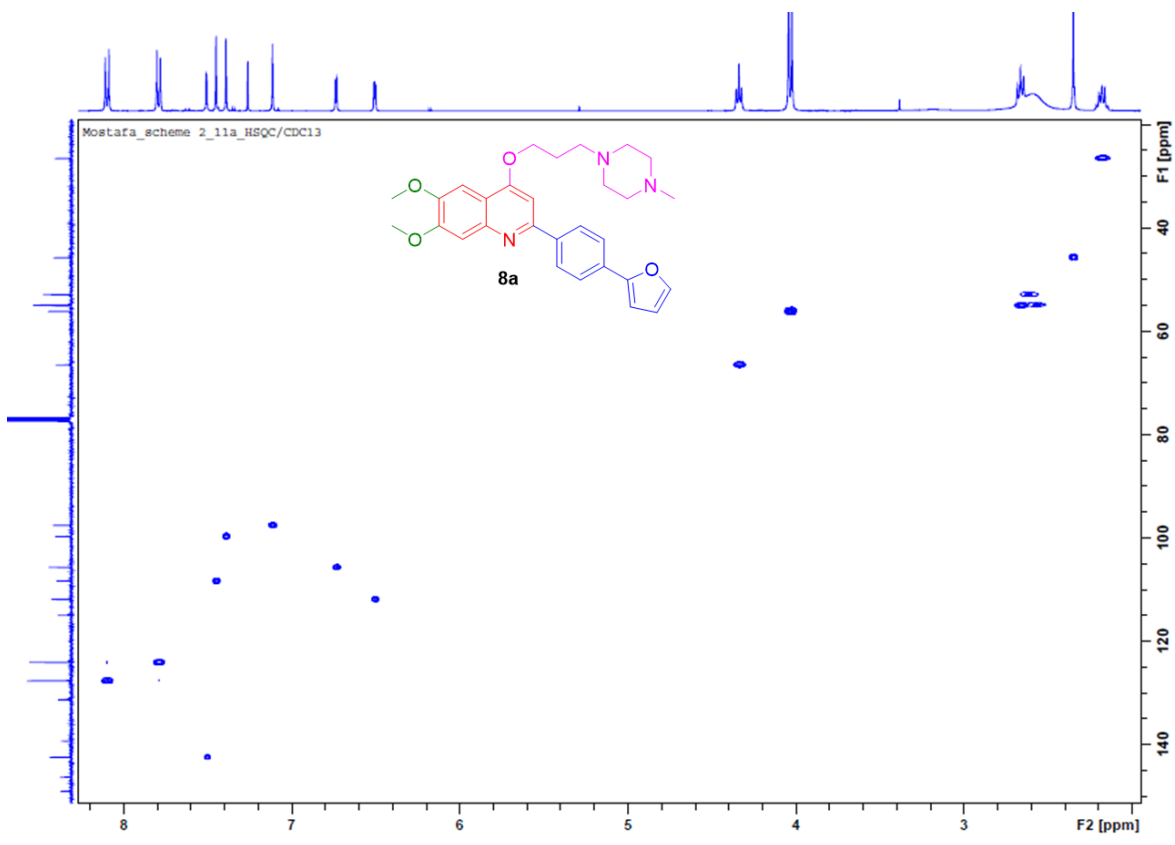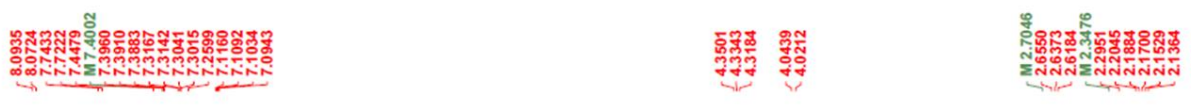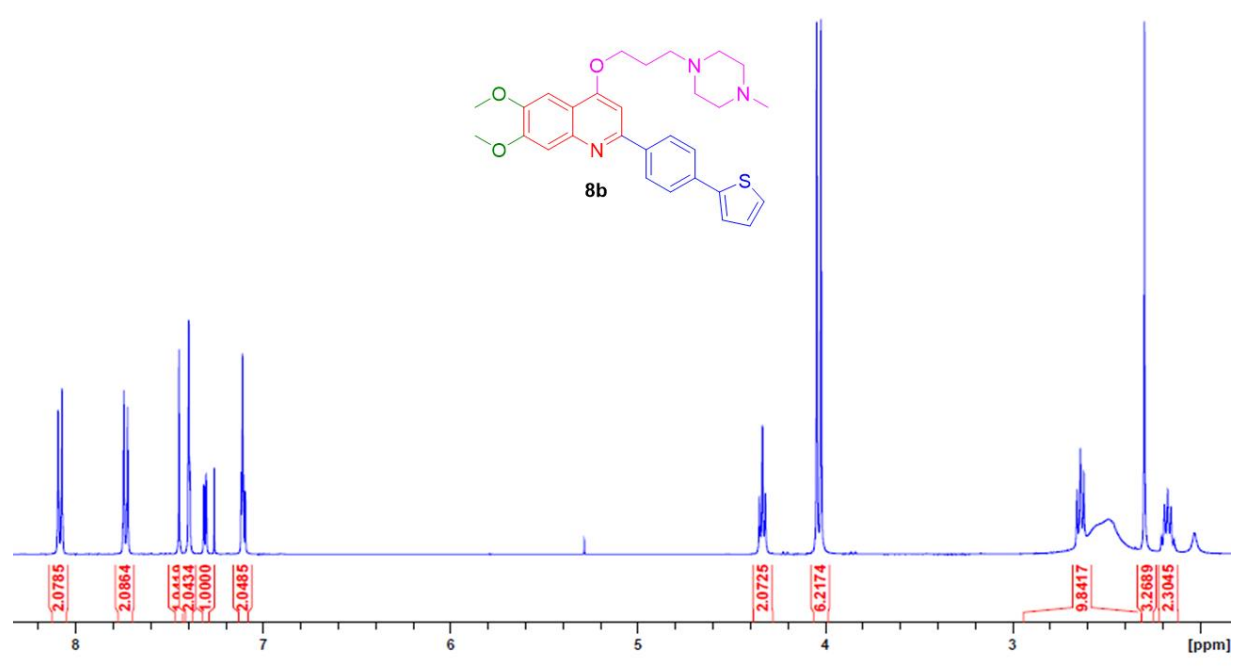

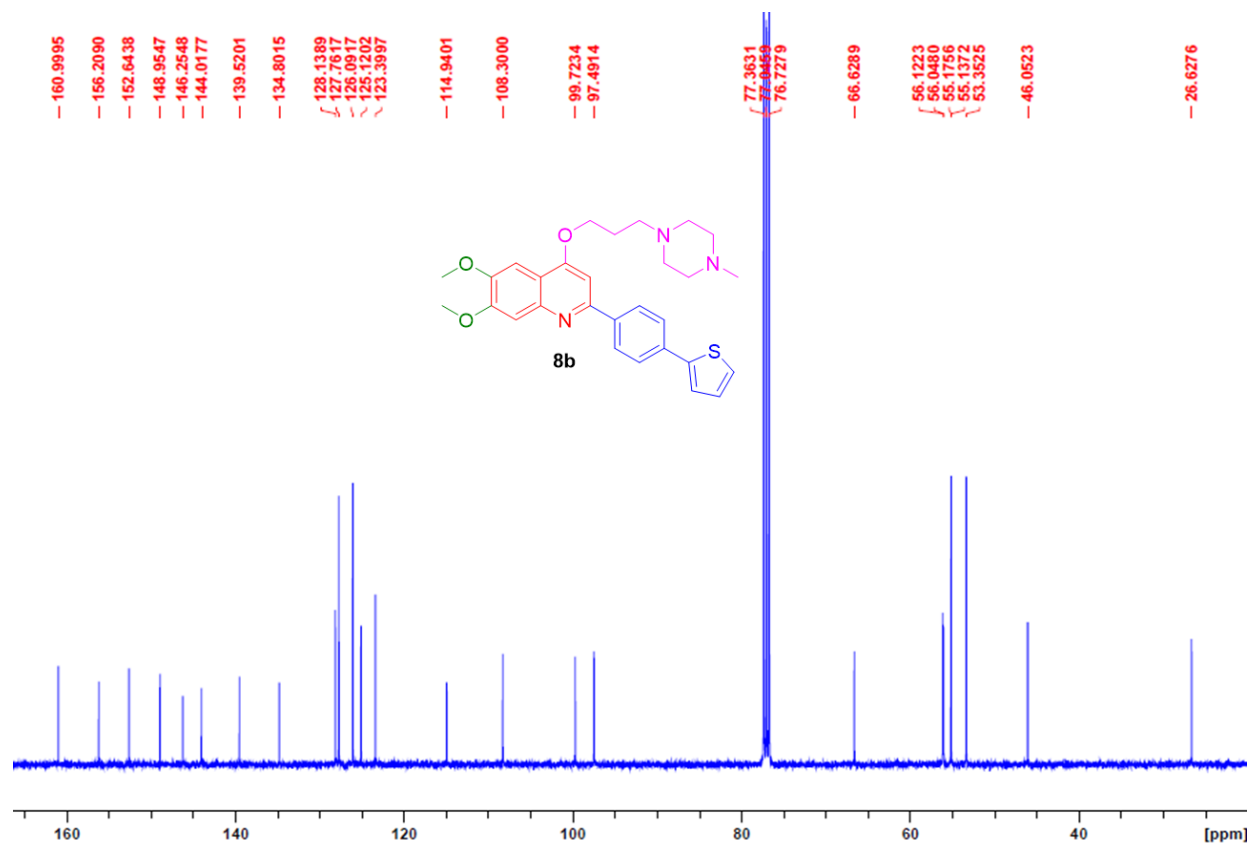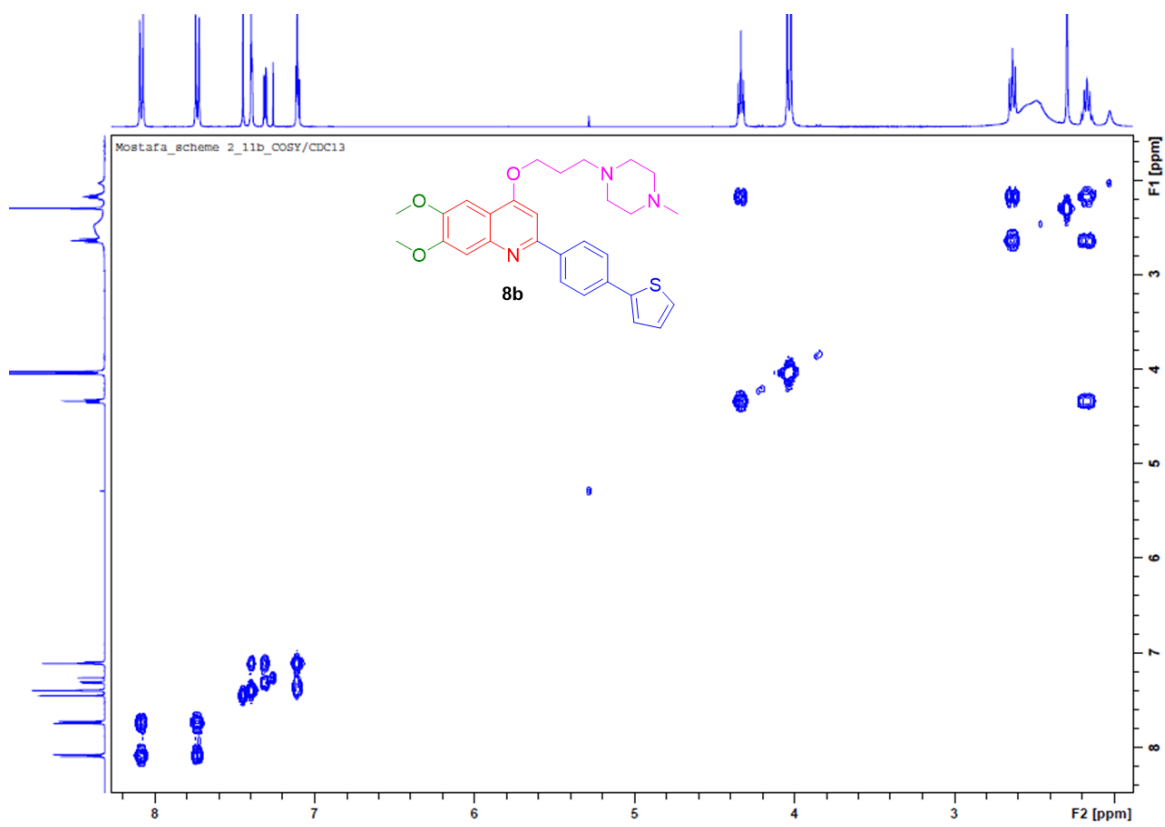

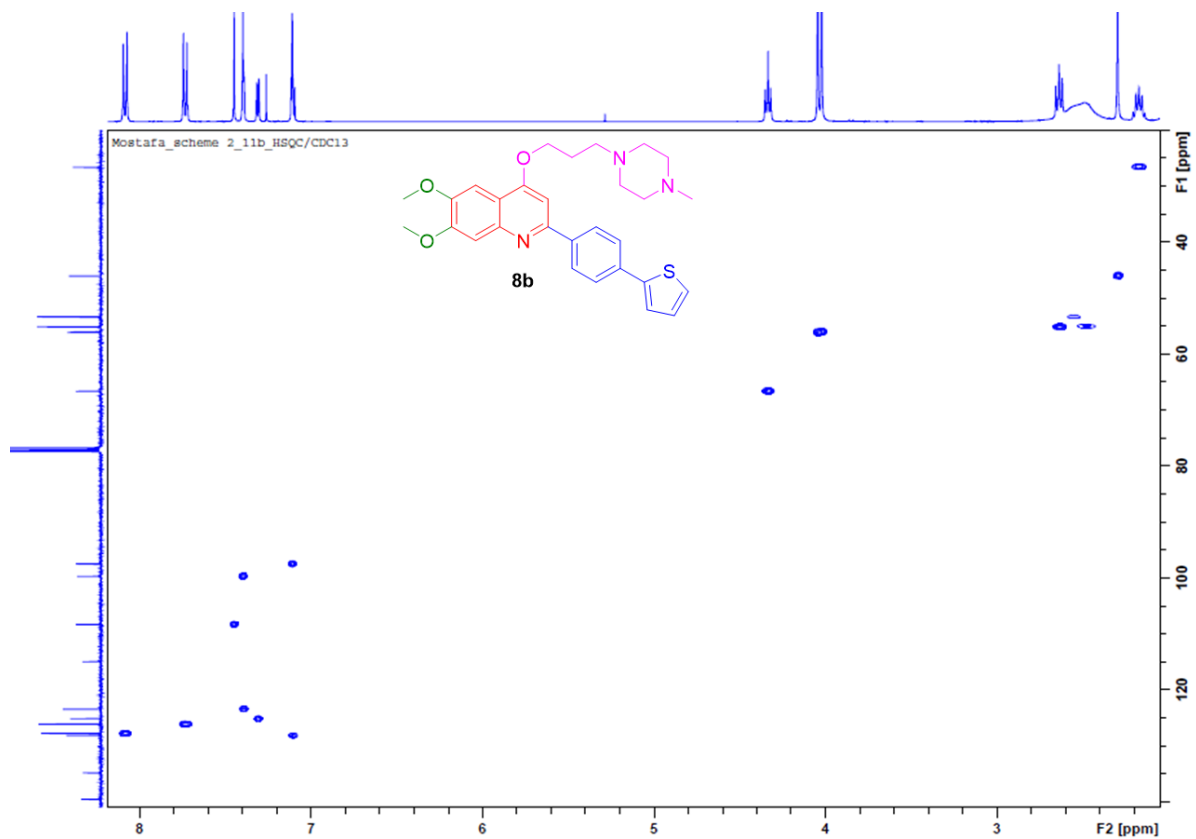

8.2371  
8.2169  
8.1829  
8.1805  
8.1268  
8.1058  
7.7805  
7.7598  
7.7458  
7.7421  
7.7383  
7.7247  
7.7145  
7.6427  
7.5282  
7.5251  
7.5220  
7.5075  
7.5048  
7.2900  
7.2599  
7.2040

4.4789  
4.4653  
4.4507

3.8902  
3.8747  
3.8591

2.4810  
2.4700  
2.4549  
2.4397  
2.4247

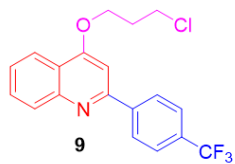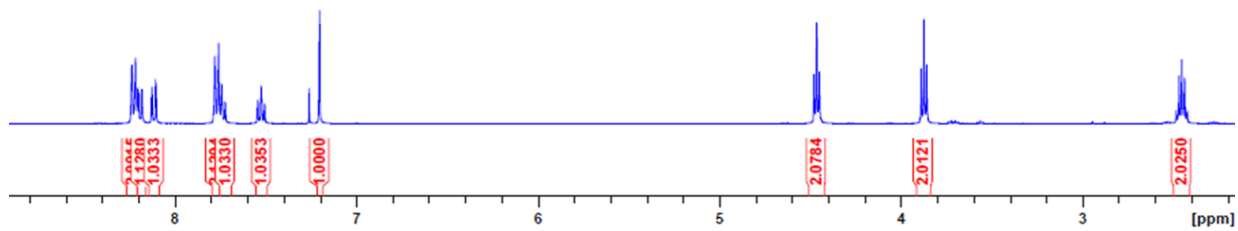

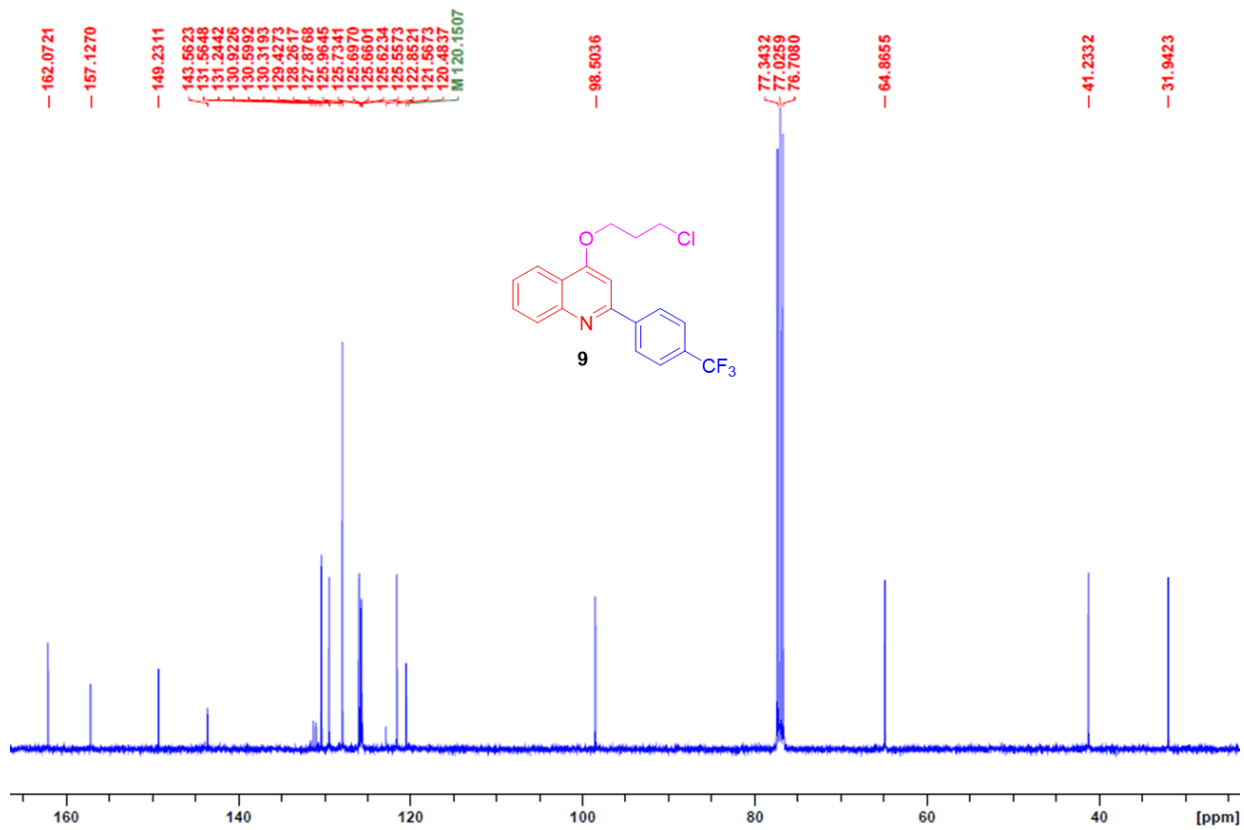

\_19F/CDC13

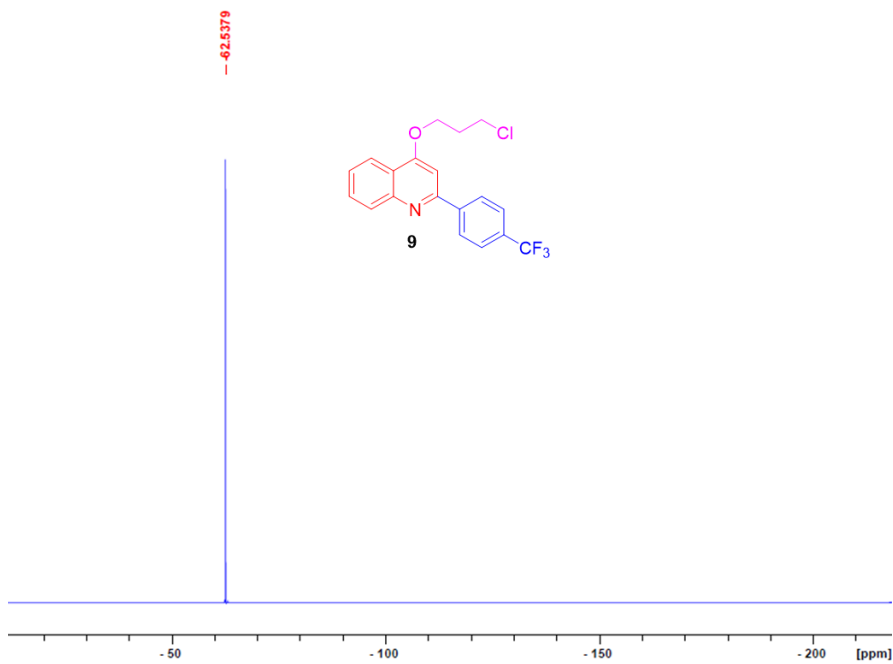

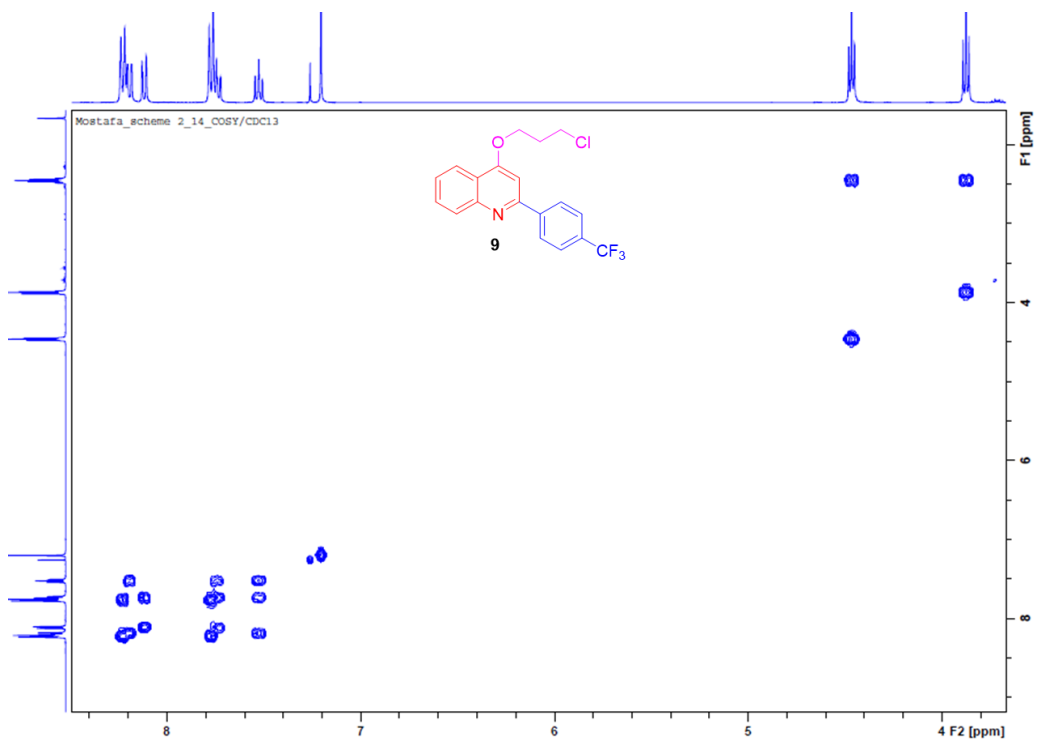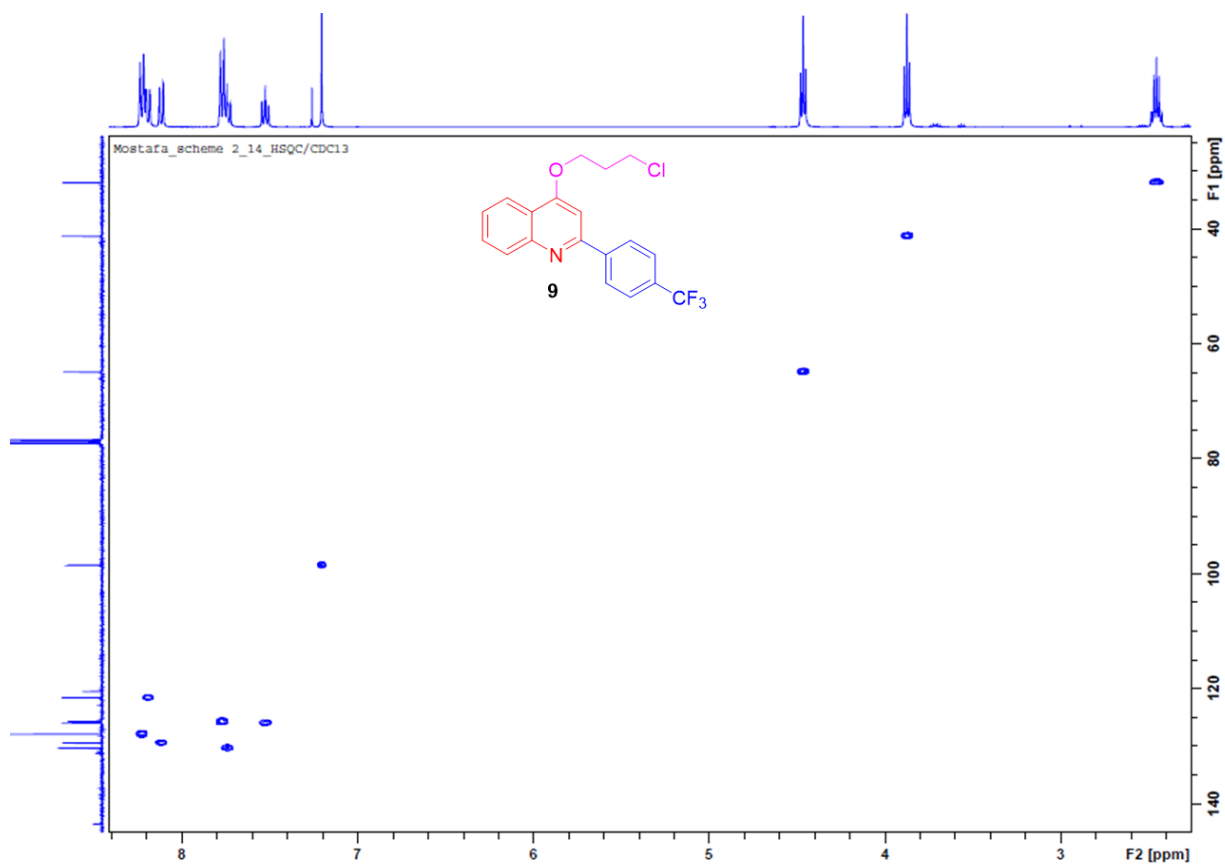

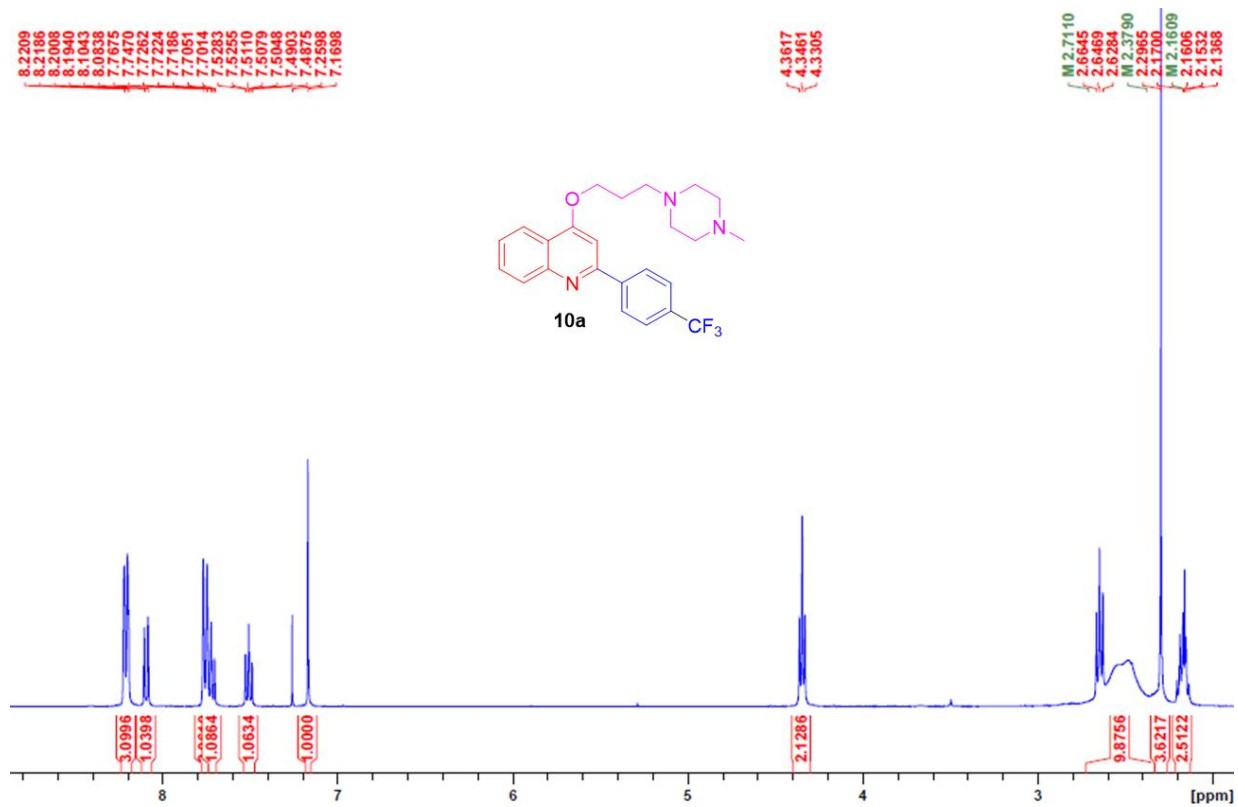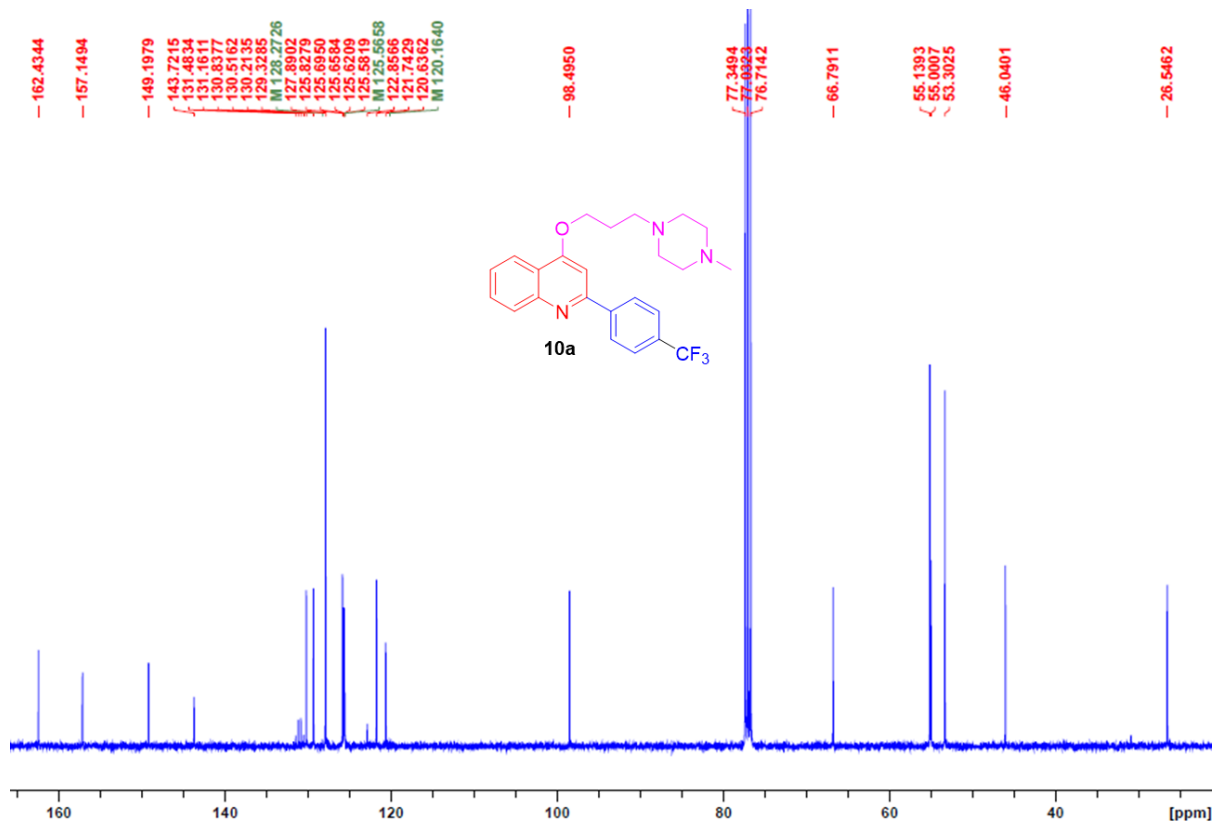

\_19F/CDC13

-62.5306

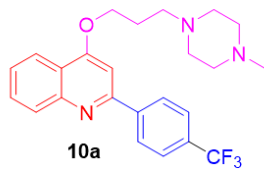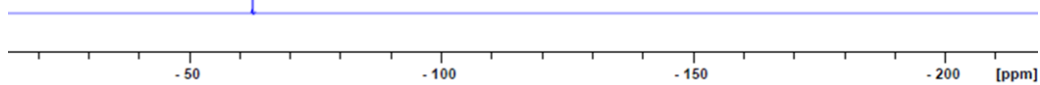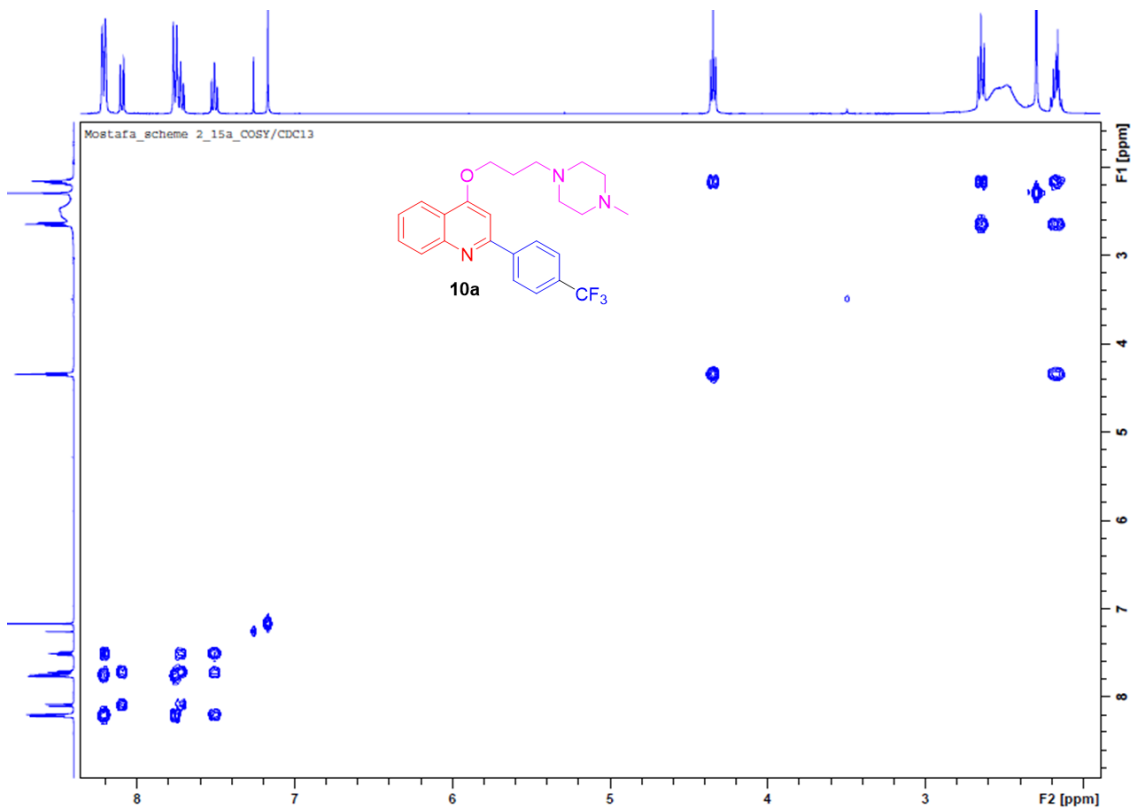



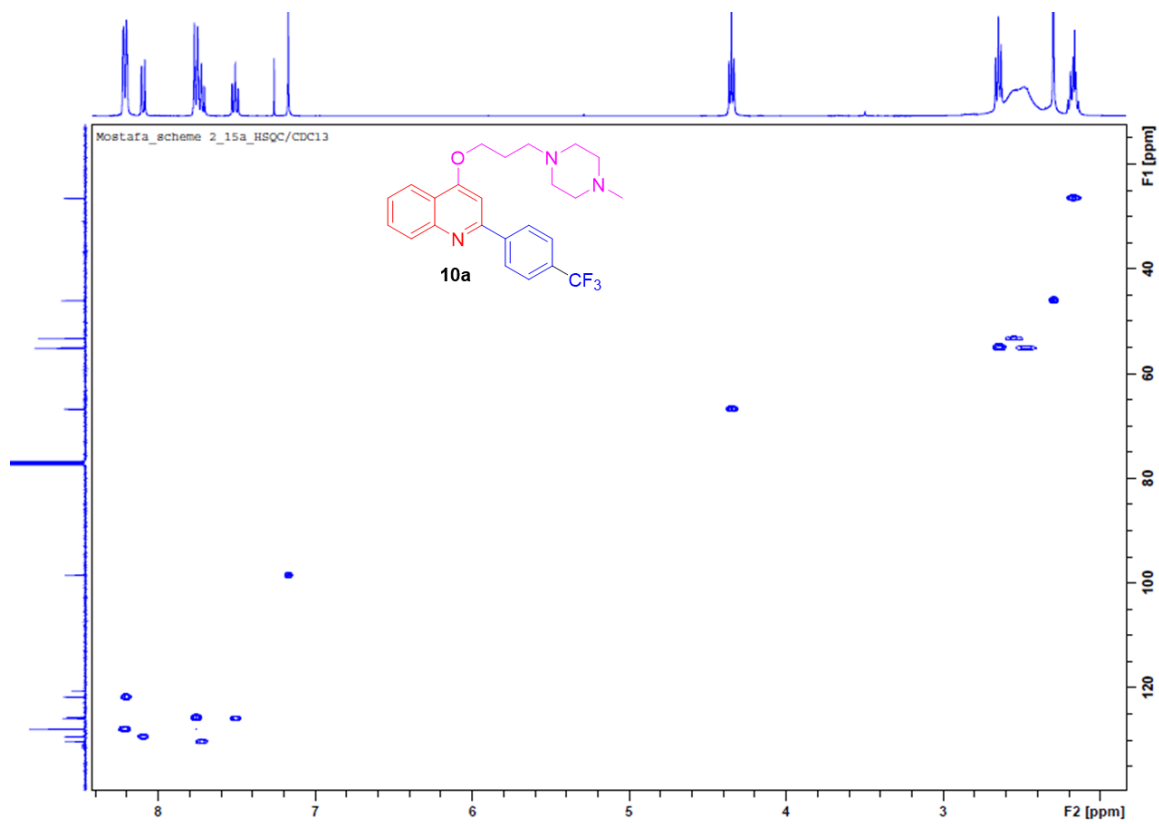

- |        |        |
|--------|--------|
| 8.2271 | 4.3057 |
| 8.2068 | 4.3004 |
| 8.1091 | 4.3652 |
| 8.0884 | 2.9632 |
| 7.7697 | 2.9459 |
| 7.7480 | 2.9286 |
| 7.7297 | 2.5075 |
| 7.7261 | 2.4882 |
| 7.7086 | 2.4814 |
| 7.7052 | 2.4721 |
| 7.5329 | 2.4629 |
| 7.5329 | 2.4491 |
| 7.5127 | 2.4370 |
| 7.5127 | 2.1714 |
| 7.4951 | 2.1653 |
| 7.4951 | 2.1553 |
| 7.4926 | 2.1391 |
| 7.2599 | 2.1228 |
| 7.1880 | 1.9311 |
|        | 1.9055 |
|        | 1.7567 |
|        | 1.7486 |
|        | 1.7399 |
|        | 1.7240 |
|        | 1.7080 |
|        | 1.6985 |
|        | 1.6283 |
|        | 1.6142 |
|        | 1.6064 |
|        | 1.3157 |
|        | 1.3076 |
|        | 1.2998 |
|        | 1.2772 |
|        | 1.2522 |
|        | 1.2460 |
|        | 1.1990 |
|        | 1.1822 |
|        | 1.1694 |
|        | 1.1616 |
|        | 1.1471 |

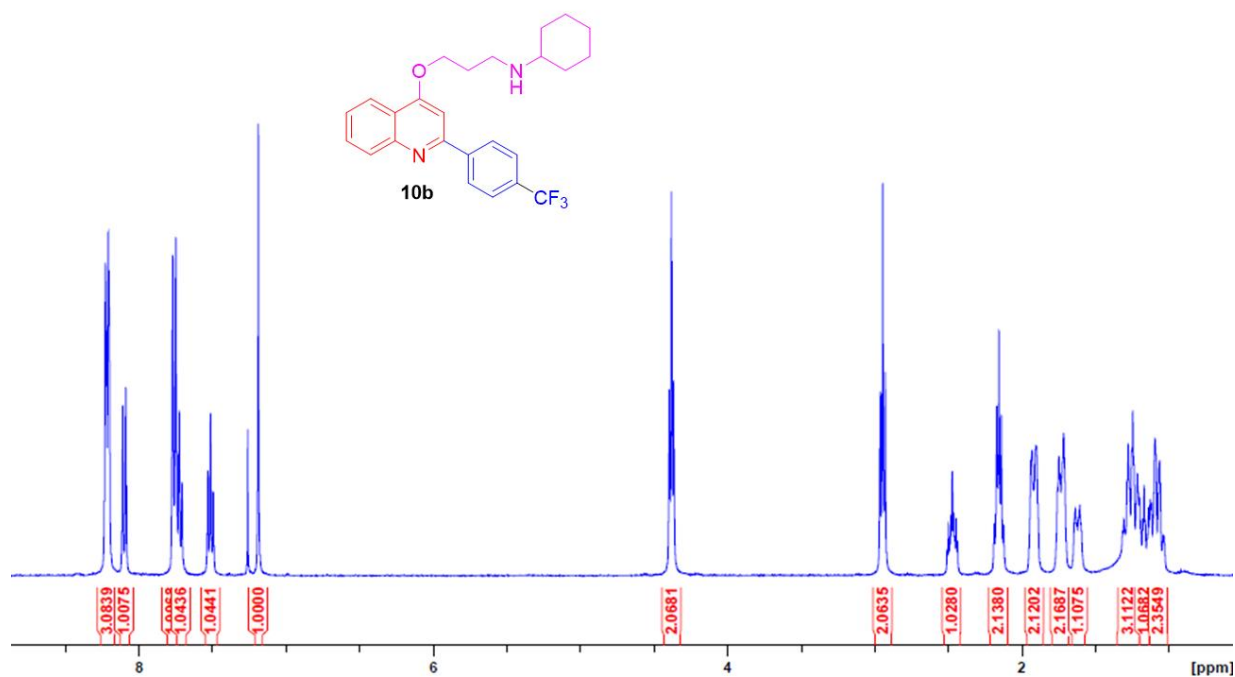

- |        |        |
|--------|--------|
| 3.0839 | 2.0681 |
| 1.0075 |        |
| 1.0436 |        |
| 1.0441 |        |
| 1.0000 |        |
|        | 2.0635 |
|        | 1.0280 |
|        | 2.1380 |
|        | 2.1202 |
|        | 2.1687 |
|        | 1.1075 |
|        | 3.1122 |
|        | 1.0582 |
|        | 2.3549 |

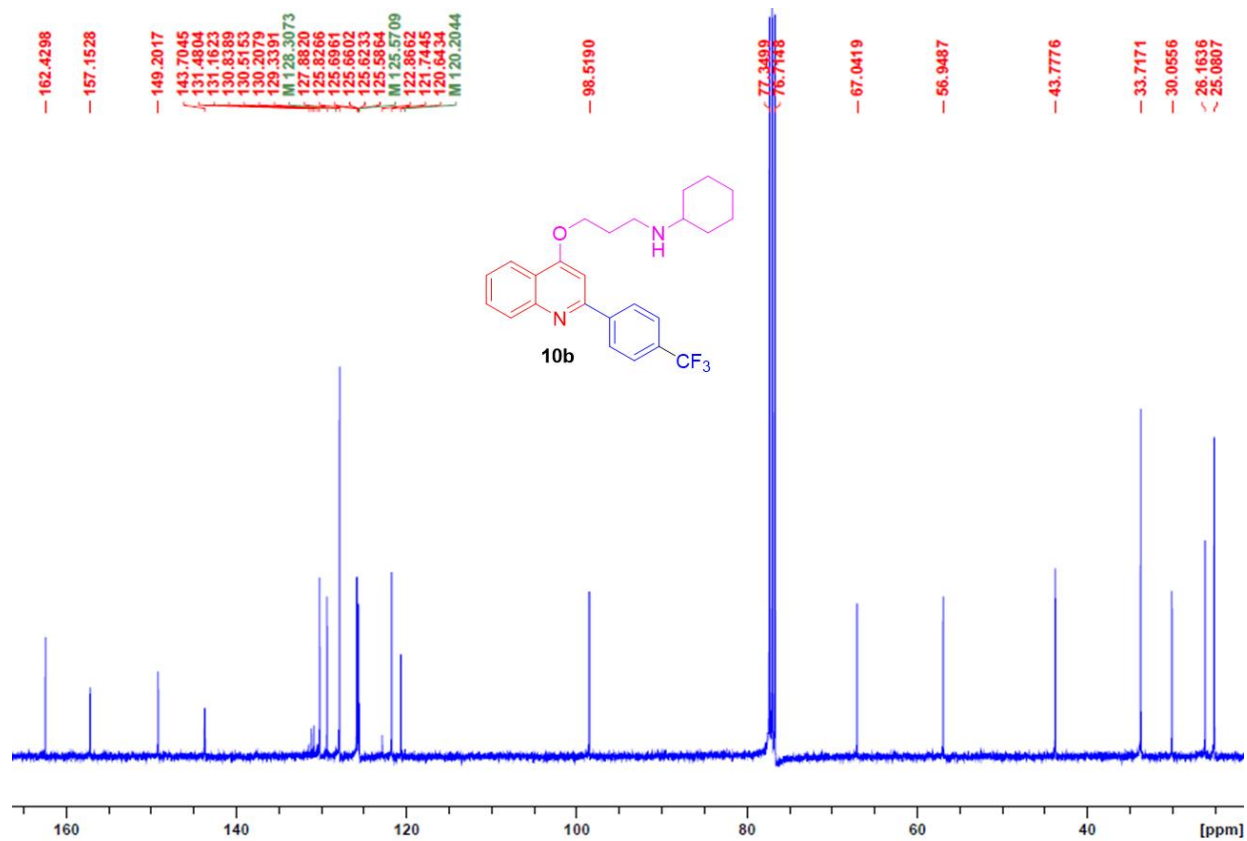

\_19F/CDC13

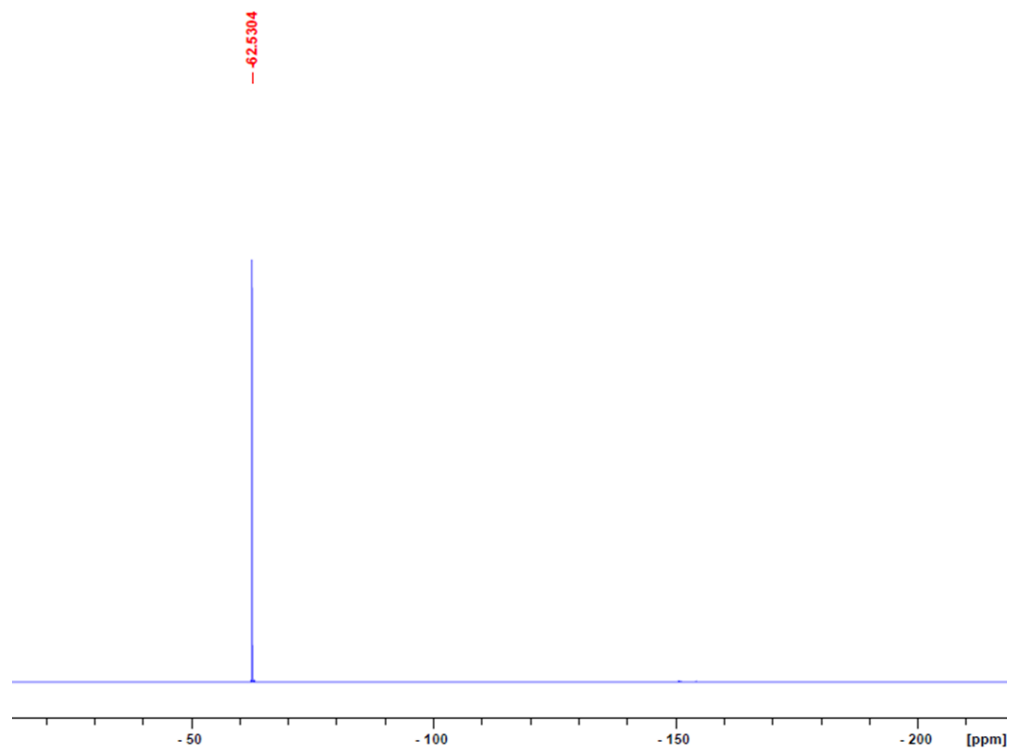

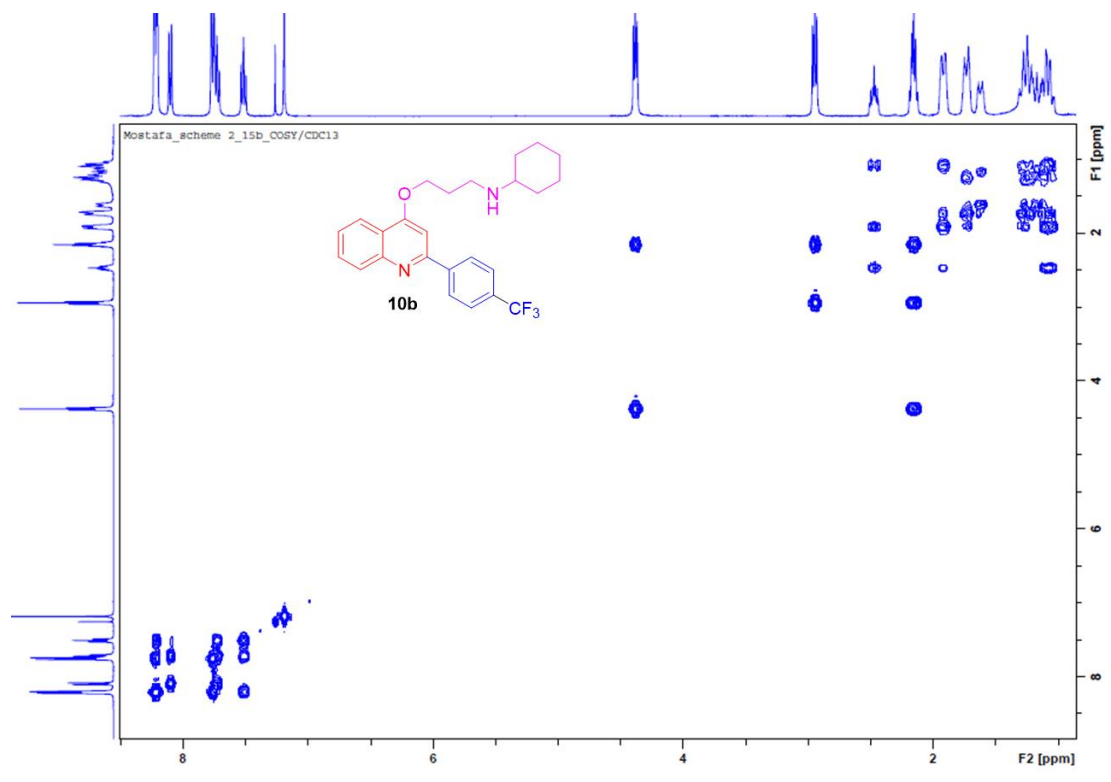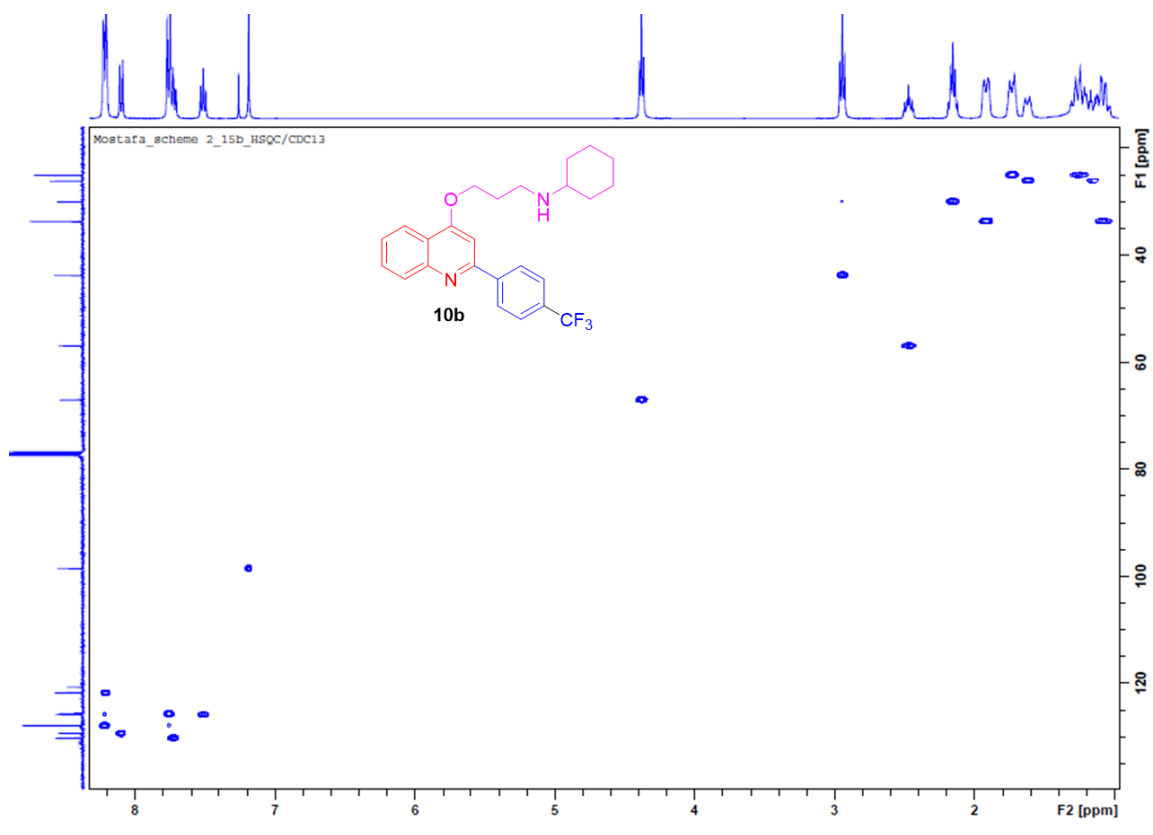

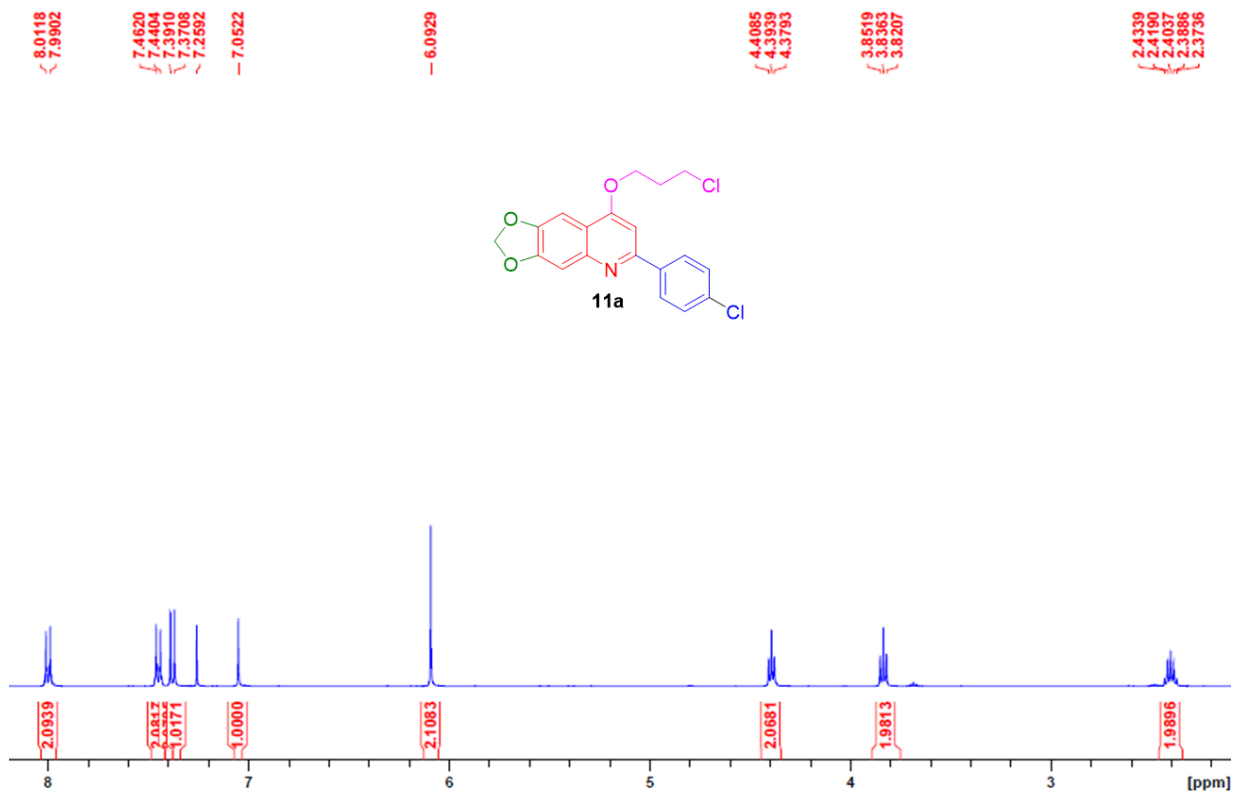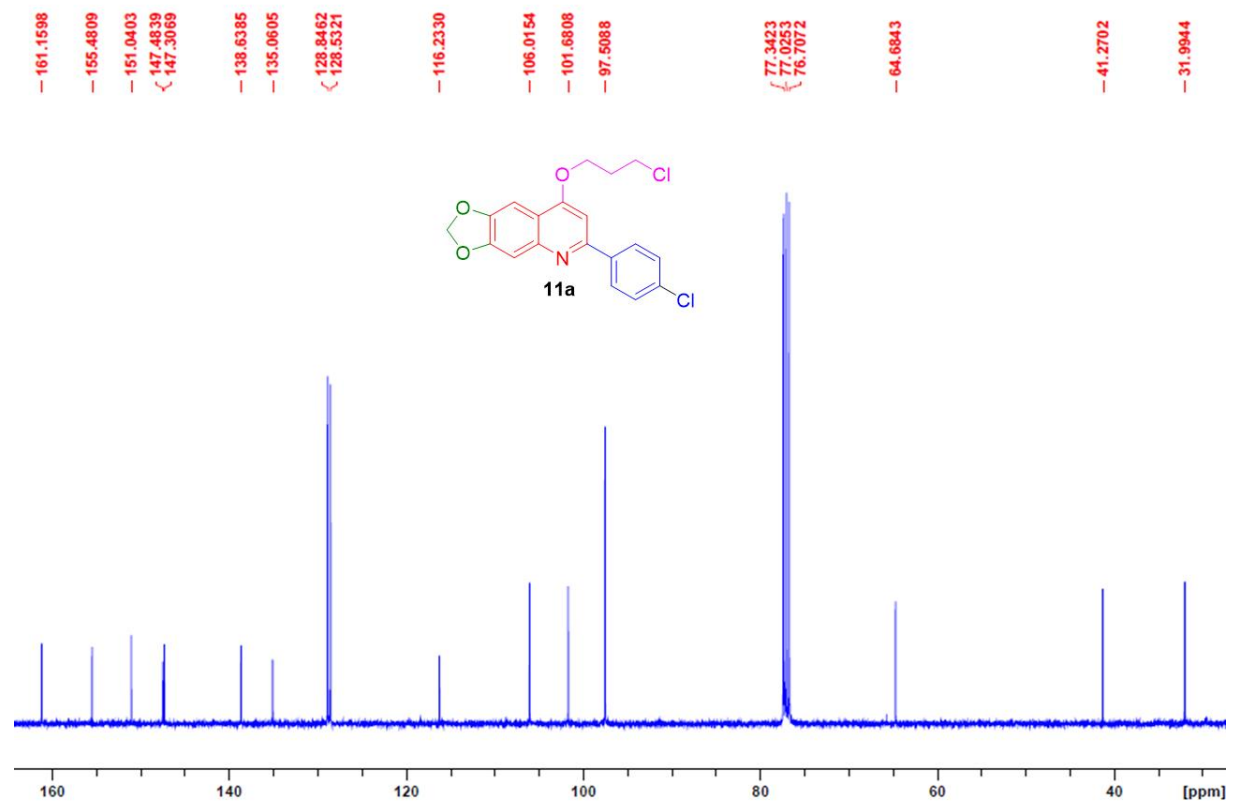

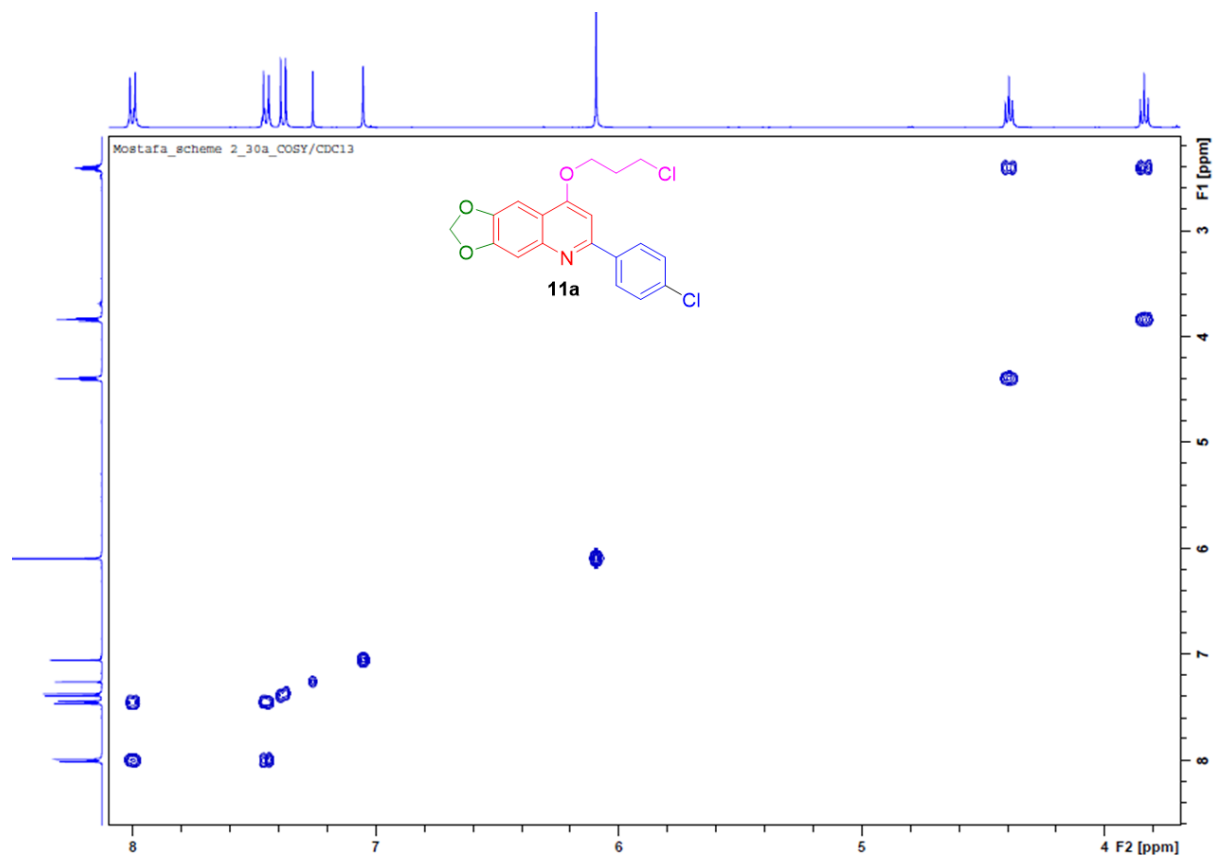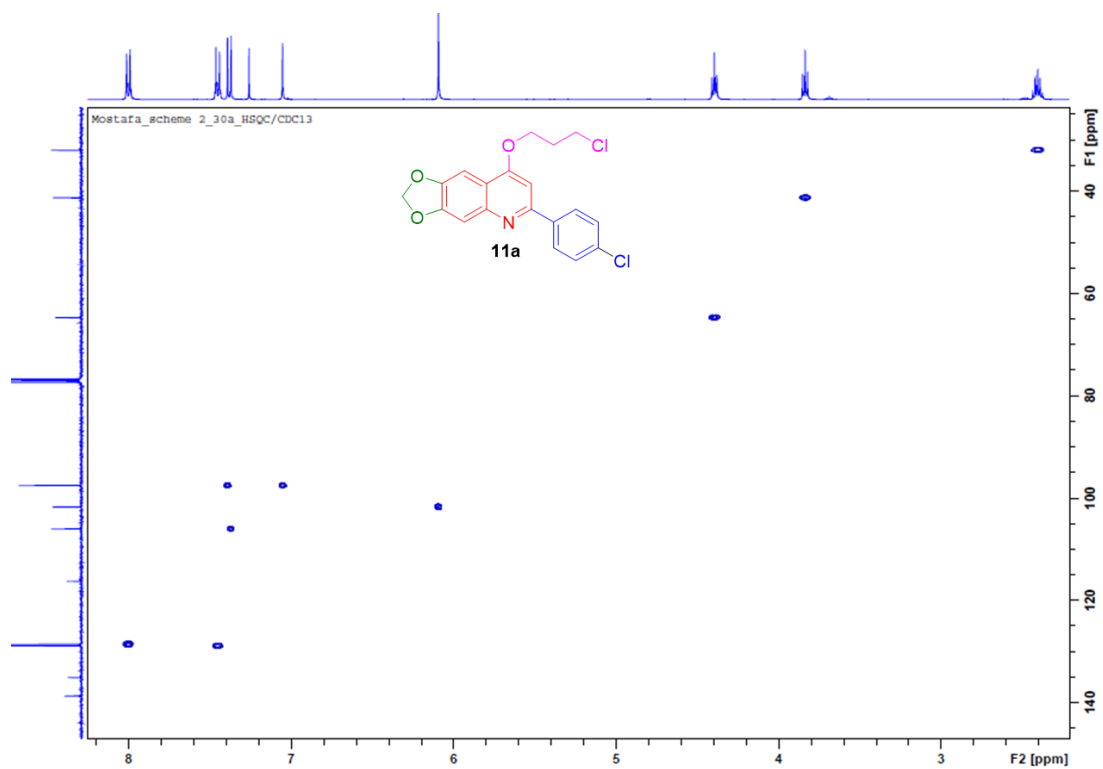

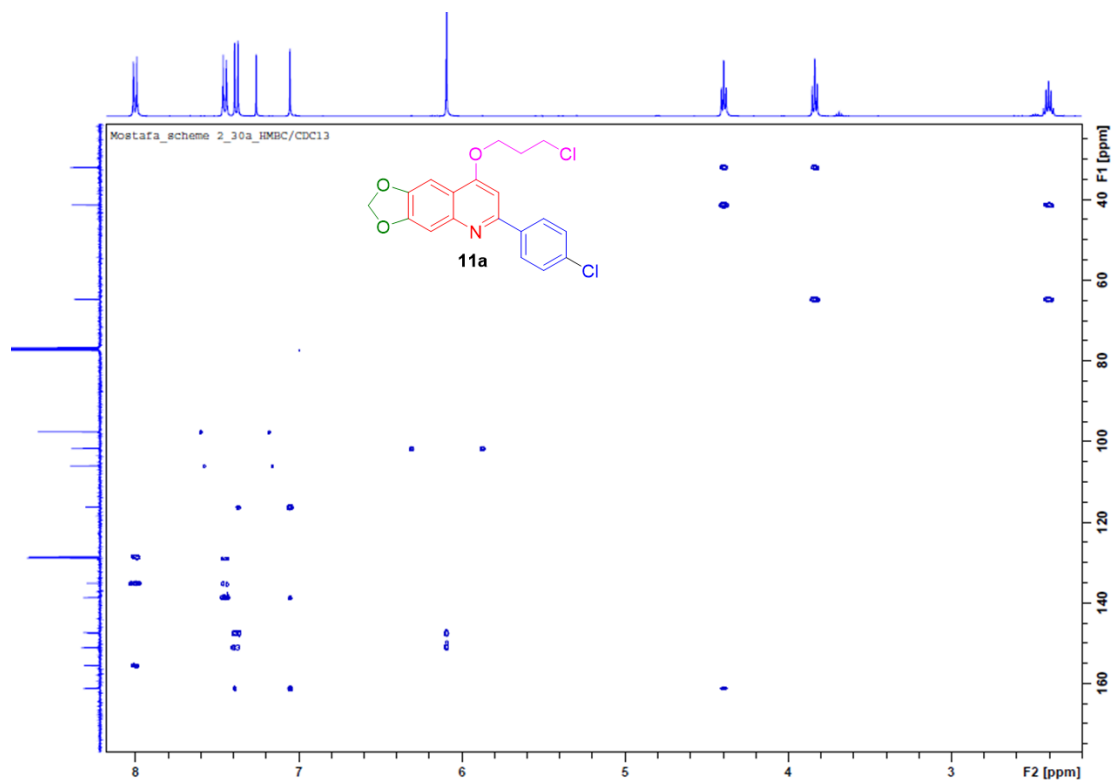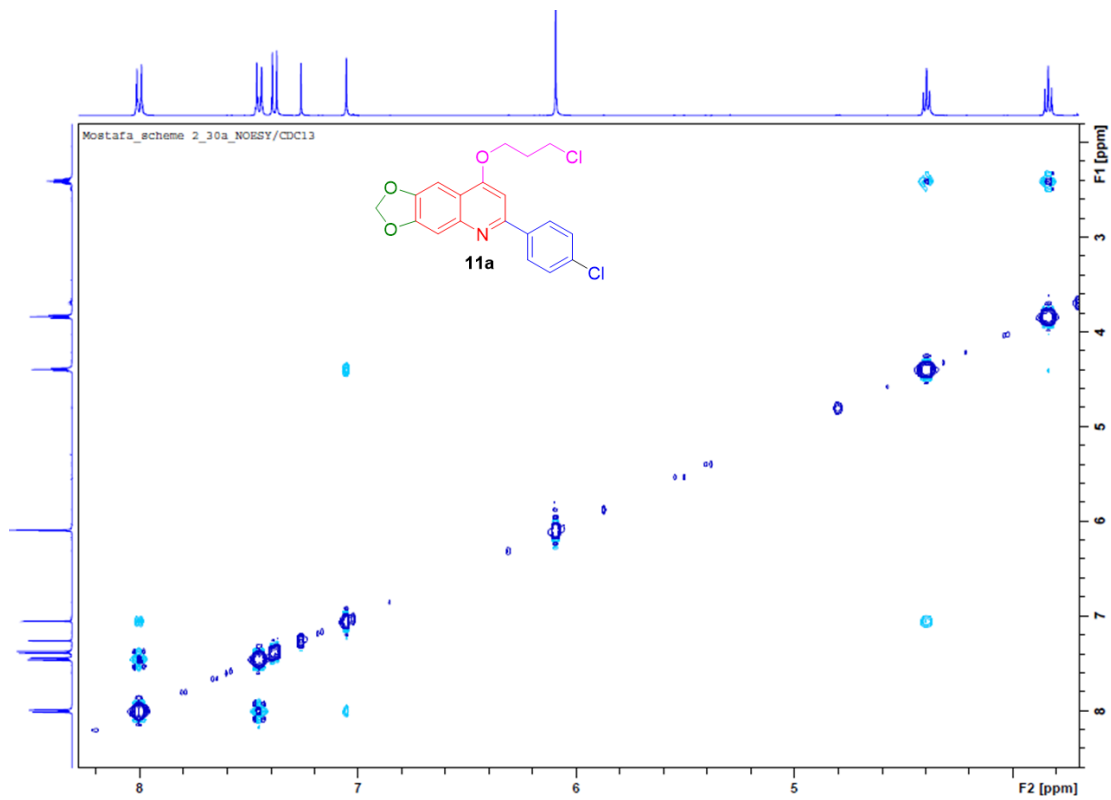

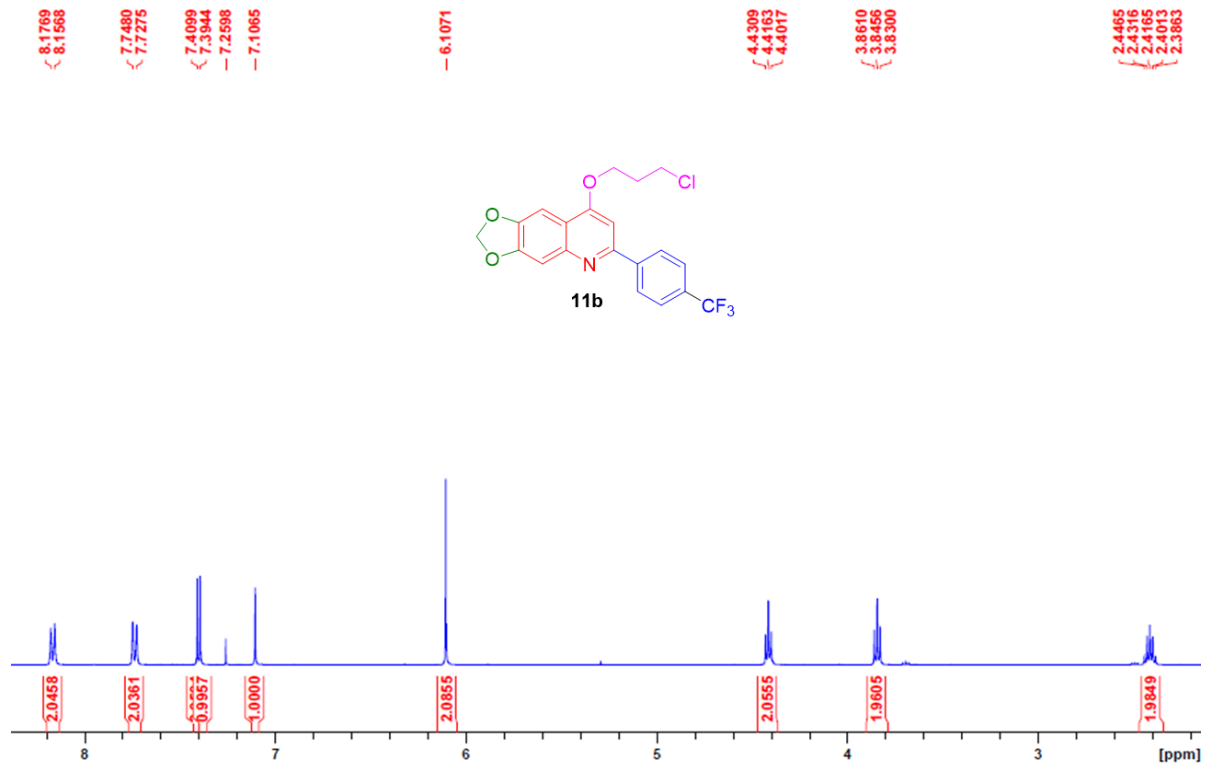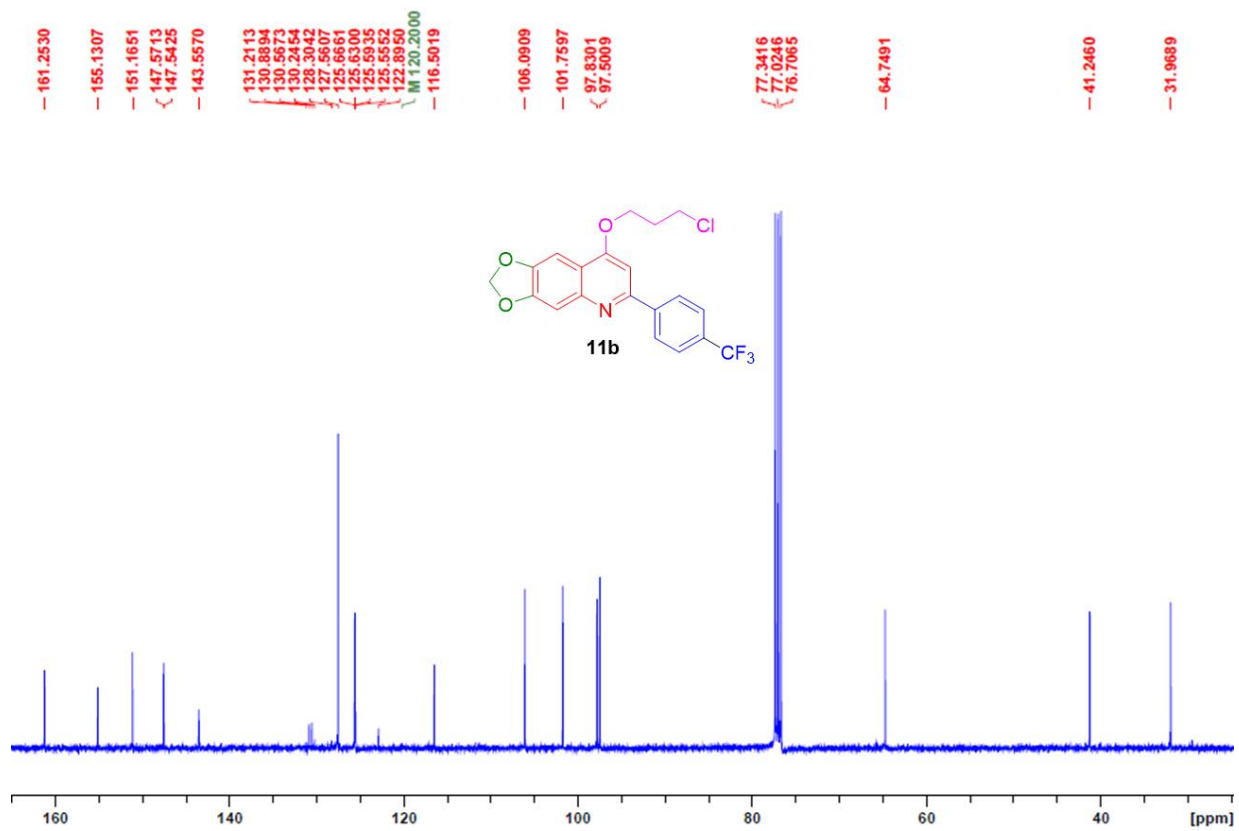

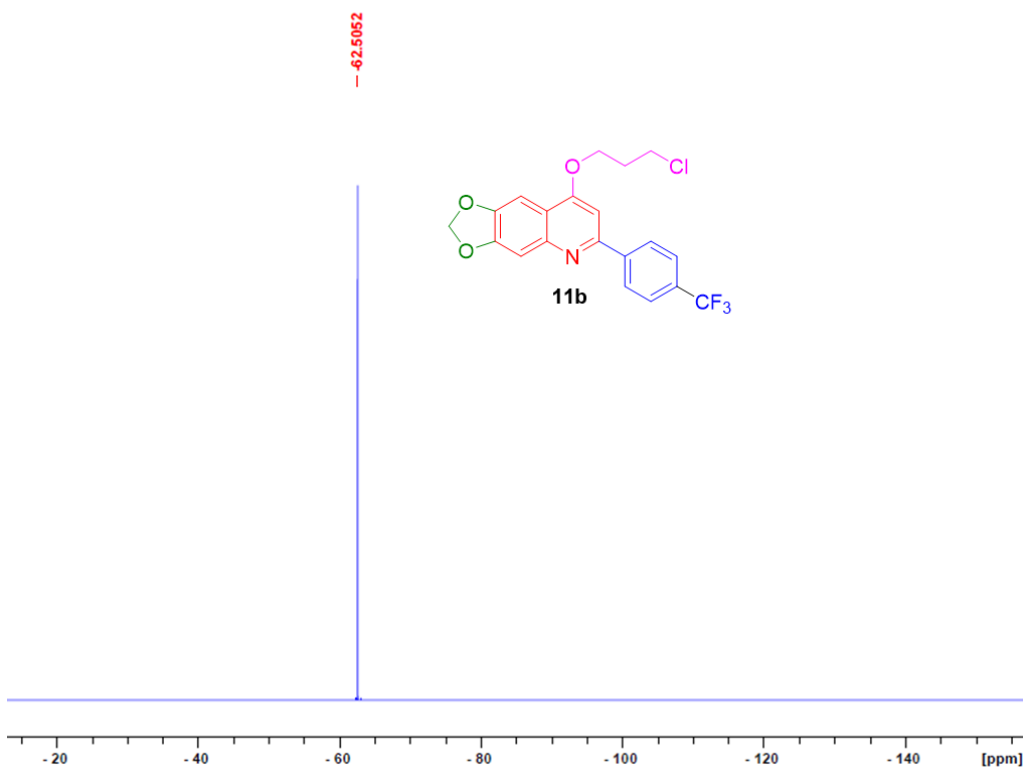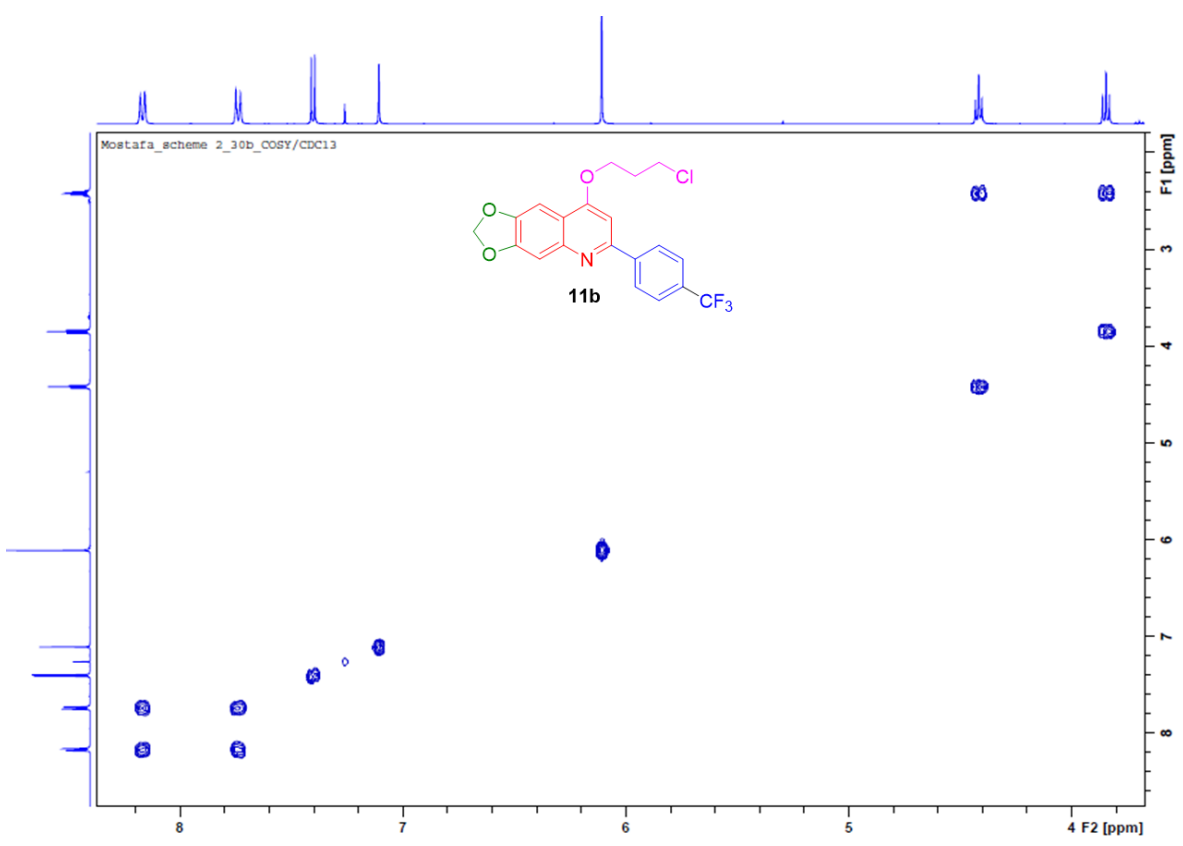



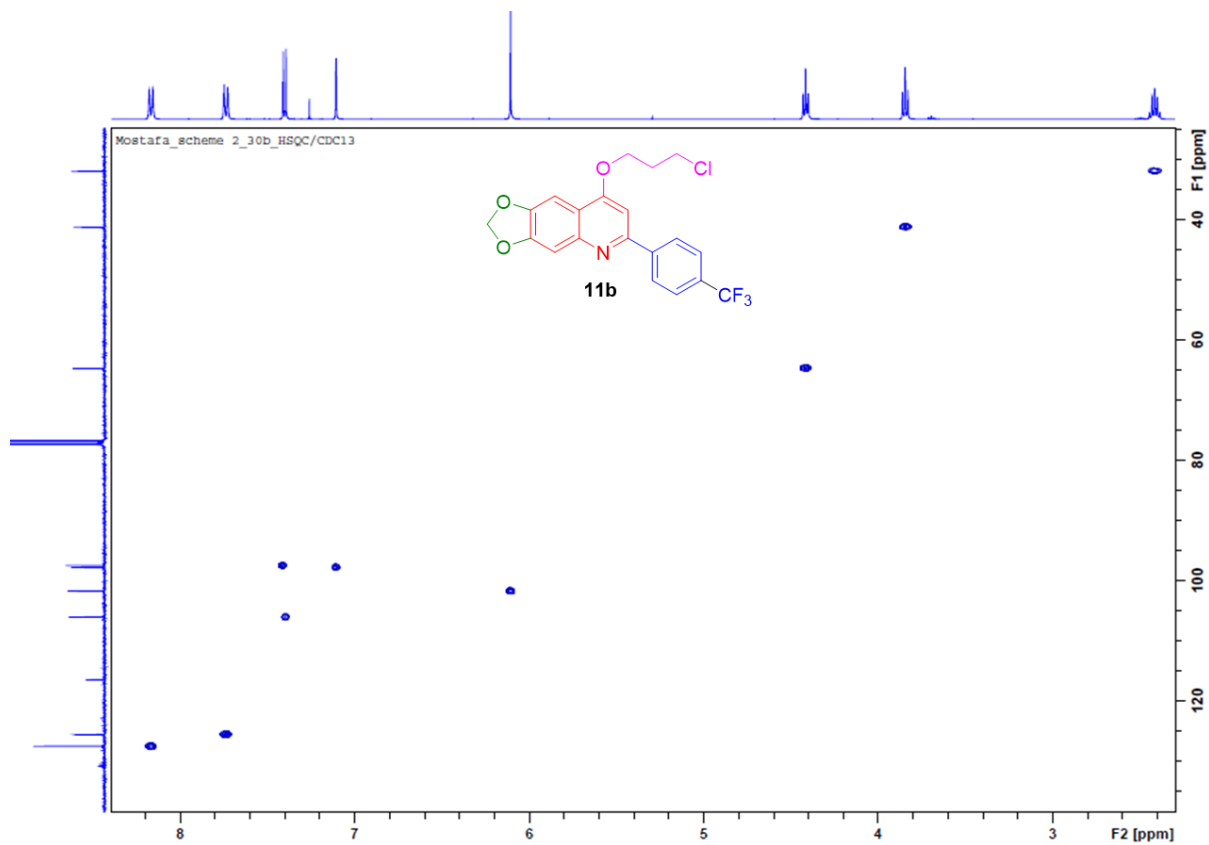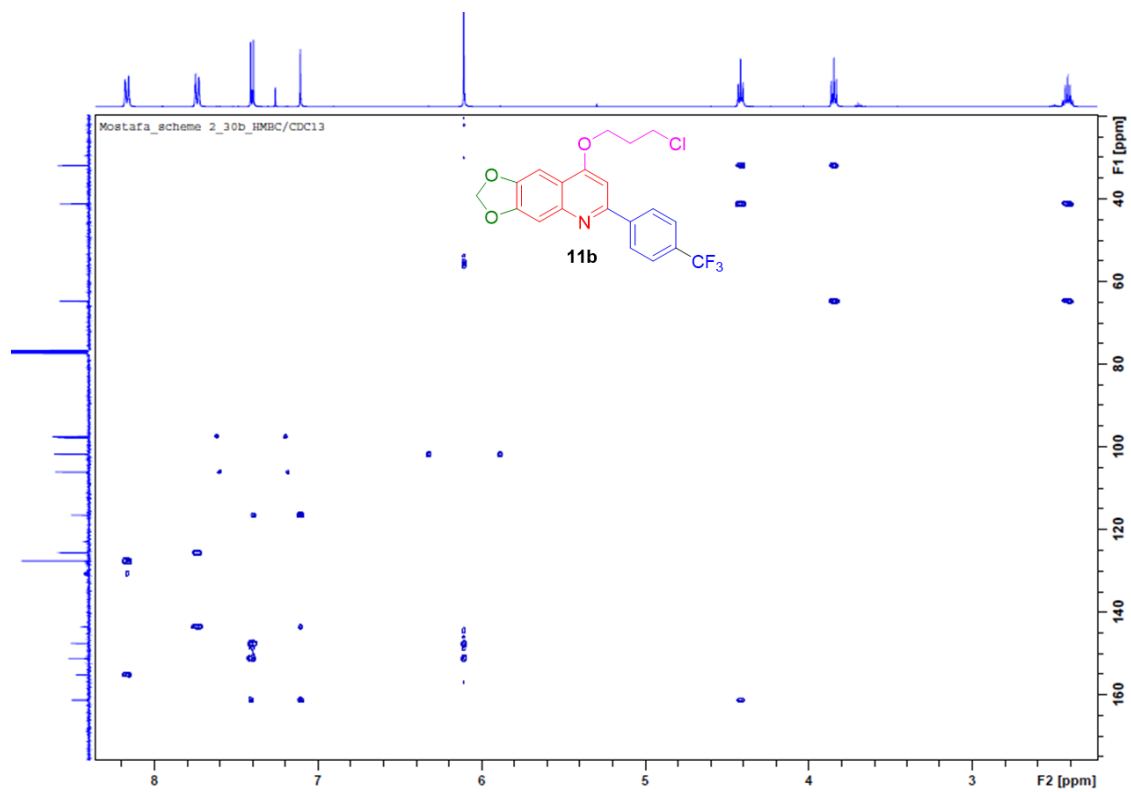

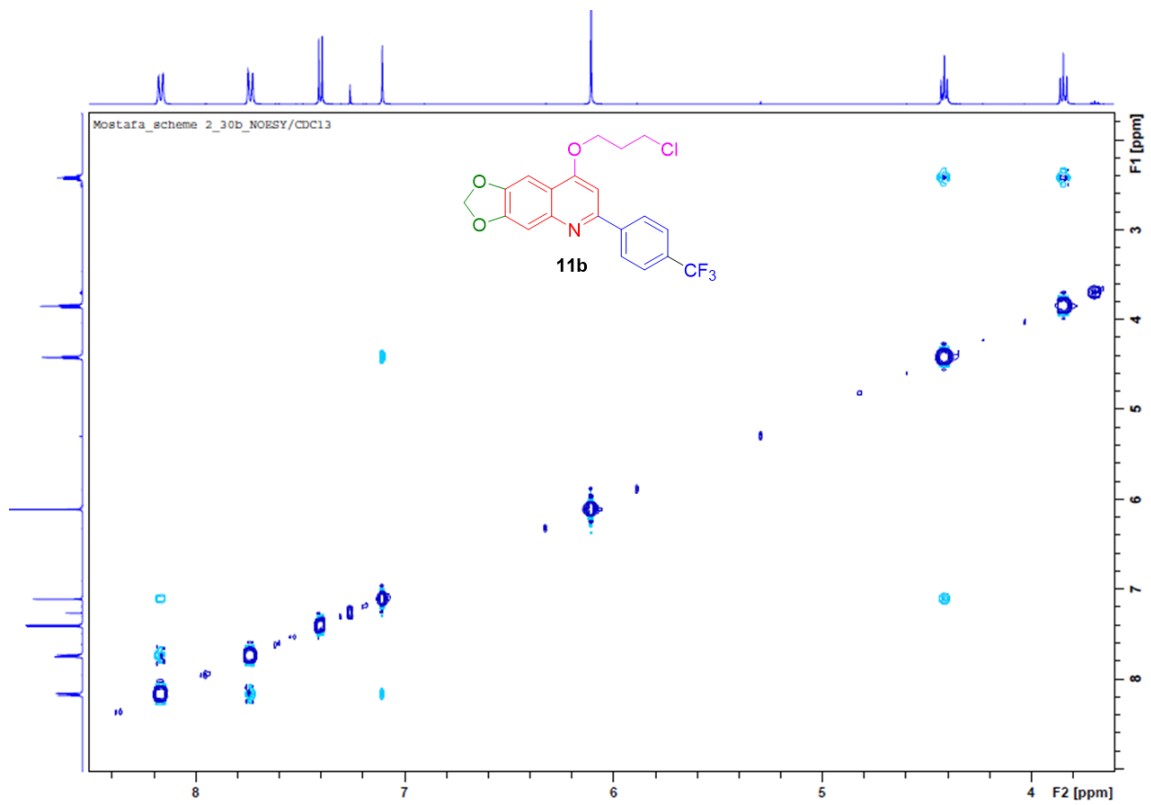

7.9698  
7.9482

7.4915  
7.4451  
7.4234  
7.3894  
7.3626  
7.2998

7.0768  
6.9418  
6.9325

6.1092

5.2881

4.3002  
4.2835  
4.1979  
4.1830  
4.1496

2.4262  
2.4104  
2.3953  
2.3803  
2.3644

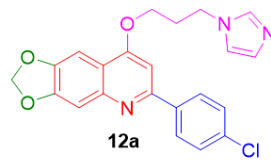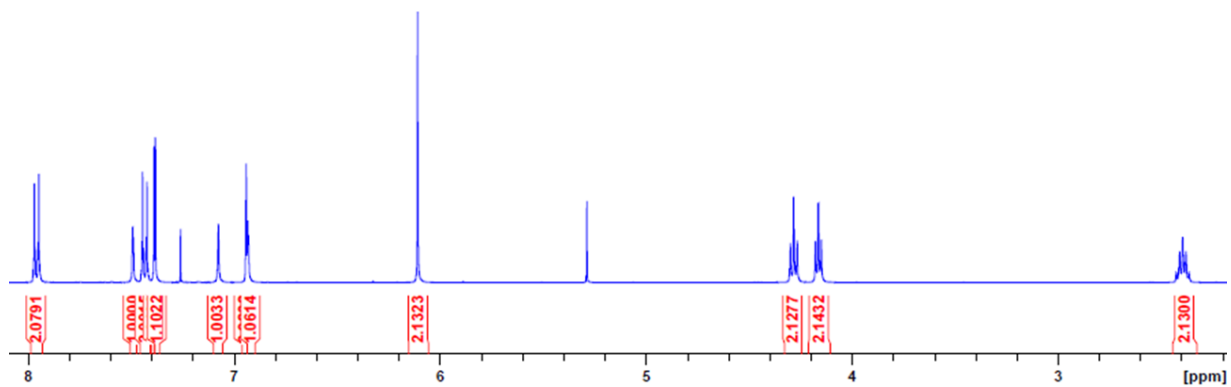

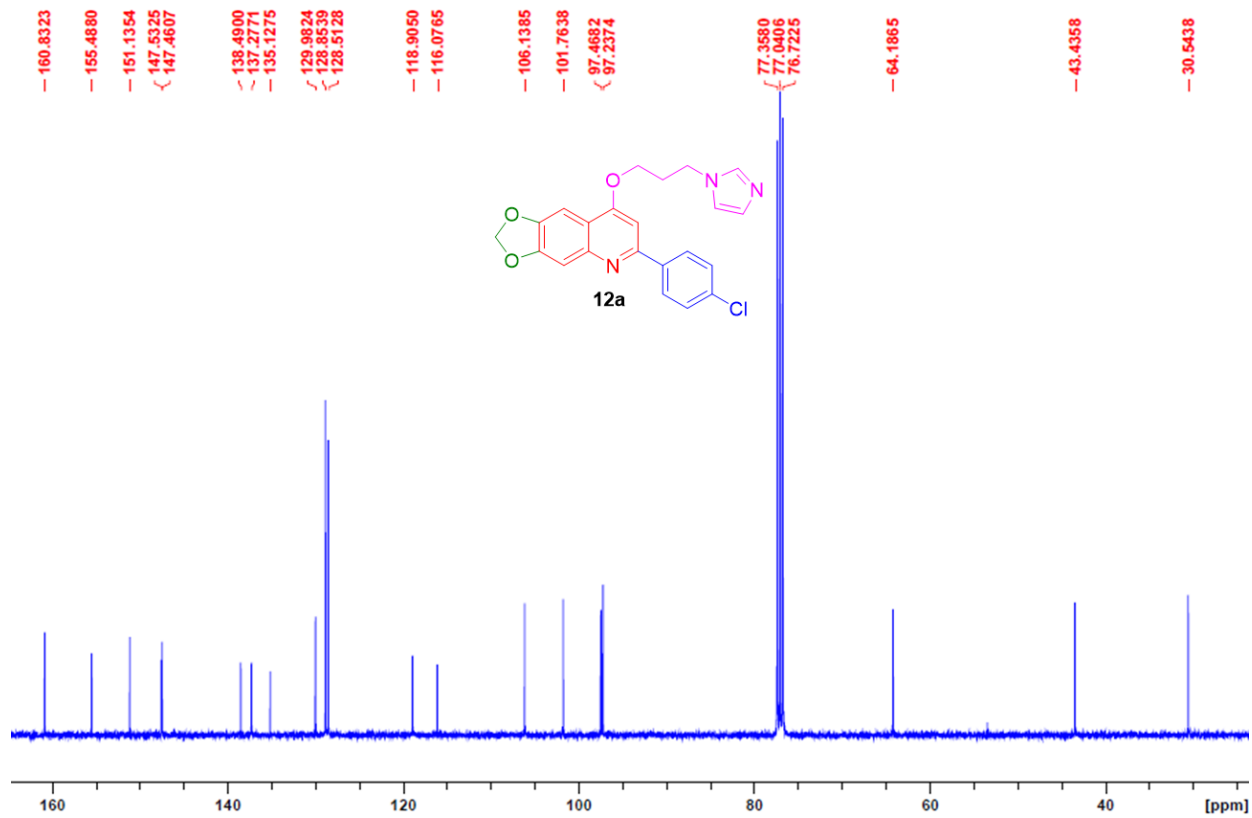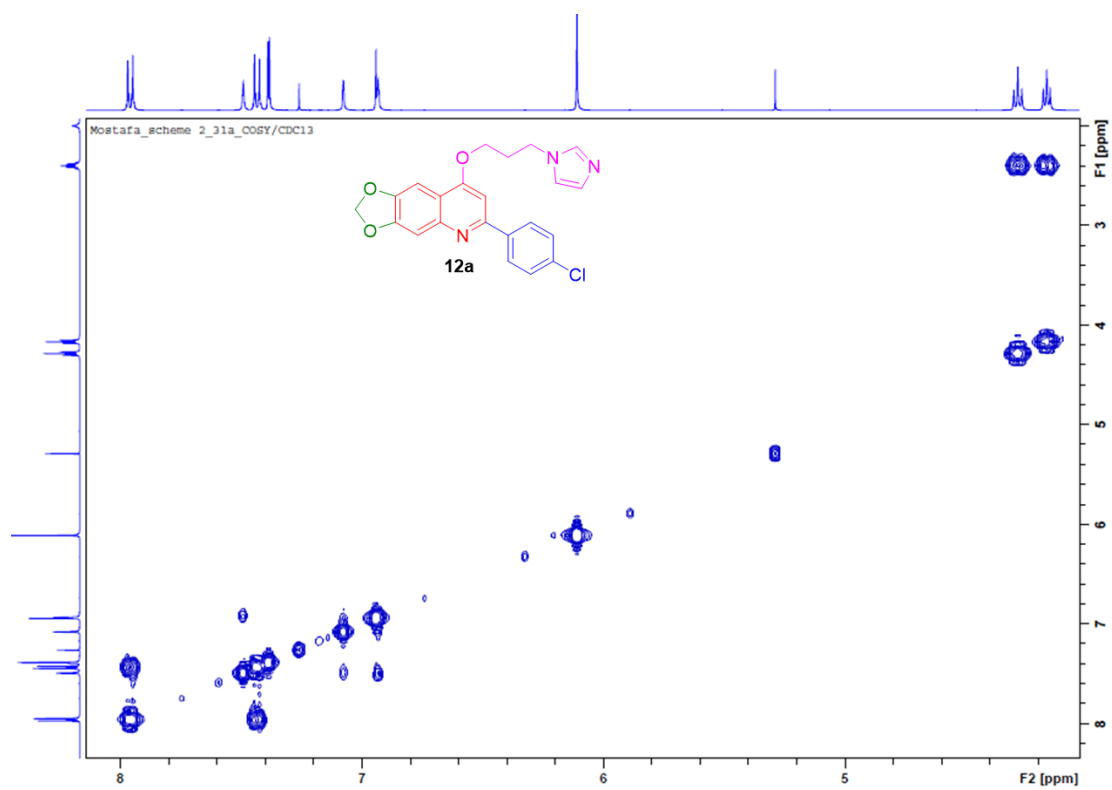

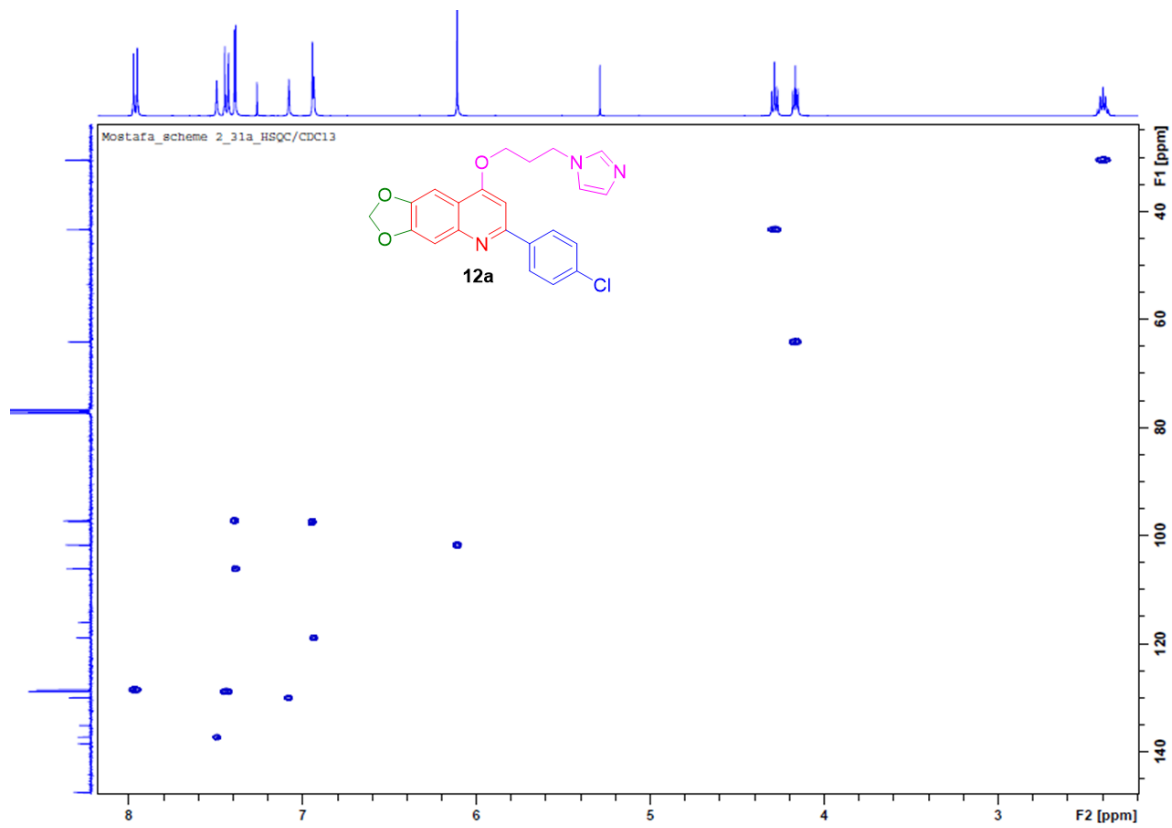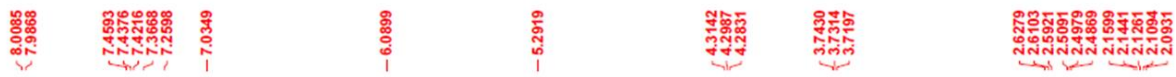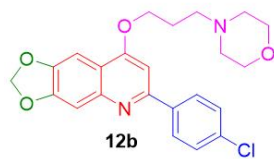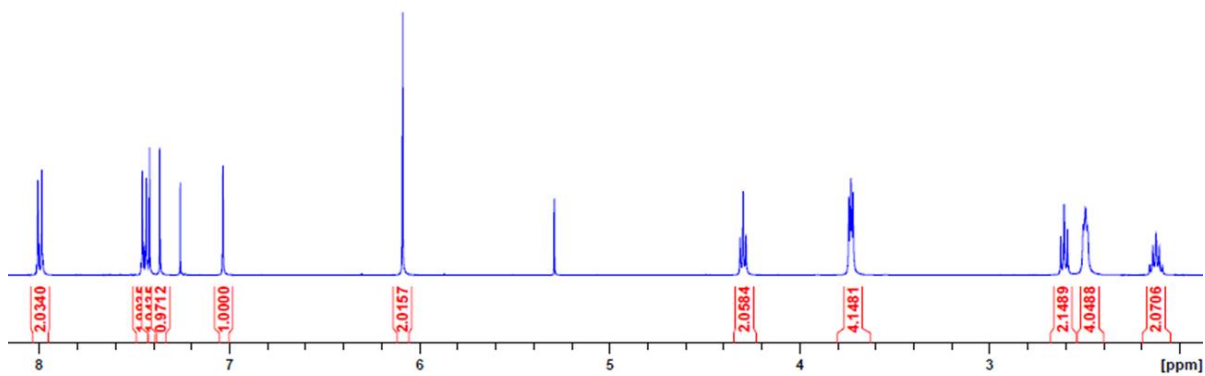

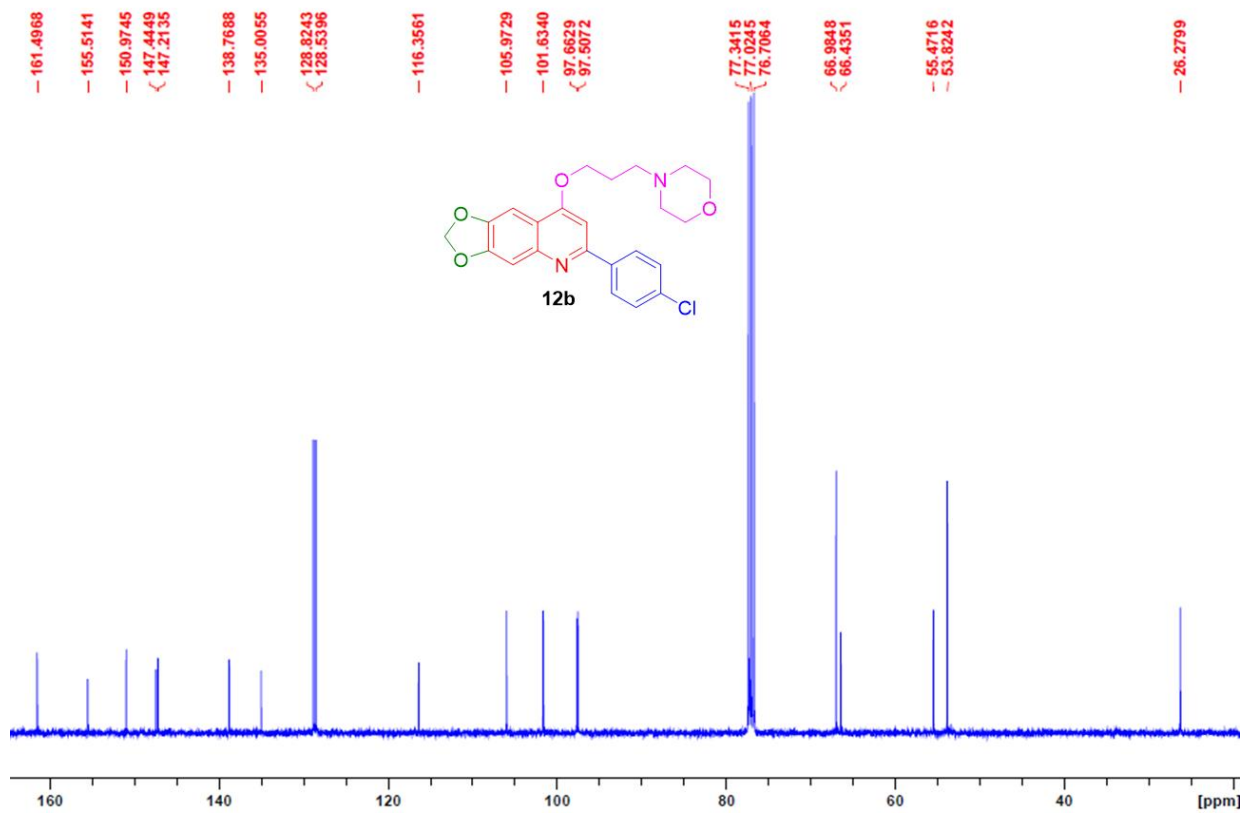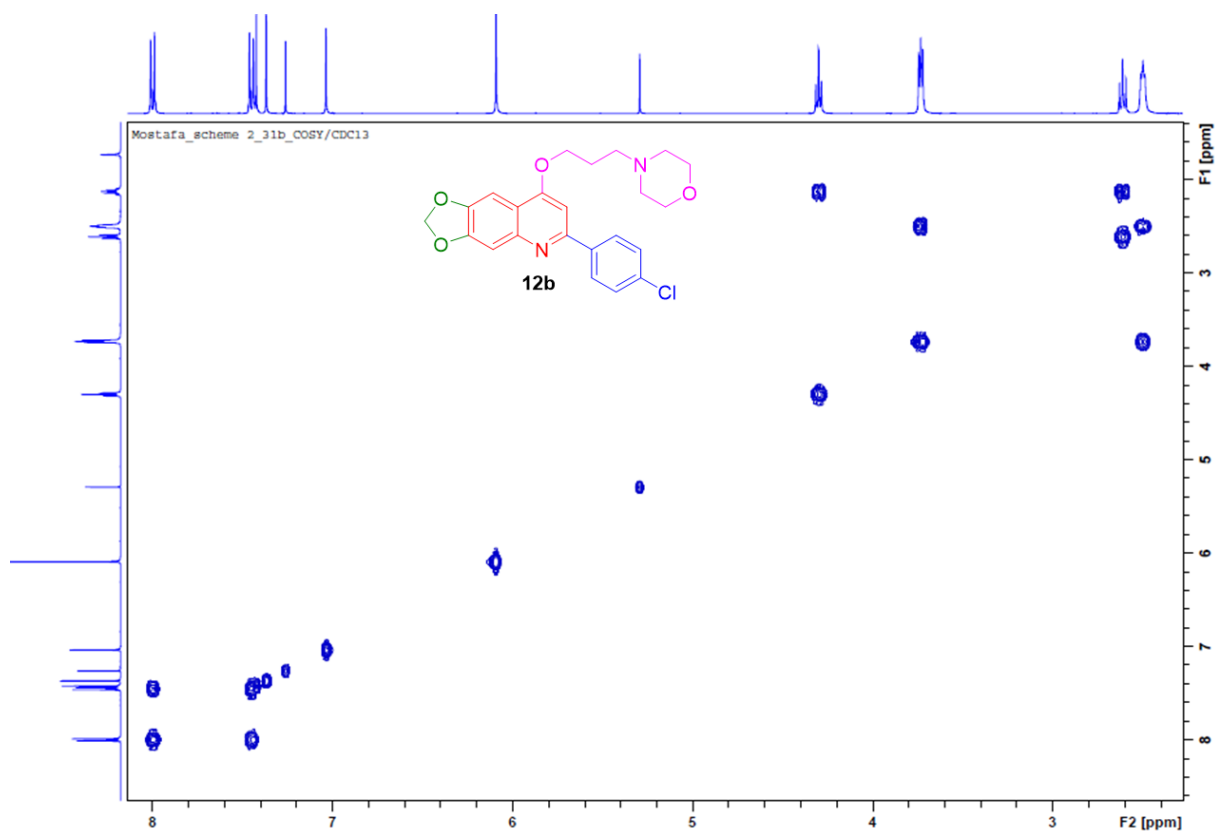

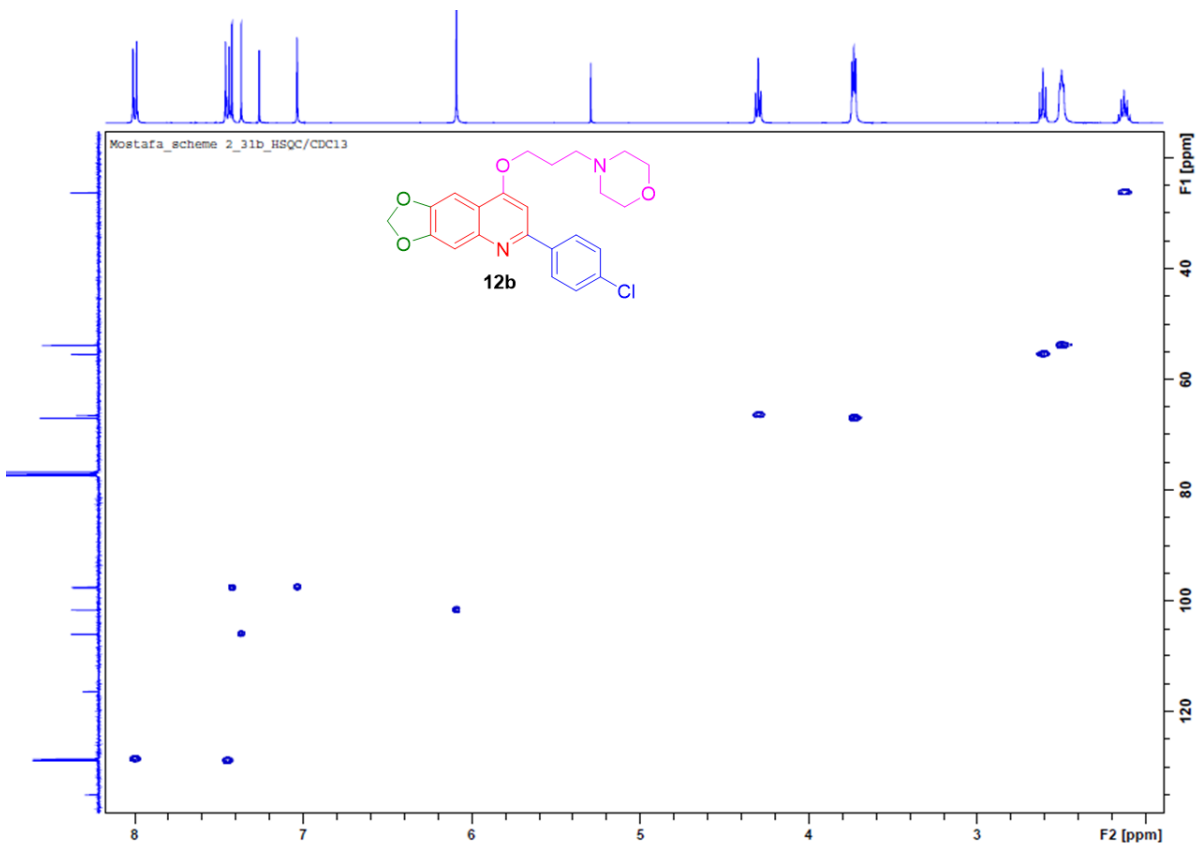

8.1386  
8.1182  
7.7330  
7.7123  
7.4981  
7.4101  
7.2598  
7.0824  
7.0001  
6.9398  
6.1252  
5.2896  
4.3138  
4.2971  
4.2805  
4.2043  
4.1901  
4.1758  
2.4445  
2.4290  
2.4137  
2.3986  
2.3828

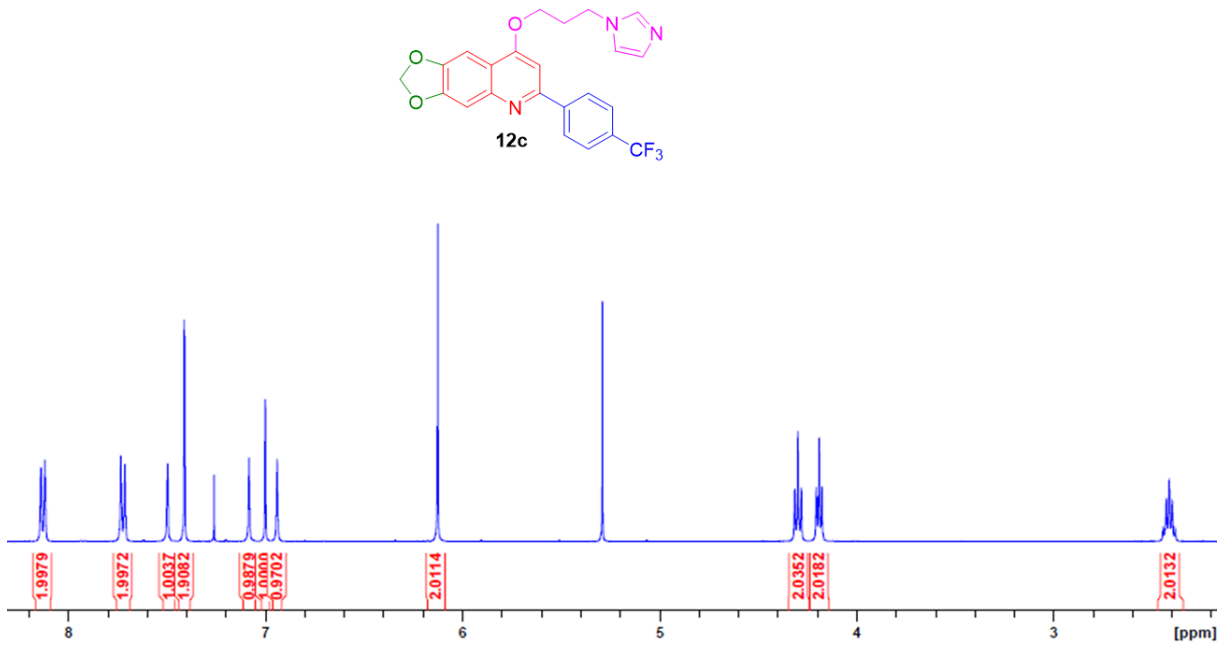

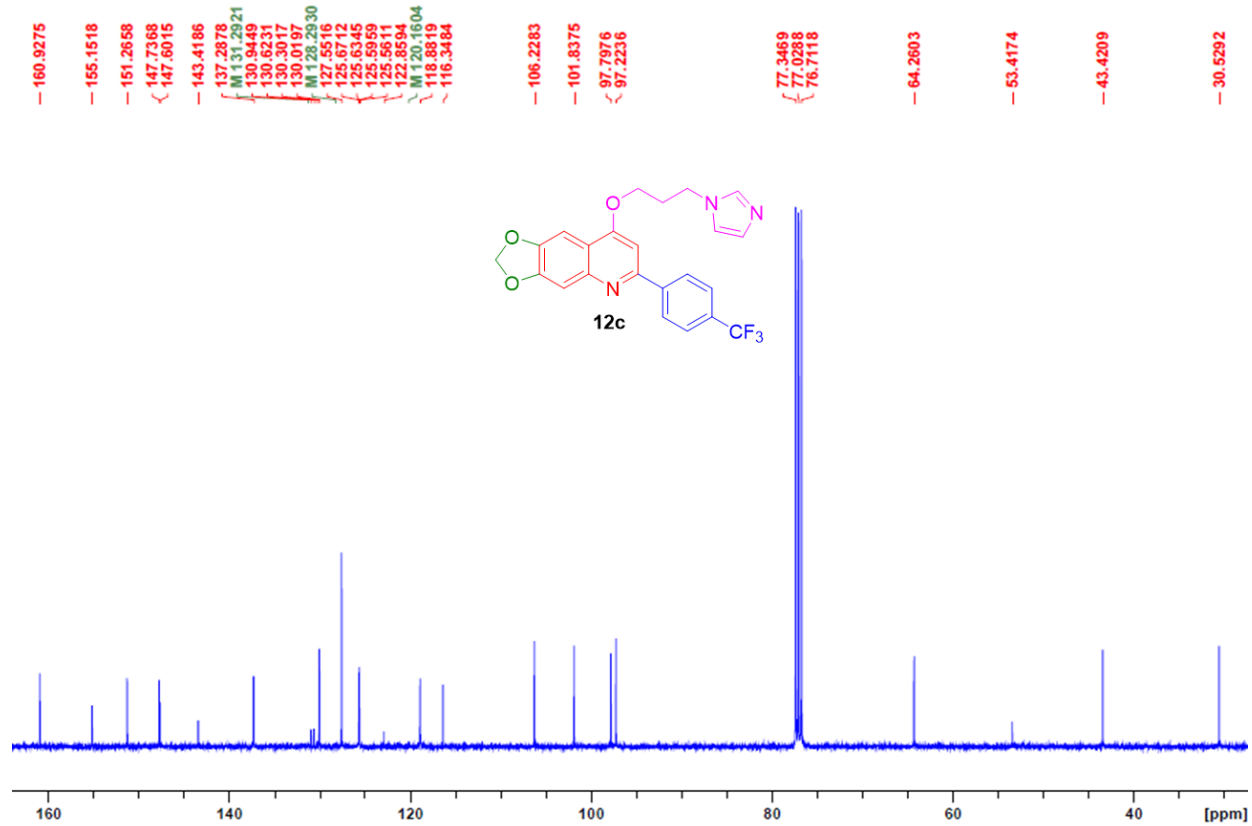

\_19P/CDC13

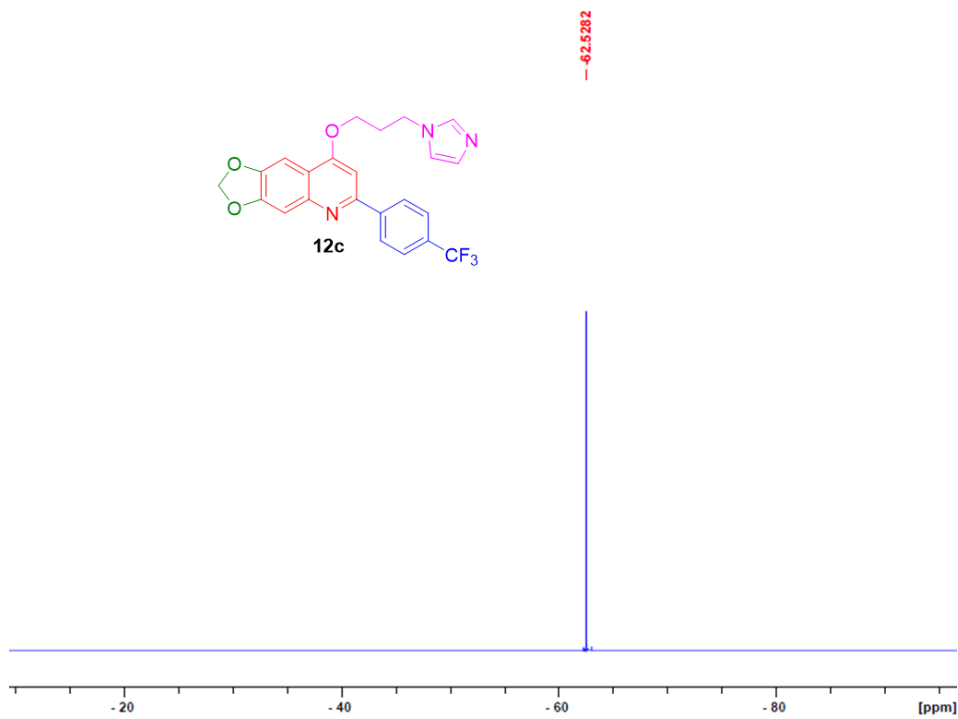

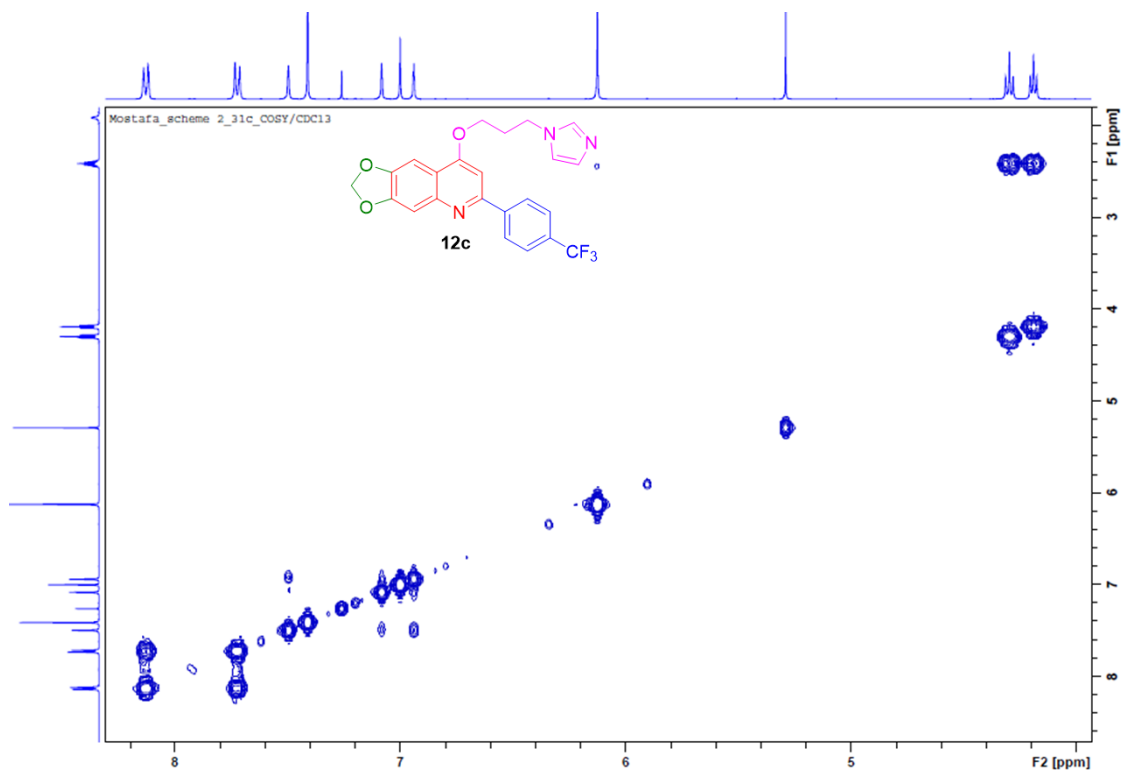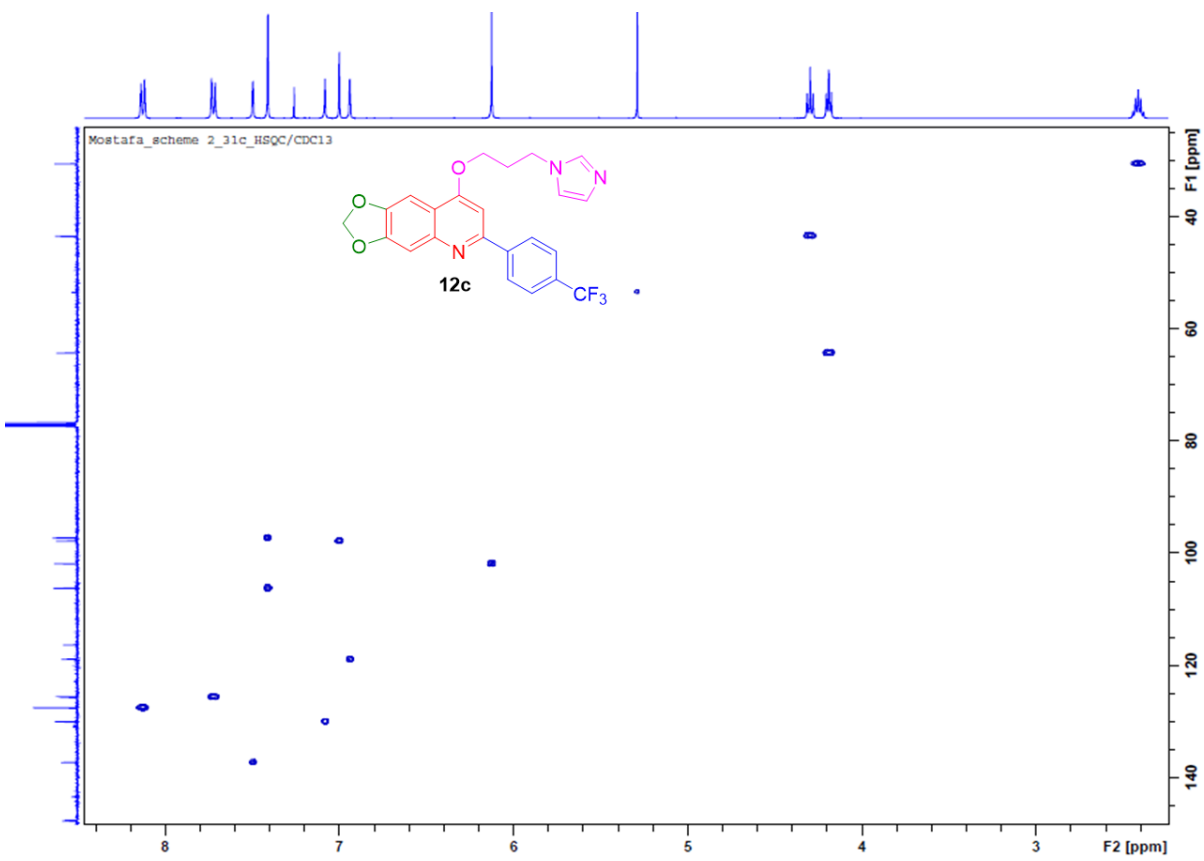



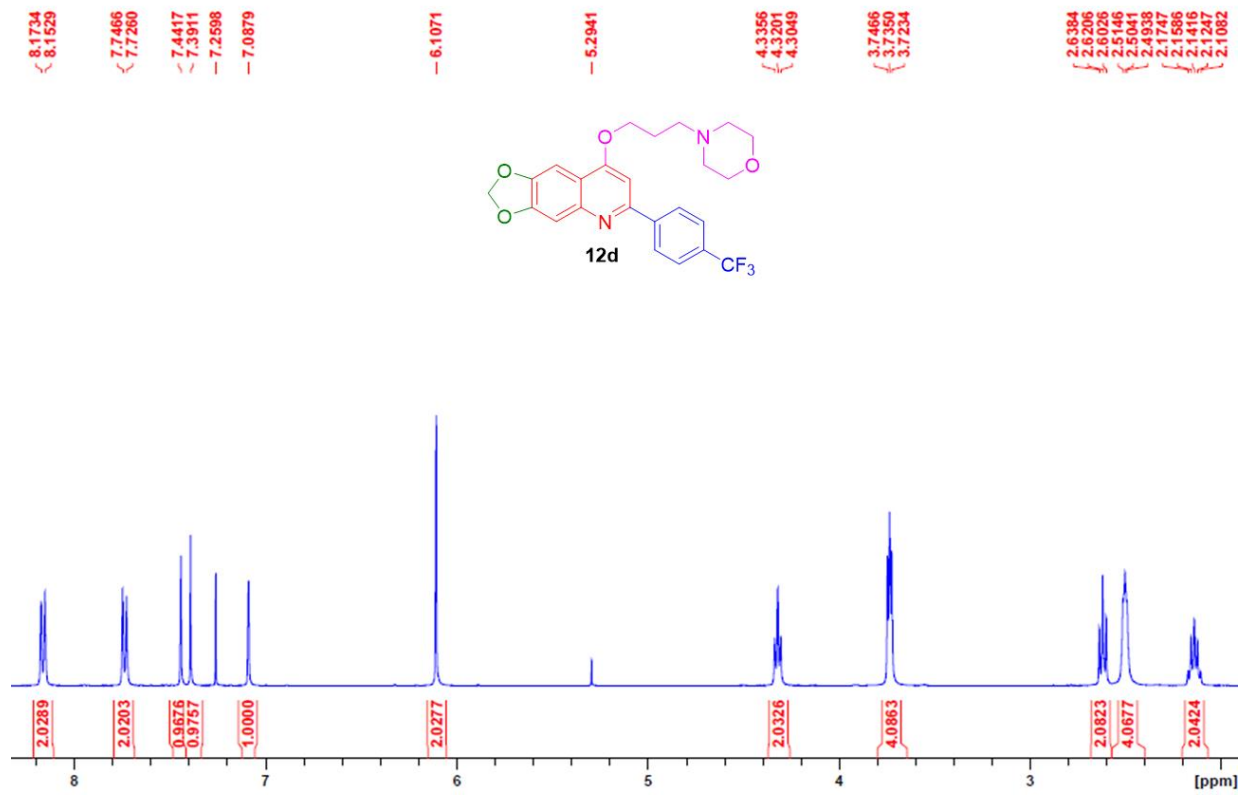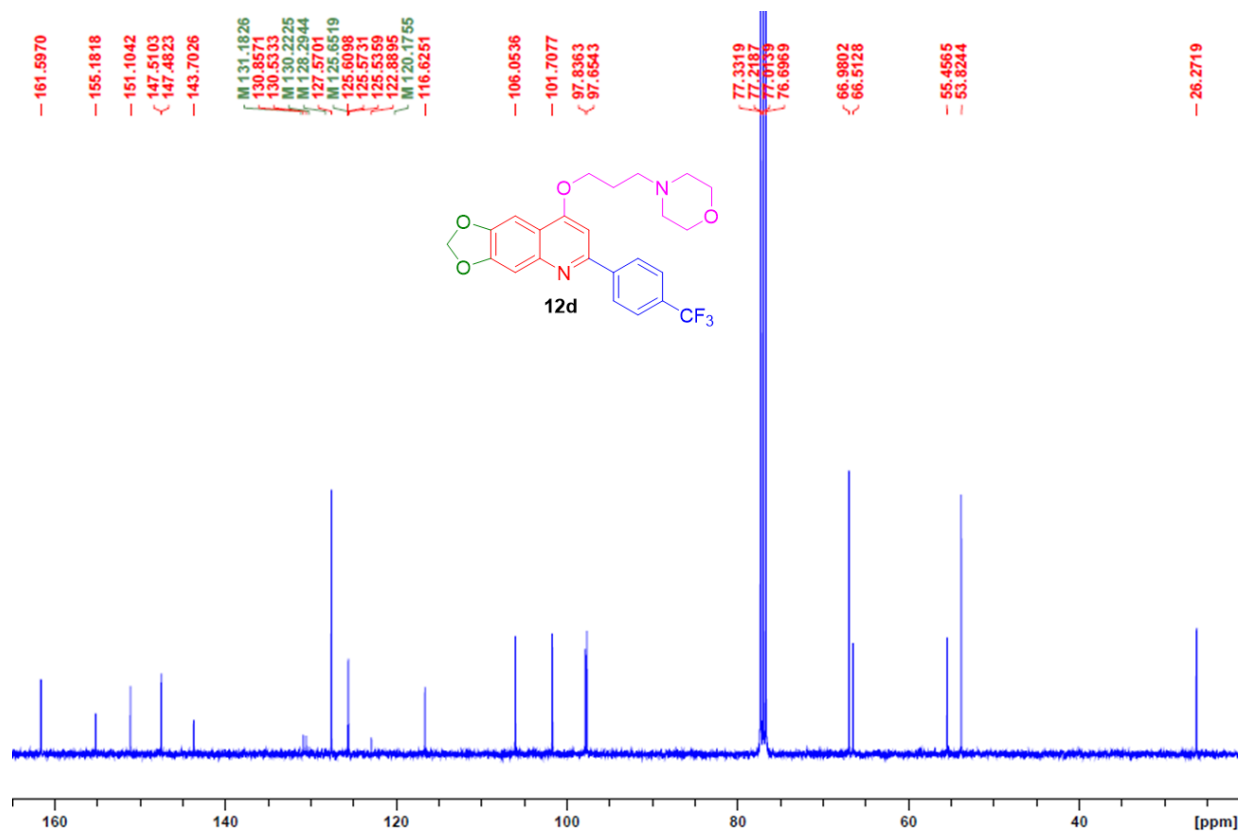

\_19F/CDC13

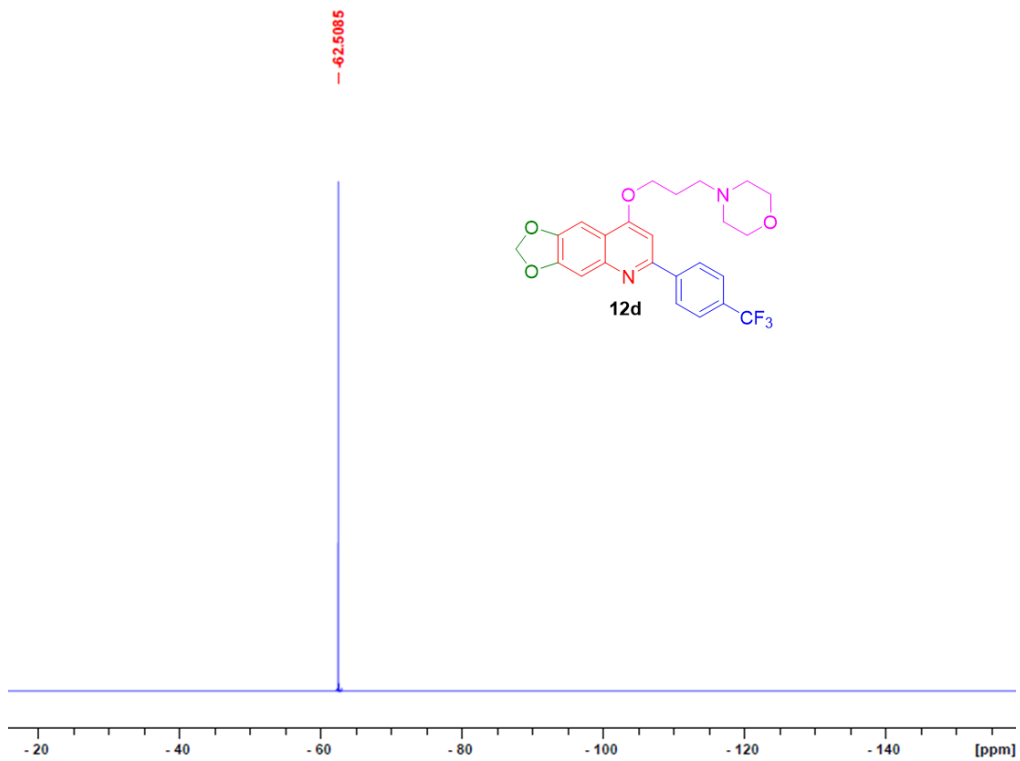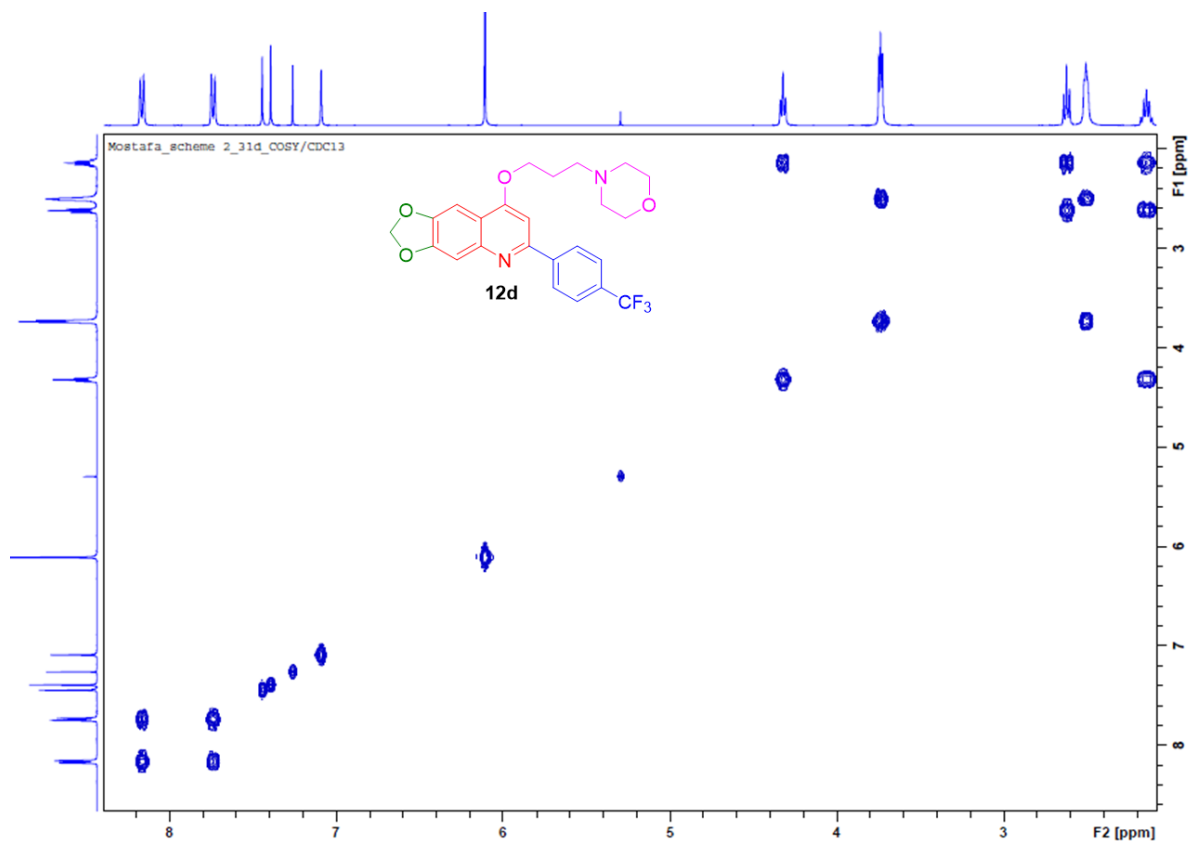

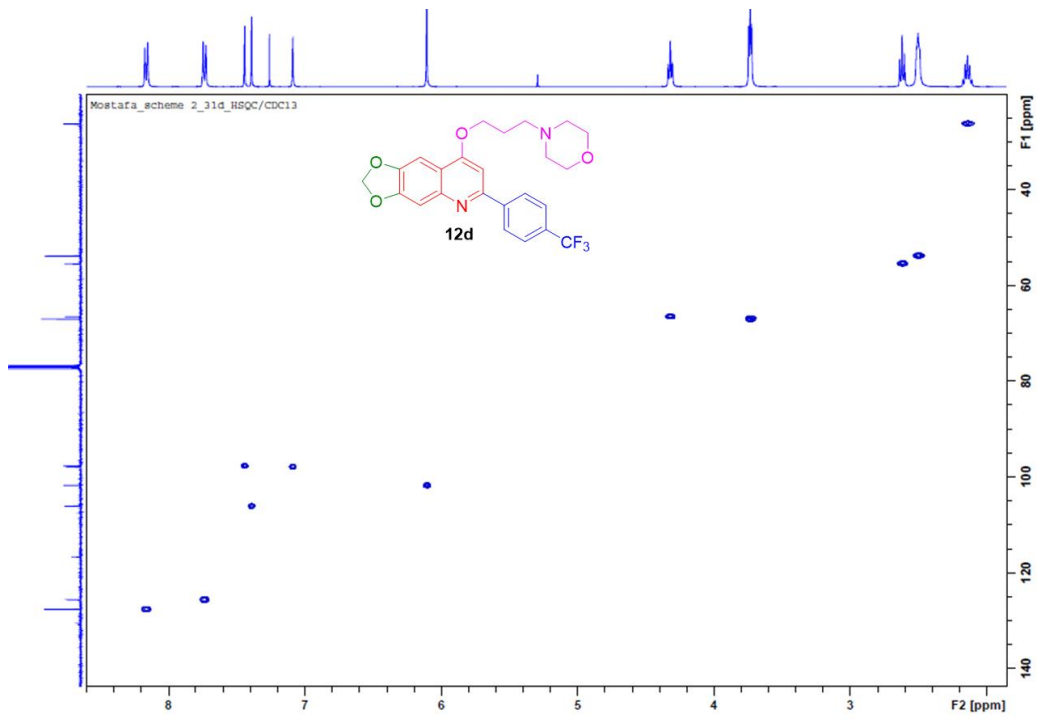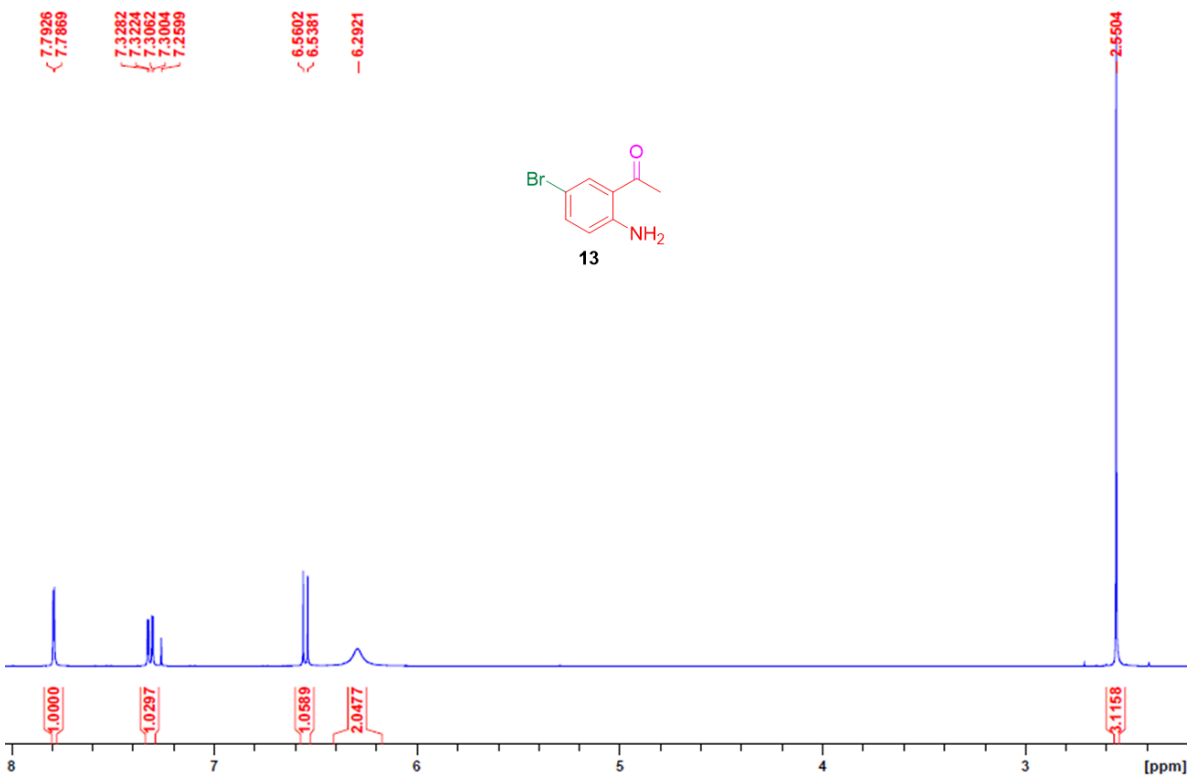

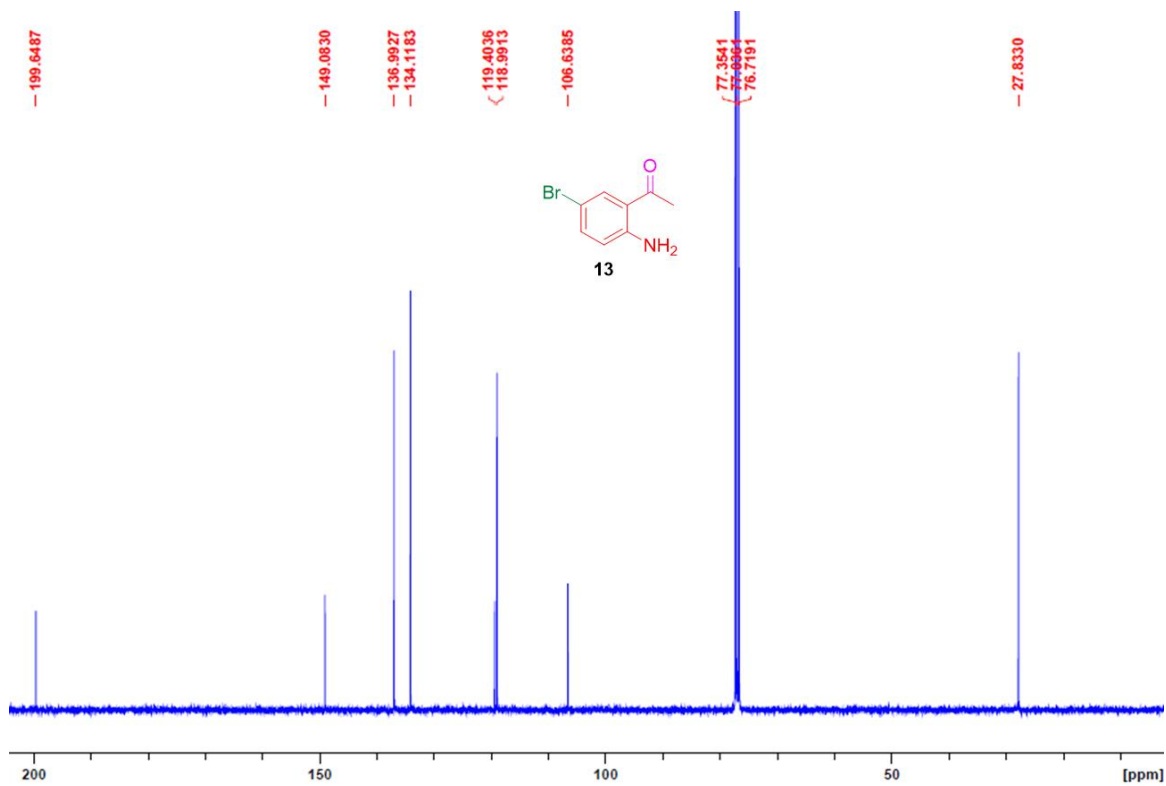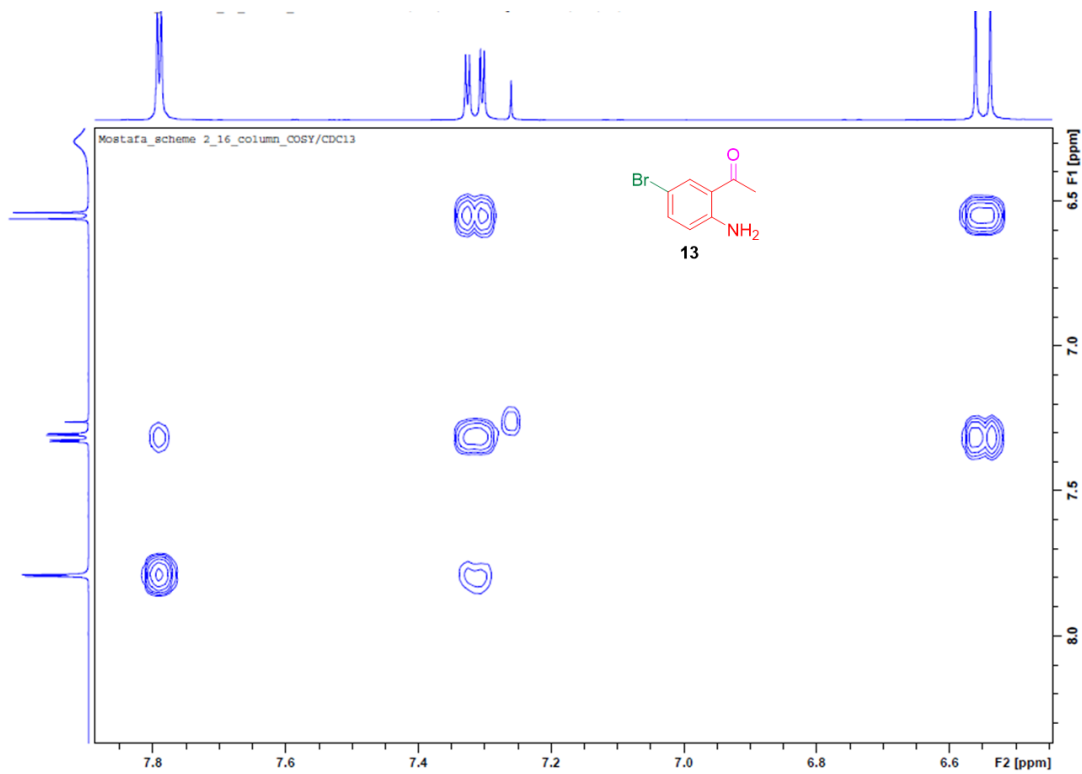

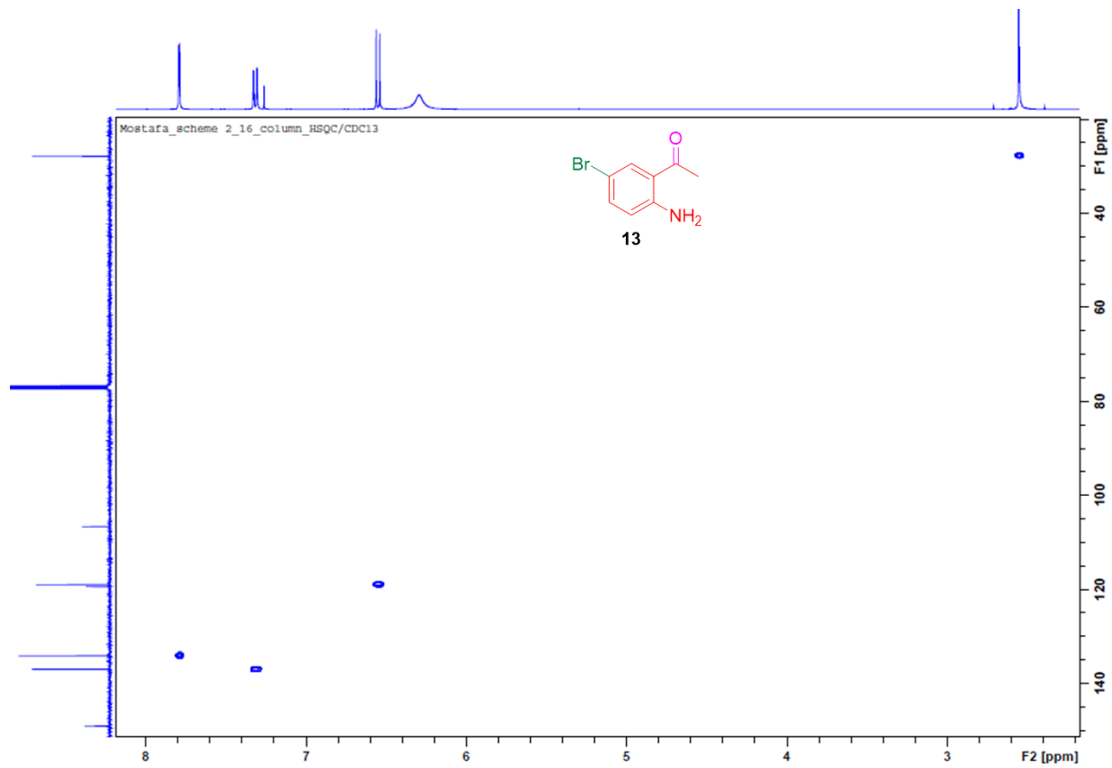

-11.9137

8.1790  
8.1749  
7.8862  
7.8648  
7.8596  
7.8583  
7.8374  
7.8332  
7.7375  
7.7152  
7.6835  
7.6624

-6.4145

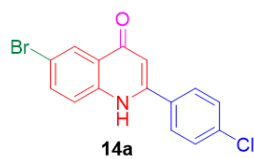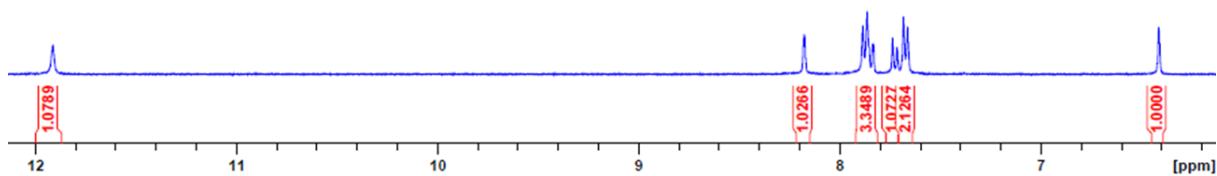

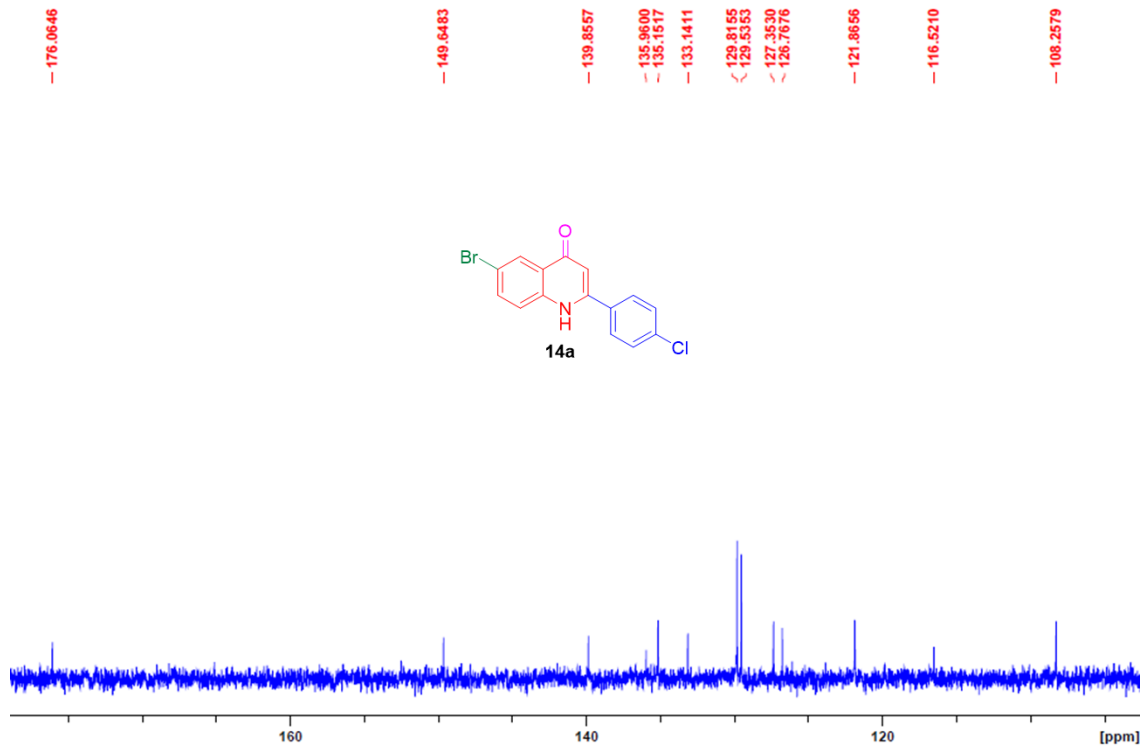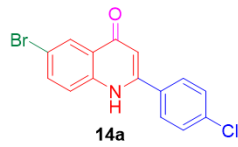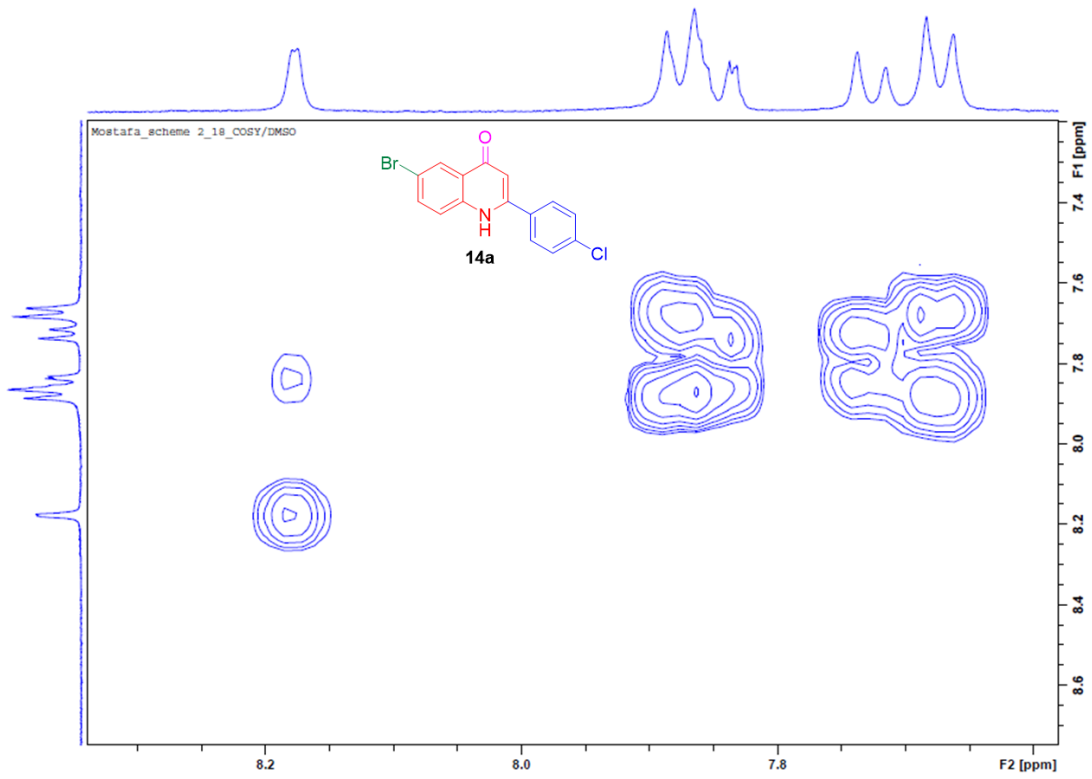

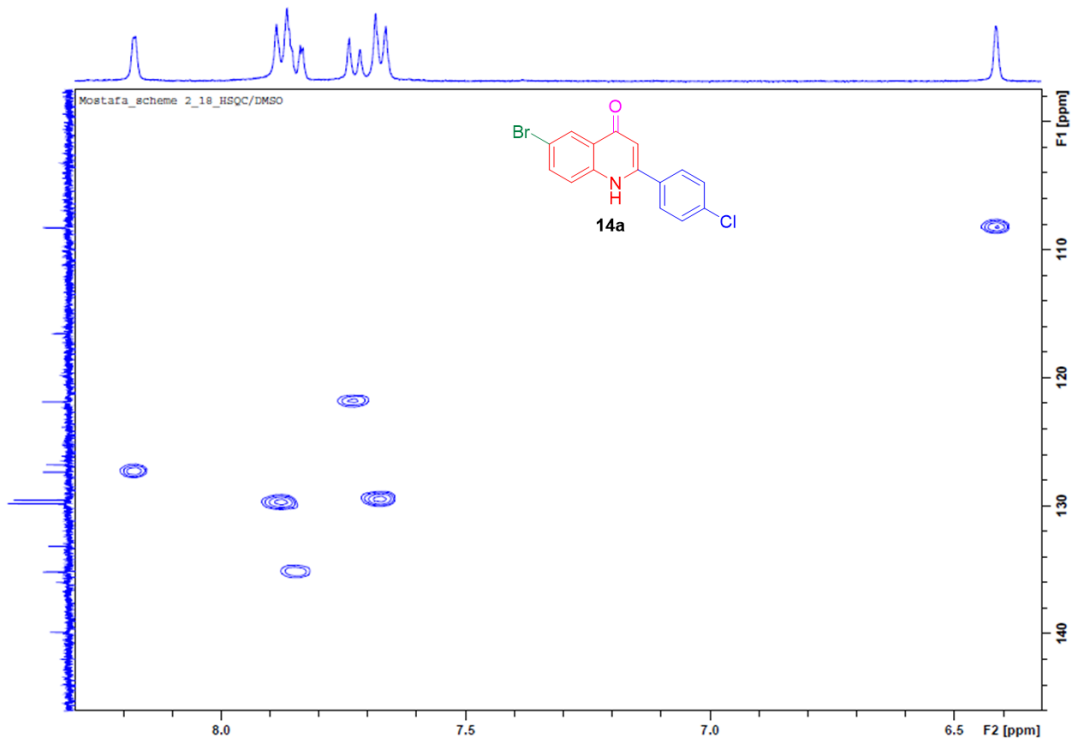

— 11.8876

8.1831  
8.1778  
7.9306  
7.9169  
7.9094  
7.8960  
7.8550  
7.8490  
7.8329  
7.8073  
7.7402  
7.7180  
7.4701  
7.4481  
7.4261

— 6.3904

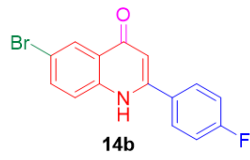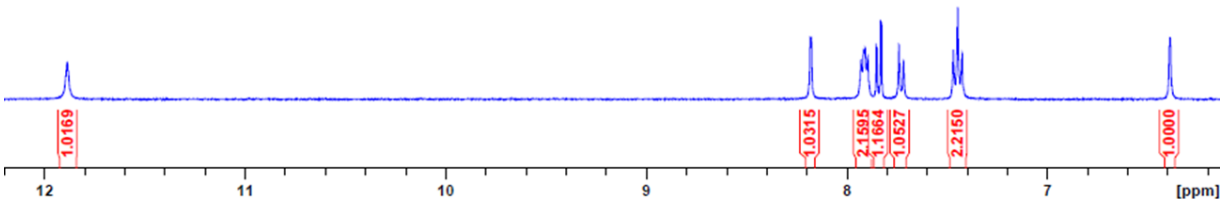

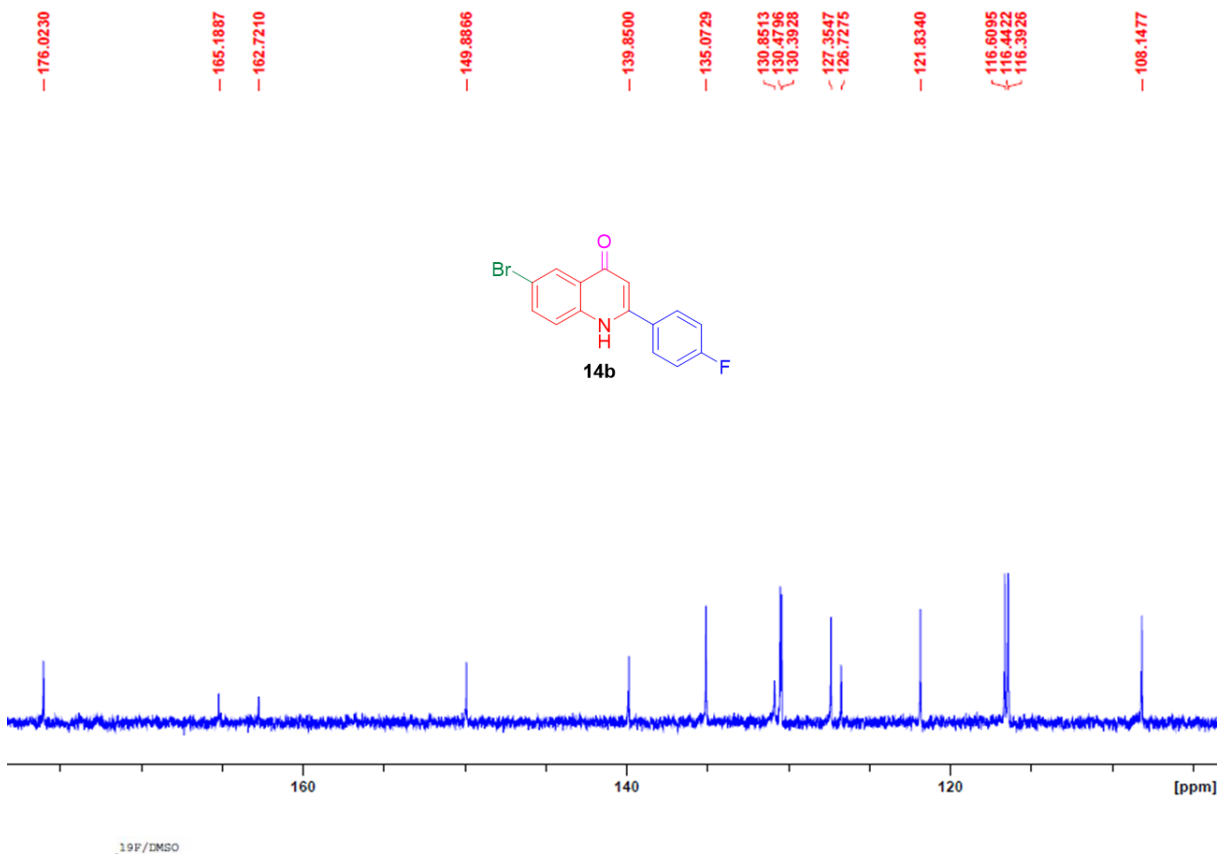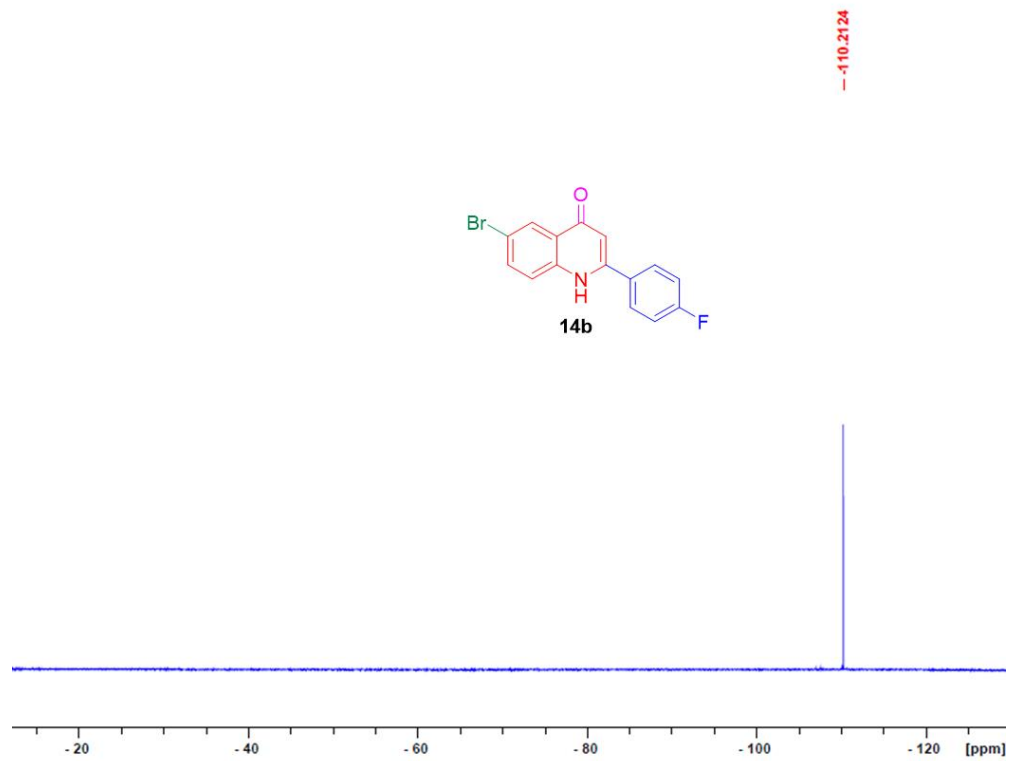



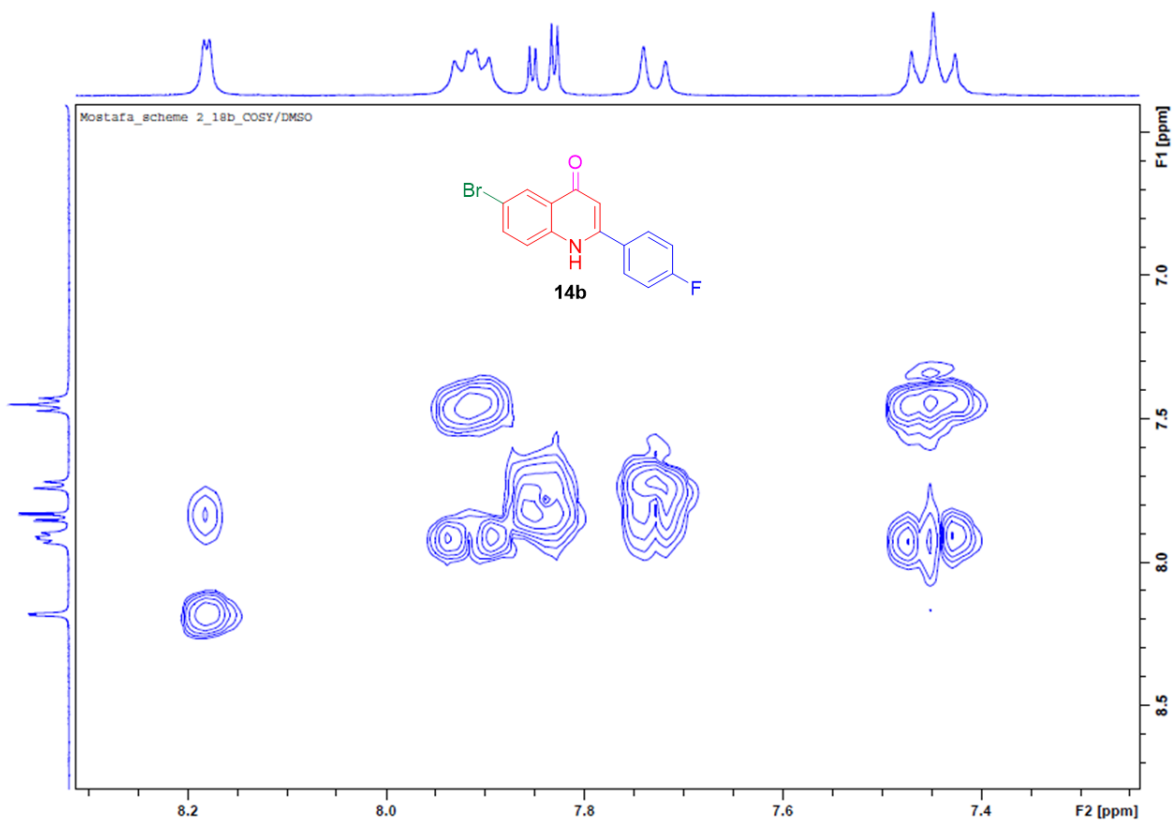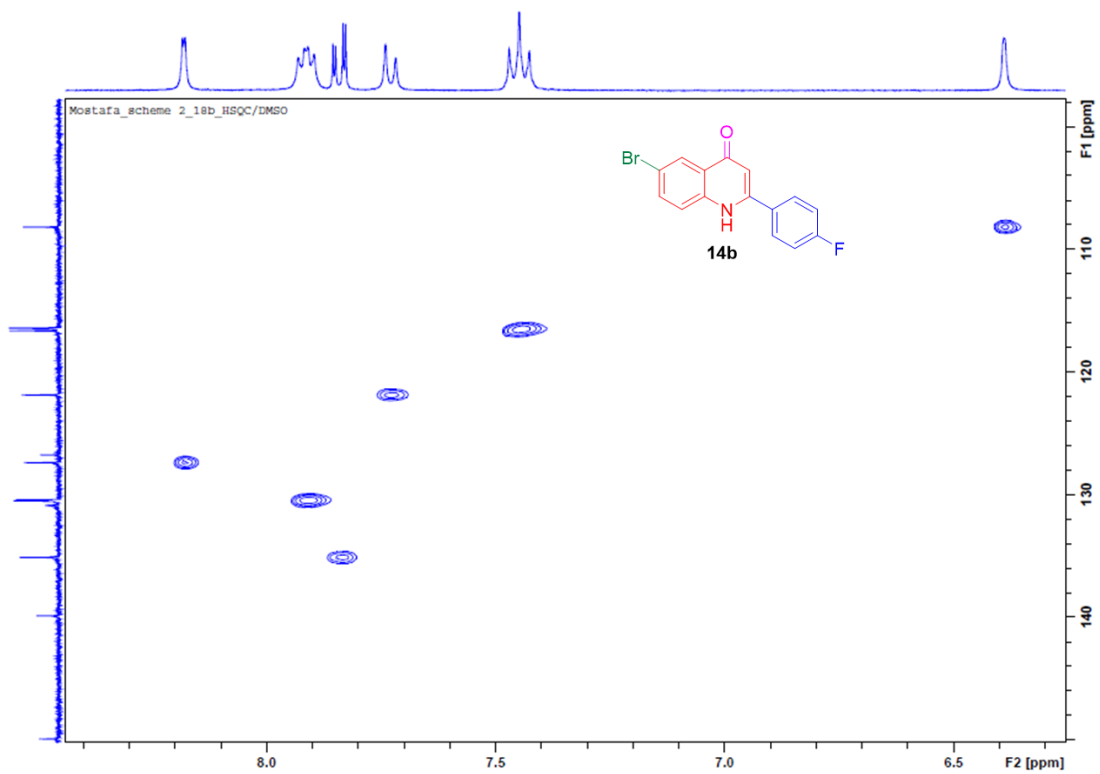

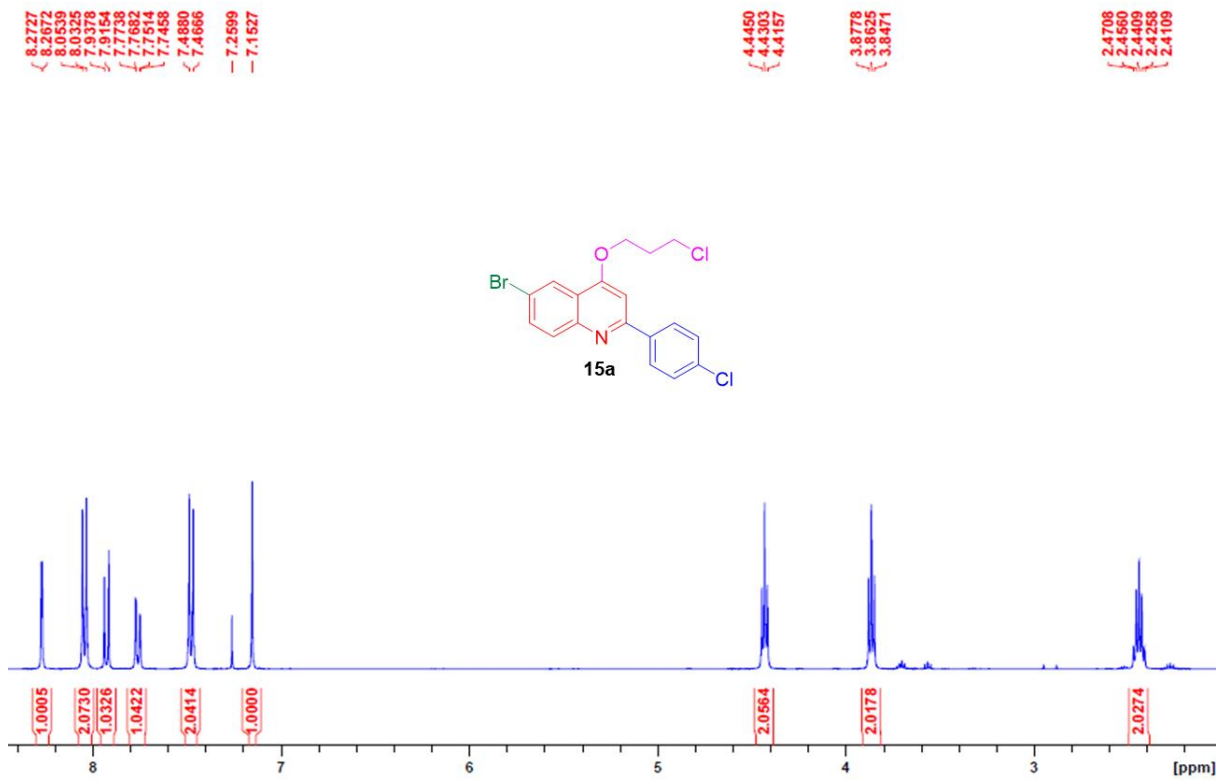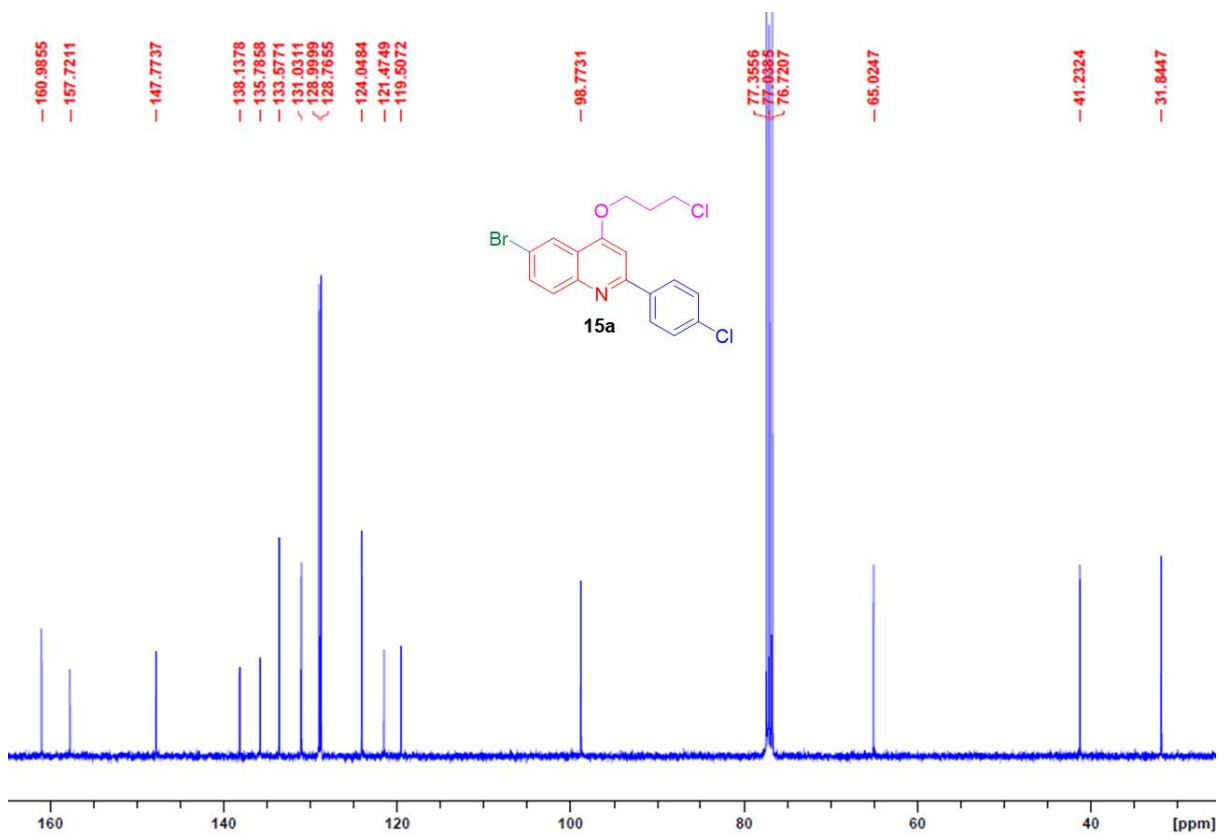

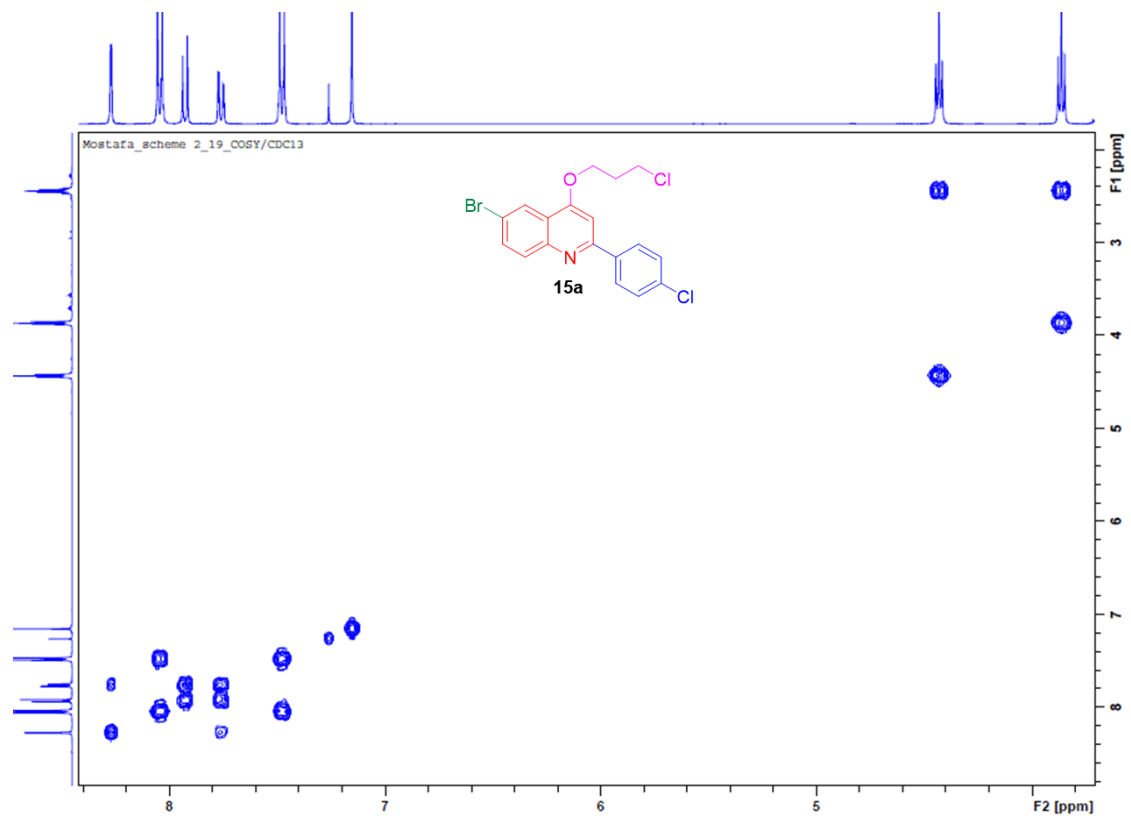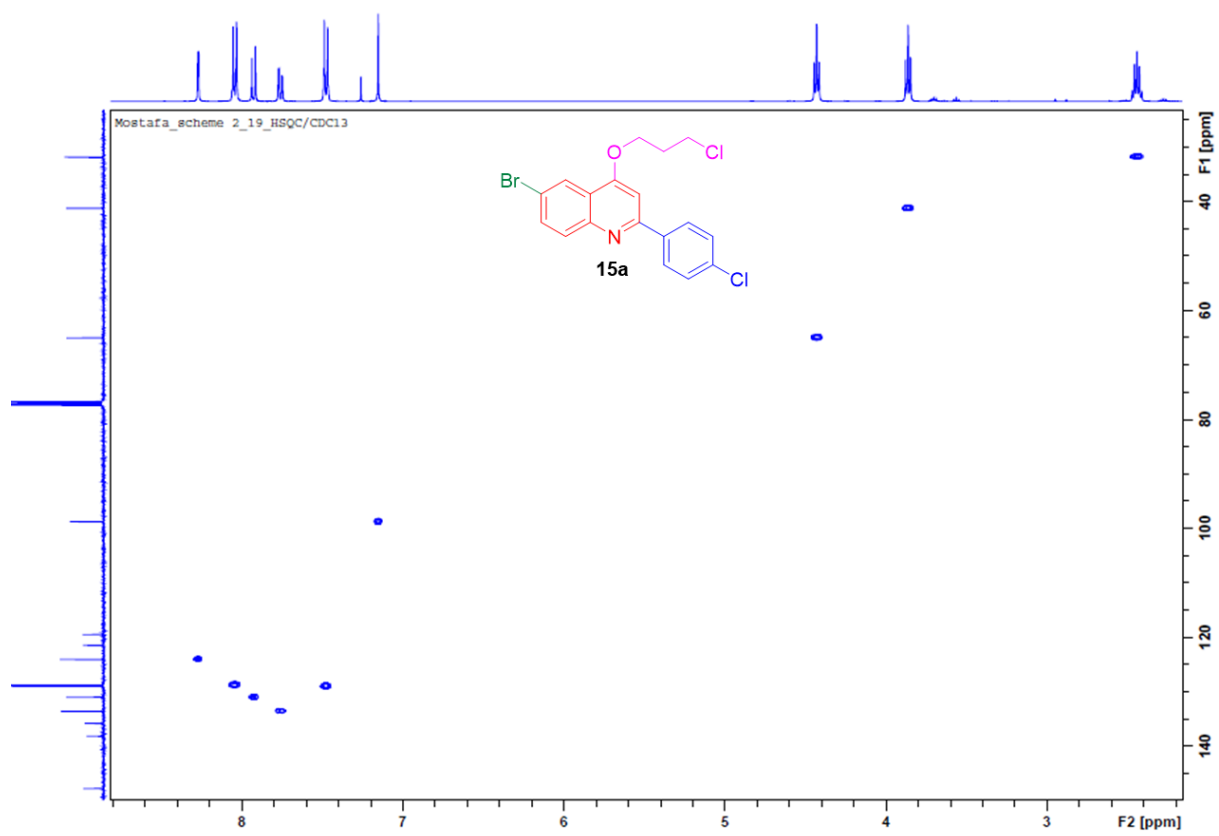

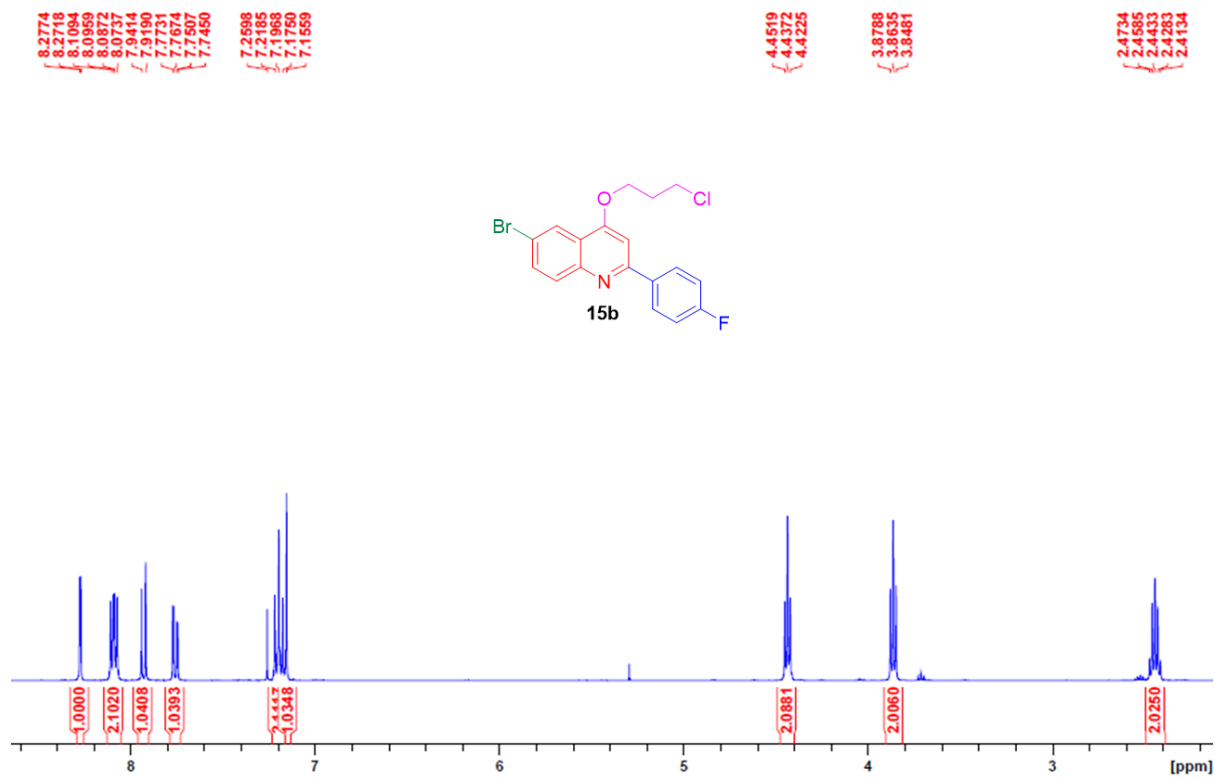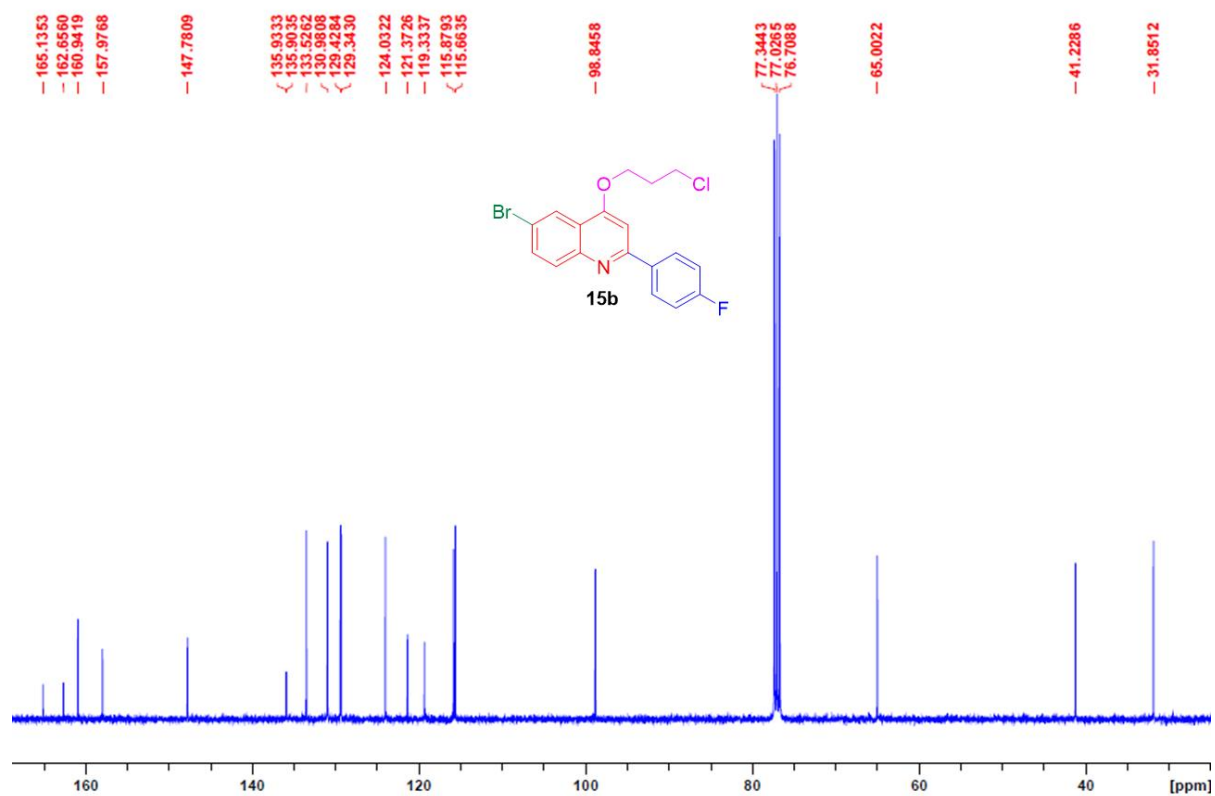

\_19f/cdc13

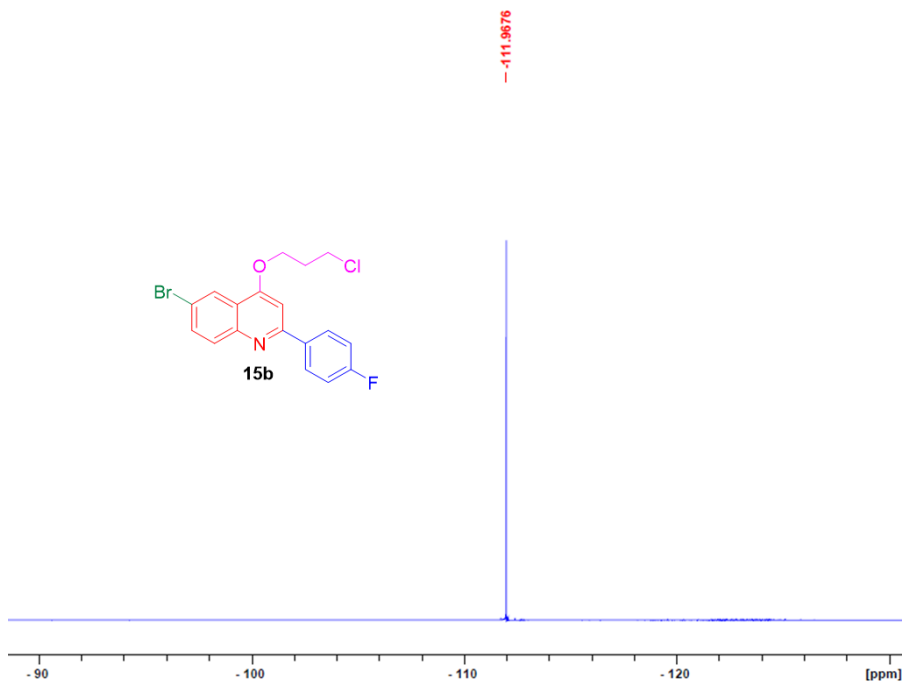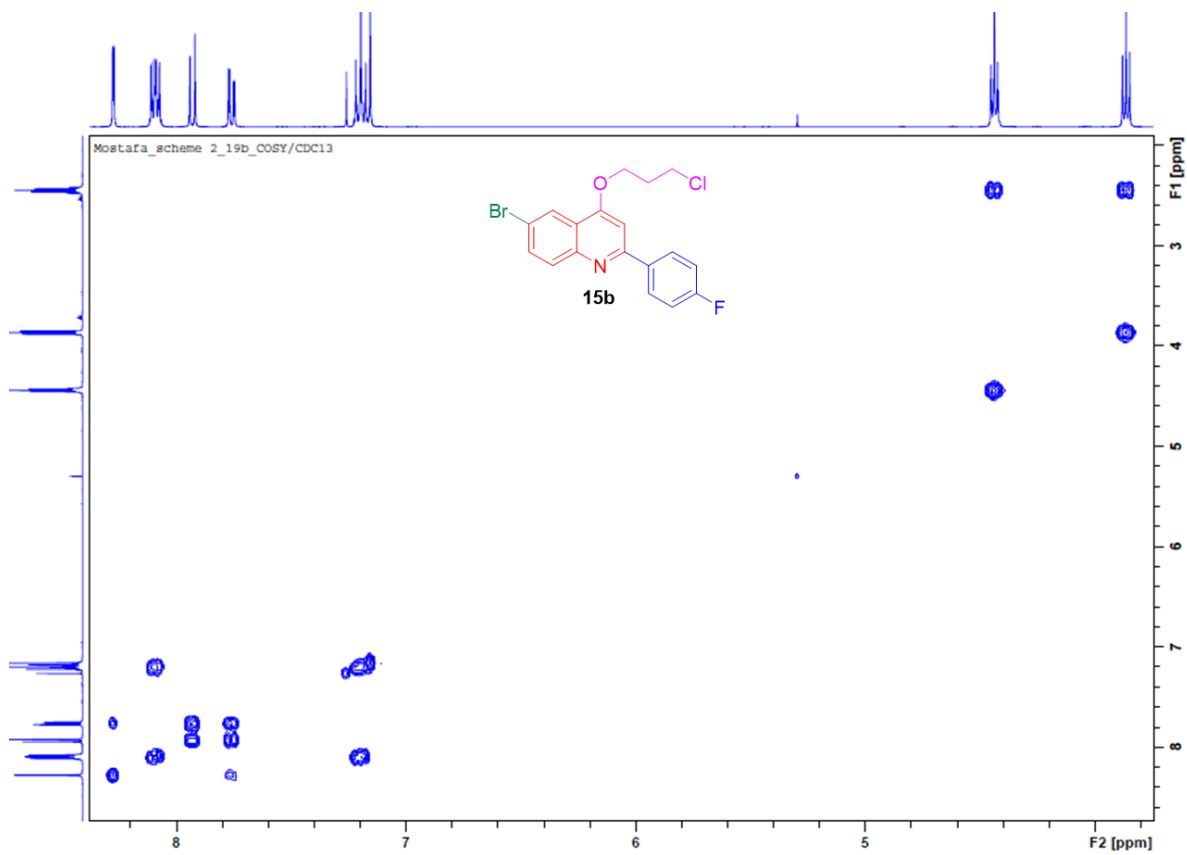

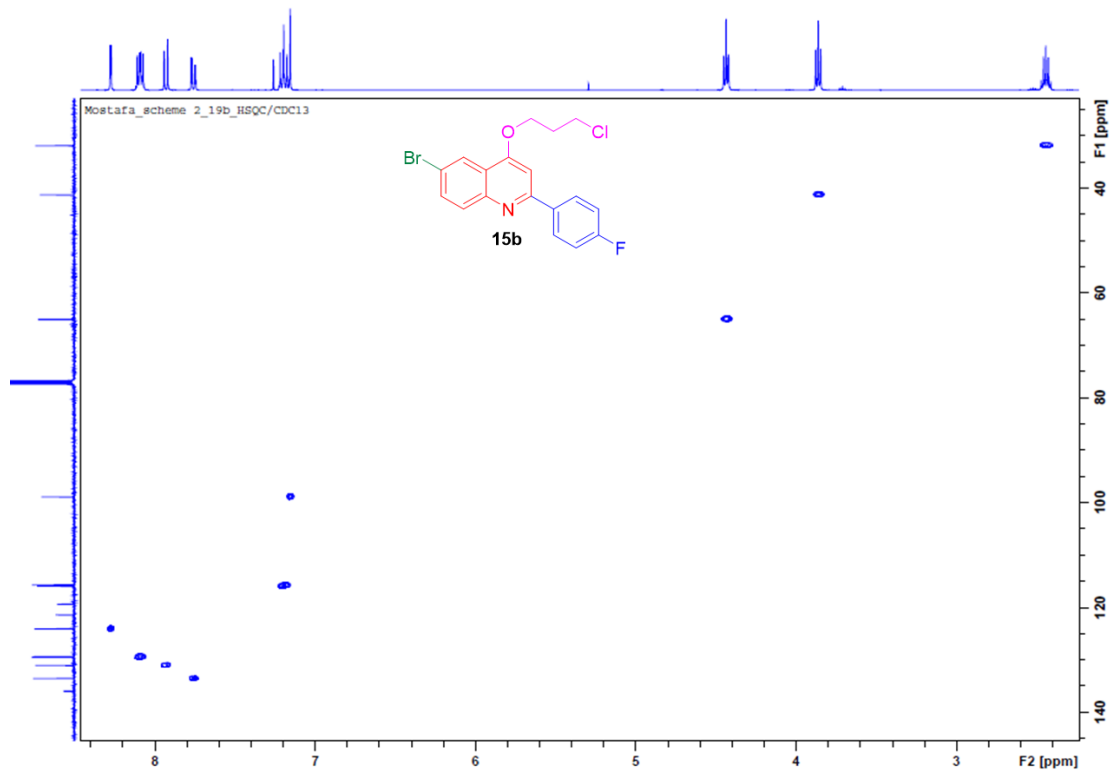

8.2773  
8.2718  
8.0142  
7.9925  
7.9580  
7.9356  
7.8966  
7.8740  
7.7742  
7.7682  
7.5048  
7.4741  
7.4524  
7.2598  
7.0962  
7.0430  
6.9506

4.3295  
4.3130  
4.2865  
4.2086  
4.1943  
4.1799

2.4722  
2.4569  
2.4415  
2.4263  
2.4107

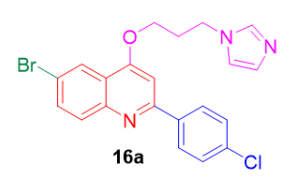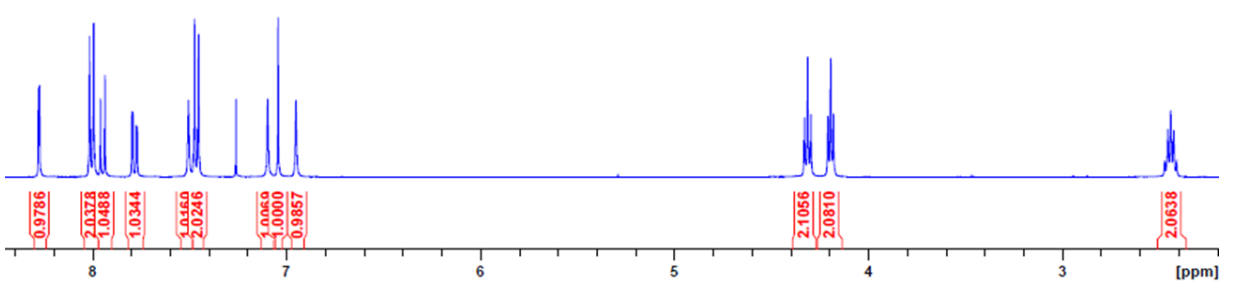

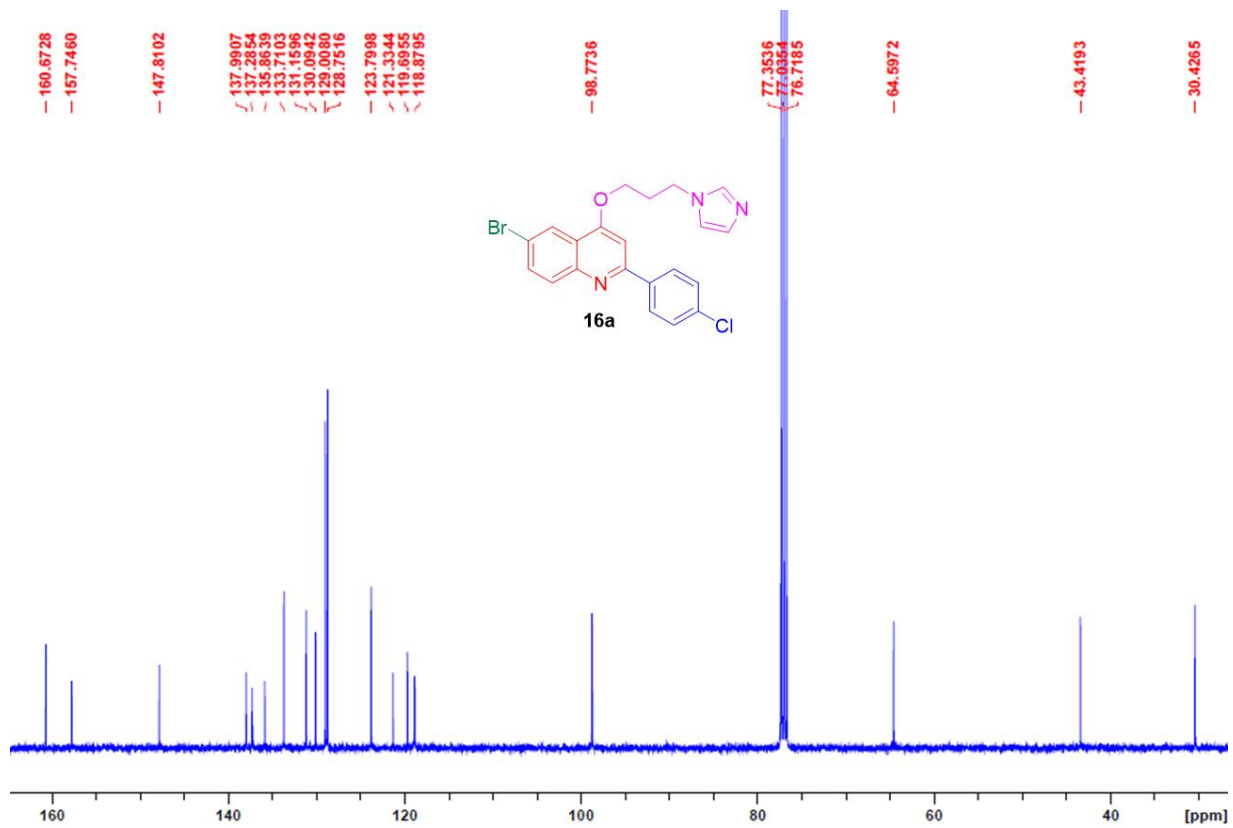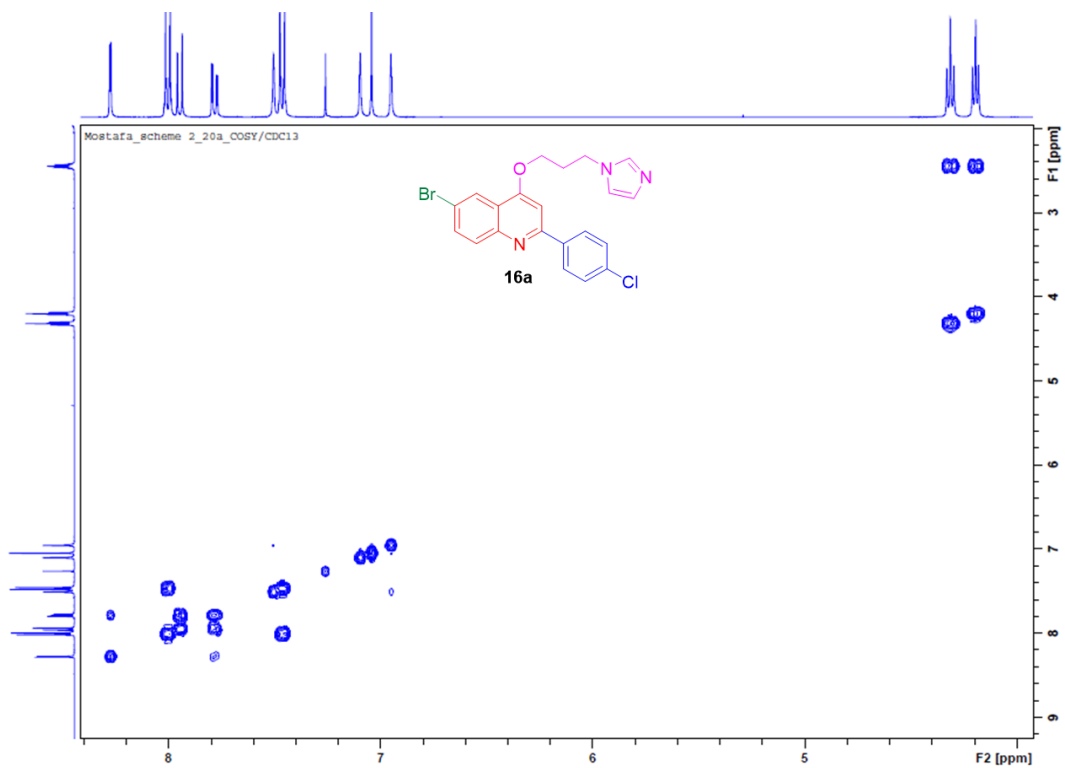

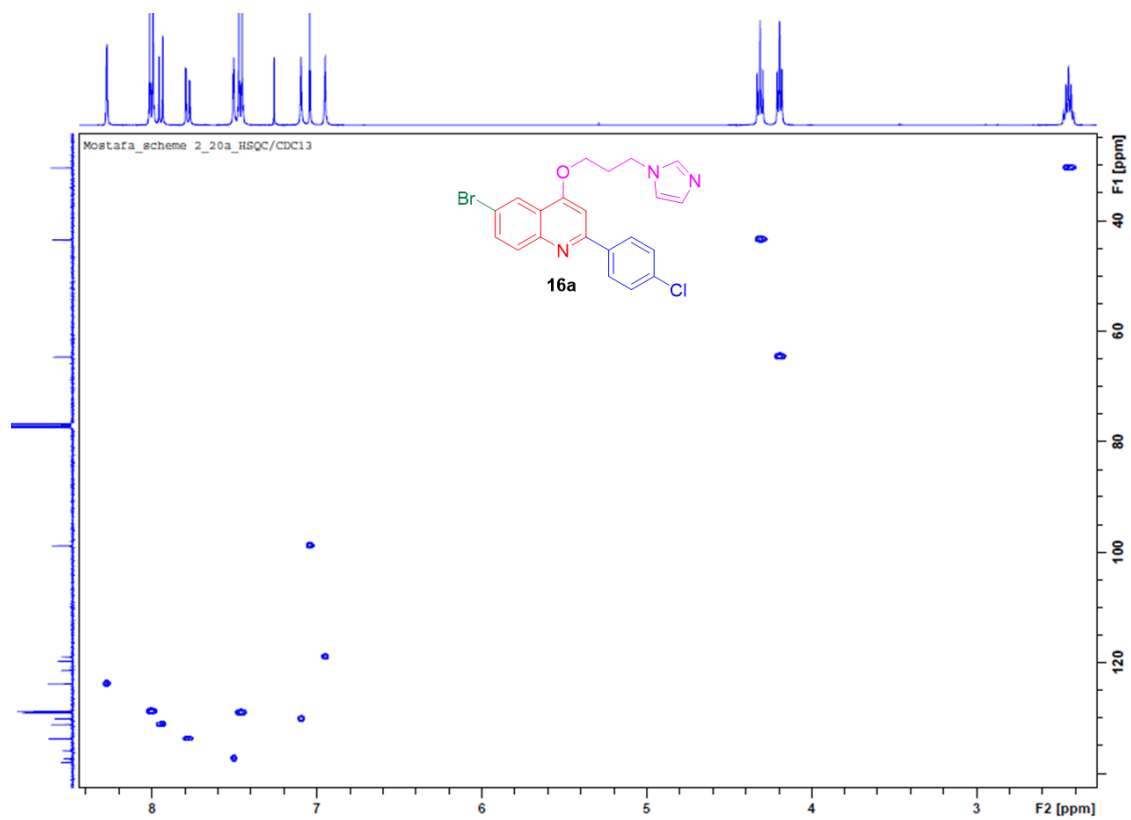

8.3038  
8.2983  
8.0475  
8.0259  
7.9313  
7.9089  
7.7913  
7.7446  
7.7389  
7.4843  
7.4627  
- 7.2598  
- 7.1314

4.3463  
4.3307  
4.3150

3.7497  
3.7382  
3.7265

2.6401  
2.6225  
2.6047  
2.5203  
2.5097  
2.4994  
2.1930  
2.1769  
2.1596  
2.1429  
2.1264

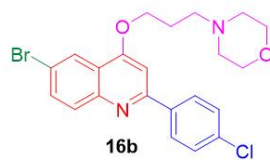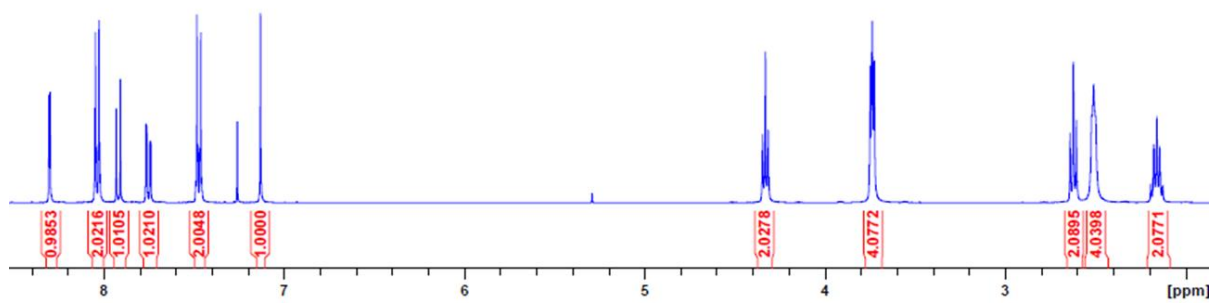



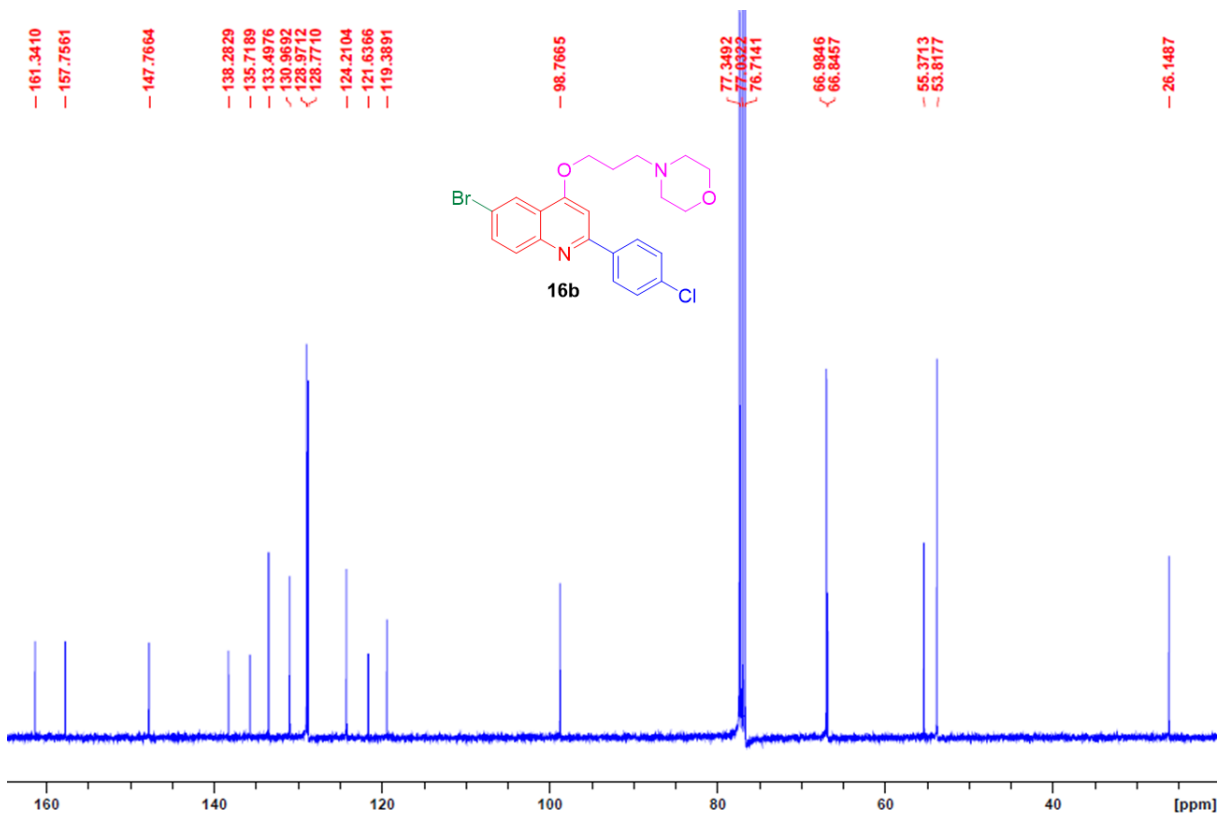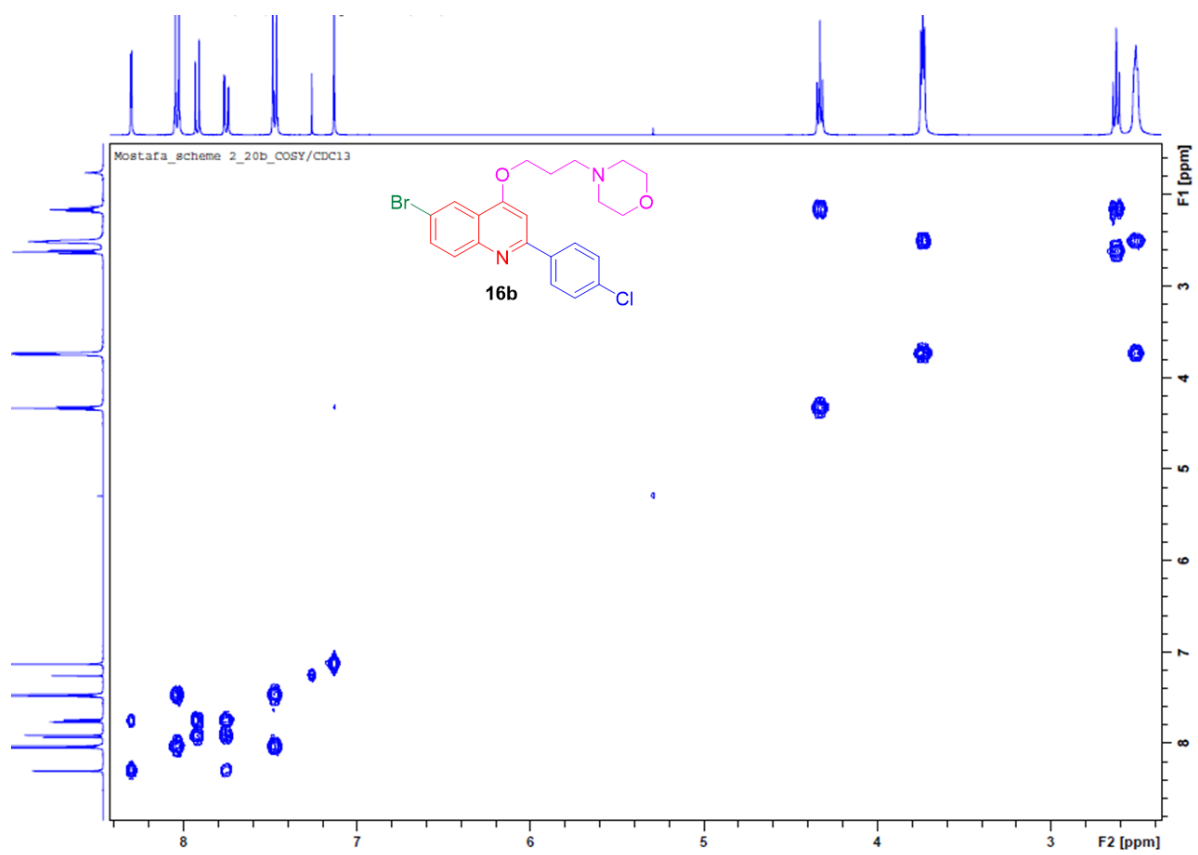

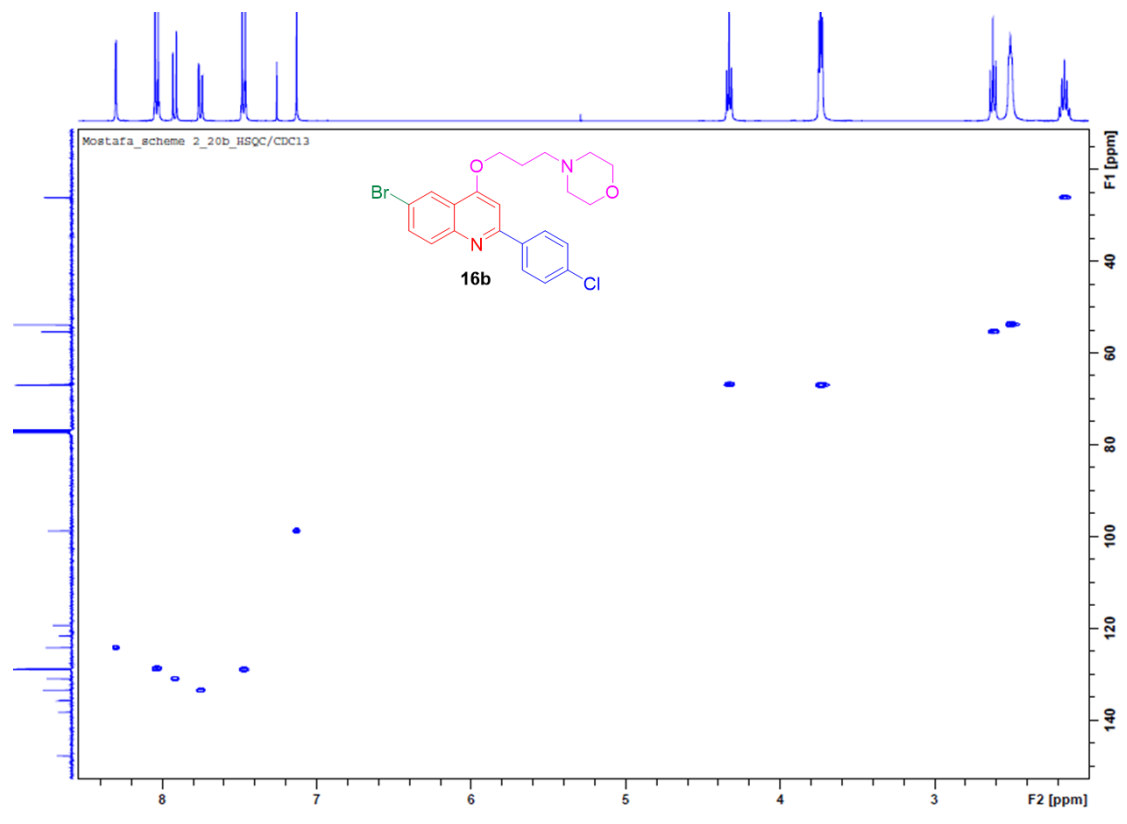

8.2750  
8.2694  
8.0638  
8.0504  
8.0418  
8.0283  
7.9552  
7.9328  
7.7909  
7.7852  
7.7685  
7.7628  
7.5027  
7.2599  
7.1991  
7.1775  
7.1558  
7.0934  
7.0350  
6.9487

4.3280  
4.3115  
4.2950  
4.1906  
4.1766

2.4682  
2.4539  
2.4374  
2.4077

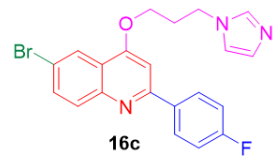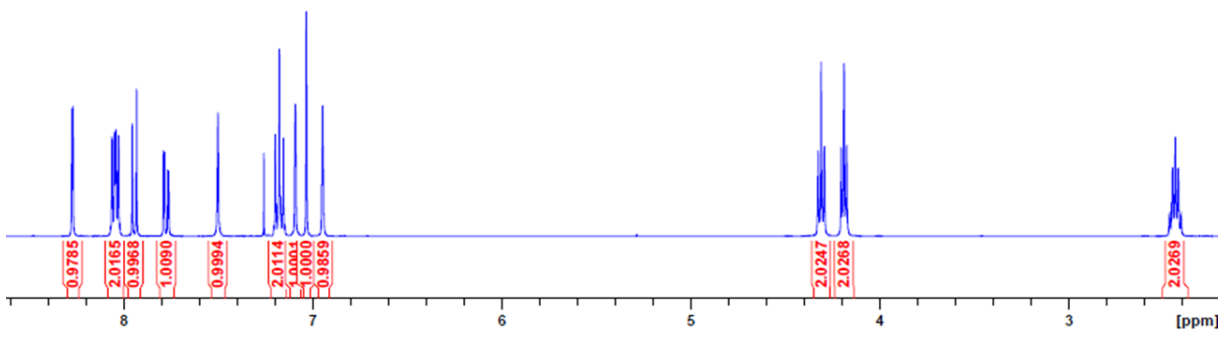

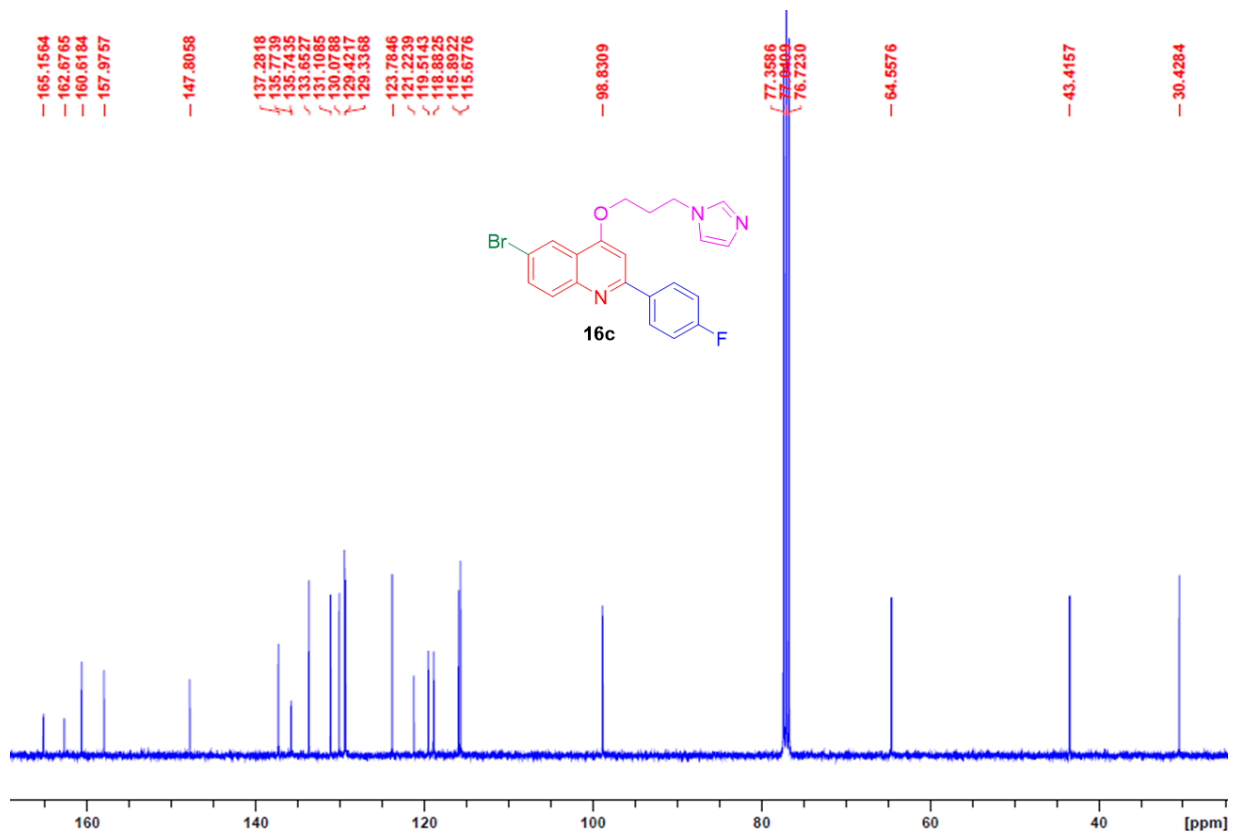

\_19F/CDCl3

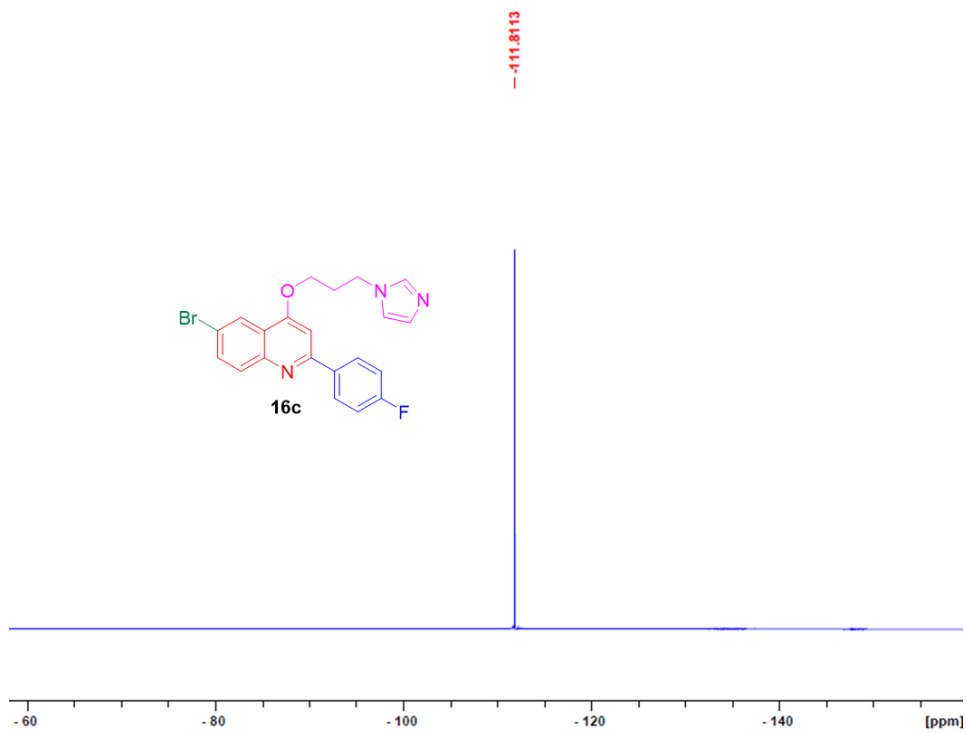

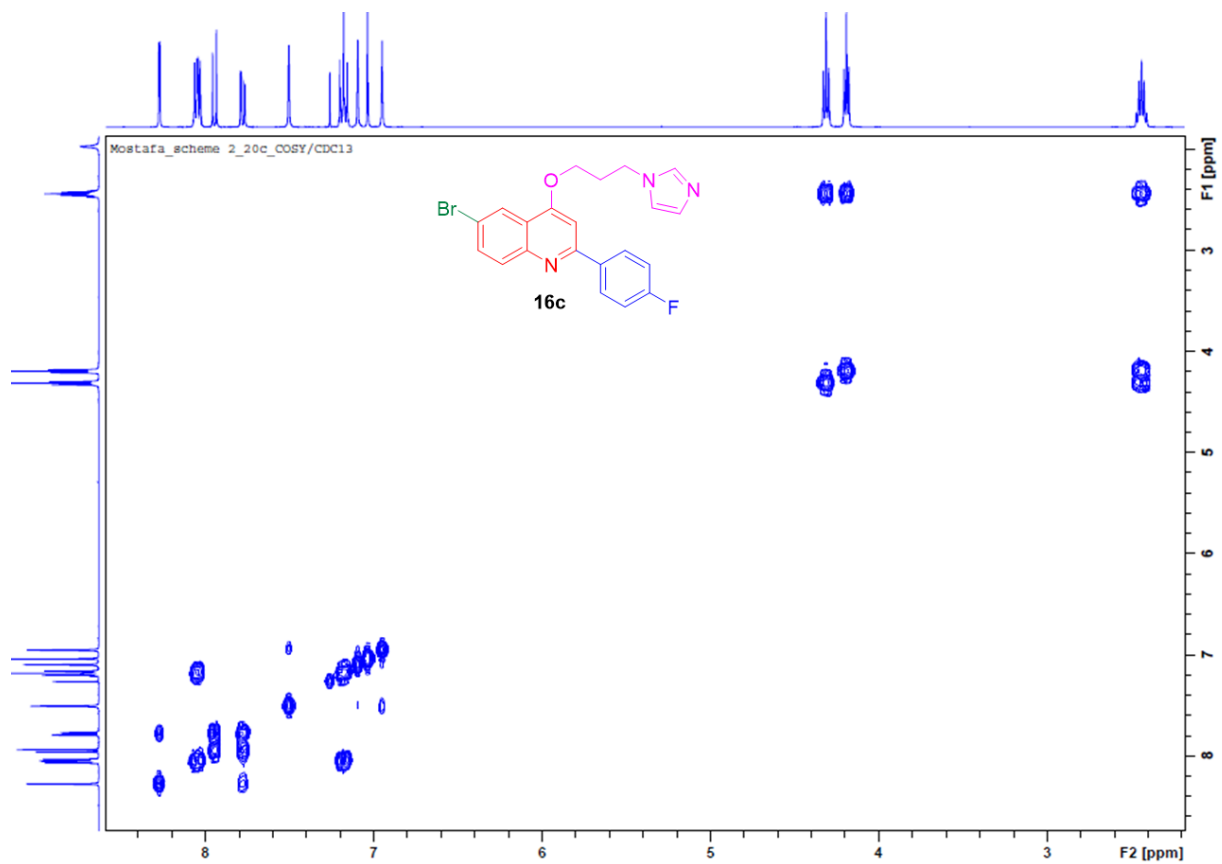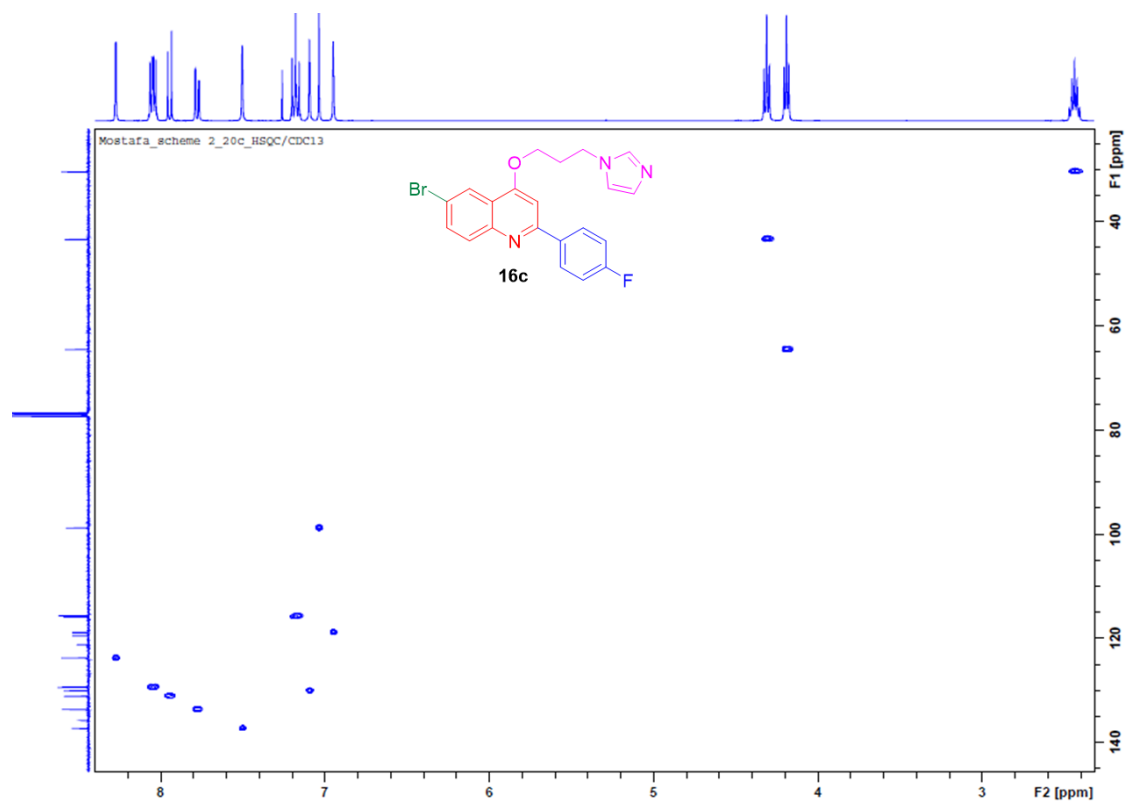

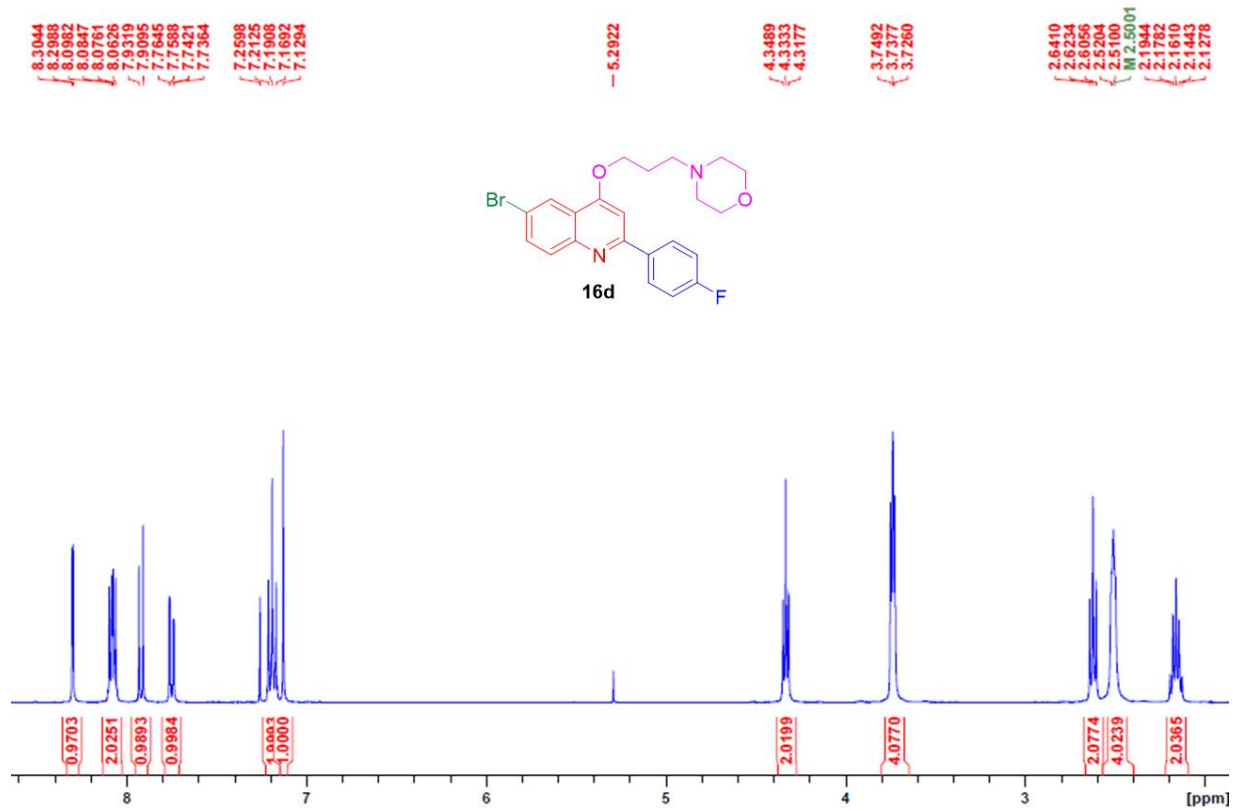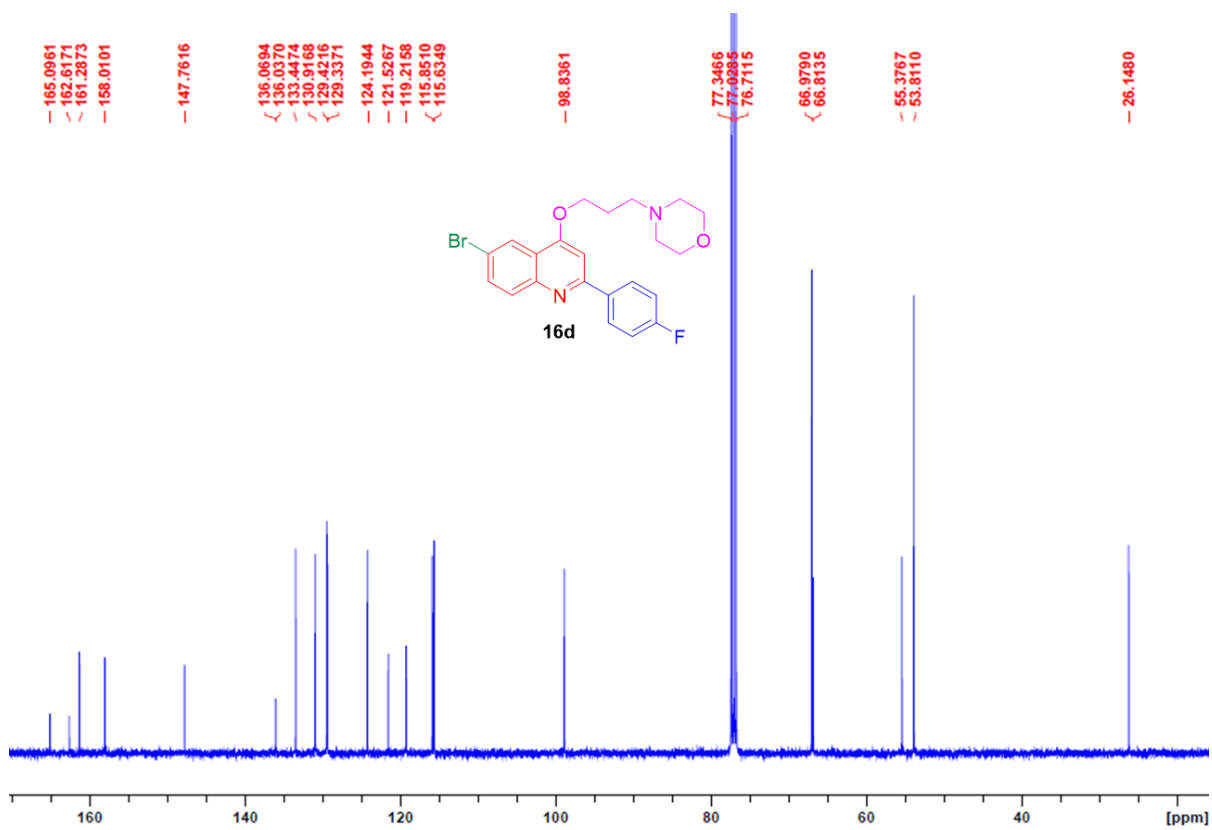

\_19F/CDC13

-112.0539

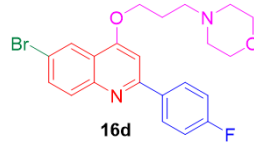

-60 -80 -100 -120 -140 -160 [ppm]

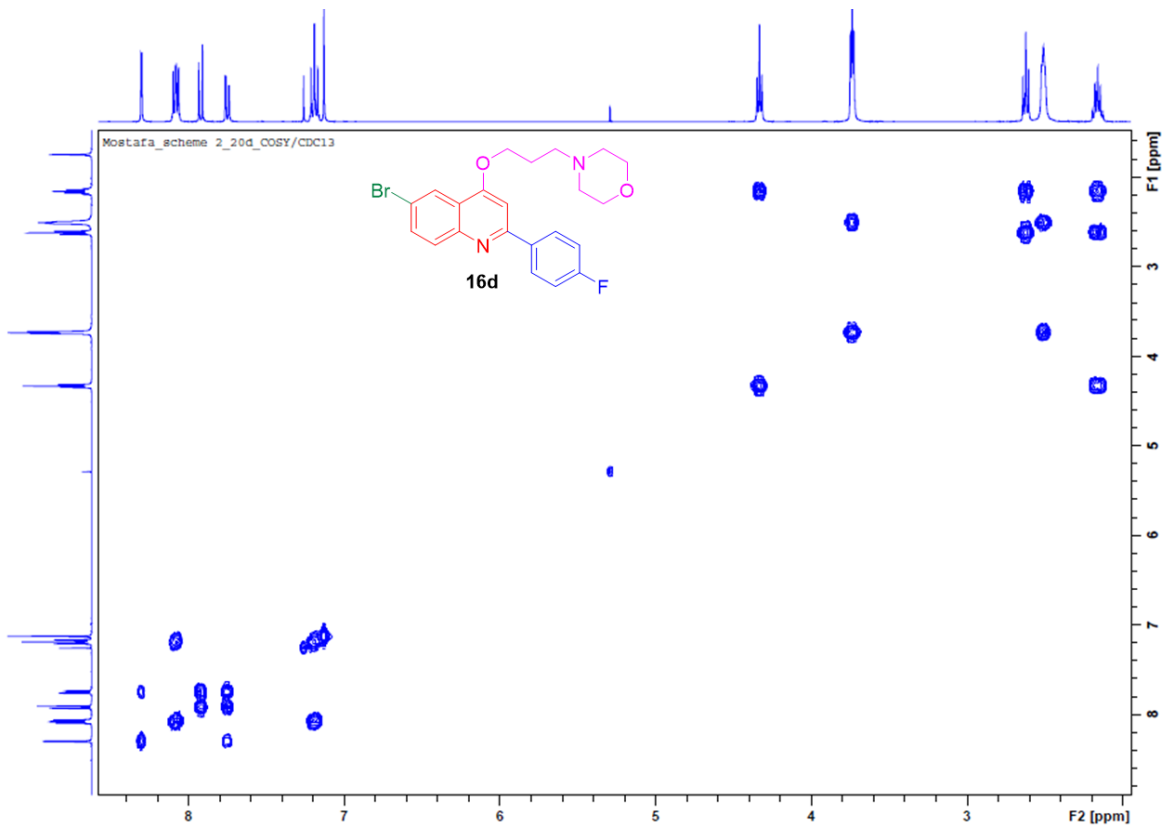

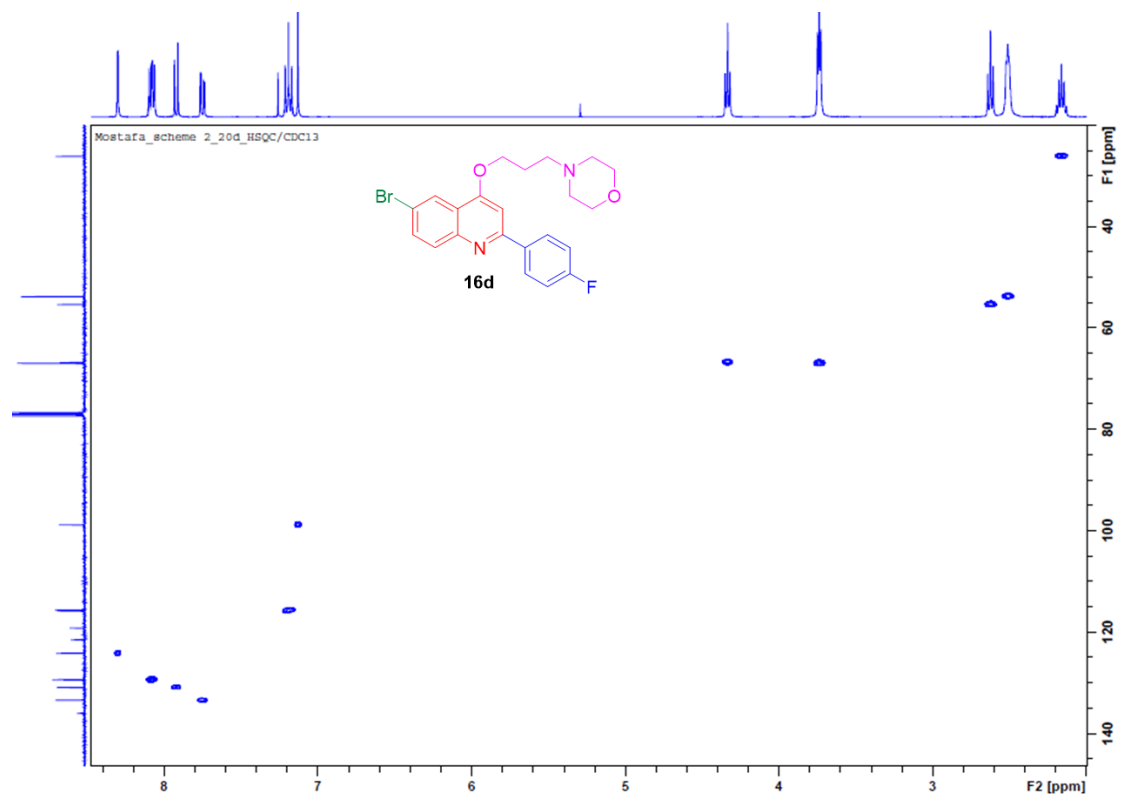

7.8670  
7.8616  
7.4995  
7.4941  
7.4781  
7.4726  
7.4637  
7.4417  
6.9829  
6.9609  
6.7270  
6.7056  
6.2910  
3.8502  
2.6362

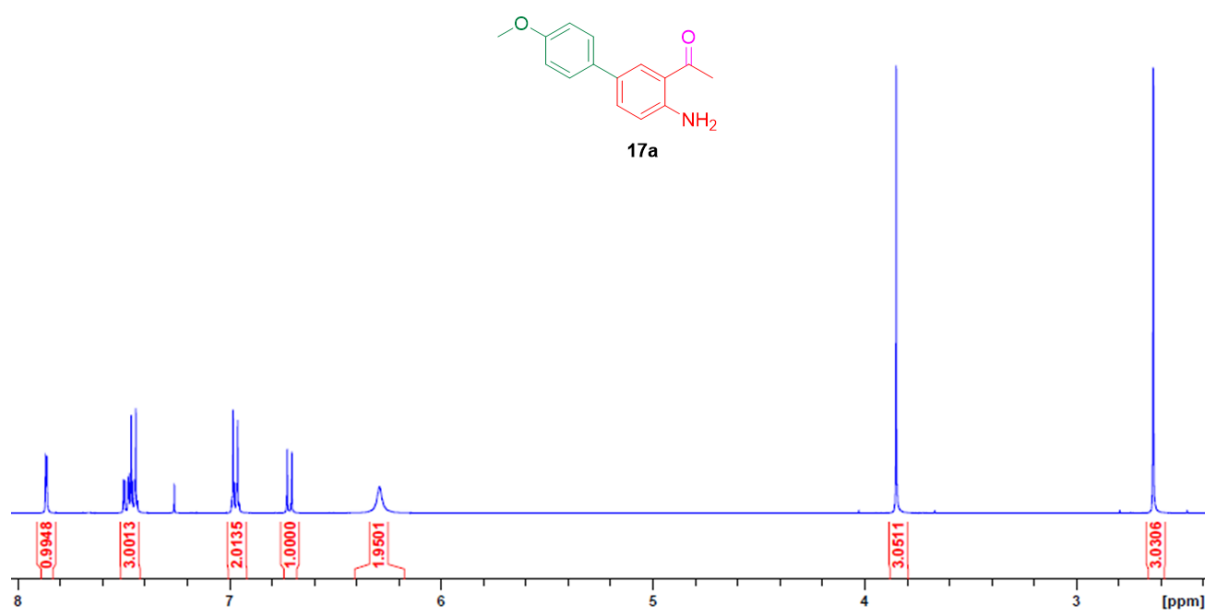

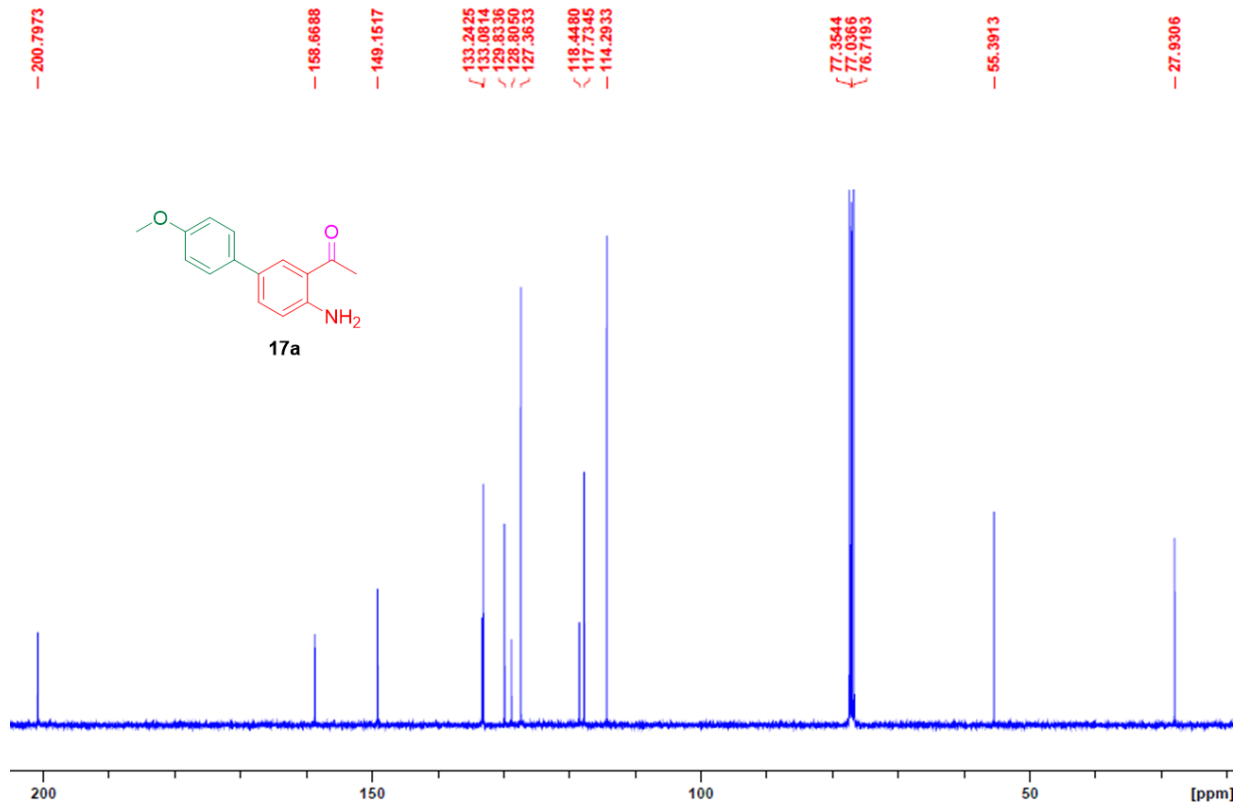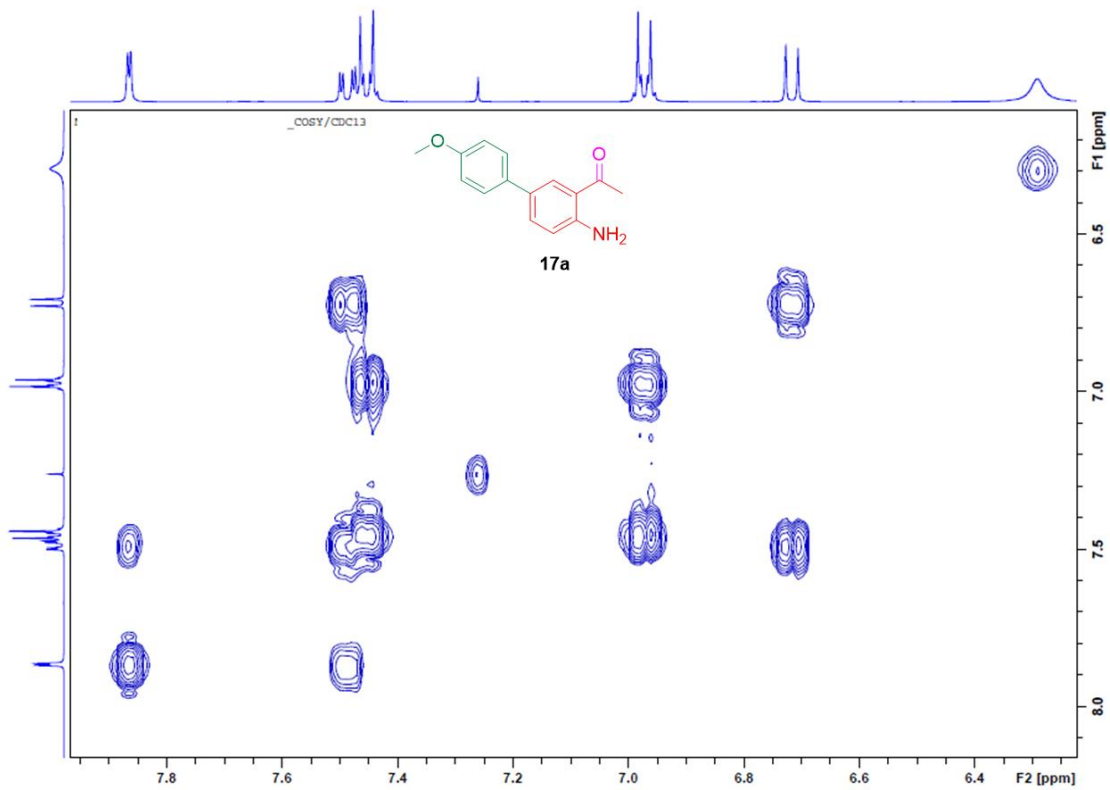



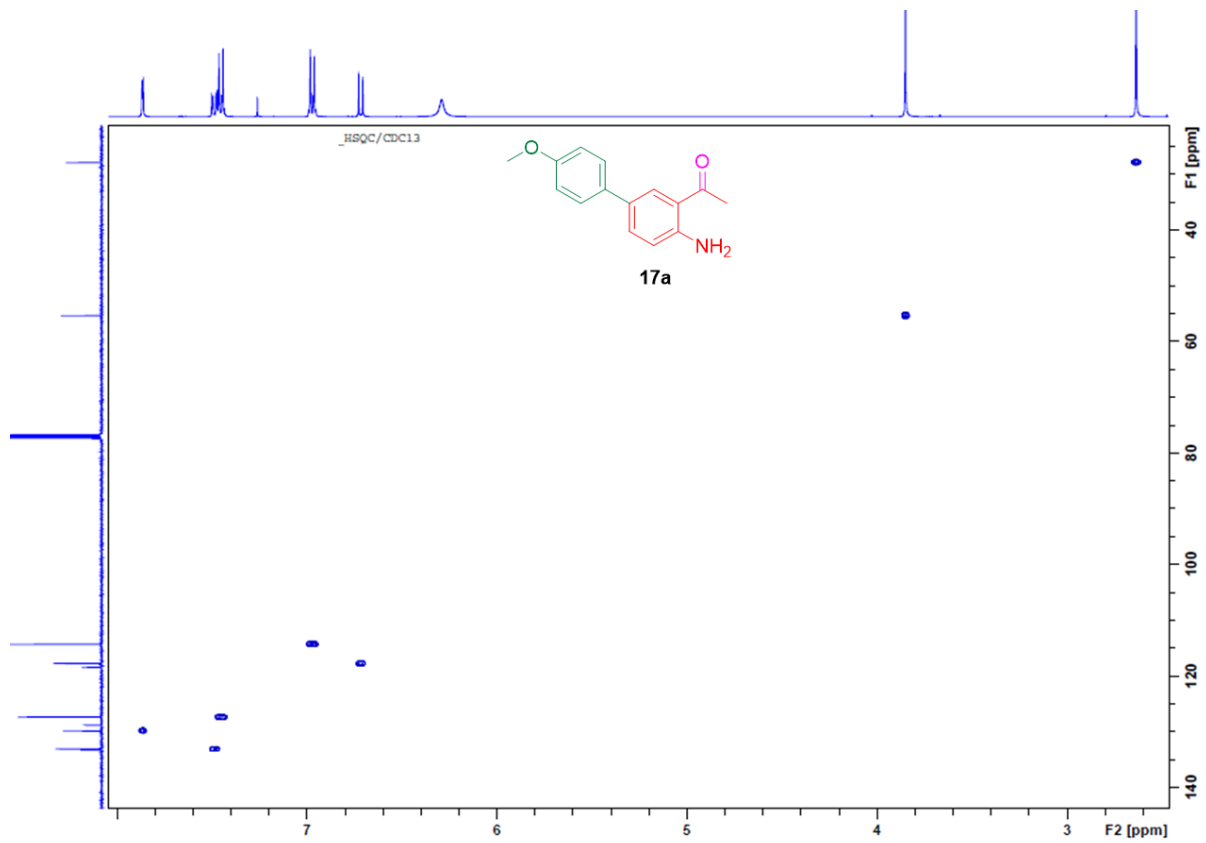

8.0298  
8.0248  
7.5688  
7.5637  
7.5473  
7.5422  
7.4217  
7.4194  
7.4176  
7.3583  
7.2599  
6.6796  
6.6580  
6.4676  
6.4654  
6.4593  
6.4564  
6.4517  
6.4476  
6.4433  
6.3697

2.6397

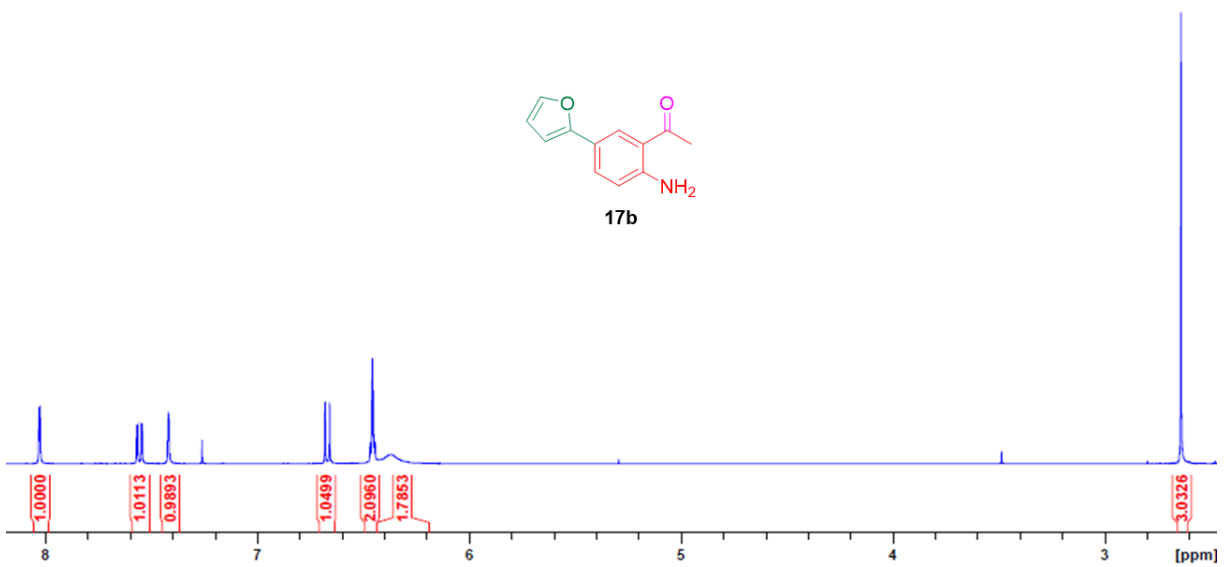

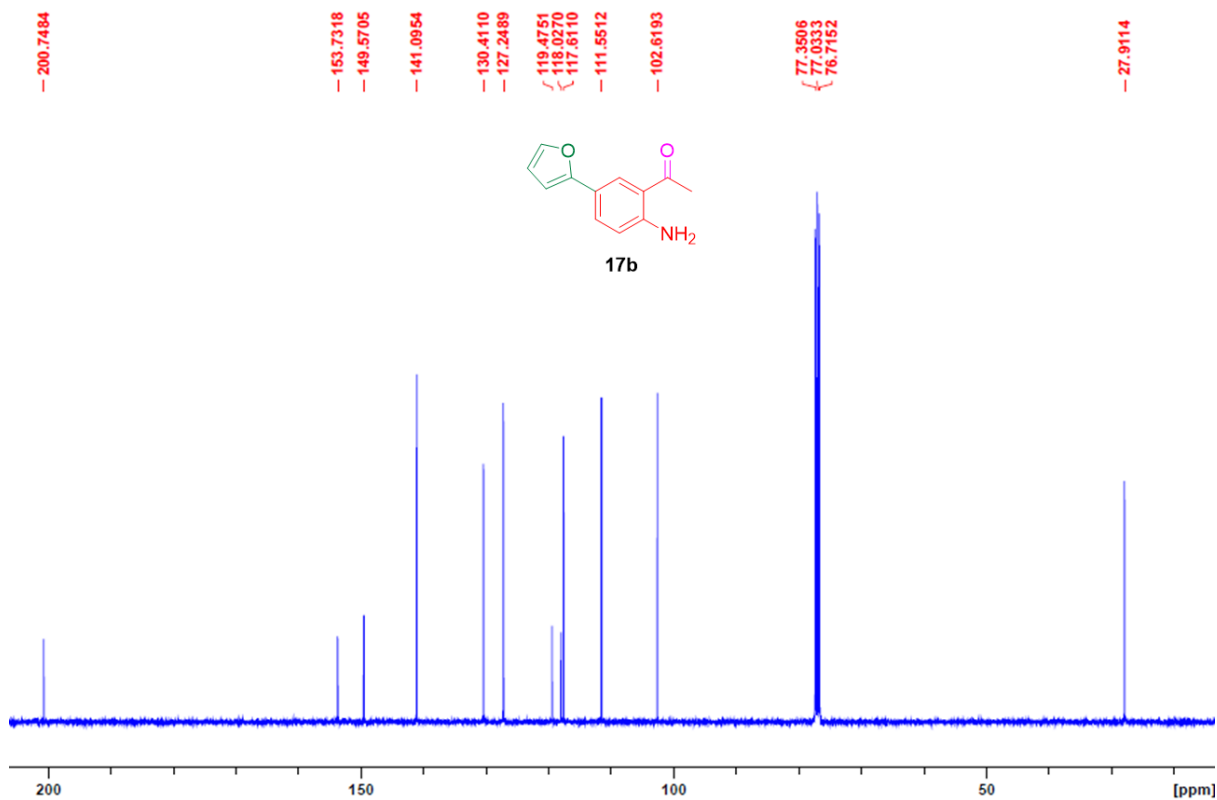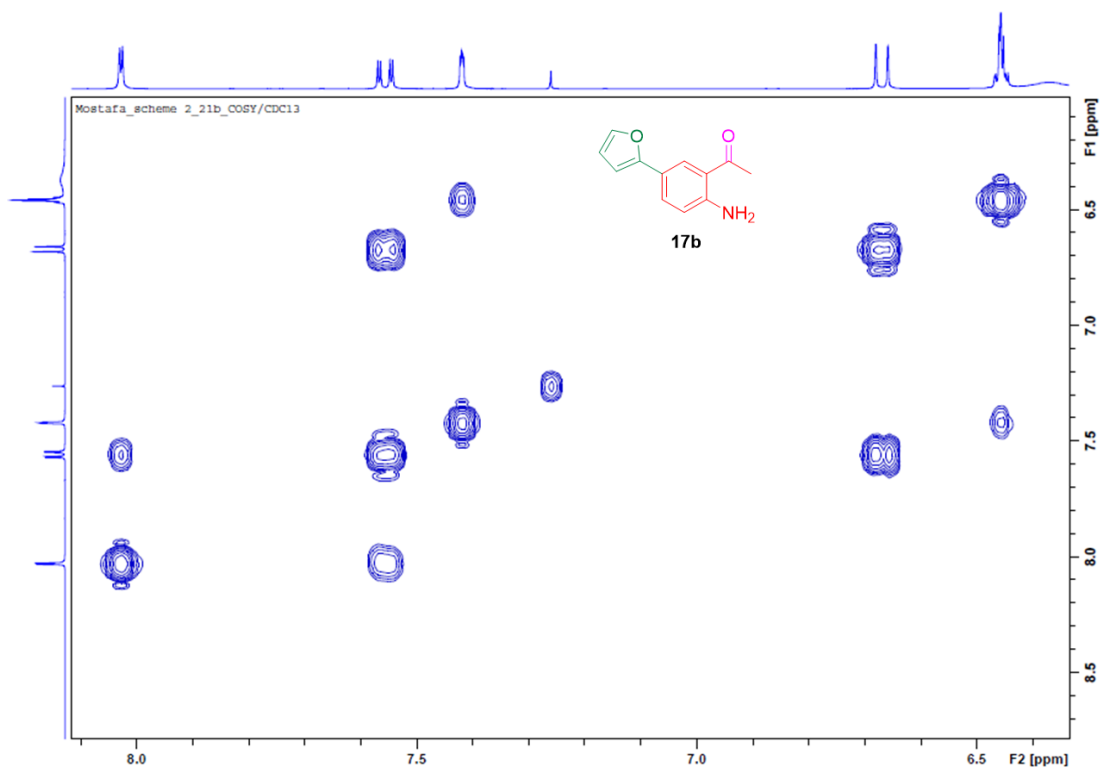

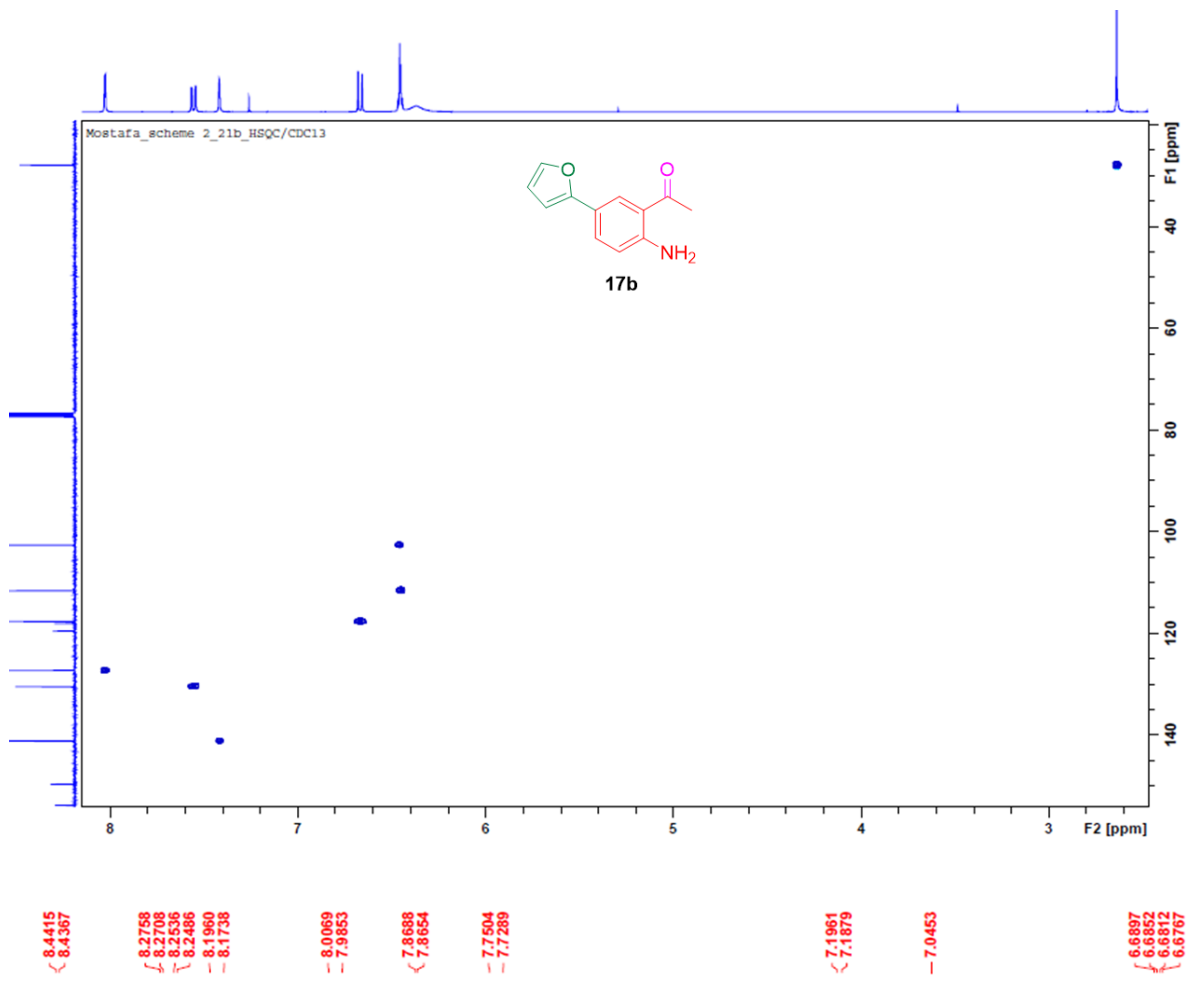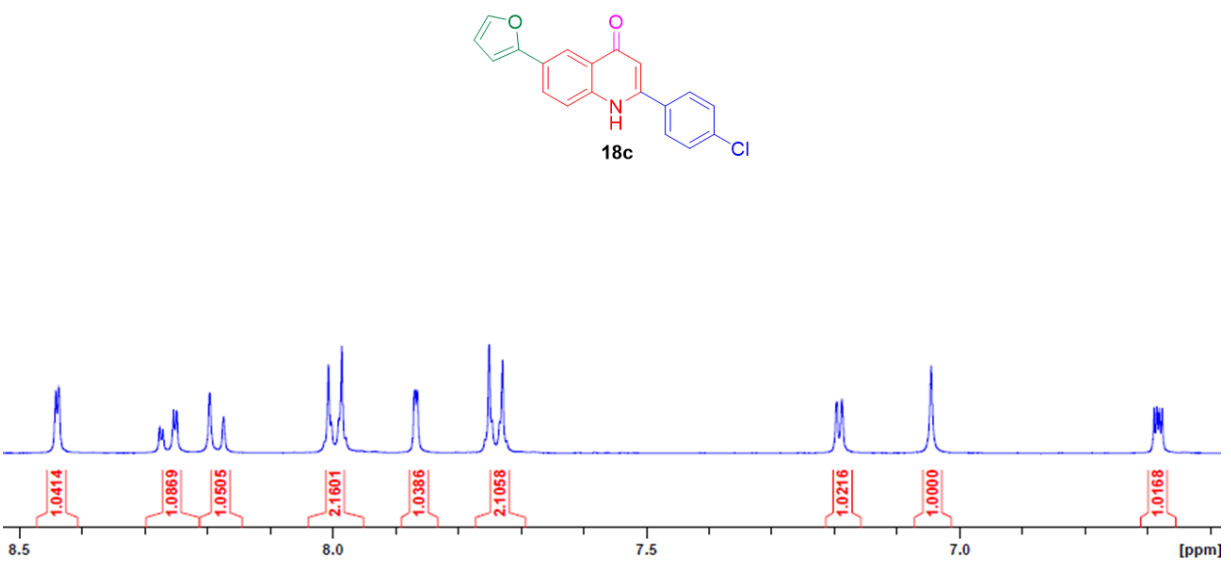

—M 172.8658

- 162.3203
- 161.6769
- 144.3920
- 140.0695
- 136.8680
- 132.1259
- 130.4961
- 129.7133
- 129.5938
- 128.1125
- 122.6781
- 121.2796
- 117.5395
- 112.9663
- 108.0914
- 106.4254

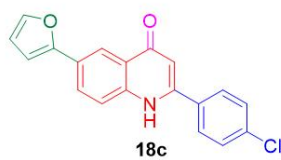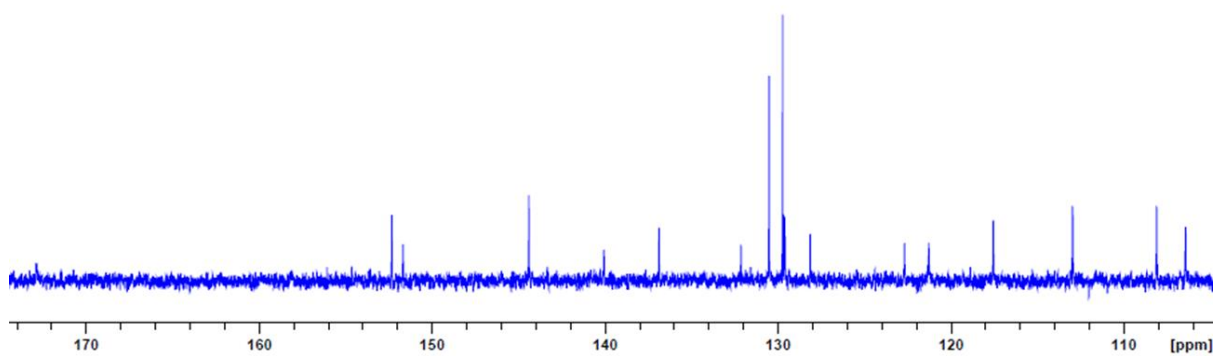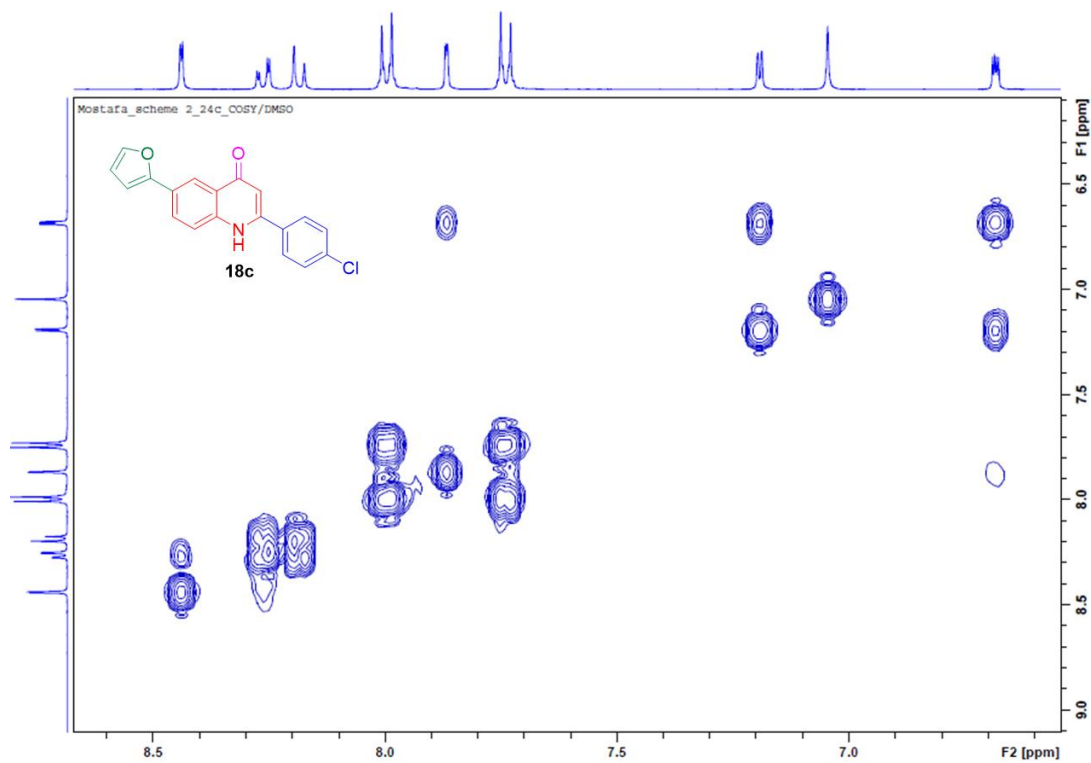

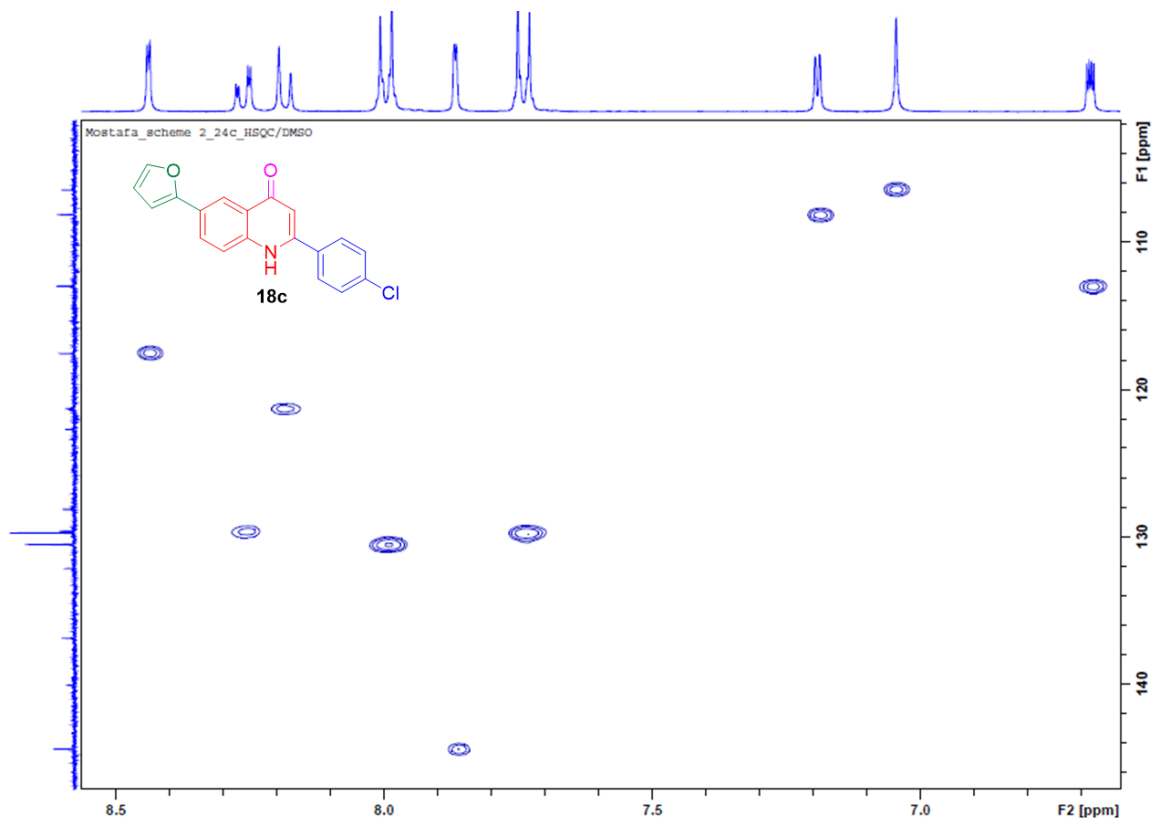

8.2717  
8.2570  
8.1284  
8.1095  
8.0637  
7.9537  
7.9483  
7.9318  
7.9264  
7.6799  
7.6579  
7.4963  
7.4747  
7.2599  
7.1594  
7.0522  
7.0301

4.4722  
4.4575  
4.4428

3.8629  
3.8658  
3.8502

2.4882  
2.4733  
2.4580  
2.4429  
2.4279

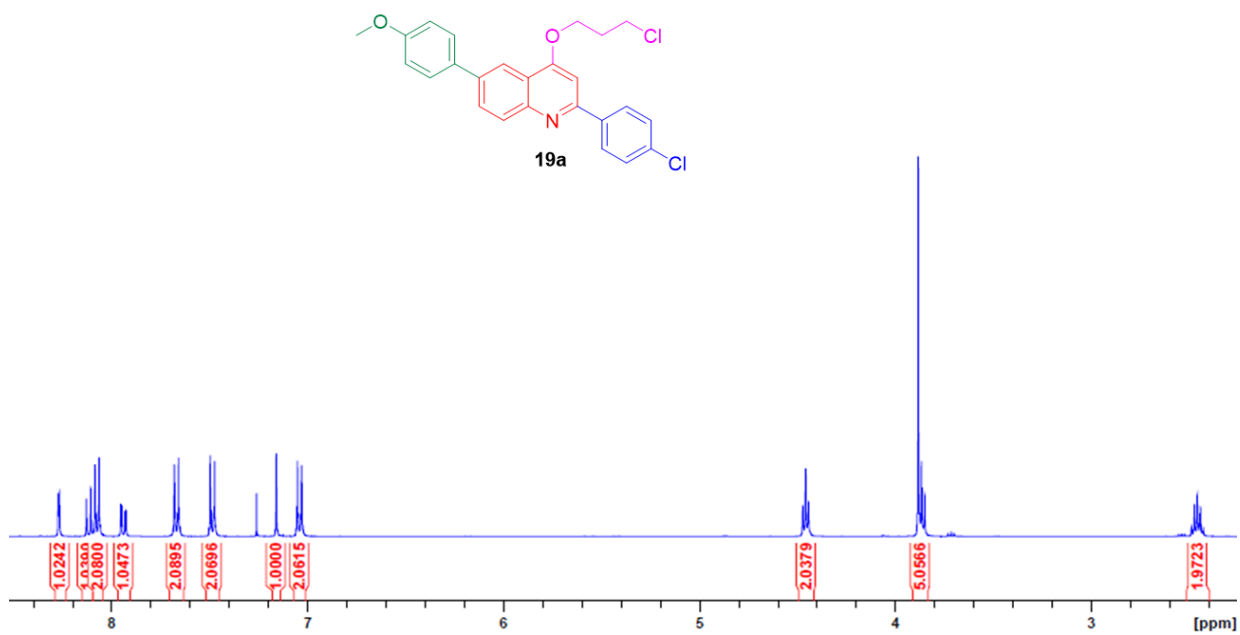

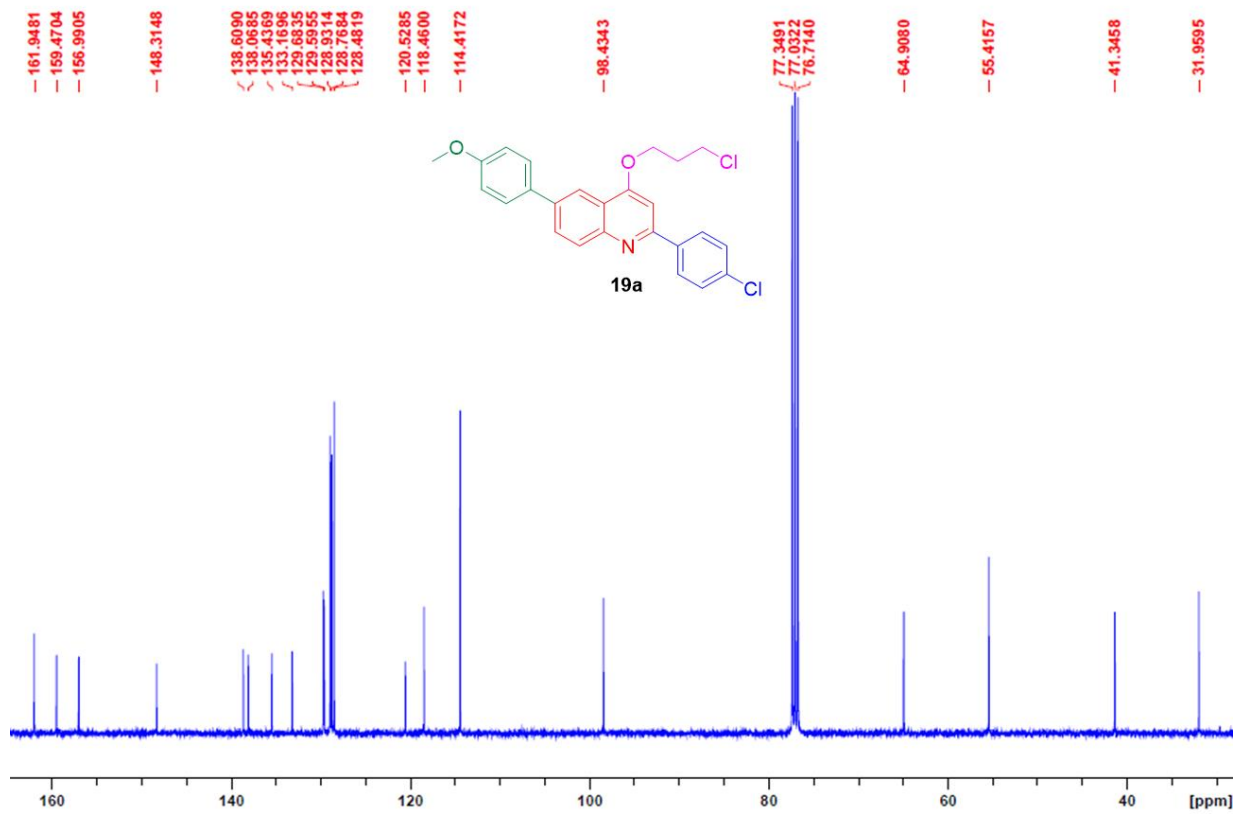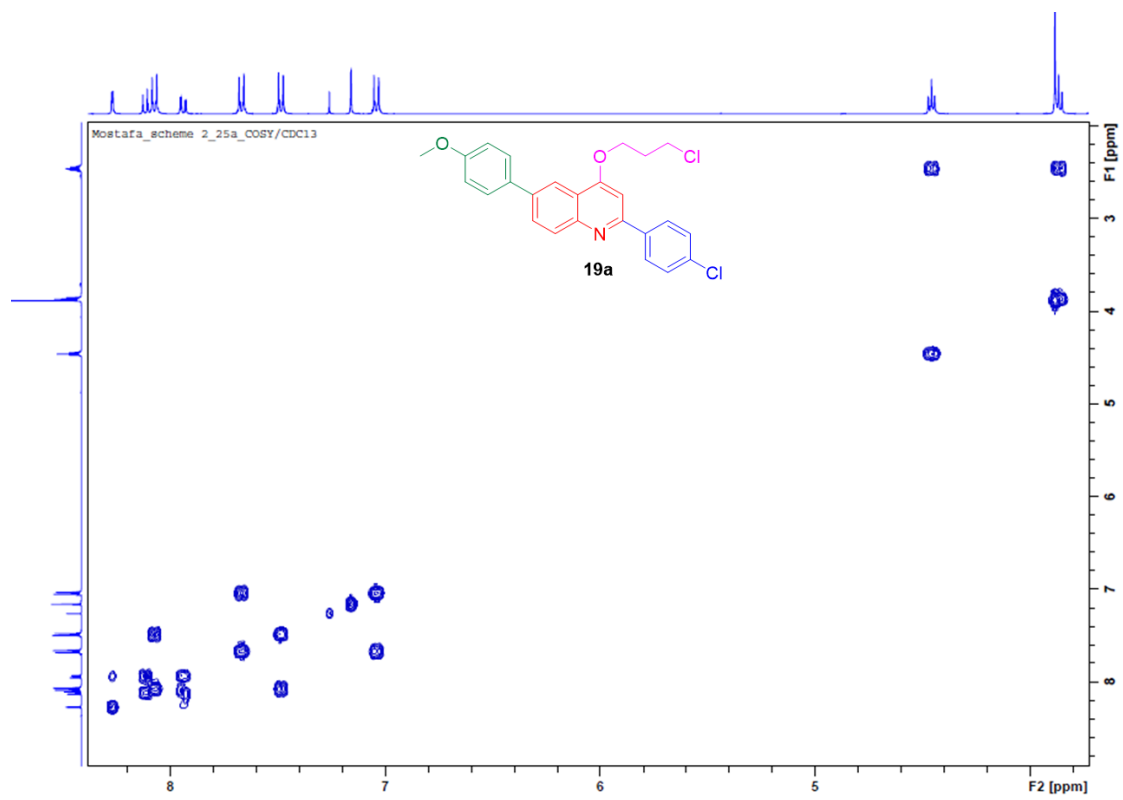

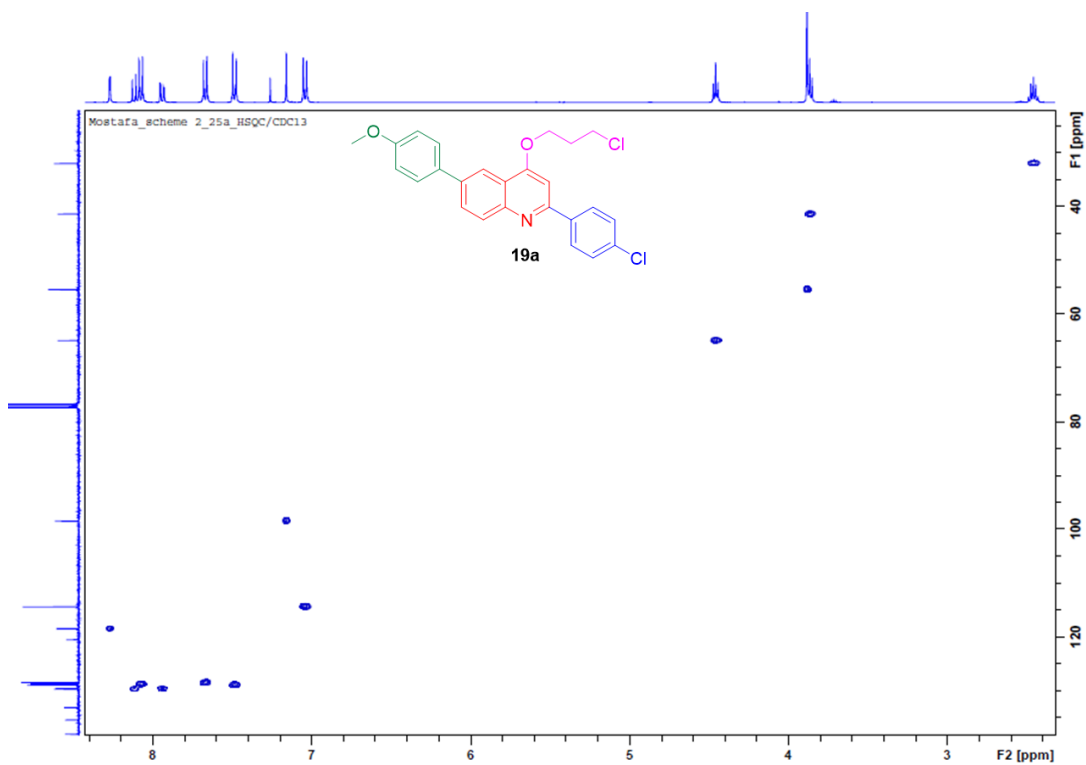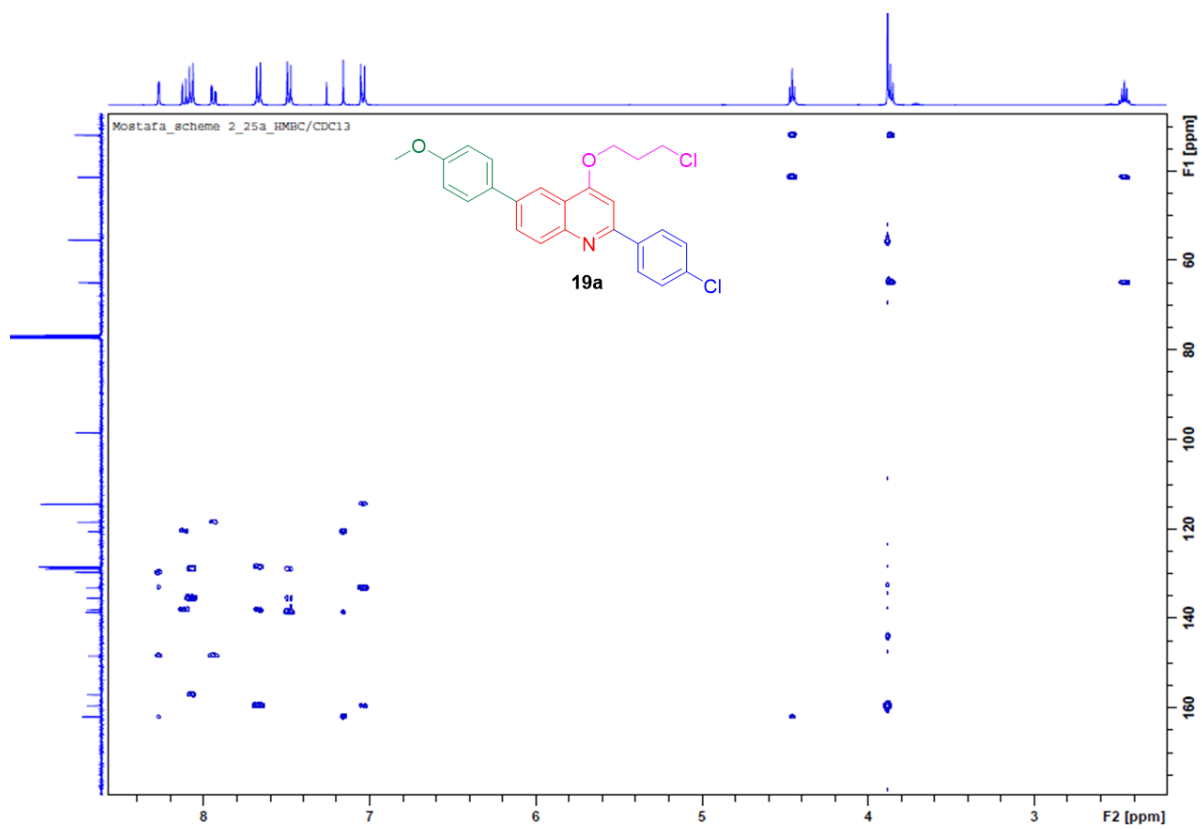

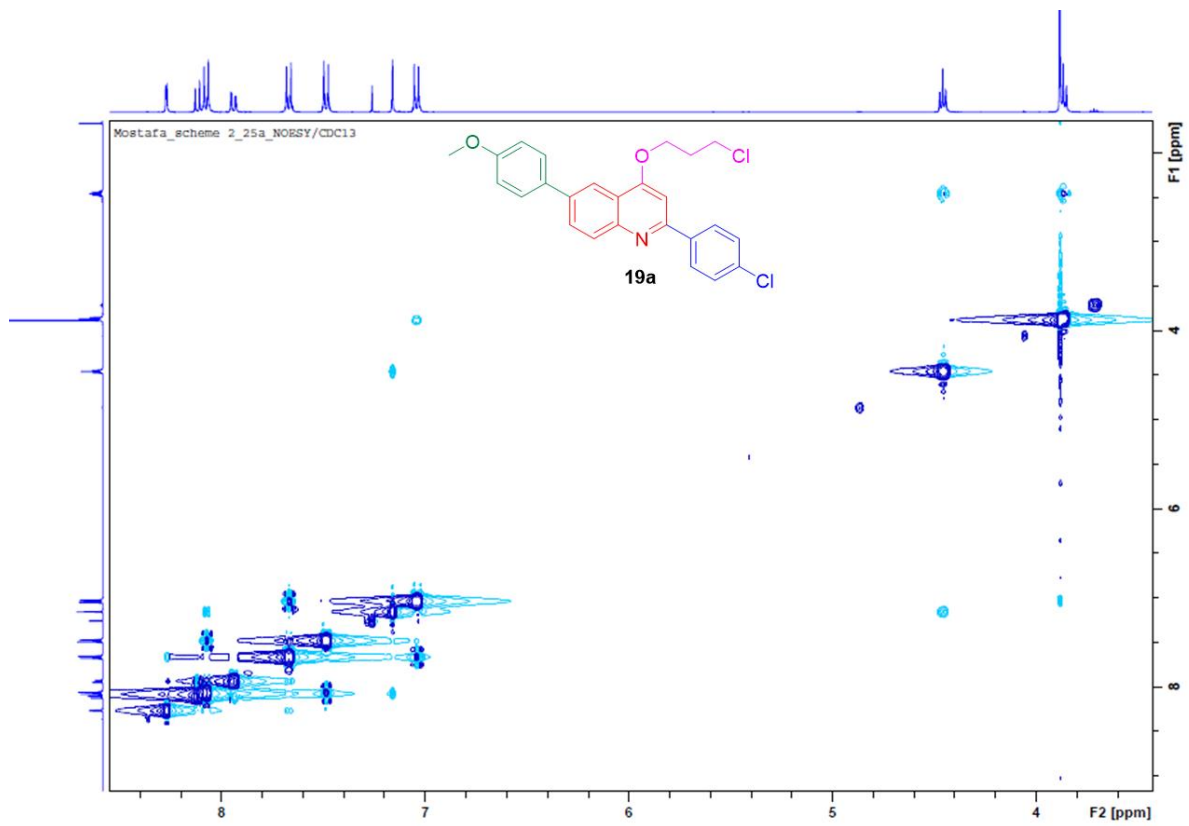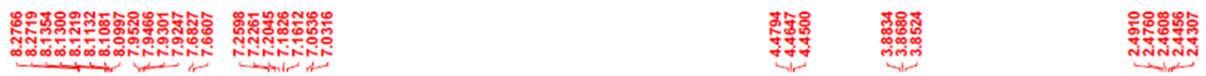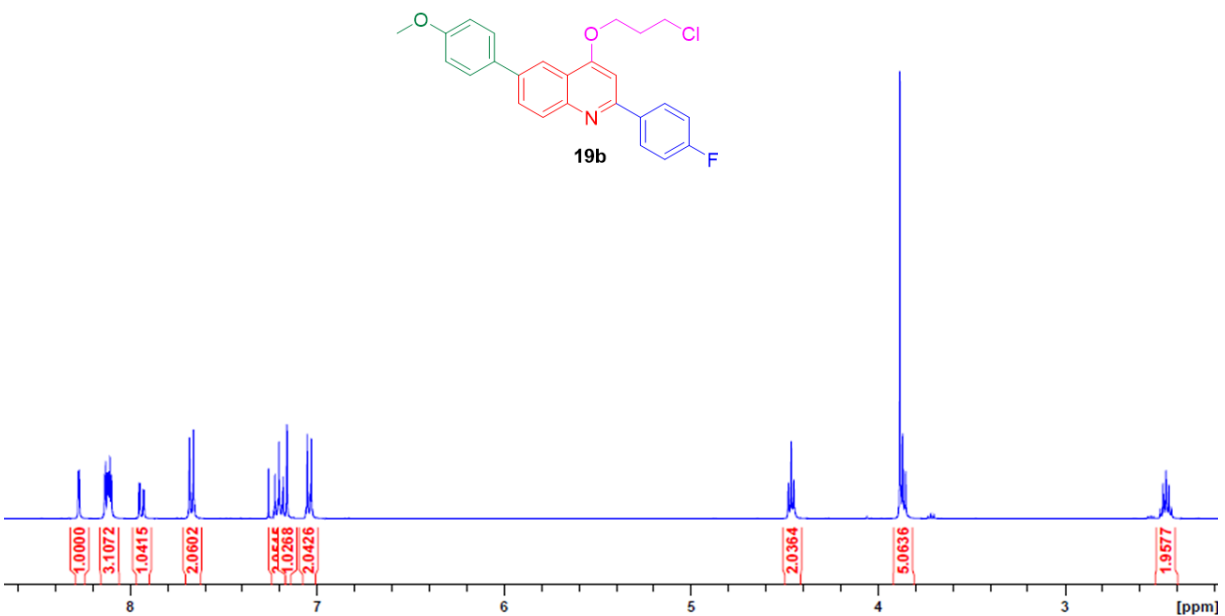



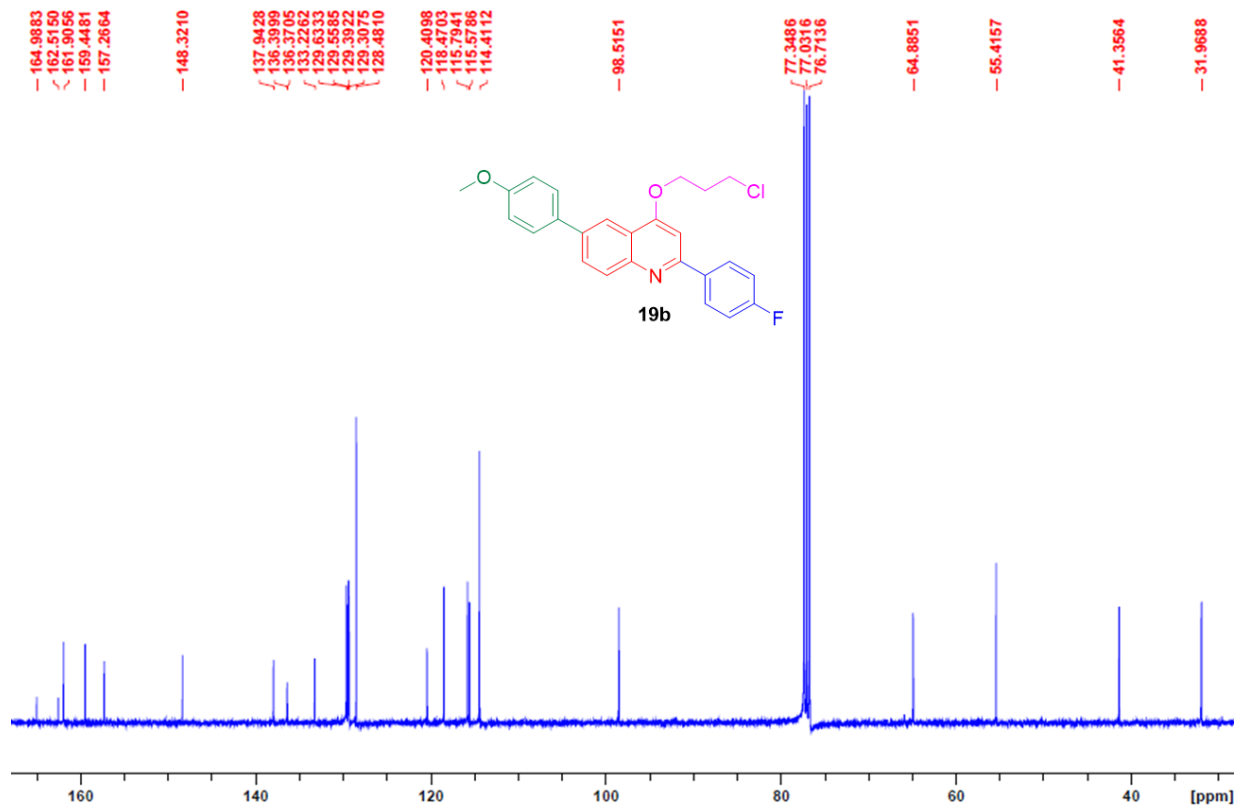

\_19F/CDCl3

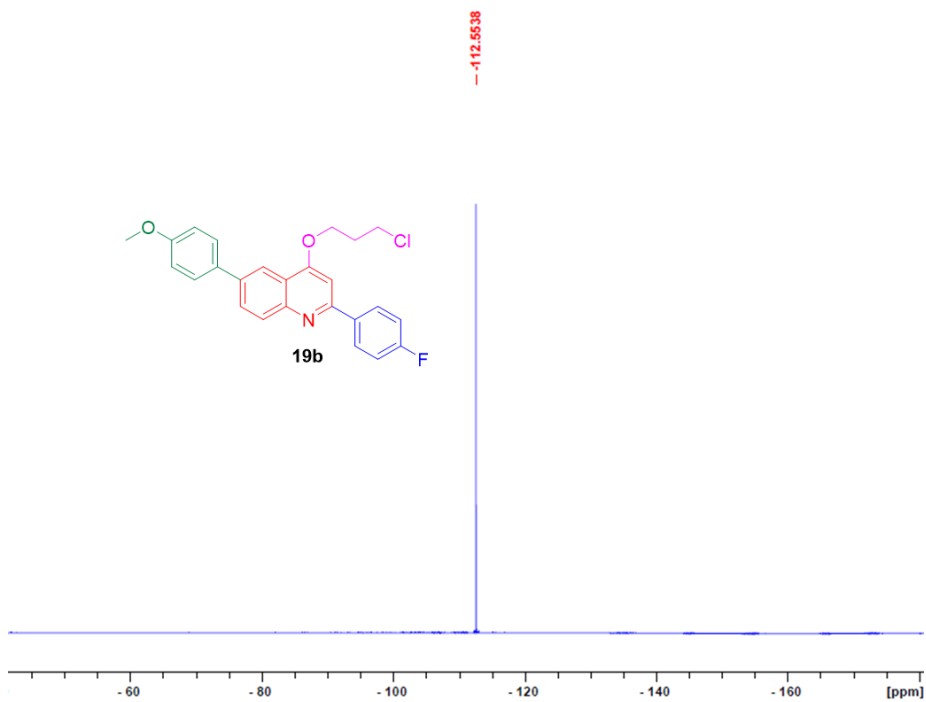

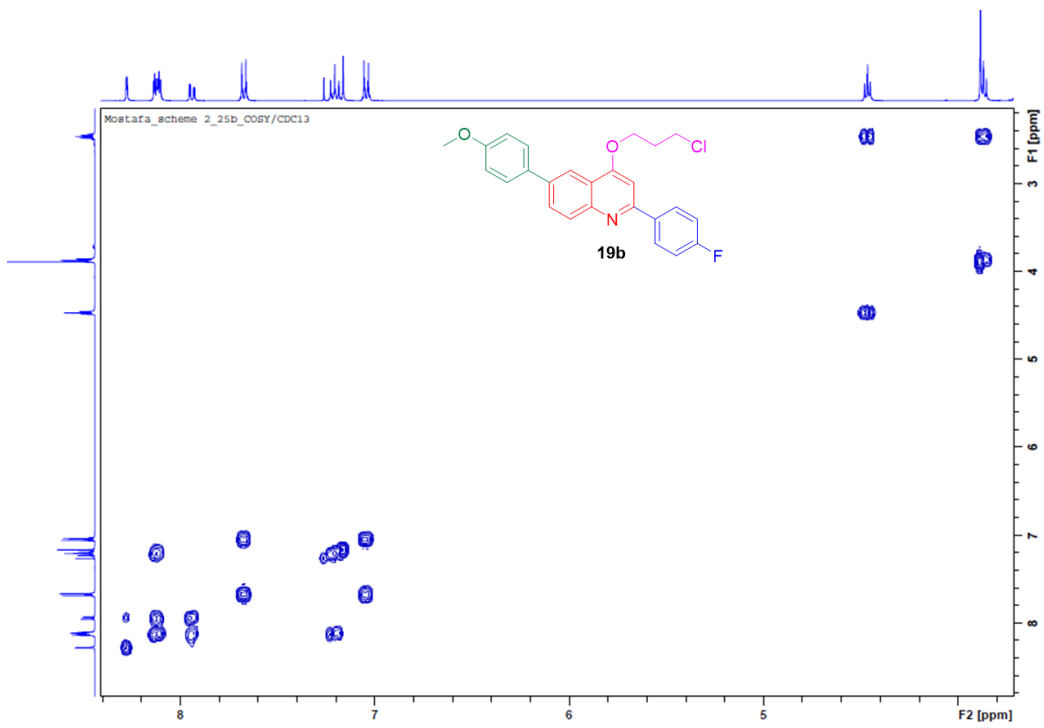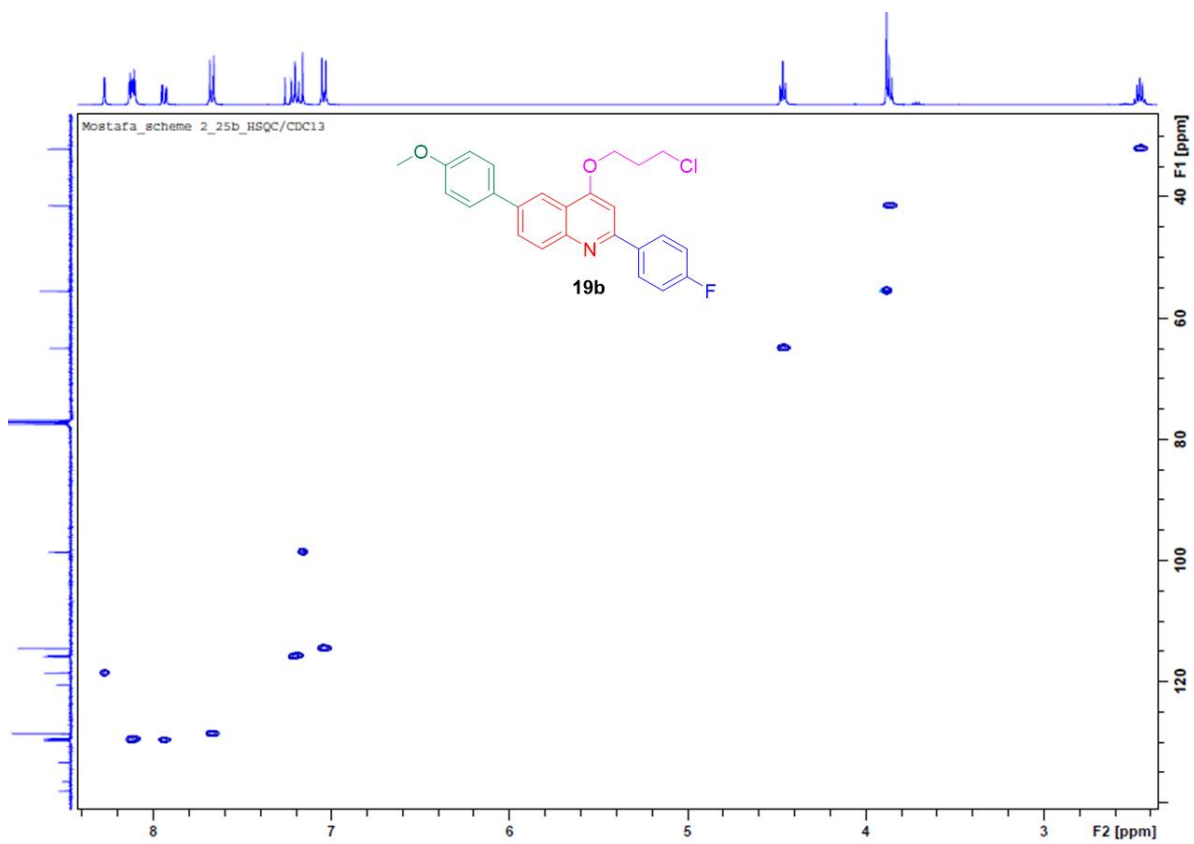

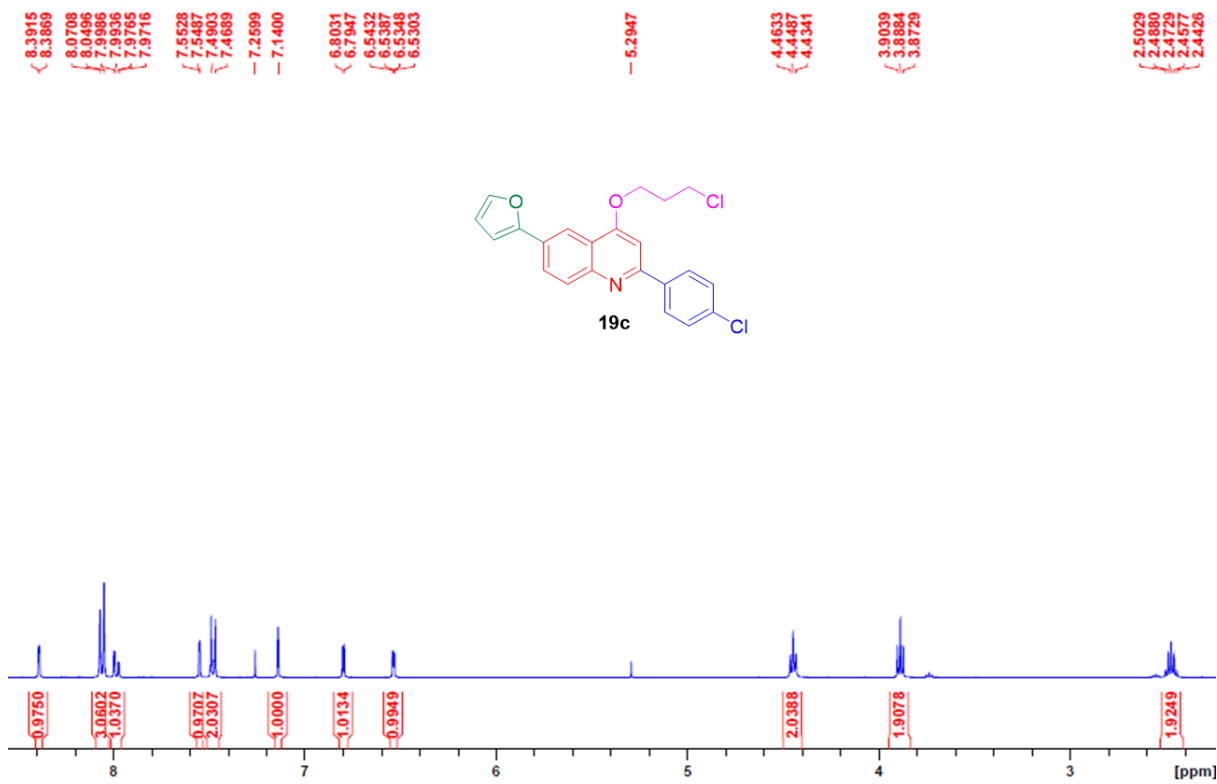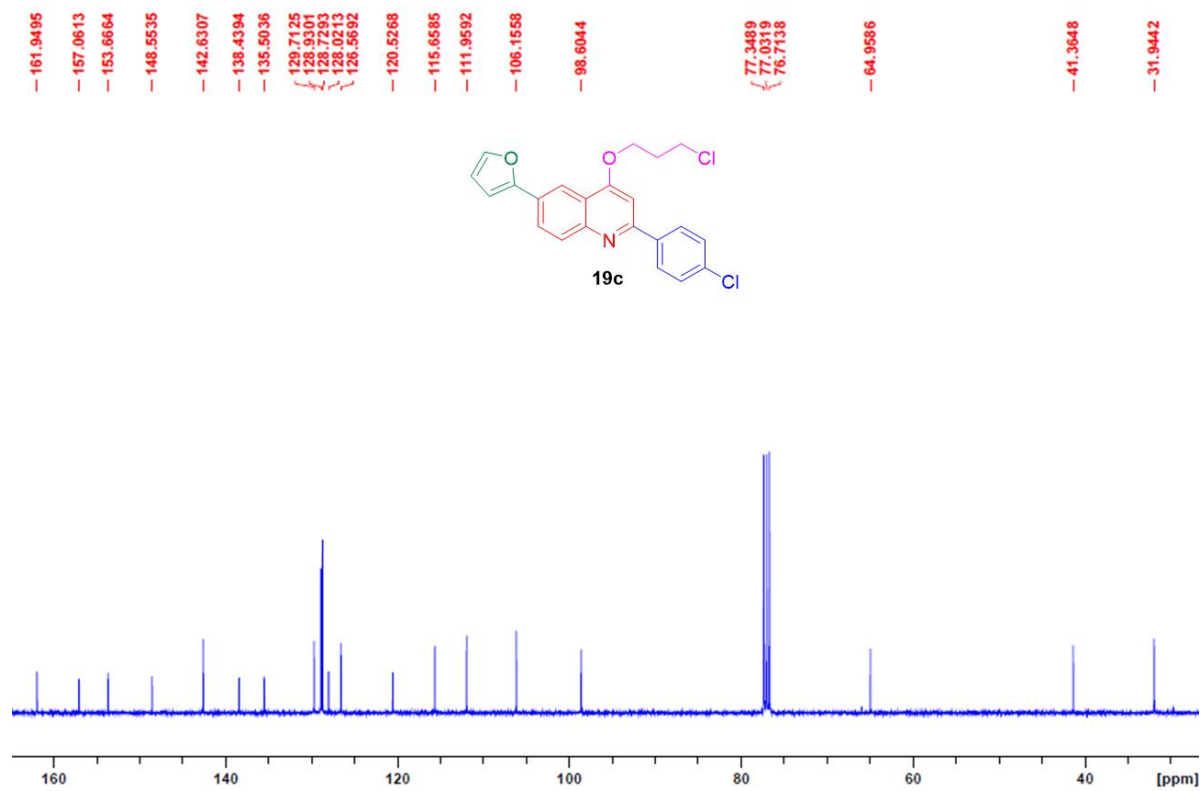

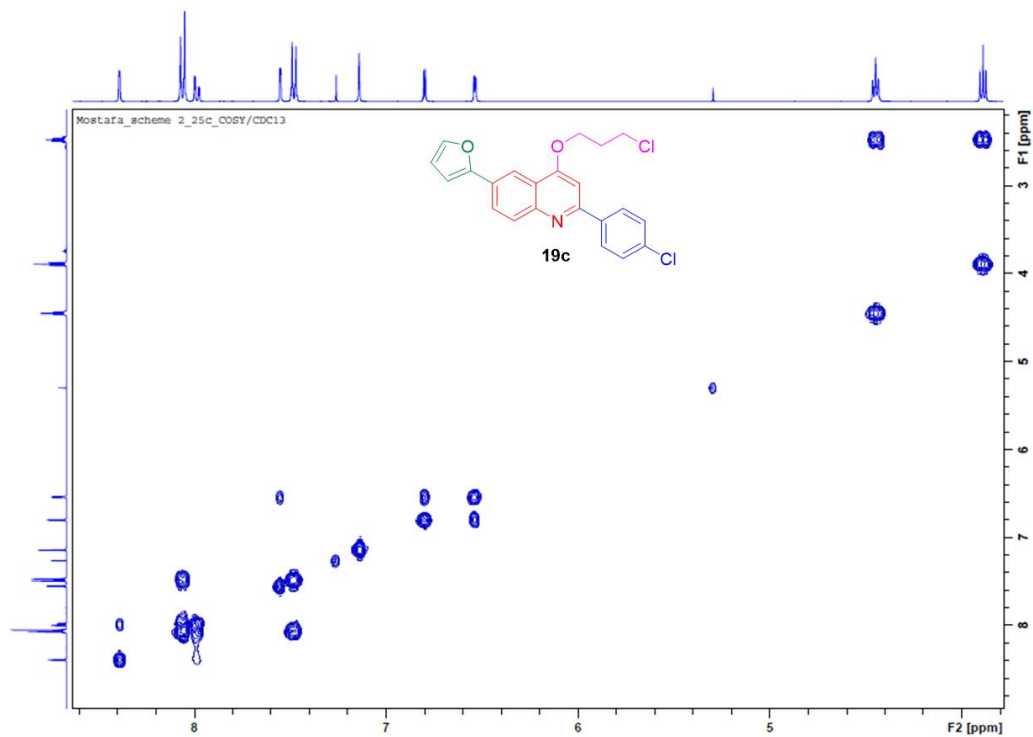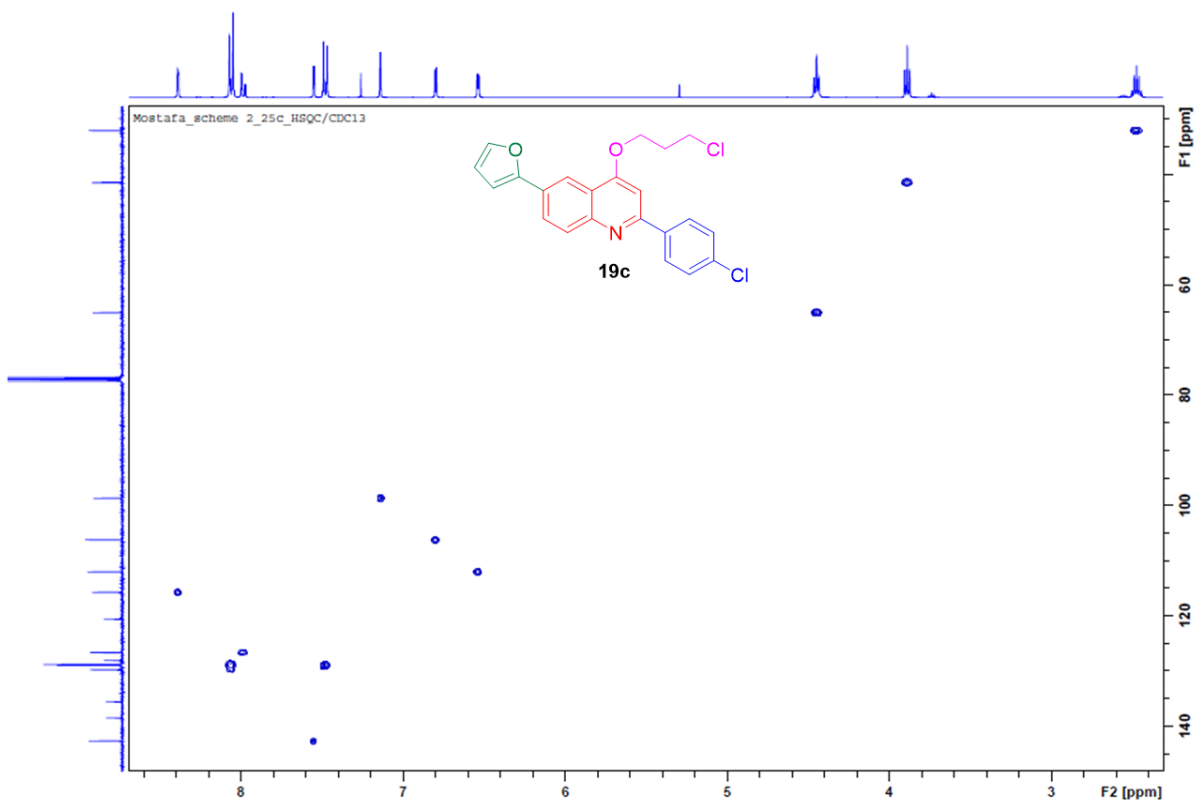

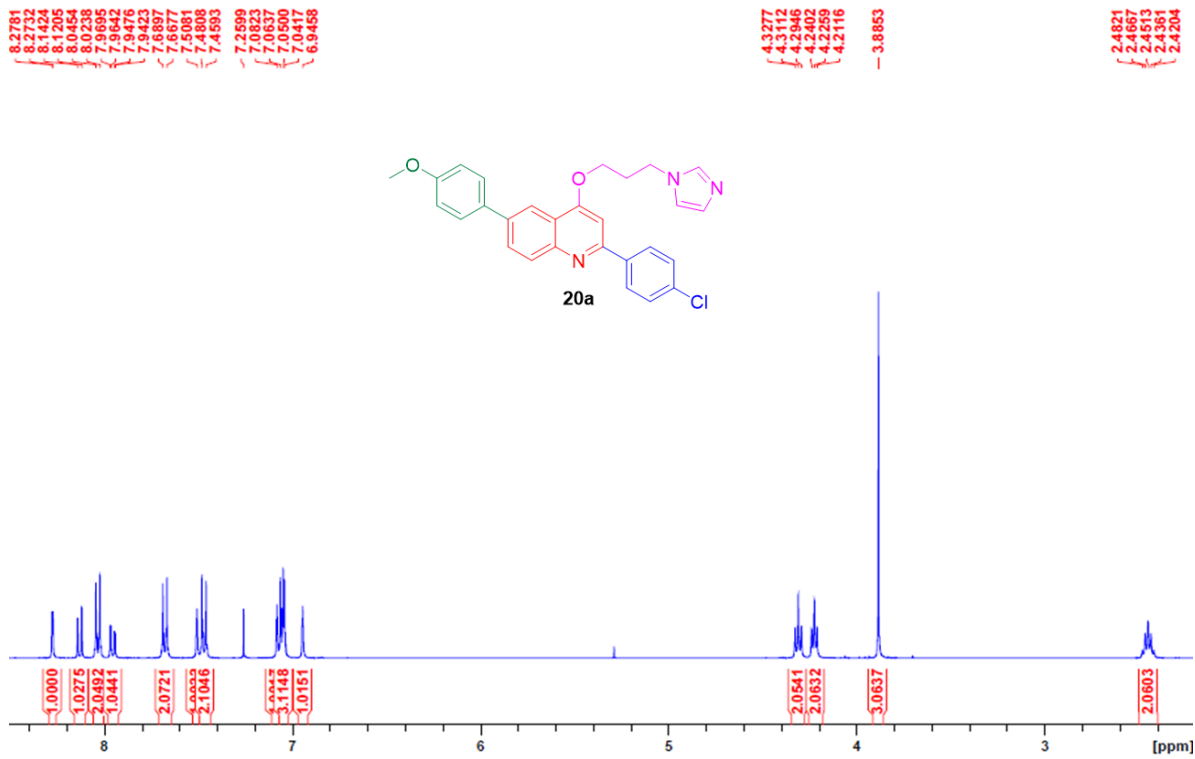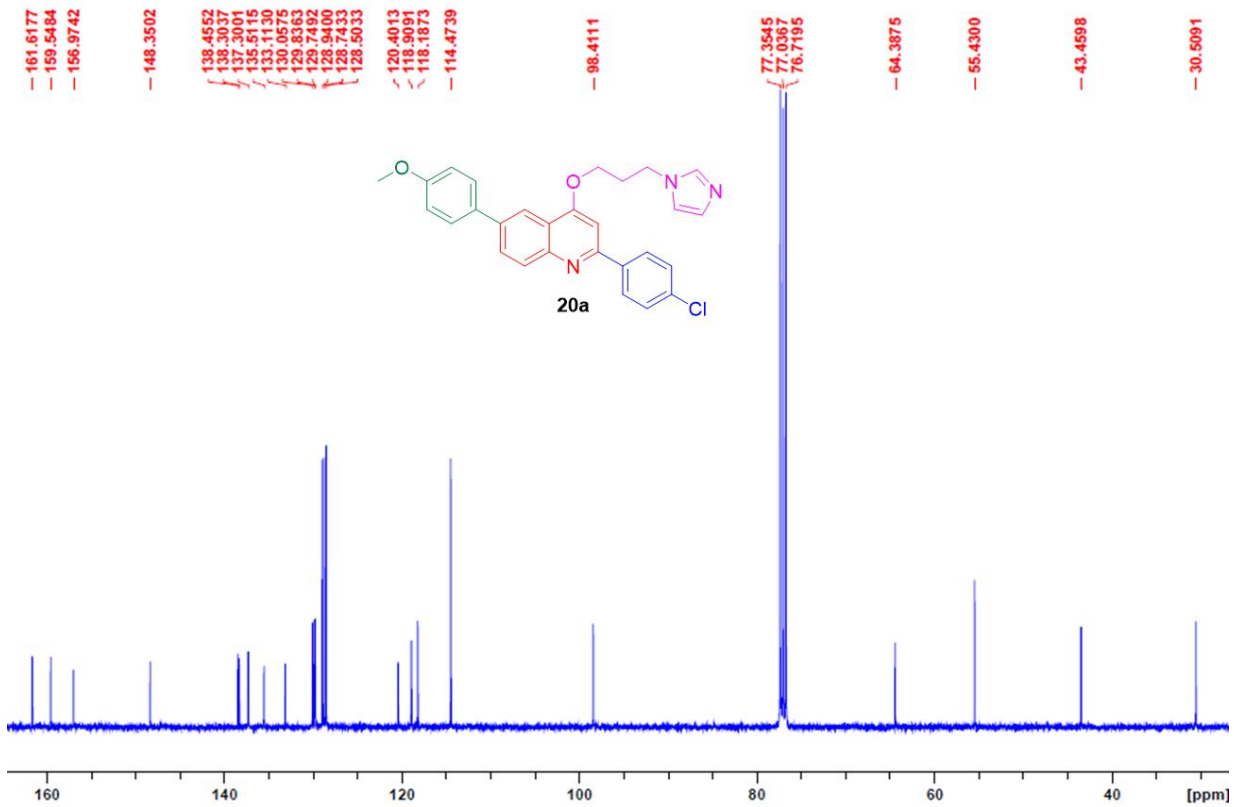

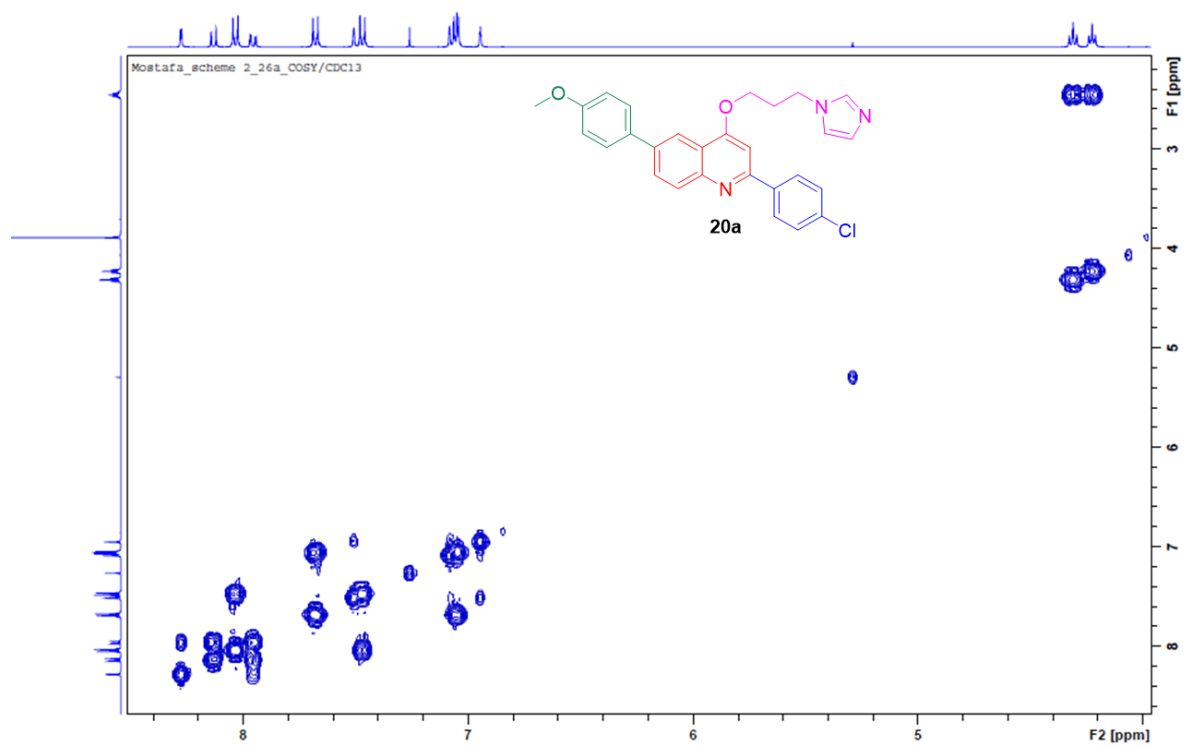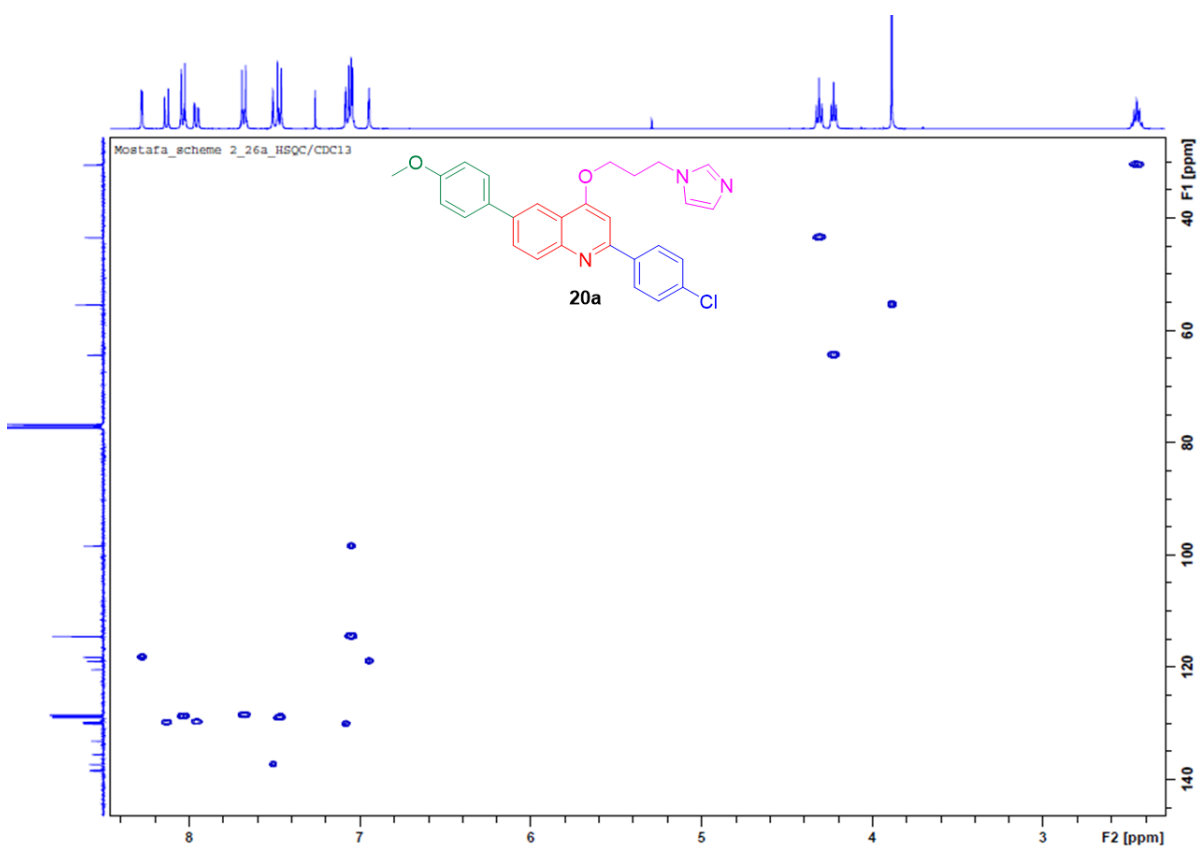

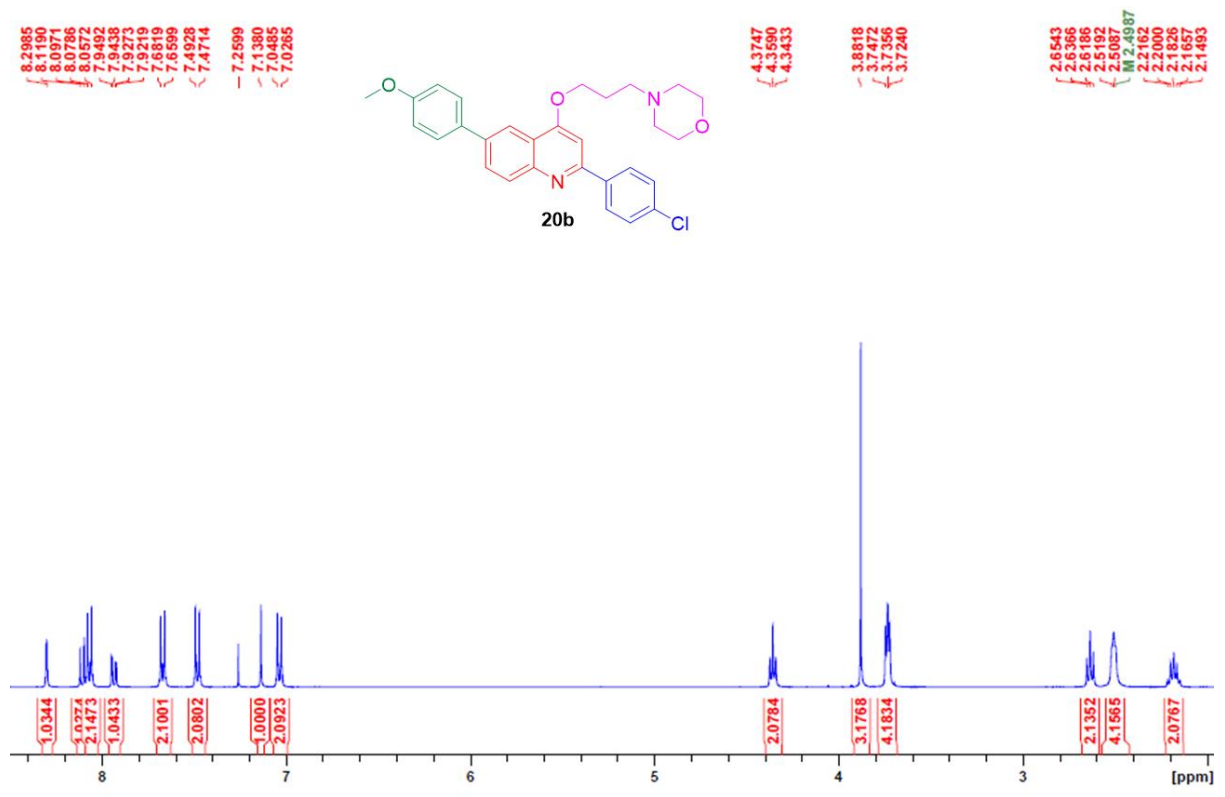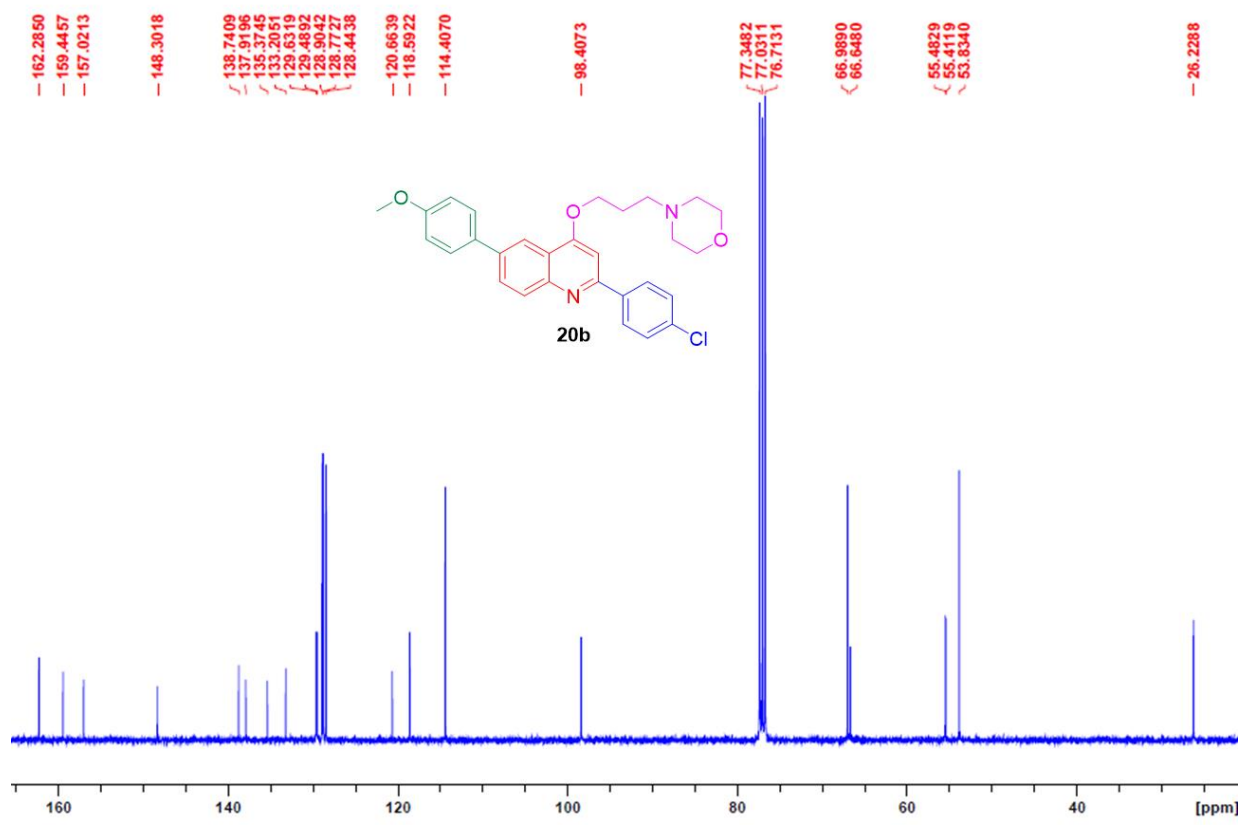

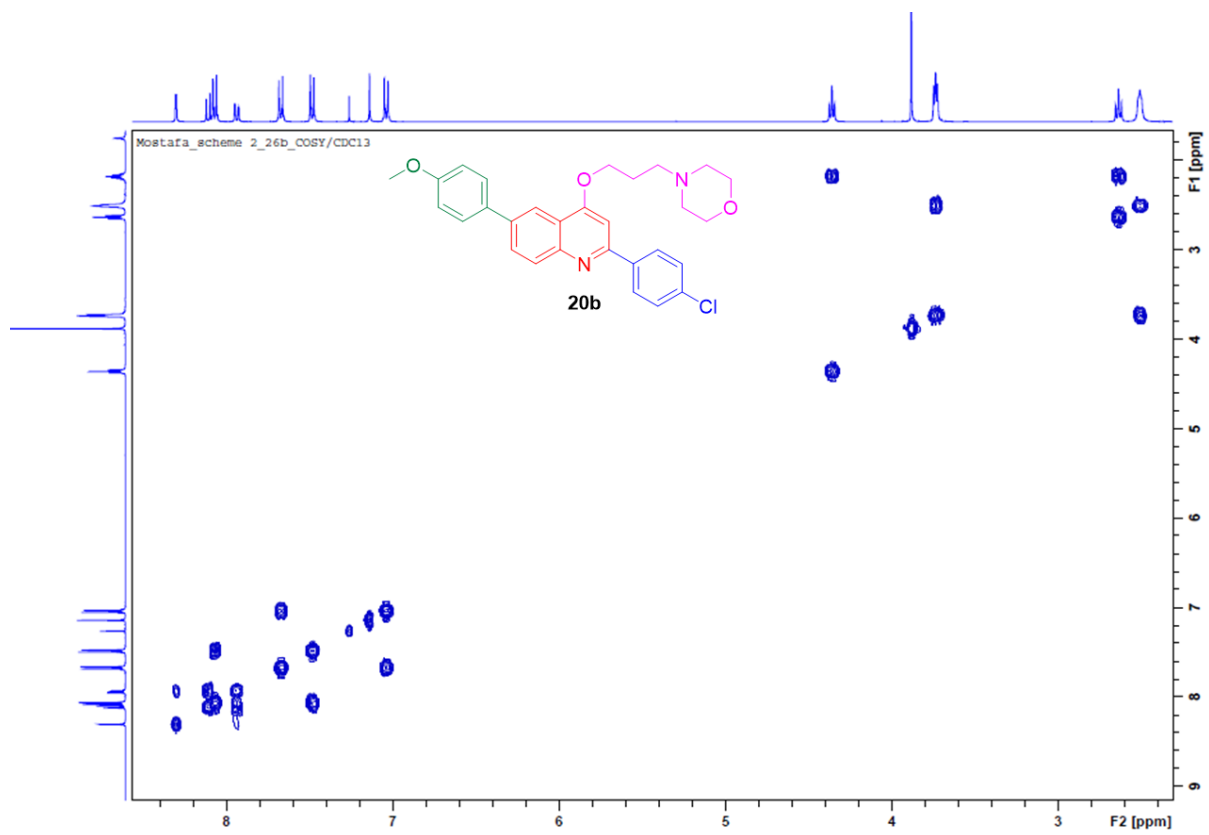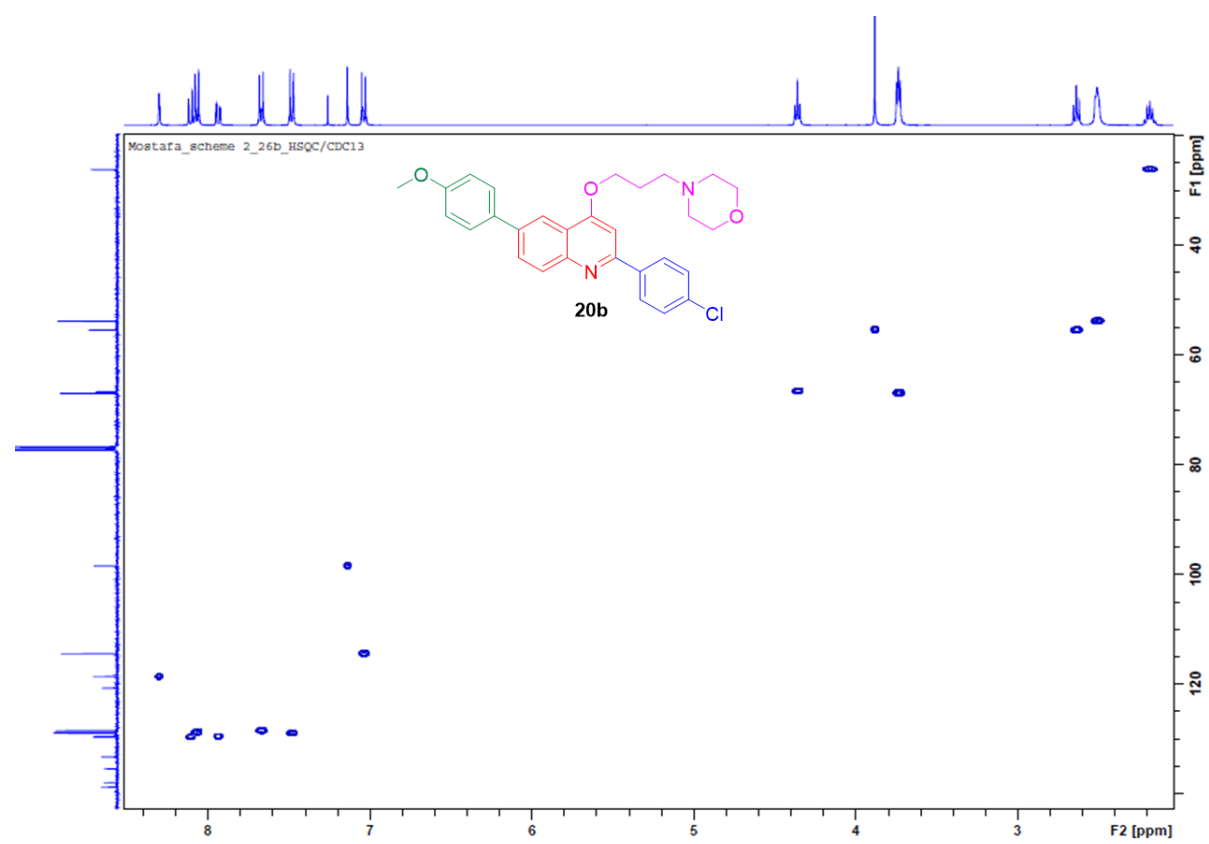



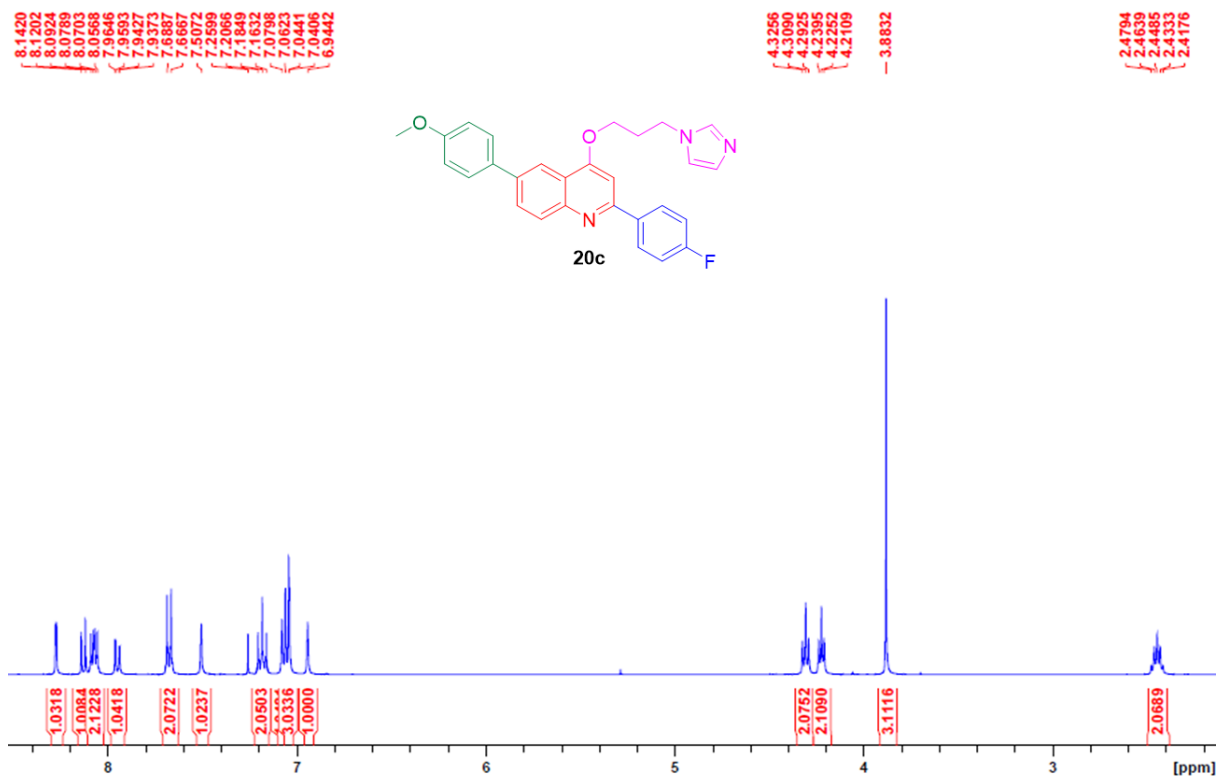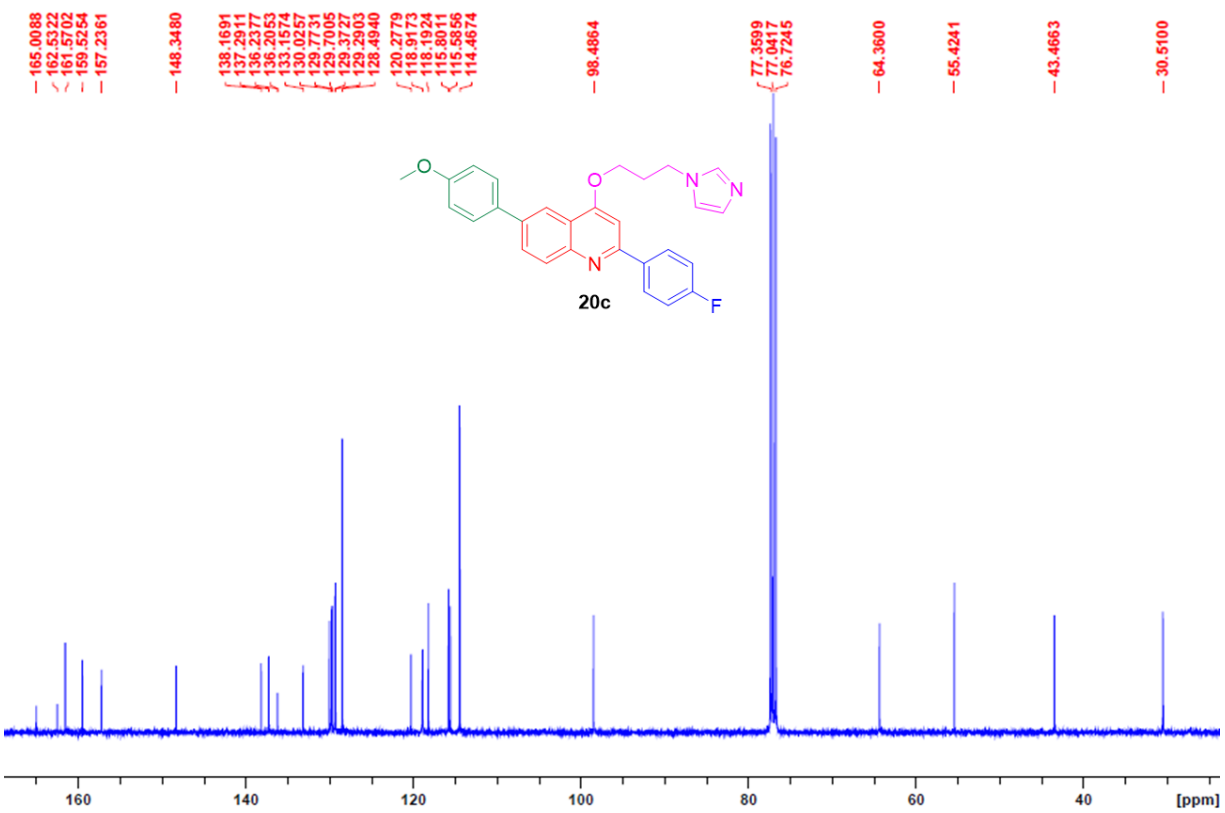

\_19F/CDC13

-112.3946

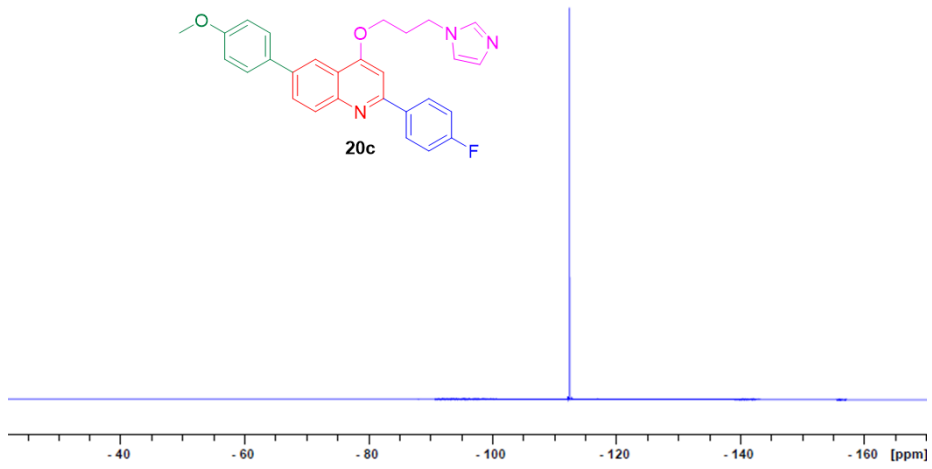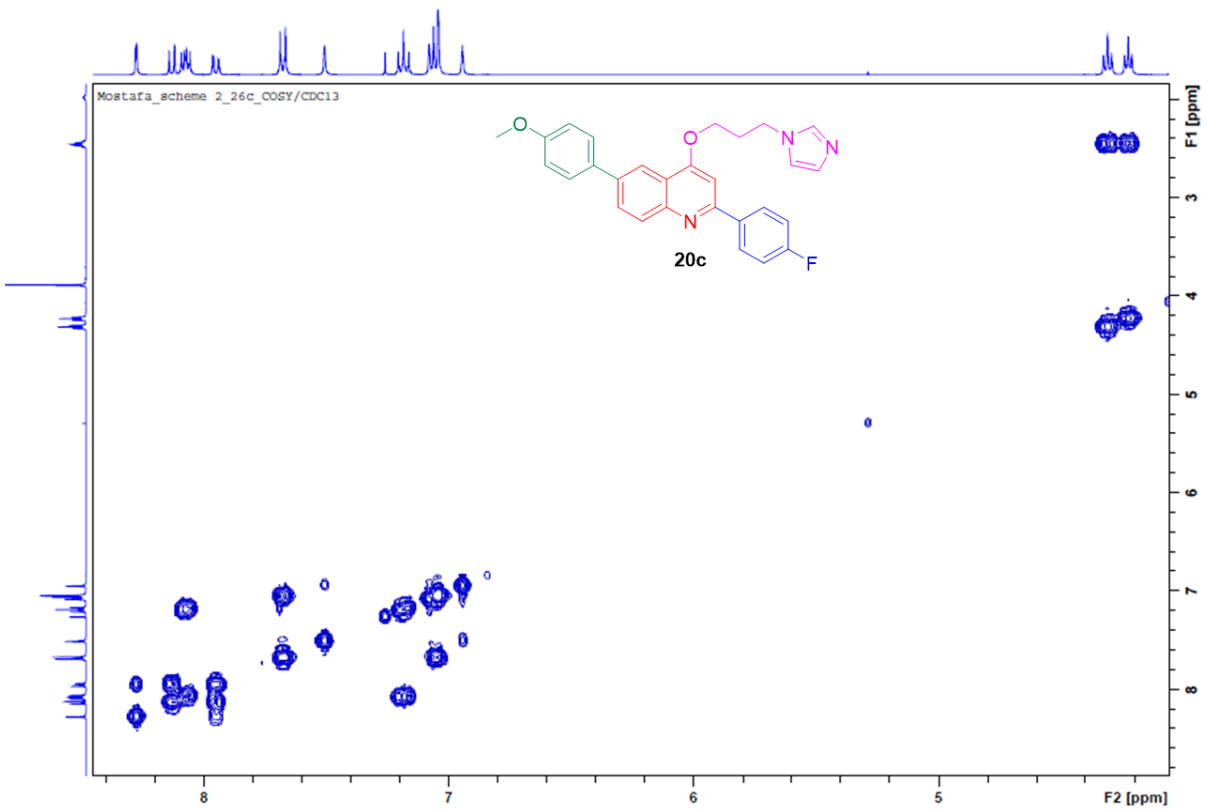

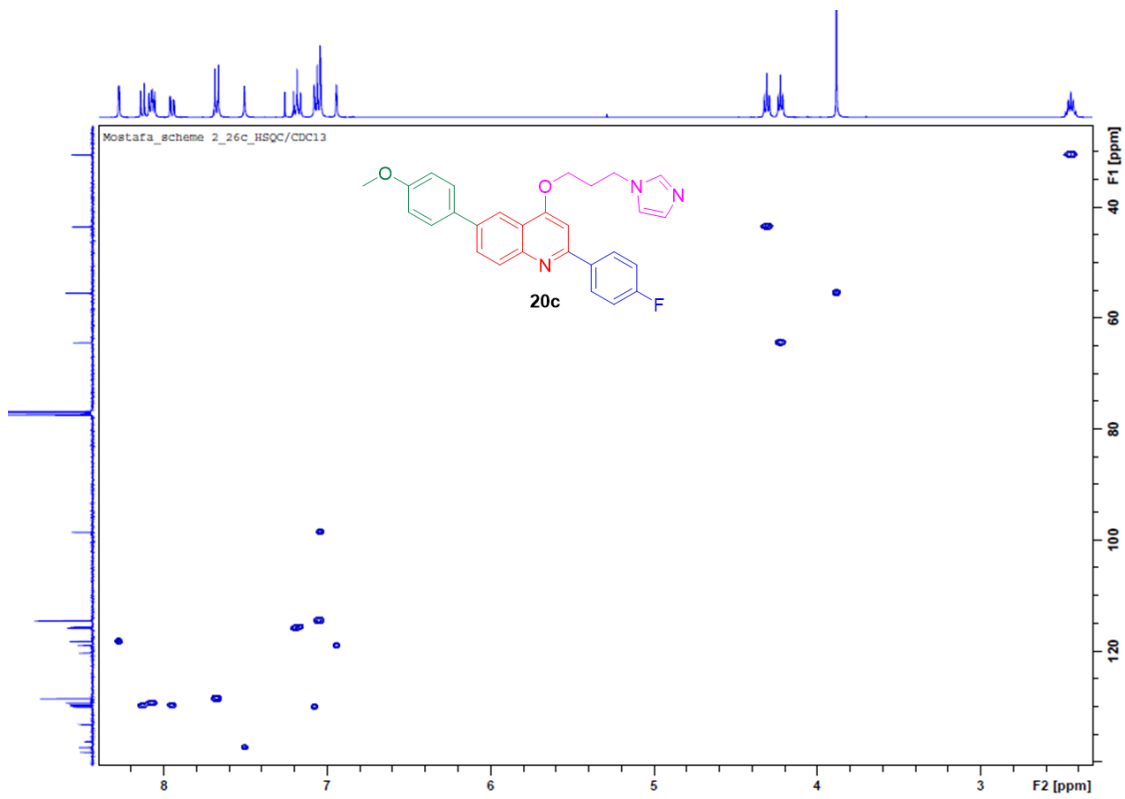

8.3022  
8.1276  
8.1205  
8.1141  
8.1055  
8.0978  
8.0920  
7.9470  
7.9216  
7.9251  
7.9197  
7.6839  
7.6819  
7.2599  
7.2218  
7.2001  
7.1783  
7.1386  
7.0496  
7.0276

4.3818  
4.3661  
4.3504  
3.8825  
3.7466  
3.7350  
3.7234

2.6566  
2.6390  
2.6210  
2.5204  
2.5097  
2.4993  
2.2190  
2.2028  
2.1853  
2.1685  
2.1521

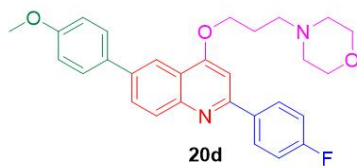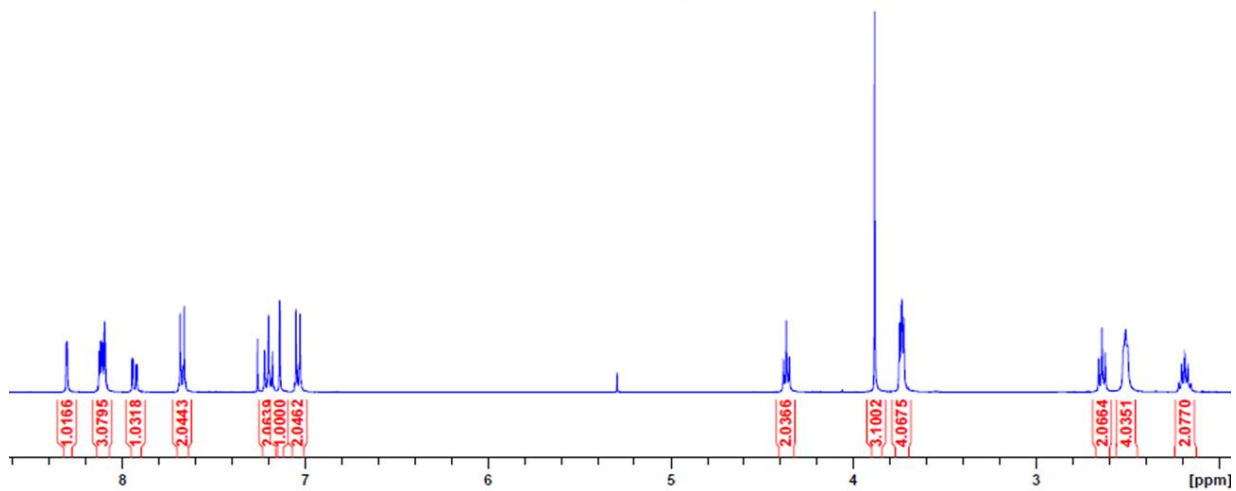

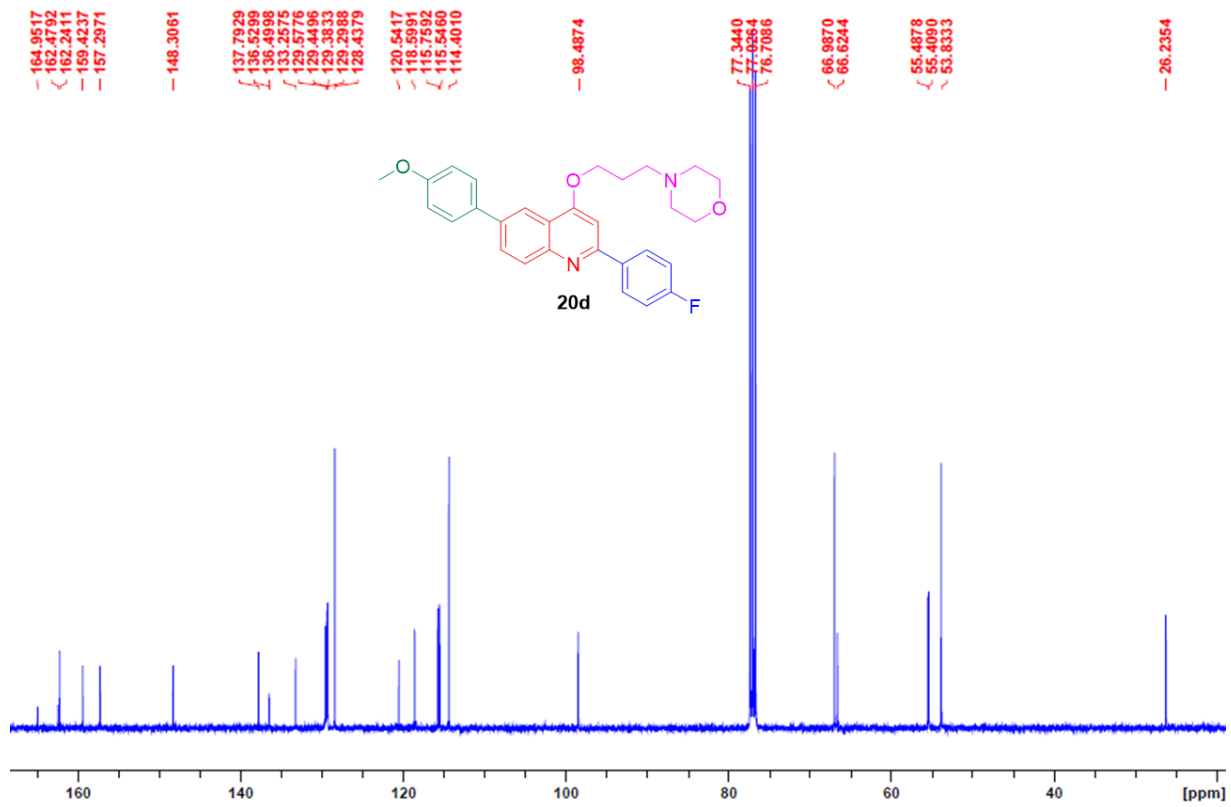

19F/CDCl<sub>3</sub>

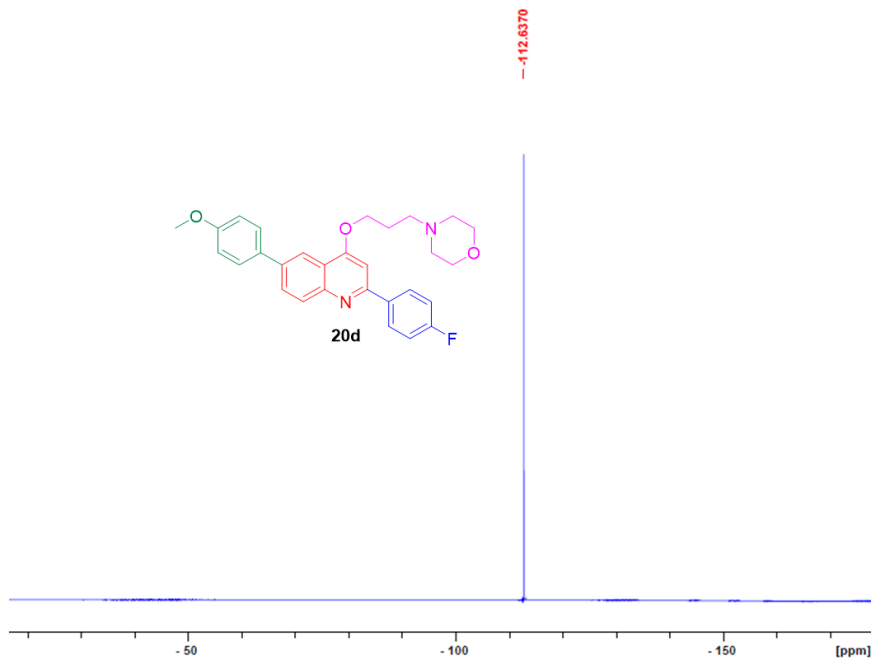

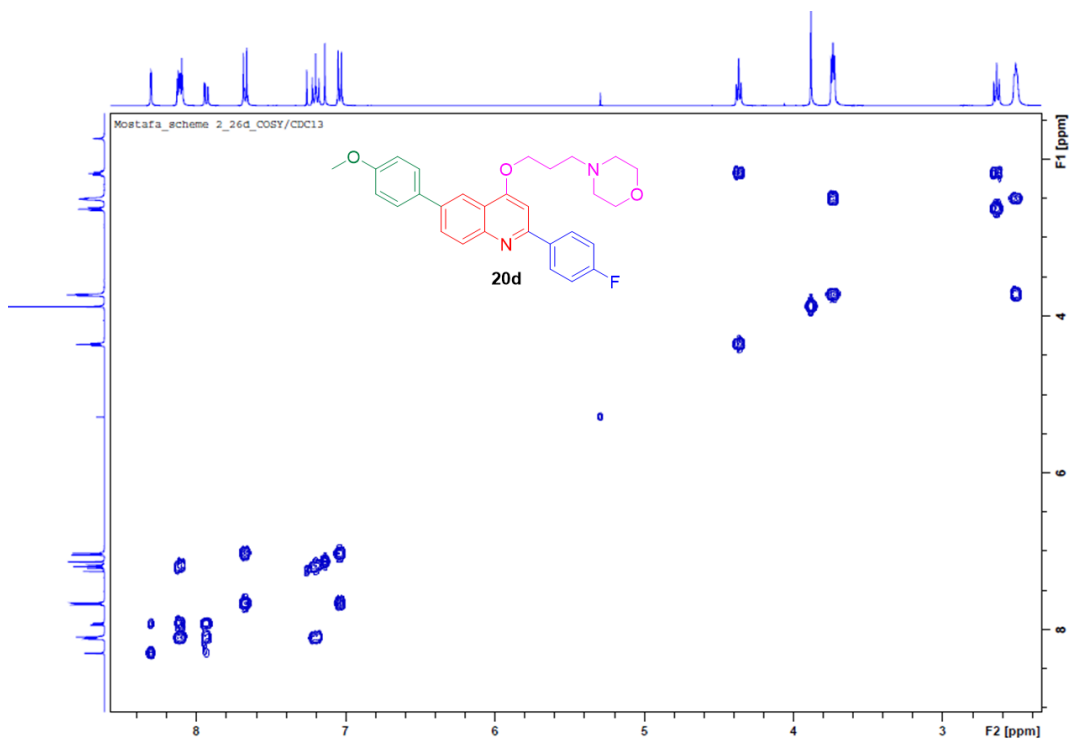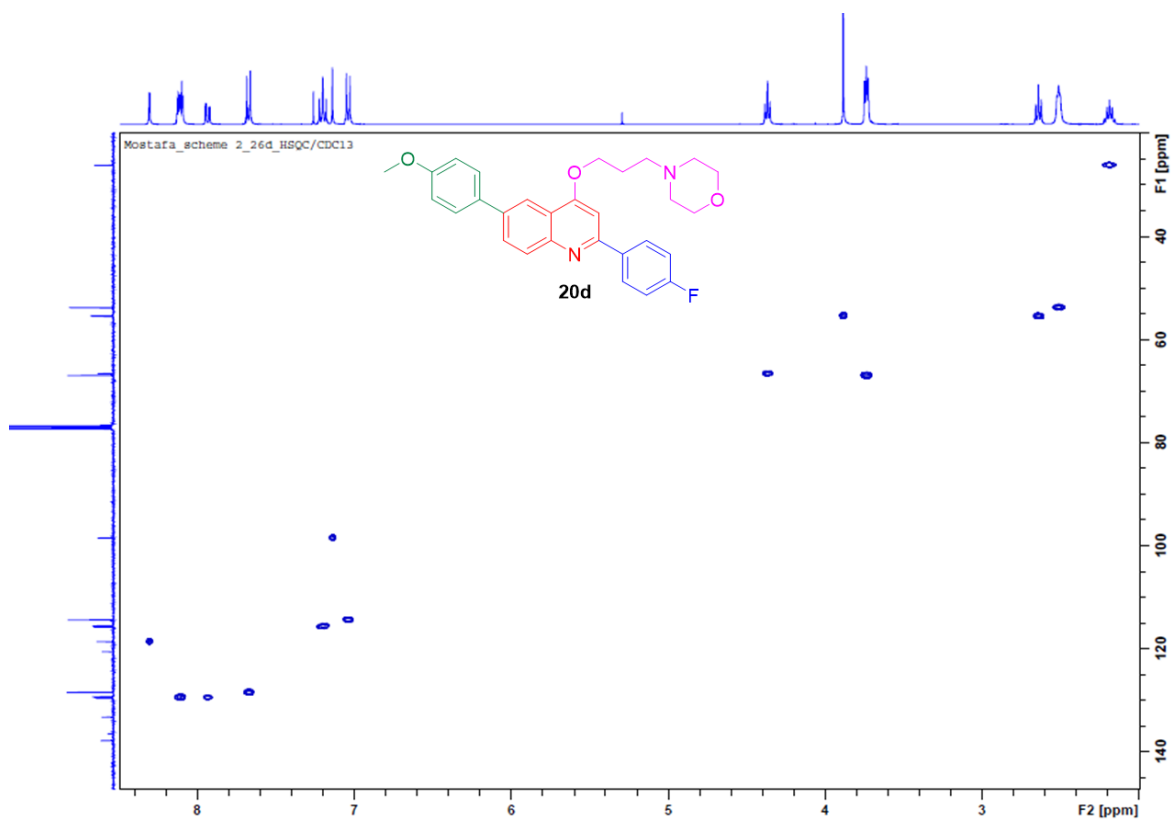

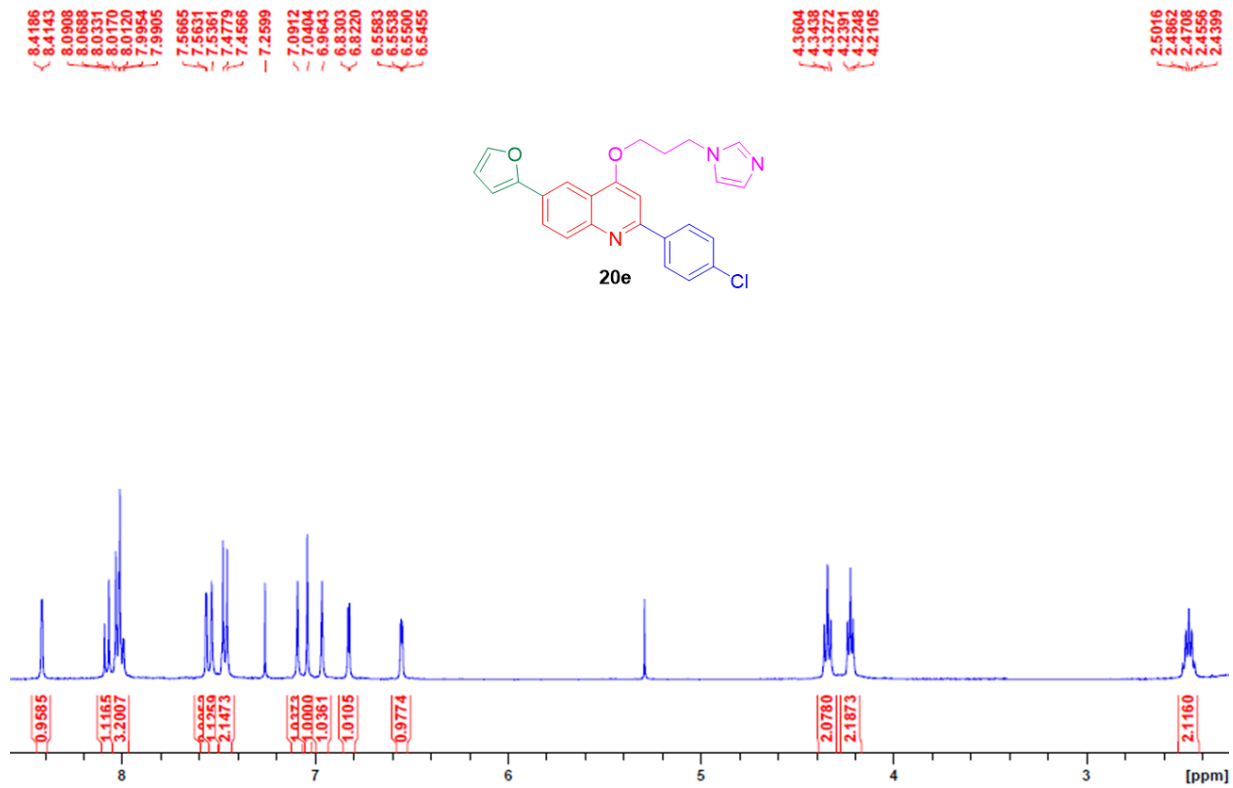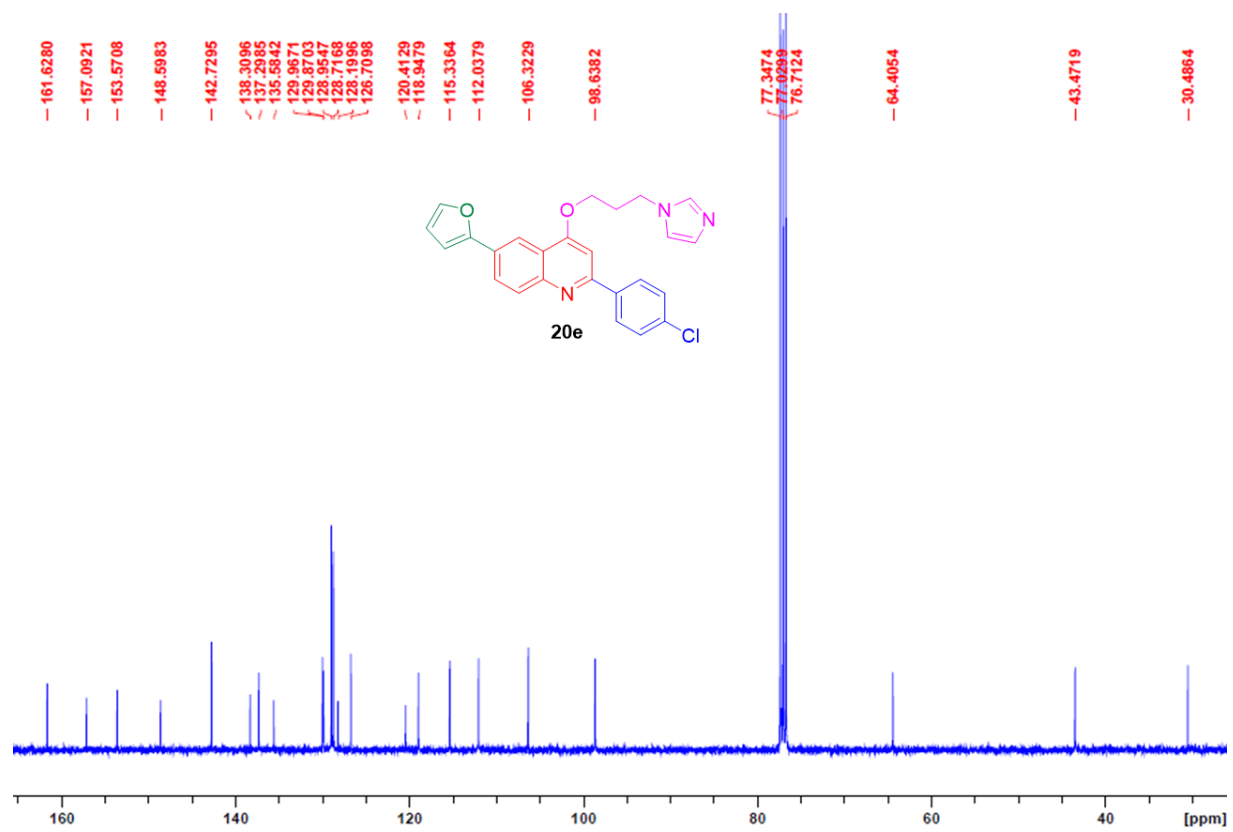

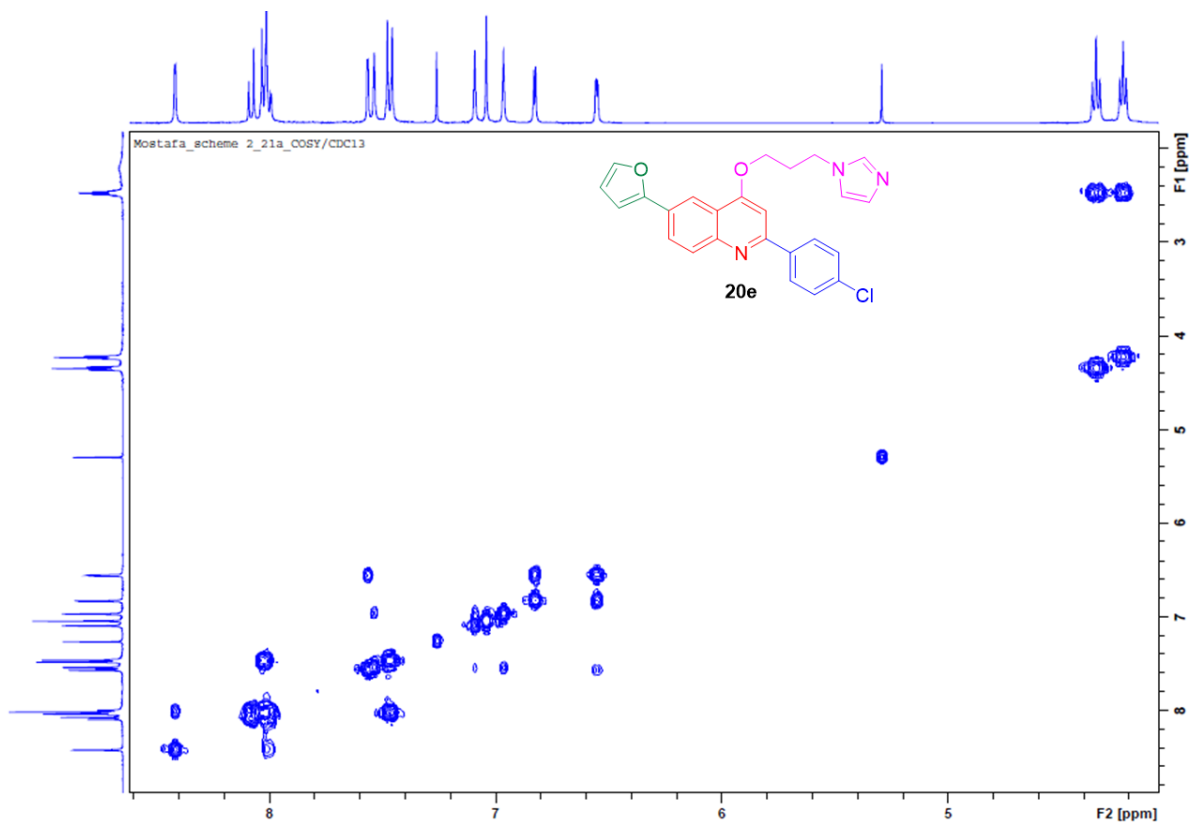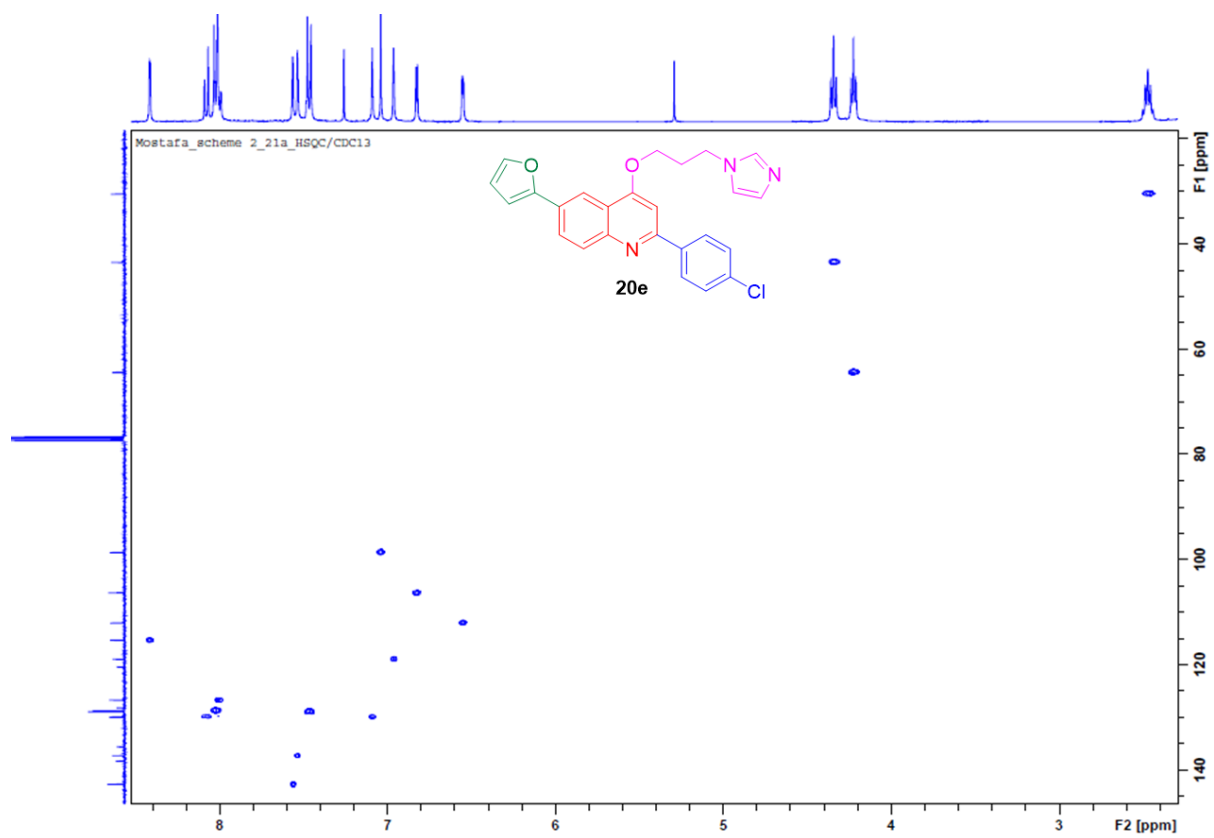

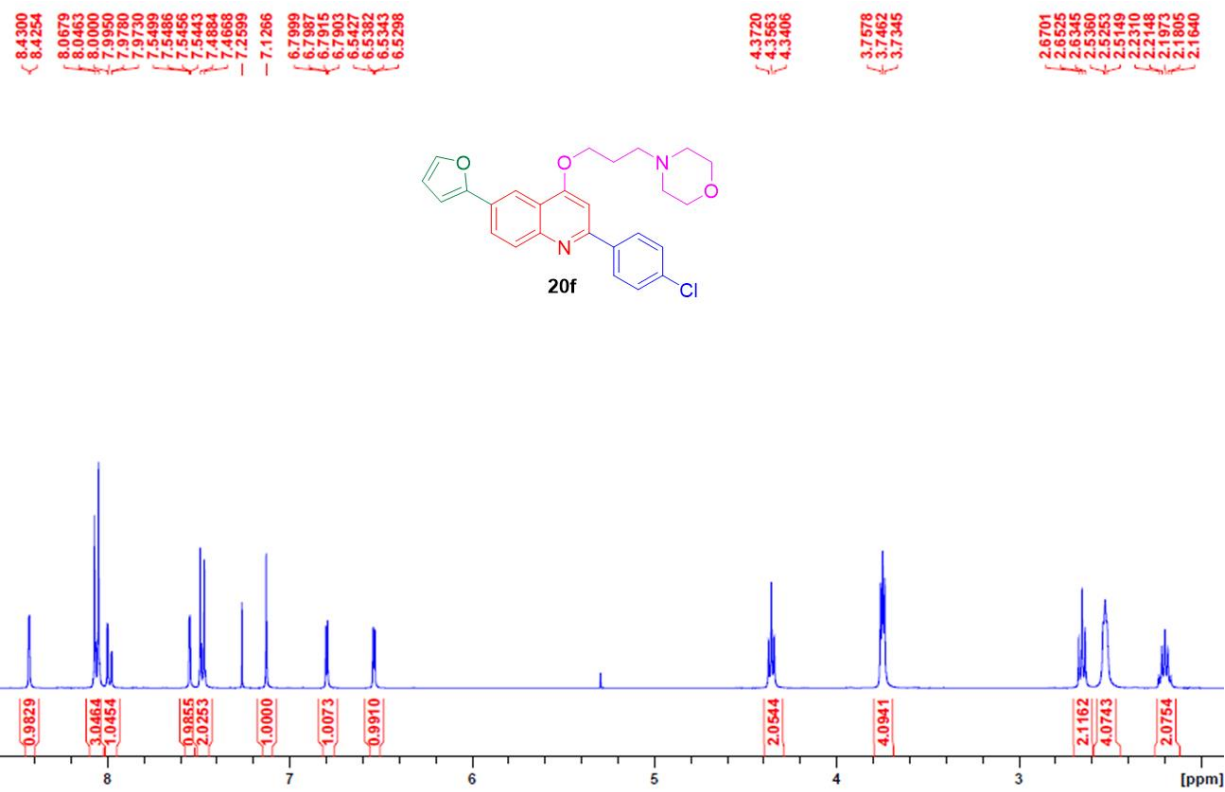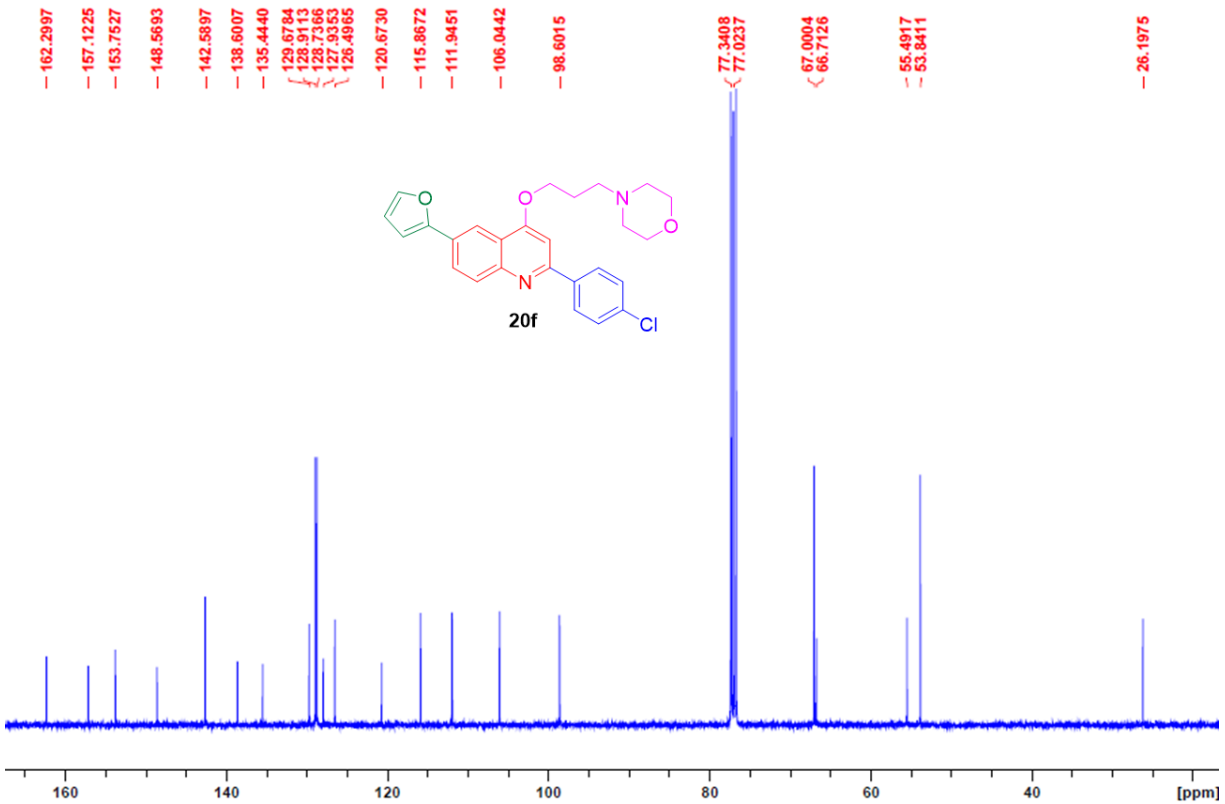





## Topoisomerase I-mediated DNA cleavage assay

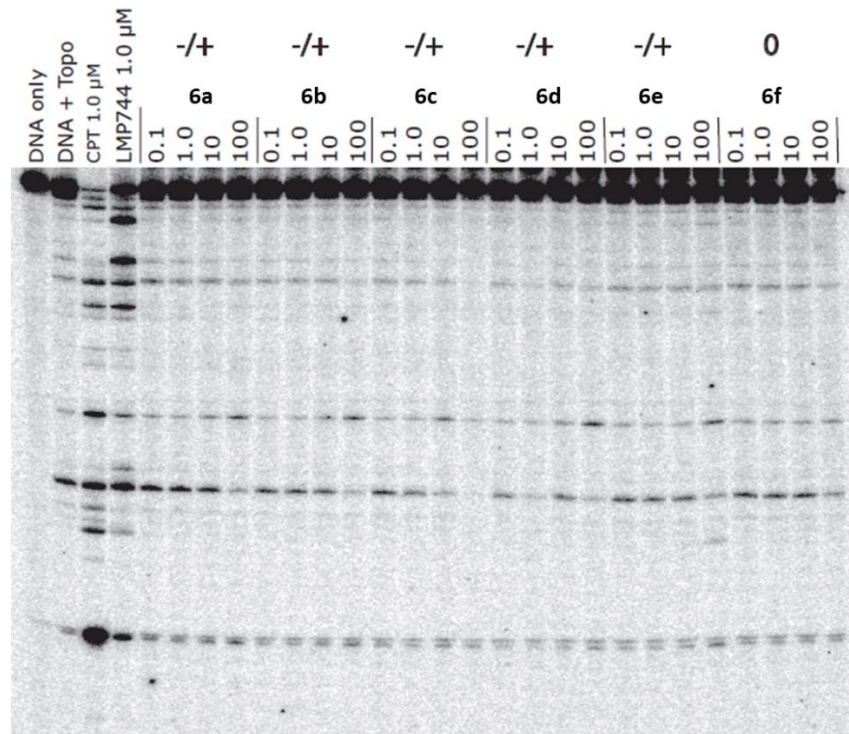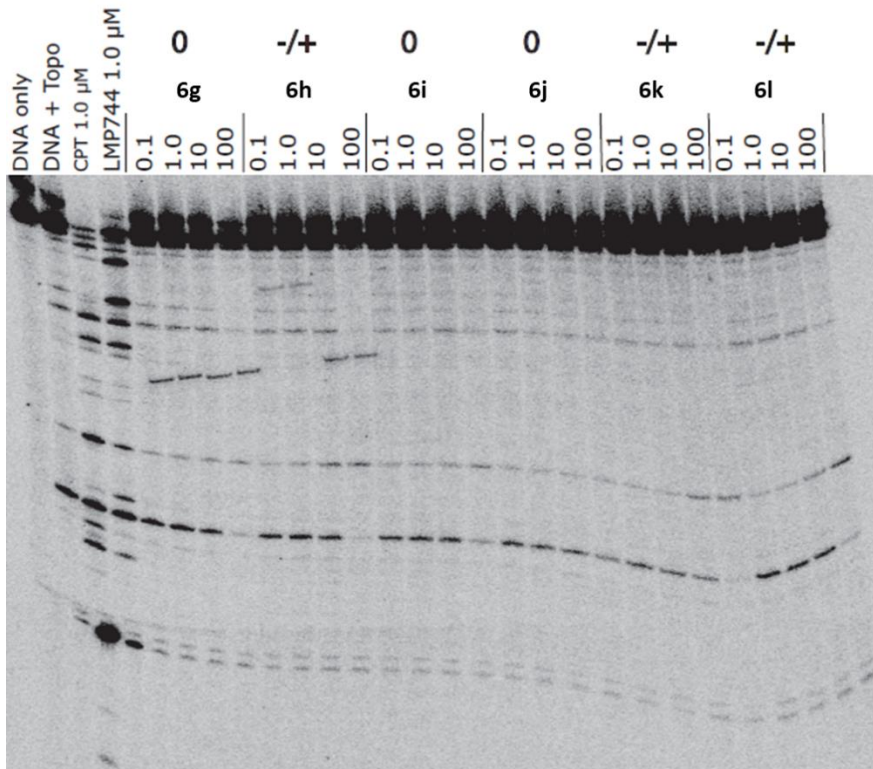

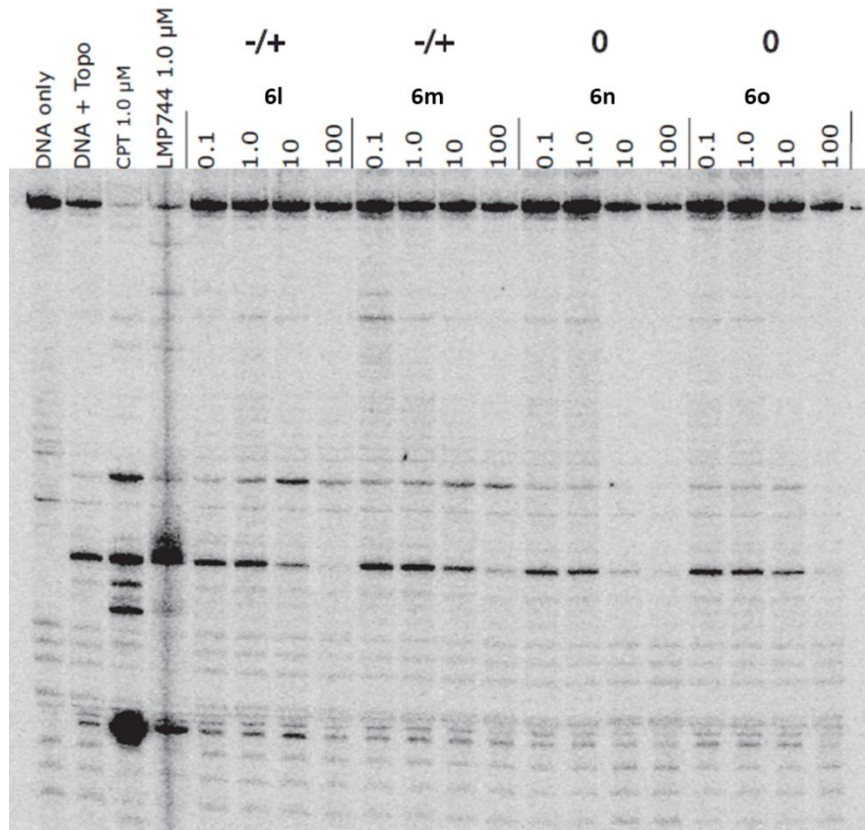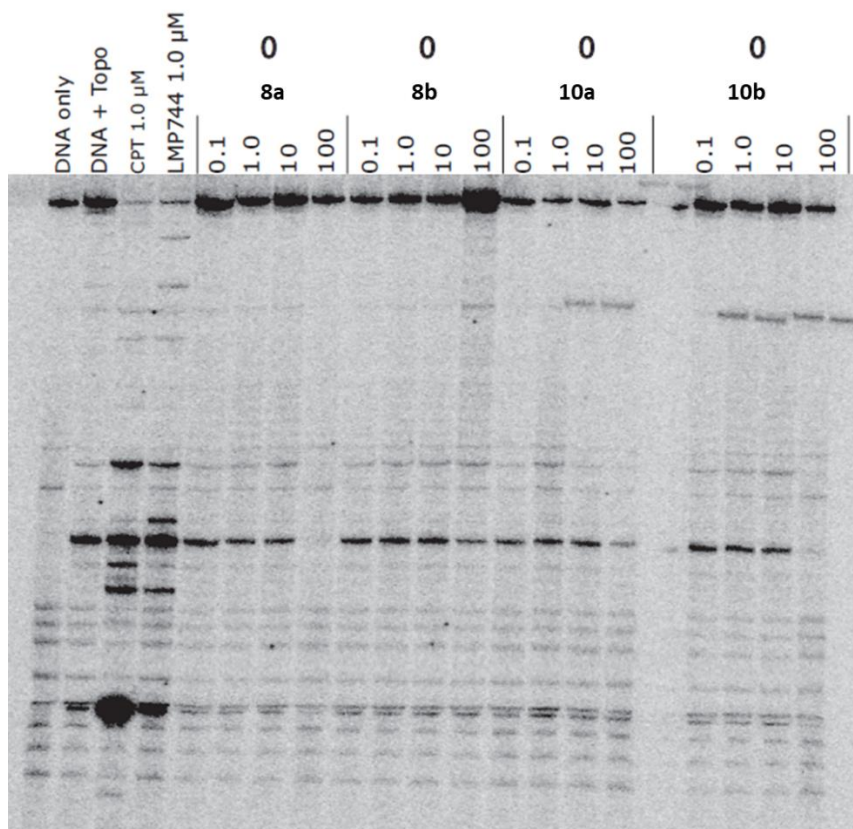

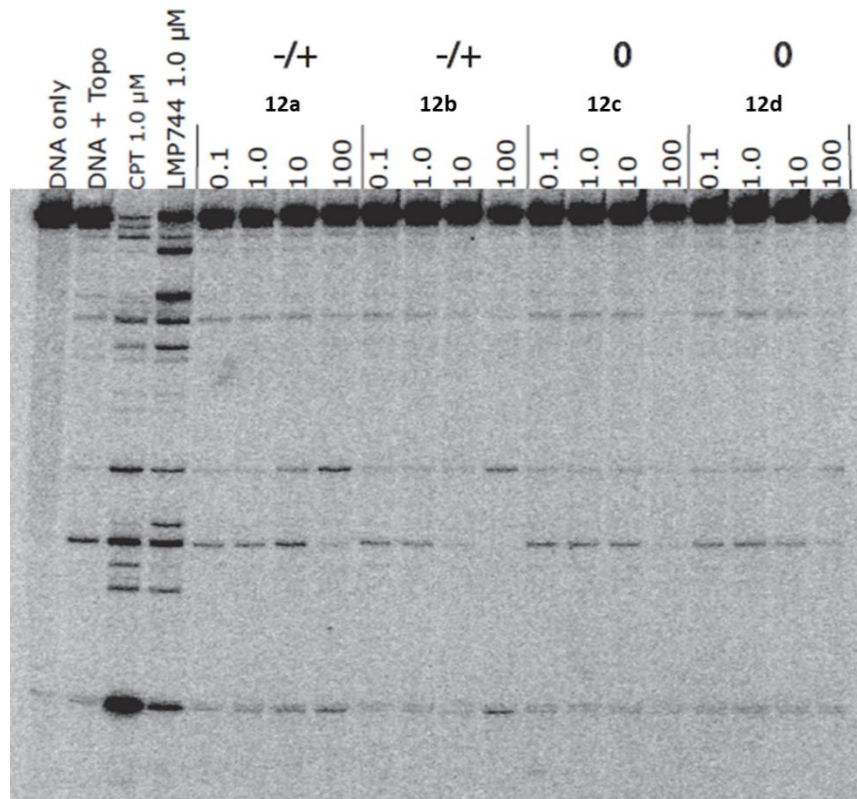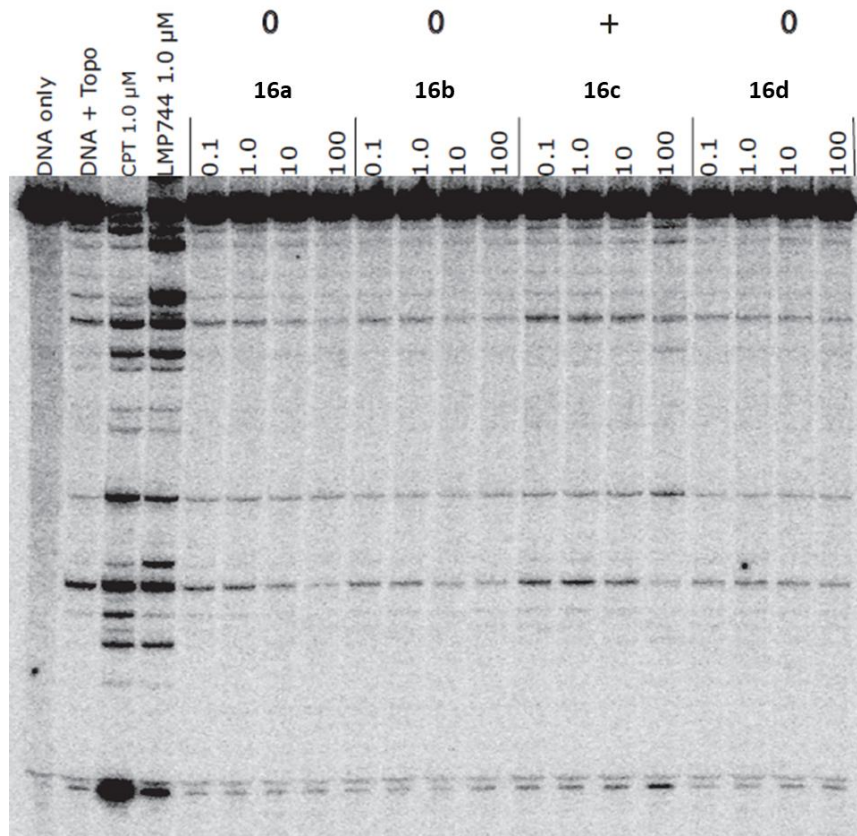

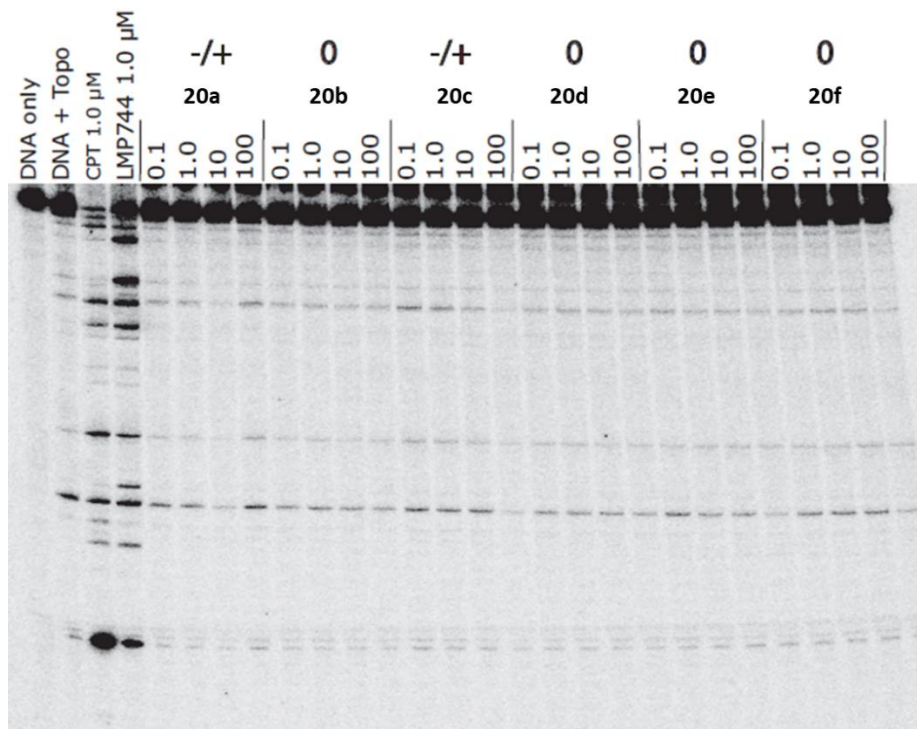

**Figure S1.** TOP1-mediated DNA cleavage induced by compounds **6a-o**, **8a,b**, **10a,b**, **12a-d**, **16a-d** and **20a-f**. From the left: lane 1, DNA only; lane 2, DNA + TOP1; lane 3, CPT (1 $\mu$ M); lane 4, LMP744 (1  $\mu$ M); lanes from 5, tested compounds at 0.1, 1, 10, 100  $\mu$ M.

## Kinase profiling

**Table S1.** IC<sub>50</sub> values of the target quinolines against different kinases.

| Comp.         | IC <sub>50</sub> (nM) |         |         |               |         |         |         |
|---------------|-----------------------|---------|---------|---------------|---------|---------|---------|
|               | FRK                   | IGF-1R  | BTK     | c- <i>Src</i> | VEGFR-1 | VEGFR-2 | HER-2   |
| <b>6a</b>     | 825.45                | 1018.99 | 1585.09 | 783.22        | 95.30   | 268.29  | 1238.62 |
| <b>6b</b>     | 9150.28               | 8062.93 | 8521.88 | 2497.77       | 3332.58 | 6740.59 | 123.00  |
| <b>6c</b>     | 1559.15               | 2034.34 | 2250.63 | 1504.17       | 606.28  | 405.21  | 1380.30 |
| <b>6d</b>     | 506.56                | 1592.03 | 1374.51 | 407.96        | 302.85  | 492.05  | 695.06  |
| <b>6e</b>     | 8998.85               | 2163.20 | 4941.62 | 197.66        | 7329.54 | 3763.81 | 82.10   |
| <b>6f</b>     | 5045.59               | 5345.29 | 8794.35 | 3940.04       | 1729.02 | 1940.12 | 638.82  |
| <b>6g</b>     | 1279.54               | 1482.85 | 4756.76 | 2759.17       | 1109.74 | 997.07  | 454.75  |
| <b>6h</b>     | 330.47                | 196.67  | 3477.02 | 3580.40       | 463.77  | 2454.98 | 1580.82 |
| <b>6i</b>     | 1210.19               | 1711.01 | 7289.68 | 7013.46       | 800.64  | 8238.73 | 1380.98 |
| <b>6j</b>     | 138.75                | 218.75  | 185.48  | 185.84        | 768.93  | 391.62  | 206.41  |
| <b>6k</b>     | 3168.47               | 2395.70 | 2760.92 | 6448.99       | 5037.65 | 5959.68 | 1349.38 |
| <b>6l</b>     | 743.12                | 1817.73 | 1608.41 | 1923.90       | 346.06  | 2397.87 | 756.48  |
| <b>6m</b>     | 2763.16               | 2806.03 | 2458.95 | 980.12        | 864.57  | 2828.75 | 331.90  |
| <b>6n</b>     | 2516.77               | 2808.17 | 819.15  | 82.69         | 555.65  | 1186.92 | 1391.69 |
| <b>6o</b>     | 785.93                | 408.08  | 3828.83 | 3487.44       | 511.46  | 3618.59 | 1379.93 |
| <b>8a</b>     | 845.56                | 1061.81 | 5597.33 | 4537.32       | 648.06  | 6367.57 | 989.01  |
| <b>8b</b>     | 3921.86               | 3900.07 | 2916.17 | 7198.49       | 6959.50 | 8374.57 | 1068.67 |
| <b>10a</b>    | 8910.00               | 197.92  | 4755.43 | 1025.83       | 4388.00 | 8547.43 | 1024.09 |
| <b>10b</b>    | 4372.15               | 5742.42 | 2980.17 | 7775.37       | 8509.91 | 8683.43 | 597.68  |
| <b>12a</b>    | 733.80                | 5366.45 | 195.55  | 55.26         | 1755.01 | 48.29   | 34.77   |
| <b>12b</b>    | 1133.79               | 7156.88 | 213.36  | 42.30         | 5986.46 | 26.97   | 27.31   |
| <b>12c</b>    | 4877.54               | 8995.21 | 99.53   | 118.70        | 7718.25 | 56.89   | 168.65  |
| <b>12d</b>    | 6534.31               | 452.80  | 653.35  | 1452.31       | 2536.64 | 854.67  | 897.05  |
| <b>16a</b>    | 6147.60               | 5232.65 | 4804.88 | 1347.51       | 1963.43 | 3408.44 | 2016.89 |
| <b>16b</b>    | 3129.15               | 3491.20 | 2884.60 | 1324.72       | 1266.97 | 3231.53 | 2313.75 |
| <b>16c</b>    | 6668.22               | 6690.88 | 5624.98 | 1733.09       | 2556.44 | 5095.37 | 1610.40 |
| <b>16d</b>    | 1732.93               | 2229.33 | 2097.21 | 3897.24       | 1768.49 | 4692.09 | 357.58  |
| <b>20a</b>    | 2616.37               | 2859.51 | 8668.64 | 2903.25       | 1351.78 | 1251.85 | 1012.65 |
| <b>20b</b>    | 8713.05               | 8905.71 | 8976.83 | 4212.78       | 4737.61 | 2301.72 | 1650.64 |
| <b>20c</b>    | 1436.19               | 1882.31 | 8667.93 | 9054.63       | 1751.70 | 8969.80 | 1231.21 |
| <b>20d</b>    | 133.32                | 41.23   | 1776.06 | 250.84        | 711.77  | 294.23  | 1768.17 |
| <b>20e</b>    | 216.42                | 3014.15 | 271.20  | 137.68        | 720.44  | 242.54  | 98.78   |
| <b>20f</b>    | 631.98                | 3528.39 | 23.47   | 92.14         | 870.40  | 89.35   | 250.64  |
| <b>TAE226</b> | 321.76                | 125.79  | 133.94  | 864.05        | 224.58  | 246.37  | 390.08  |

## Representative HPLC traces

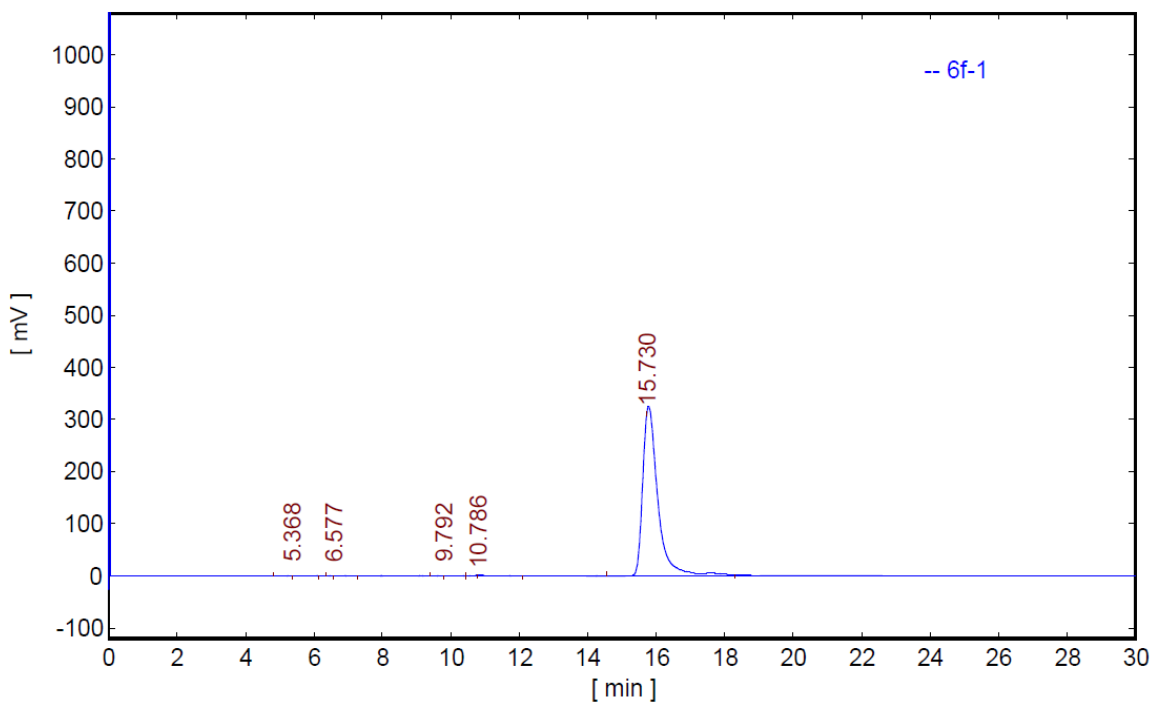

| No. | Time    | Area      | Hight     | % Conc. |
|-----|---------|-----------|-----------|---------|
| 1   | 5.36830 | 17078.85  | 669.71    | 0.17    |
| 2   | 6.57709 | 17783.21  | 791.42    | 0.18    |
| 3   | 9.79209 | 23857.56  | 1010.08   | 0.24    |
| 4   | 10.7856 | 49604.19  | 1990.82   | 0.49    |
| 5   | 15.7298 | 0025772.2 | 326459.65 | 98.93   |

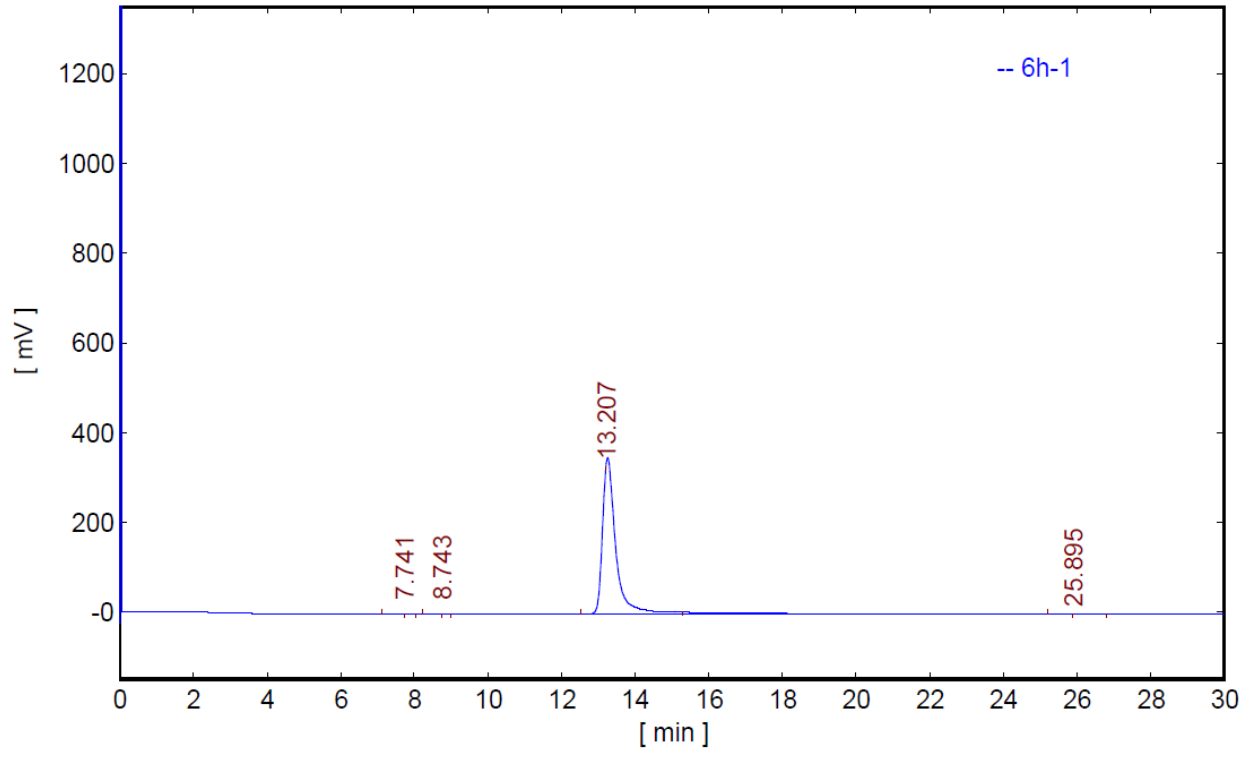

| No. | Time    | Area       | Hight     | % Conc. |
|-----|---------|------------|-----------|---------|
| 1   | 7.74127 | 5586.25    | 154.61    | 0.07    |
| 2   | 8.74340 | 5377.98    | 254.05    | 0.06    |
| 3   | 13.2067 | 8523139.41 | 347128.01 | 99.75   |
| 4   | 25.8947 | 10550.28   | 238.14    | 0.12    |



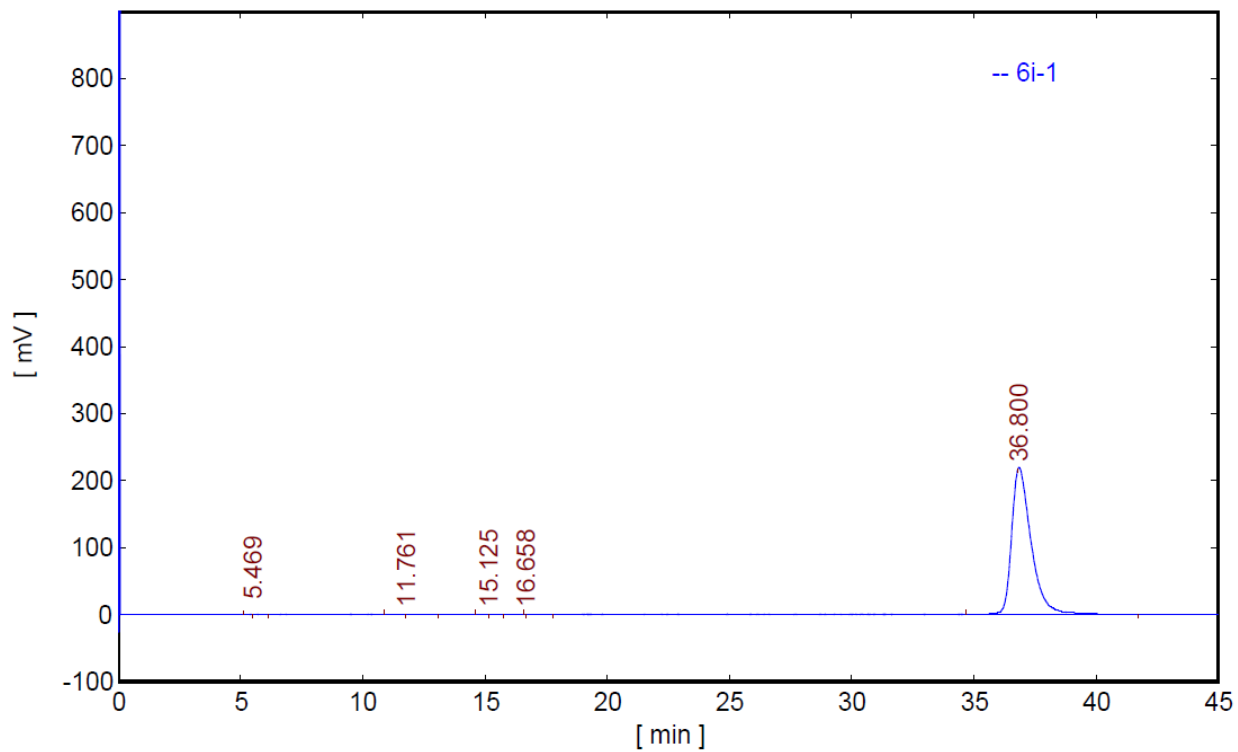

| No. | Time    | Area       | Hight     | % Conc. |
|-----|---------|------------|-----------|---------|
| 1   | 5.46920 | 5196.88    | 200.89    | 0.04    |
| 2   | 11.7606 | 22951.78   | 390.46    | 0.19    |
| 3   | 15.1251 | 10567.63   | 460.29    | 0.09    |
| 4   | 16.6583 | 5907.20    | 45.29     | 0.05    |
| 5   | 36.8001 | 12063367.6 | 219255.17 | 99.63   |

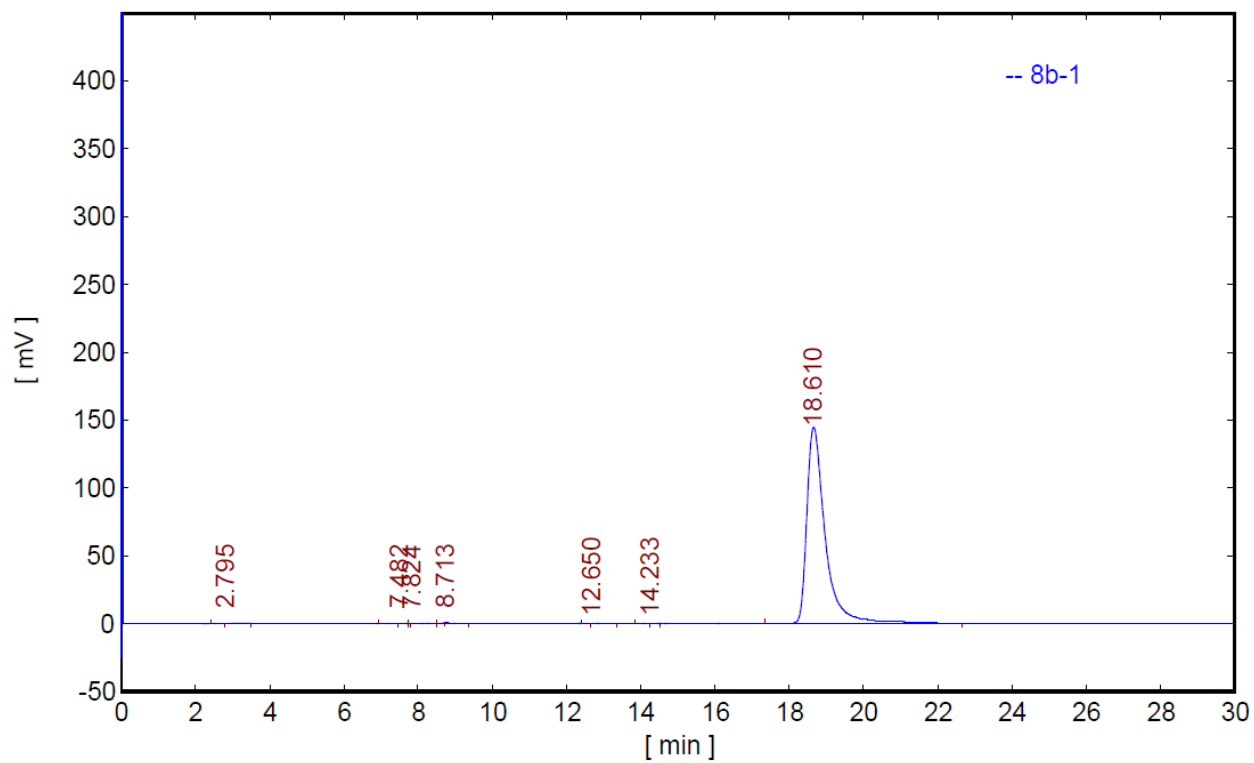

| No. | Time    | Area       | Hight     | % Conc. |
|-----|---------|------------|-----------|---------|
| 1   | 2.79482 | 5410.71    | 229.53    | 0.11    |
| 2   | 7.48237 | 10709.48   | 369.94    | 0.22    |
| 3   | 7.82366 | 6247.08    | 151.18    | 0.13    |
| 4   | 8.71322 | 12992.29   | 1050.26   | 0.26    |
| 5   | 12.6497 | 9180.99    | 340.63    | 0.18    |
| 6   | 14.2325 | 7281.03    | 289.16    | 0.15    |
| 7   | 18.6099 | 4921757.34 | 144978.32 | 98.96   |

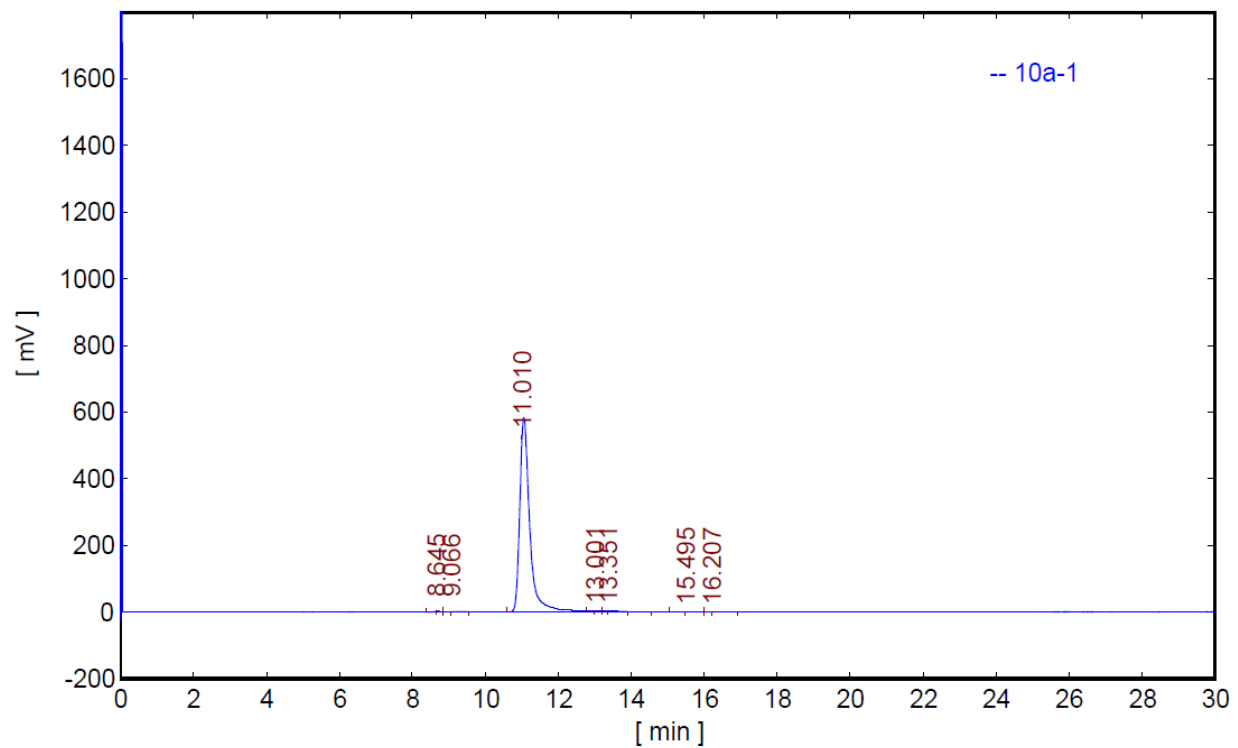

| No. | Time    | Area       | Hight     | % Conc. |
|-----|---------|------------|-----------|---------|
| 1   | 8.64536 | 30346.51   | 3974.23   | 0.27    |
| 2   | 9.06580 | 17570.42   | 1073.60   | 0.16    |
| 3   | 11.0103 | 11136381.7 | 591386.75 | 98.63   |
| 4   | 13.0008 | 12307.09   | 743.23    | 0.11    |
| 5   | 13.3508 | 33758.24   | 1563.75   | 0.30    |
| 6   | 15.4949 | 43342.38   | 1189.39   | 0.38    |
| 7   | 16.2072 | 17803.62   | 686.46    | 0.16    |

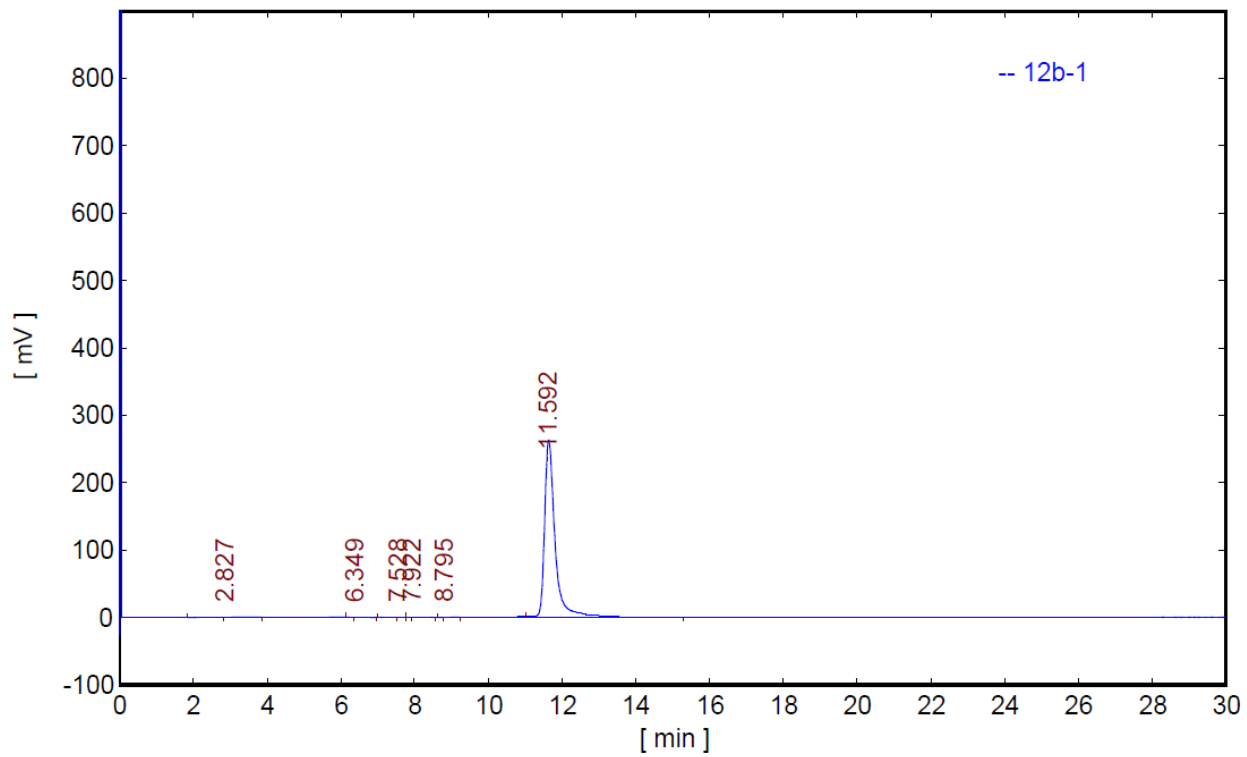

| No. | Time    | Area       | Hight     | % Conc. |
|-----|---------|------------|-----------|---------|
| 1   | 2.82687 | 15783.72   | 275.01    | 0.30    |
| 2   | 6.34896 | 14799.62   | 380.91    | 0.28    |
| 3   | 7.52754 | 9120.26    | 322.91    | 0.17    |
| 4   | 7.92236 | 9995.42    | 217.15    | 0.19    |
| 5   | 8.79526 | 5692.54    | 443.95    | 0.11    |
| 6   | 11.5919 | 5177474.76 | 266303.41 | 98.94   |

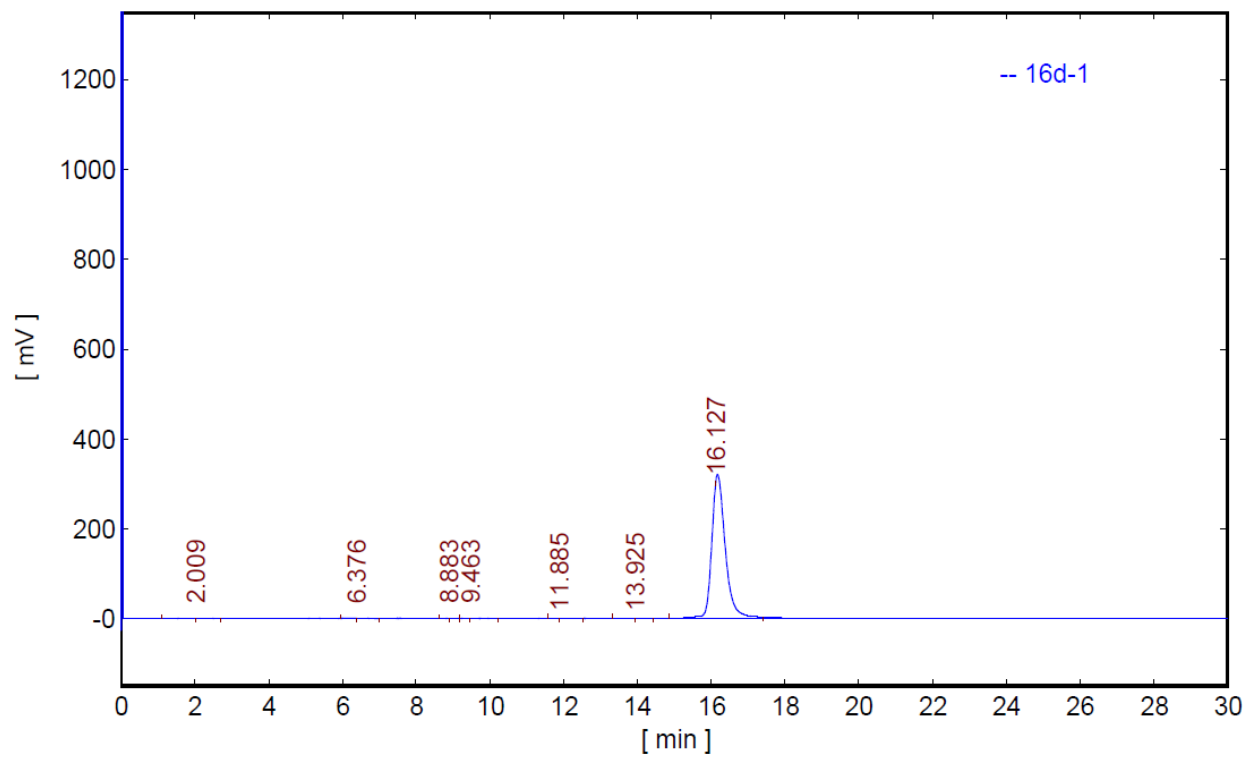

| No. | Time    | Area       | Hight     | % Conc. |
|-----|---------|------------|-----------|---------|
| 1   | 2.00876 | 16147.84   | 382.58    | 0.20    |
| 2   | 6.37583 | 13388.29   | 433.04    | 0.16    |
| 3   | 8.88264 | 7523.51    | 480.73    | 0.09    |
| 4   | 9.46339 | 8706.04    | 267.45    | 0.11    |
| 5   | 11.8850 | 12436.89   | 503.58    | 0.15    |
| 6   | 13.9251 | 11058.41   | 345.71    | 0.14    |
| 7   | 16.1265 | 8114469.22 | 322679.85 | 99.15   |

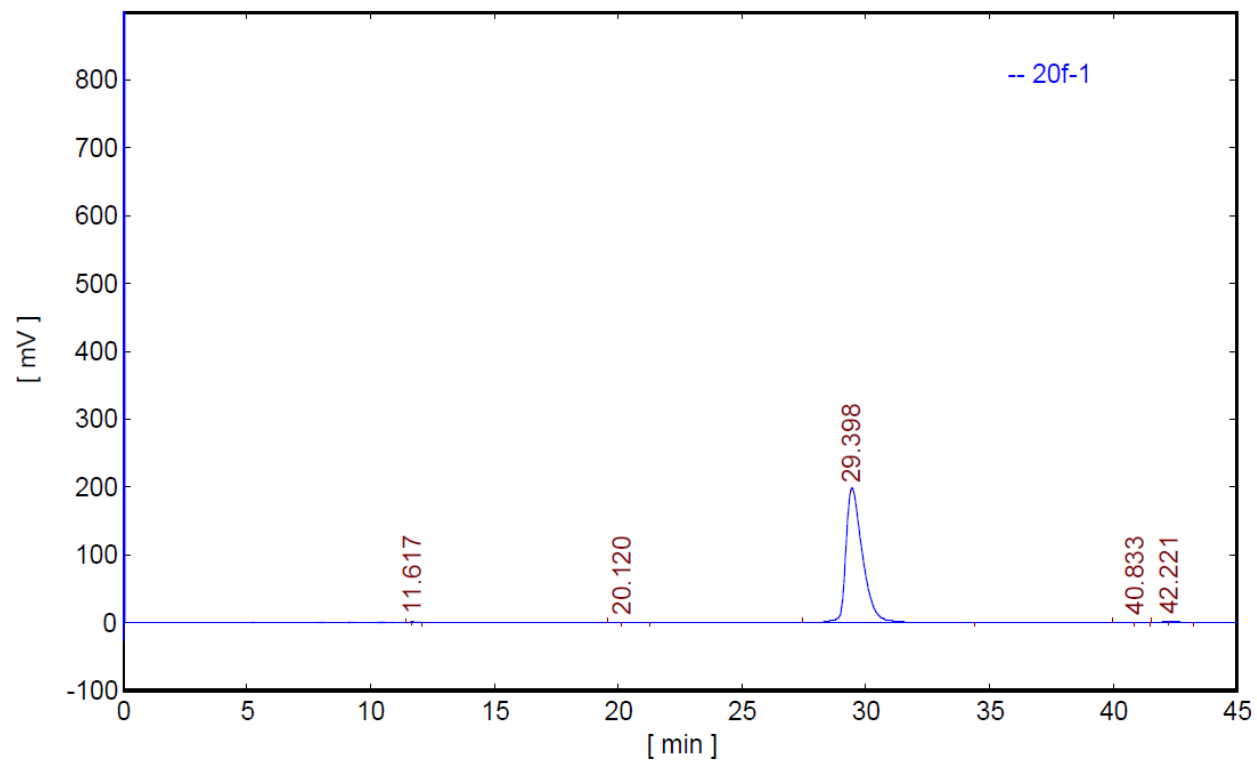

| No. | Time    | Area       | Hight     | % Conc. |
|-----|---------|------------|-----------|---------|
| 1   | 11.6165 | 19836.34   | 1648.32   | 0.21    |
| 2   | 20.1197 | 15111.46   | 331.22    | 0.16    |
| 3   | 29.3984 | 9177196.25 | 198282.67 | 98.79   |
| 4   | 40.8329 | 17747.66   | 456.74    | 0.19    |
| 5   | 42.2212 | 59459.82   | 1529.21   | 0.64    |
